# Supplementary material for: Electron-deficient cyclopropenium cations as Lewis acids in FLP chemistry
Source: Royal Society of Chemistry journal article supplement (doi:10.1039/d3cc02684a), 2023-01-01
Supplement: d3cc02684a1.pdf [file d3cc02684a1.pdf]

## Electronic Supporting Information

# Electron-deficient cyclopropenium cations as Lewis acids in FLP chemistry

Dipendu Mandal,<sup>a,b</sup> Zheng-Wang Qu<sup>\*c</sup>, Stefan Grimme<sup>c</sup> and Douglas W. Stephan<sup>\*a,b</sup>

<sup>a</sup>Department of Chemistry, University of Toronto, 80 St. George Street, Toronto, Ontario M5S 3H6, Canada

<sup>b</sup>Institute of Drug Discovery Technology, Ningbo University, Ningbo 315211, Zhejiang, China

<sup>c</sup>Mulliken Center for Theoretical Chemistry, Clausius Institut für Physikalische und Theoretische Chemie, Rheinische Friedrich-Wilhelms-Universität Bonn, Beringstrasse 4, 53115 Bonn

<sup>\*</sup>Corresponding Author

## Table of Contents

|                                                                                                                                                                                                            |          |
|------------------------------------------------------------------------------------------------------------------------------------------------------------------------------------------------------------|----------|
| <b>Experimental .....</b>                                                                                                                                                                                  | <b>6</b> |
| General information for synthesis .....                                                                                                                                                                    | 6        |
| General synthesis for aryl(chloro)cyclopropenes <sup>5</sup> .....                                                                                                                                         | 8        |
| Synthetic procedures and characterization data .....                                                                                                                                                       | 8        |
| Synthesis 1 .....                                                                                                                                                                                          | 8        |
| Synthesis 2a .....                                                                                                                                                                                         | 9        |
| Synthesis 2b .....                                                                                                                                                                                         | 10       |
| Synthesis 2c .....                                                                                                                                                                                         | 10       |
| Synthesis 3 .....                                                                                                                                                                                          | 11       |
| Synthesis 4a .....                                                                                                                                                                                         | 12       |
| Synthesis 4b .....                                                                                                                                                                                         | 13       |
| Synthesis 5 .....                                                                                                                                                                                          | 13       |
| Synthesis 6 .....                                                                                                                                                                                          | 14       |
| Synthesis 7 .....                                                                                                                                                                                          | 15       |
| Synthesis 8 .....                                                                                                                                                                                          | 16       |
| Synthesis 9 and 9' .....                                                                                                                                                                                   | 17       |
| Synthesis 10 .....                                                                                                                                                                                         | 18       |
| Synthesis 11 and 12 .....                                                                                                                                                                                  | 19       |
| Synthesis 13 .....                                                                                                                                                                                         | 20       |
| Synthesis 14 .....                                                                                                                                                                                         | 21       |
| Synthesis 15 .....                                                                                                                                                                                         | 21       |
| Synthesis 16 .....                                                                                                                                                                                         | 22       |
| Cyclic Voltammetry (CV) data for all compounds .....                                                                                                                                                       | 24       |
| Compound 2a .....                                                                                                                                                                                          | 24       |
| Figure S1. Evolution of CV of 2a (0.1 M) in CH <sub>3</sub> CN/DCM (1:1) with [( <i>n</i> -Bu) <sub>4</sub> N]PF <sub>6</sub> as supporting electrolyte. Scan rate employed: 0.1 V s <sup>-1</sup> . ..... | 24       |

|                                                                                                                                                                                                          |           |
|----------------------------------------------------------------------------------------------------------------------------------------------------------------------------------------------------------|-----------|
| Figure S2. Evolution of CV of 2a with internal ferrocene standard.....                                                                                                                                   | 24        |
| Compound 3.....                                                                                                                                                                                          | 25        |
| Figure S3. Evolution of CV of 3 (0.1 M) in CH <sub>3</sub> CN/DCM (1:1) with [( <i>n</i> -Bu) <sub>4</sub> N]PF <sub>6</sub> as supporting electrolyte. Scan rate employed: 0.1 V s <sup>-1</sup> .....  | 25        |
| Figure S4. Evolution of CV of 3 with internal ferrocene standard.....                                                                                                                                    | 25        |
| Compound 4a.....                                                                                                                                                                                         | 26        |
| Figure S5. Evolution of CV of 4a (0.1 M) in CH <sub>3</sub> CN/DCM (1:1) with [( <i>n</i> -Bu) <sub>4</sub> N]PF <sub>6</sub> as supporting electrolyte. Scan rate employed: 0.1 V s <sup>-1</sup> ..... | 26        |
| Figure S6. Evolution of CV of 4a with internal ferrocene standard.....                                                                                                                                   | 26        |
| Compound 5.....                                                                                                                                                                                          | 27        |
| Figure S7. Evolution of CV of 5 (0.1 M) in CH <sub>3</sub> CN/DCM (1:1) with [( <i>n</i> -Bu) <sub>4</sub> N]PF <sub>6</sub> as supporting electrolyte. Scan rate employed: 0.1 V s <sup>-1</sup> .....  | 27        |
| Figure S8. Evolution of CV of 5 with internal ferrocene standard.....                                                                                                                                    | 27        |
| Compound 6.....                                                                                                                                                                                          | 28        |
| Figure S9. Evolution of CV of 6 (0.1 M) in CH <sub>3</sub> CN/DCM (1:1) with [( <i>n</i> -Bu) <sub>4</sub> N]PF <sub>6</sub> as supporting electrolyte. Scan rate employed: 0.1 V s <sup>-1</sup> .....  | 28        |
| Figure S10. Evolution of CV of 6 with internal ferrocene standard.....                                                                                                                                   | 28        |
| Compound 7.....                                                                                                                                                                                          | 29        |
| Figure S11. Evolution of CV of 7 (0.1 M) in CH <sub>3</sub> CN/DCM (1:1) with [( <i>n</i> -Bu) <sub>4</sub> N]PF <sub>6</sub> as supporting electrolyte. Scan rate employed: 0.1 V s <sup>-1</sup> ..... | 29        |
| Figure S12. Evolution of CV of 7 with internal ferrocene standard.....                                                                                                                                   | 29        |
| <b>NMR spectra of all the compounds .....</b>                                                                                                                                                            | <b>30</b> |
| Compound 1.....                                                                                                                                                                                          | 30        |
| Figure S13. <sup>1</sup> H NMR (400 MHz) spectrum of the compound 1 in CDCl <sub>3</sub> (#= CDCl <sub>3</sub> ). .....                                                                                  | 30        |
| Figure S14. <sup>19</sup> F NMR (377 MHz) spectrum of the compound 1 in CDCl <sub>3</sub> . .....                                                                                                        | 30        |
| Figure S15. <sup>11</sup> B NMR (128 MHz) spectrum of the compound 1 in CDCl <sub>3</sub> . .....                                                                                                        | 31        |
| Figure S16. <sup>13</sup> C NMR (101 MHz) spectrum of the compound 1 in CDCl <sub>3</sub> (*= CDCl <sub>3</sub> ). .....                                                                                 | 31        |
| Compound 2a.....                                                                                                                                                                                         | 32        |
| Figure S17. <sup>1</sup> H NMR (500 MHz) spectrum of the compound 2a in CDCl <sub>3</sub> /CH <sub>2</sub> Cl <sub>2</sub> (1:5) (#= CDCl <sub>3</sub> ; *= CH <sub>2</sub> Cl <sub>2</sub> ). .....     | 32        |
| Figure S18. <sup>19</sup> F NMR (471 MHz) spectrum of the compound 2a in CDCl <sub>3</sub> /CH <sub>2</sub> Cl <sub>2</sub> (1:5). .....                                                                 | 32        |
| Figure S19. <sup>11</sup> B NMR (161 MHz) spectrum of the compound 2a in CDCl <sub>3</sub> /CH <sub>2</sub> Cl <sub>2</sub> (1:5). .....                                                                 | 33        |
| Compound 2b.....                                                                                                                                                                                         | 34        |
| Figure S21. <sup>1</sup> H NMR (400 MHz) spectrum of the compound 2b in CDCl <sub>3</sub> (*= CDCl <sub>3</sub> ). .....                                                                                 | 34        |
| Figure S22. <sup>19</sup> F NMR (377 MHz) spectrum of the compound 2b in CDCl <sub>3</sub> . .....                                                                                                       | 34        |
| Figure S23. <sup>11</sup> B NMR (128 MHz) spectrum of the compound 2b in CDCl <sub>3</sub> . .....                                                                                                       | 35        |
| Compound 2c.....                                                                                                                                                                                         | 36        |
| Figure S25. <sup>1</sup> H NMR (400 MHz) spectrum of the compound 2c in CDCl <sub>3</sub> /CH <sub>2</sub> Cl <sub>2</sub> (1:5) (*= CDCl <sub>3</sub> ; #= CH <sub>2</sub> Cl <sub>2</sub> ). .....     | 36        |
| Figure S26. <sup>19</sup> F NMR (377 MHz) spectrum of the compound 2c in CDCl <sub>3</sub> /CH <sub>2</sub> Cl <sub>2</sub> (1:5). .....                                                                 | 36        |
| Figure S27. <sup>13</sup> C NMR (101 MHz) spectrum of the compound 2c in CDCl <sub>3</sub> /CH <sub>2</sub> Cl <sub>2</sub> (1:5) (*= CDCl <sub>3</sub> ; #= CH <sub>2</sub> Cl <sub>2</sub> ). .....    | 37        |
| Compound 3.....                                                                                                                                                                                          | 38        |

|                                                                                                                                          |    |
|------------------------------------------------------------------------------------------------------------------------------------------|----|
| Figure S28. <sup>1</sup> H NMR (400 MHz) spectrum of the compound 3 in CD <sub>3</sub> CN (*= residual toluene; #= CD <sub>3</sub> CN).  | 38 |
| Figure S29. <sup>19</sup> F NMR (377 MHz) spectrum of the compound 3 in CD <sub>3</sub> CN.                                              | 38 |
| Figure S30. <sup>11</sup> B NMR (128 MHz) spectrum of the compound 3 in CD <sub>3</sub> CN.                                              | 39 |
| Figure S31. <sup>13</sup> C NMR (101 MHz) spectrum of the compound 3 in CD <sub>3</sub> CN (*= residual toluene; #= CD <sub>3</sub> CN). | 39 |
| Compound 4a.                                                                                                                             | 40 |
| Figure S32. <sup>1</sup> H NMR (400 MHz) spectrum of the compound 4a in CD <sub>3</sub> CN (#= CD <sub>3</sub> CN).                      | 40 |
| Figure S33. <sup>19</sup> F NMR (377 MHz) spectrum of the compound 4a in CD <sub>3</sub> CN.                                             | 40 |
| Figure S34. <sup>11</sup> B NMR (128 MHz) spectrum of the compound 4a in CD <sub>3</sub> CN.                                             | 41 |
| Compound 4b.                                                                                                                             | 42 |
| Figure S36. <sup>1</sup> H NMR (400 MHz) spectrum of the compound 4b in CD <sub>3</sub> CN (#= CD <sub>3</sub> CN).                      | 42 |
| Figure S37. <sup>19</sup> F NMR (377 MHz) spectrum of the compound 4b in CD <sub>3</sub> CN.                                             | 42 |
| Compound 5.                                                                                                                              | 43 |
| Figure S38. <sup>1</sup> H NMR (400 MHz) spectrum of the compound 5 in CD <sub>3</sub> CN (*= CD <sub>3</sub> CN, #= residual toluene).  | 43 |
| Figure S39. <sup>19</sup> F NMR (377 MHz) spectrum of the compound 5 in CD <sub>3</sub> CN.                                              | 43 |
| Figure S40. <sup>11</sup> B NMR (128 MHz) spectrum of the compound 5 in CD <sub>3</sub> CN.                                              | 44 |
| Figure S41. <sup>13</sup> C NMR (101 MHz) spectrum of the compound 5 in CD <sub>3</sub> CN (*= CD <sub>3</sub> CN, #= residual toluene). | 44 |
| Compound 6.                                                                                                                              | 45 |
| Figure S42. <sup>1</sup> H NMR (500 MHz) spectrum of the compound 6 in CD <sub>3</sub> CN (*= CD <sub>3</sub> CN).                       | 45 |
| Figure S43. <sup>19</sup> F NMR (377 MHz) spectrum of the compound 6 in CD <sub>3</sub> CN.                                              | 45 |
| Figure S44. <sup>11</sup> B NMR (161 MHz) spectrum of the compound 6 in CD <sub>3</sub> CN.                                              | 46 |
| Figure S45. <sup>13</sup> C NMR (101 MHz) spectrum of the compound 6 in CD <sub>3</sub> CN (*= CD <sub>3</sub> CN).                      | 46 |
| Compound 7.                                                                                                                              | 47 |
| Figure S46. <sup>1</sup> H NMR (400 MHz) spectrum of the compound 7 in CD <sub>3</sub> CN (*= impurities; #= CD <sub>3</sub> CN).        | 47 |
| Figure S47. <sup>19</sup> F NMR (377 MHz) spectrum of the compound 7 in CD <sub>3</sub> CN.                                              | 47 |
| Figure S48. <sup>11</sup> B NMR (128 MHz) spectrum of the compound 7 in CD <sub>3</sub> CN.                                              | 48 |
| Figure S49. <sup>13</sup> C NMR (101 MHz) spectrum of the compound 7 in CD <sub>3</sub> CN (*= impurities, #= CD <sub>3</sub> CN).       | 48 |
| Compound 8.                                                                                                                              | 49 |
| Figure S50. <sup>1</sup> H NMR (400 MHz) spectrum of the compound 8 in CDCl <sub>3</sub> (*= CDCl <sub>3</sub> ).                        | 49 |
| Figure S51. <sup>31</sup> P NMR (162 MHz) spectrum of the compound 8 in CDCl <sub>3</sub> .                                              | 49 |
| Figure S52. <sup>31</sup> P{ <sup>1</sup> H} NMR (162 MHz) spectrum of the compound 8 in CDCl <sub>3</sub> .                             | 50 |
| Figure S53. <sup>19</sup> F NMR (377 MHz) spectrum of the compound 8 in CDCl <sub>3</sub> .                                              | 50 |
| Figure S54. <sup>11</sup> B NMR (128 MHz) spectrum of the compound 8 in CDCl <sub>3</sub> .                                              | 51 |
| Figure S55. <sup>13</sup> C NMR (101 MHz) spectrum of the compound 8 in CDCl <sub>3</sub> (*= CDCl <sub>3</sub> ).                       | 51 |
| Compound 9 and 9'.                                                                                                                       | 52 |
| Figure S56. <sup>1</sup> H NMR (400 MHz) spectrum of the compounds 9 and 9' in CD <sub>3</sub> CN/DCM (1:2) (*= DCM).                    | 52 |
| Figure S57. <sup>31</sup> P NMR (162 MHz) spectrum of the compounds 9 and 9' in CD <sub>3</sub> CN/DCM (1:2).                            | 52 |
| Figure S58. <sup>31</sup> P{ <sup>1</sup> H} NMR (162 MHz) spectrum of the compounds 9 and 9' in CD <sub>3</sub> CN/DCM (1:2).           | 53 |
| Figure S59. <sup>19</sup> F NMR (377 MHz) spectrum of the compounds 9 and 9' in CD <sub>3</sub> CN/DCM (1:2).                            | 53 |

|                                                                                                                                                                                                            |           |
|------------------------------------------------------------------------------------------------------------------------------------------------------------------------------------------------------------|-----------|
| Figure S60. <sup>19</sup> F NMR (377 MHz) EXPANSION spectrum (-134 to -162 ppm) of the compounds 9 and 9'.....                                                                                             | 54        |
| Figure S61. <sup>11</sup> B NMR (128 MHz)spectrum of the compounds 9 and 9' in CD <sub>3</sub> CN/DCM (1:2).....                                                                                           | 54        |
| Figure S62. <sup>13</sup> C NMR (101 MHz) spectrum of the compounds 9 and 9' in CD <sub>3</sub> CN/DCM (1:2). .....                                                                                        | 55        |
| Compound 10.....                                                                                                                                                                                           | 56        |
| Figure S63. <sup>1</sup> H NMR (400 MHz) spectrum of the compound 10 in CD <sub>3</sub> CN/DCM (1:2) (*= DCM, #= CD <sub>3</sub> CN). .....                                                                | 56        |
| Figure S64. <sup>31</sup> P NMR (162 MHz) spectrum of the compound 10 in CD <sub>3</sub> CN/DCM (1:2). .....                                                                                               | 56        |
| Figure S65. <sup>31</sup> P{ <sup>1</sup> H} NMR (162 MHz) spectrum of the compound 10 in CD <sub>3</sub> CN/DCM (1:2).....                                                                                | 57        |
| Figure S66. <sup>19</sup> F NMR (377 MHz) spectrum of the compound 10 in CD <sub>3</sub> CN/DCM (1:2). .....                                                                                               | 57        |
| Figure S67. <sup>19</sup> F NMR (377 MHz) EXPANSION spectrum (-133 to -137 ppm) of the compound 10. 58                                                                                                     |           |
| Figure S68. <sup>11</sup> B NMR (128 MHz)spectrum of the compound 10 in CD <sub>3</sub> CN/DCM (1:2). .....                                                                                                | 58        |
| Figure S69. <sup>13</sup> C NMR (101 MHz) spectrum of the compound 10 in CD <sub>3</sub> CN/DCM (1:2). .....                                                                                               | 59        |
| Compound 11.....                                                                                                                                                                                           | 60        |
| Figure S70. <sup>31</sup> P NMR (162 MHz) spectrum of the compound 11 in DCM (*= [tBu <sub>3</sub> PH][B(C <sub>6</sub> F <sub>5</sub> ) <sub>4</sub> ]). ..                                               | 60        |
| Figure S71. <sup>31</sup> P{ <sup>1</sup> H} NMR (162 MHz) spectrum of the compound 11 in DCM (*= [tBu <sub>3</sub> PH][B(C <sub>6</sub> F <sub>5</sub> ) <sub>4</sub> ]).60                               |           |
| Figure S72. <sup>19</sup> F NMR (377 MHz) spectrum of the compound 11 in DCM.....                                                                                                                          | 61        |
| Figure S73. <sup>11</sup> B NMR (128 MHz)spectrum of the compound 11 in DCM. ....                                                                                                                          | 61        |
| Compound 12.....                                                                                                                                                                                           | 62        |
| Figure S74. <sup>1</sup> H NMR (400 MHz) spectrum of the compound 12 in CDCl <sub>3</sub> (*= CDCl <sub>3</sub> ). .....                                                                                   | 62        |
| Figure S75. <sup>13</sup> C NMR (101 MHz) spectrum of the compound 12 in CDCl <sub>3</sub> (*= CDCl <sub>3</sub> ). .....                                                                                  | 62        |
| Compound 13.....                                                                                                                                                                                           | 63        |
| Figure S76. <sup>1</sup> H NMR (400 MHz) spectrum of the compound 13 in CDCl <sub>3</sub> (*= CDCl <sub>3</sub> , #=DCM).....                                                                              | 63        |
| Figure S77. <sup>19</sup> F NMR (377 MHz) spectrum of the compound 13 in CDCl <sub>3</sub> (*= CDCl <sub>3</sub> ). .....                                                                                  | 63        |
| Figure S78. <sup>13</sup> C NMR (101 MHz) spectrum of the compound 13 in CDCl <sub>3</sub> (*= CDCl <sub>3</sub> ). .....                                                                                  | 64        |
| Compound 14.....                                                                                                                                                                                           | 65        |
| Figure S79. <sup>1</sup> H NMR (400 MHz) spectrum of the compound 14 in CDCl <sub>3</sub> (*= CDCl <sub>3</sub> , #=DCM).....                                                                              | 65        |
| Figure S80. <sup>13</sup> C NMR (101 MHz) spectrum of the compound 14 in CDCl <sub>3</sub> (*= CDCl <sub>3</sub> ). .....                                                                                  | 66        |
| Compound 15.....                                                                                                                                                                                           | 67        |
| Figure S81. <sup>1</sup> H NMR (400 MHz) spectrum of the compound 15 in CDCl <sub>3</sub> (*= CDCl <sub>3</sub> , #=DCM).....                                                                              | 67        |
| Figure S82. <sup>19</sup> F NMR (377 MHz) spectrum of the compound 15 in CDCl <sub>3</sub> (*= CDCl <sub>3</sub> ). .....                                                                                  | 67        |
| Figure S83. <sup>13</sup> C NMR (101 MHz) spectrum of the compound 15 in CDCl <sub>3</sub> (*= CDCl <sub>3</sub> ). .....                                                                                  | 68        |
| Compound 16.....                                                                                                                                                                                           | 69        |
| Figure S84. <sup>1</sup> H NMR (400 MHz) spectrum of the compound 16 in CDCl <sub>3</sub> (*= CDCl <sub>3</sub> ). .....                                                                                   | 69        |
| Figure S85. <sup>31</sup> P NMR (126 MHz) spectrum of the compound 16 in CDCl <sub>3</sub> (#=[HP( <i>o</i> -Tol) <sub>3</sub> ][B(C <sub>6</sub> F <sub>5</sub> ) <sub>4</sub> ]).69                      |           |
| Figure S86. <sup>31</sup> P{ <sup>1</sup> H} NMR (126 MHz) spectrum of the compound 16 in CDCl <sub>3</sub> (#=[HP( <i>o</i> -Tol) <sub>3</sub> ][B(C <sub>6</sub> F <sub>5</sub> ) <sub>4</sub> ]). ..... | 70        |
| Figure S87. <sup>19</sup> F NMR (377 MHz) spectrum of the compound 16 in CDCl <sub>3</sub> . .....                                                                                                         | 70        |
| Figure S88. <sup>11</sup> B NMR (127 MHz) spectrum of the compound 16 in CDCl <sub>3</sub> . .....                                                                                                         | 71        |
| Figure S89. <sup>13</sup> C NMR (101 MHz) spectrum of the compound 16 in CDCl <sub>3</sub> (*= CDCl <sub>3</sub> ). .....                                                                                  | 71        |
| <b>HRMS spectra of all the compounds .....</b>                                                                                                                                                             | <b>72</b> |
| Compound 1.....                                                                                                                                                                                            | 72        |
| Figure S90. HRMS (ESI) spectrum of the compound 1. ....                                                                                                                                                    | 72        |

|                                                                                                                                                                                                                                                                                                                                                                                                                                                                                                                                                                                                                                                                                                                                                                        |           |
|------------------------------------------------------------------------------------------------------------------------------------------------------------------------------------------------------------------------------------------------------------------------------------------------------------------------------------------------------------------------------------------------------------------------------------------------------------------------------------------------------------------------------------------------------------------------------------------------------------------------------------------------------------------------------------------------------------------------------------------------------------------------|-----------|
| Compound 2b.....                                                                                                                                                                                                                                                                                                                                                                                                                                                                                                                                                                                                                                                                                                                                                       | 73        |
| Figure S91. HRMS (ESI) spectrum of the compound 2b. ....                                                                                                                                                                                                                                                                                                                                                                                                                                                                                                                                                                                                                                                                                                               | 73        |
| Compound 3.....                                                                                                                                                                                                                                                                                                                                                                                                                                                                                                                                                                                                                                                                                                                                                        | 74        |
| Figure S92. HRMS (ESI) spectrum of the compound 3. ....                                                                                                                                                                                                                                                                                                                                                                                                                                                                                                                                                                                                                                                                                                                | 74        |
| Compound 4a.....                                                                                                                                                                                                                                                                                                                                                                                                                                                                                                                                                                                                                                                                                                                                                       | 75        |
| Figure S93. HRMS (ESI) spectrum of the compound 4a.....                                                                                                                                                                                                                                                                                                                                                                                                                                                                                                                                                                                                                                                                                                                | 75        |
| Compound 8.....                                                                                                                                                                                                                                                                                                                                                                                                                                                                                                                                                                                                                                                                                                                                                        | 76        |
| Figure S94. HRMS (ESI) spectrum of the compound 8.....                                                                                                                                                                                                                                                                                                                                                                                                                                                                                                                                                                                                                                                                                                                 | 76        |
| Compound 9 and 9'.....                                                                                                                                                                                                                                                                                                                                                                                                                                                                                                                                                                                                                                                                                                                                                 | 77        |
| Figure S95. HRMS (ESI, Positive) spectrum of the compounds 9 and 9'.....                                                                                                                                                                                                                                                                                                                                                                                                                                                                                                                                                                                                                                                                                               | 77        |
| Compound 10.....                                                                                                                                                                                                                                                                                                                                                                                                                                                                                                                                                                                                                                                                                                                                                       | 78        |
| Figure S96. MS (MALDI-TOF) spectrum of the compound 10. ....                                                                                                                                                                                                                                                                                                                                                                                                                                                                                                                                                                                                                                                                                                           | 78        |
| Compound 11.....                                                                                                                                                                                                                                                                                                                                                                                                                                                                                                                                                                                                                                                                                                                                                       | 79        |
| Figure S97. HRMS (ESI, Positive) spectrum of the compound 11. ....                                                                                                                                                                                                                                                                                                                                                                                                                                                                                                                                                                                                                                                                                                     | 79        |
| Compound 12.....                                                                                                                                                                                                                                                                                                                                                                                                                                                                                                                                                                                                                                                                                                                                                       | 80        |
| Figure S98. HRMS (DART) spectrum of the compound 12.....                                                                                                                                                                                                                                                                                                                                                                                                                                                                                                                                                                                                                                                                                                               | 80        |
| Compound 13.....                                                                                                                                                                                                                                                                                                                                                                                                                                                                                                                                                                                                                                                                                                                                                       | 81        |
| Figure S99. HRMS (DART) spectrum of the compound 13.....                                                                                                                                                                                                                                                                                                                                                                                                                                                                                                                                                                                                                                                                                                               | 81        |
| Compound 14.....                                                                                                                                                                                                                                                                                                                                                                                                                                                                                                                                                                                                                                                                                                                                                       | 82        |
| Figure S100. HRMS (DART) spectrum of the compound 14.....                                                                                                                                                                                                                                                                                                                                                                                                                                                                                                                                                                                                                                                                                                              | 82        |
| Compound 15.....                                                                                                                                                                                                                                                                                                                                                                                                                                                                                                                                                                                                                                                                                                                                                       | 83        |
| Figure S101. HRMS (DART) spectrum of the compound 15.....                                                                                                                                                                                                                                                                                                                                                                                                                                                                                                                                                                                                                                                                                                              | 83        |
| Compound 16.....                                                                                                                                                                                                                                                                                                                                                                                                                                                                                                                                                                                                                                                                                                                                                       | 84        |
| Figure S102. HRMS (ESI, Positive) spectrum of the compound 16. ....                                                                                                                                                                                                                                                                                                                                                                                                                                                                                                                                                                                                                                                                                                    | 84        |
| <b>Experimental references .....</b>                                                                                                                                                                                                                                                                                                                                                                                                                                                                                                                                                                                                                                                                                                                                   | <b>85</b> |
| <b>Computational details.....</b>                                                                                                                                                                                                                                                                                                                                                                                                                                                                                                                                                                                                                                                                                                                                      | <b>86</b> |
| Table S1. TPSS-D3/def2-TZVP + COSMO computed imaginary frequency (ImF), zero-point energies (ZPE), gas-phase enthalpic (Hc) and Gibbs free-energy (Gc) corrections; the COSMO-RS computed solvation enthalpic (Hsol) and Gibbs free-energy (Gsol) corrections in CH <sub>2</sub> Cl <sub>2</sub> solution; TPSS-D3/def2-QZVP and PW6B95-D3/def2-QZVP single-point energies (TPSS-D3 and PW6B95-D3); the total PW6B95-D3 free energies G <sub>P</sub> ; the relative electronic energies (ΔE <sub>T</sub> and ΔE <sub>P</sub> ) and Gibbs energies (ΔG <sub>T</sub> and ΔG <sub>P</sub> ) at the TPSS-D3 and PW6B95-D3 levels. (group Ph = C <sub>6</sub> H <sub>5</sub> ; tBu = CMe <sub>3</sub> ; To = <i>o</i> -C <sub>6</sub> H <sub>5</sub> CH <sub>3</sub> )..... | 88        |
| Table S2. TPSS-D3/def2-TZVP + COSMO optimized Cartesian coordinates (in Å) in CH <sub>2</sub> Cl <sub>2</sub> solution. Each structure is labeled by a specific name (See Table S1), followed by the number of atoms, the total energy (in hartrees), and the detailed atomic coordinates (in double-column text list). ....                                                                                                                                                                                                                                                                                                                                                                                                                                           | 91        |
| Computational references .....                                                                                                                                                                                                                                                                                                                                                                                                                                                                                                                                                                                                                                                                                                                                         | 121       |

## Experimental

### General information for synthesis

Experiments were carried under inert conditions using standard Schlenk techniques or a glove box as appropriate. Dichloromethane (DCM, CH<sub>2</sub>Cl<sub>2</sub>), toluene (PhCH<sub>3</sub>) and *n*-hexanes (C<sub>6</sub>H<sub>14</sub>) were dispensed from an MBRAUN Solvent Purification System, deoxygenated by bubbling nitrogen for 20 min, and stored over 3 Å molecular sieves prior to use. Chloroform-d (CDCl<sub>3</sub>) and Acetonitrile-d<sub>3</sub> (CD<sub>3</sub>CN) solvents were used as received without any purification and those were stored over 4 Å molecular sieves prior to use. Vials and stir bar for reactions were oven-dried overnight before experiments. <sup>1</sup>H (400 MHz), <sup>19</sup>F (377 MHz), <sup>31</sup>P (162 MHz), <sup>11</sup>B (128 MHz) and <sup>13</sup>C{<sup>1</sup>H} (101 MHz) NMR spectra were run at 298 K on Bruker 400 spectrometer. The chemical shifts (δ, ppm) for <sup>1</sup>H and <sup>13</sup>C{<sup>1</sup>H} NMR spectra are given relative to solvent signals whereas an external reference standards used for <sup>19</sup>F (CFCl<sub>3</sub>), <sup>31</sup>P (85% H<sub>3</sub>PO<sub>4</sub>) and <sup>11</sup>B (BF<sub>3</sub>·OEt<sub>2</sub>) NMR spectra. These NMR data are given as: chemical shift, multiplicity (s = singlet, d = doublet, t = triplet, q = quartet, m = multiplet, br = broad), coupling constants (Hz) and integration. The single-crystal X-ray data were collected on a Bruker Kappa Apex II diffractometer which was equipped with rotation anode using graphite-monochromated MoKα radiation (λ = 0.71073 Å) at 150 K. Structures were solved and refined using Full-matrix least-squares based on *F*<sup>2</sup> with a suite of programs SHELXS and SHELXL<sup>1</sup> compiled in OLEX2.<sup>2</sup> High-resolution mass spectra (HRMS) were obtained on an AccuTOF Plus 4G (DART), Agilent 6538 UHD (ESI) or MALDI-TOF at AIMS Mass Spectrometry Laboratory whilst elemental (CHN) analysis was performed on Thermo Scientific Flash 2000 CHNS Analyzer at ANALEST Facility, University of Toronto. The cyclic voltammetry (CV) was performed with a three-electrode system, glassy carbon as working electrode whilst platinum wire as an auxiliary electrode and Ag/AgCl as a reference electrode. The experiments were performed with a 10<sup>-3</sup> M solution of sample in CH<sub>3</sub>CN/DCM (1:1) containing 0.1 M [(*n*-Bu)<sub>4</sub>N]PF<sub>6</sub> as supporting electrolyte with a scan rate 0.1 V/s. The reagents B(C<sub>6</sub>F<sub>5</sub>)<sub>3</sub>,<sup>3</sup> Et<sub>3</sub>SiB(C<sub>6</sub>F<sub>5</sub>)<sub>4</sub><sup>4</sup> and aryl(chloro)cyclopropenes<sup>5</sup> were prepared following

literature protocols. Notably, a general synthesis for aryl(chloro)cyclopropenes is added in the later section. All other reagents were purchased commercially and used as received.

## General synthesis for aryl(chloro)cyclopropenes<sup>5</sup>

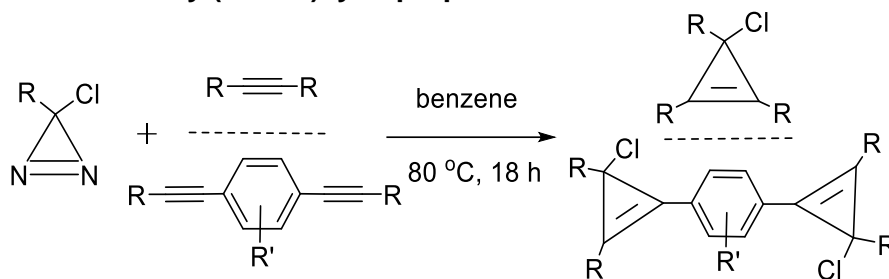

Into an 20 mL vial equipped with a stir bar, a suitable aryl(chloro)diazirine<sup>6</sup> (0.50 mmol, 1.0 equiv.) was taken in benzene (5.0 mL). A solution of an appropriate alkyne (0.50 mmol, 1.0 equiv.) in benzene (5.0 mL) was transferred to the vial. The reaction mixture was allowed to stir at 80 °C for 18 h. After removal of all volatiles, the residue was treated with minimum *n*-hexanes and dried again. The resultant materials were used directly without any further purification. Notably, the synthesis of aryl(chloro)cyclopropenes from pentafluorophenyl(chloro)diazirine, [(C<sub>6</sub>F<sub>5</sub>)C(N<sub>2</sub>)Cl]<sup>7</sup> with alkynes were performed in hexafluorobenzene (C<sub>6</sub>F<sub>6</sub>) instead of benzene and the resultant crude reaction mixtures were used directly for halide abstraction reactions.

## Synthetic procedures and characterization data

### Synthesis 1

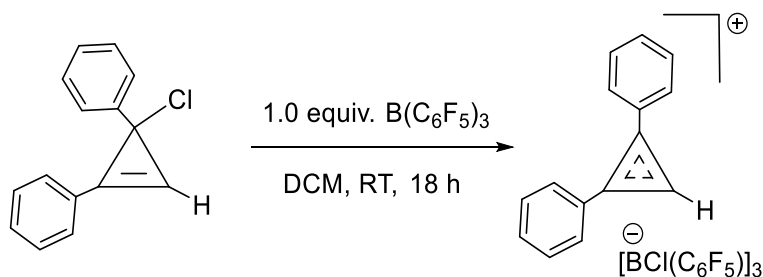

Into a 4 mL vial equipped with a stir bar, B(C<sub>6</sub>F<sub>5</sub>)<sub>3</sub> (51.1 mg, 0.10 mmol, 1.0 equiv.) was taken in DCM (0.5 mL). A solution of 1,2-bis(phenyl)-(1-chloro)-2-cyclopropene (22.7 mg, 0.10 mmol, 1.0 equiv.) in DCM (0.5 mL) was transferred to the vial. The reaction mixture was allowed to stir at RT for 18 h. After removal of all volatiles, the residue was washed with *n*-hexane (3 x 3 mL) and followed by drying afforded compound **1** (56.9 mg, 77%). X-ray quality crystals were grown with a mixture of solvent of DCM:*n*-hexane (1:5) and stored at -



30 °C for a week. **1**: C<sub>33</sub>H<sub>11</sub>BClF<sub>15</sub> requires: C 53.7, H 1.50. Found: C 53.6, H 1.42%. <sup>1</sup>H NMR (400 MHz, CDCl<sub>3</sub>): δ<sub>H</sub> 10.69 (br s, 1 H, (Ph<sub>2</sub>C)<sub>2</sub>CH), 8.34 (dt, *J* = 8.4, 1.4 Hz, 4 H, (Ph<sub>2</sub>C)<sub>2</sub>CH), 8.04 (tt, *J* = 7.5, 1.6 Hz, 2 H, (Ph<sub>2</sub>C)<sub>2</sub>CH), 7.94 - 7.70 (m, 4 H, (Ph<sub>2</sub>C)<sub>2</sub>CH); <sup>19</sup>F NMR (377 MHz, CDCl<sub>3</sub>): δ<sub>F</sub> -132.2 (m, 6 F, *o*-C<sub>6</sub>F<sub>5</sub> of -BCl(C<sub>6</sub>F<sub>5</sub>)<sub>3</sub>), -159.9 (m, 3 F, *p*-C<sub>6</sub>F<sub>5</sub> of -BCl(C<sub>6</sub>F<sub>5</sub>)<sub>3</sub>), -165.4 (m, 6 F, *m*-C<sub>6</sub>F<sub>5</sub> of -BCl(C<sub>6</sub>F<sub>5</sub>)<sub>3</sub>); <sup>11</sup>B NMR (128 MHz, CDCl<sub>3</sub>): δ<sub>B</sub> -5.9 (br s, 1 B, -BCl(C<sub>6</sub>F<sub>5</sub>)<sub>3</sub>); <sup>13</sup>C NMR (101 MHz, CDCl<sub>3</sub>): δ<sub>C</sub> 160.5 (br m, -C<sub>6</sub>F<sub>5</sub>), 149.2 (br s, -C<sub>6</sub>F<sub>5</sub>), 146.8 (br m, -C<sub>6</sub>F<sub>5</sub>), 140.4 (br m, -C<sub>6</sub>F<sub>5</sub>), 140.2 (s, C<sub>Ar</sub> of Ph), 138.0 (br m, -C<sub>6</sub>F<sub>5</sub>), 136.3 (s, C<sub>Ar</sub> of Ph), 135.6 (br m, -C<sub>6</sub>F<sub>5</sub>), 131.0 (s, C<sub>Ar</sub> of Ph), 127.8 (C=C of Ph<sub>2</sub>C<sub>3</sub>), 118.4 (s, C<sub>Ar</sub> of Ph); HRMS (ESI, Positive) *m/z*: 191.0862 for [M<sup>+</sup>] (calcd.: 191.0855 for C<sub>15</sub>H<sub>11</sub><sup>+</sup>).

### Synthesis 2a

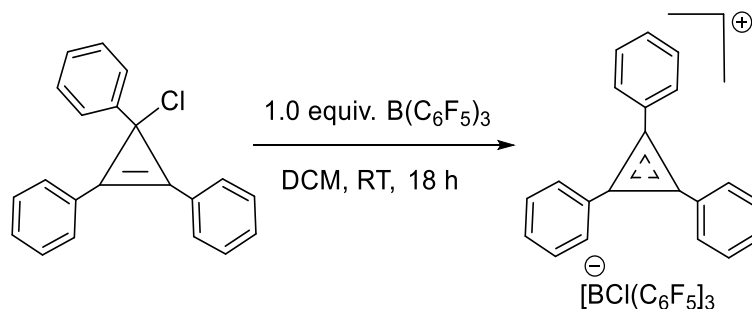

**2a** was prepared by following the protocol for **1** whereas 1,2,3-tris(phenyl)-(1-chloro)-2-cyclopropene (30.2 mg, 0.10 mmol, 1.0 equiv.) was used. After removal of all volatiles, the residue was washed with *n*-hexane (3 x 3 mL) and followed by crystallization with a mixture of solvent of DCM:*n*-hexane (1:5) and stored at -30 °C for three days afforded compound **2a** (71 mg, 87%). **2a**: <sup>1</sup>H NMR (400 MHz, CDCl<sub>3</sub>): δ<sub>H</sub> 8.56 - 8.34 (m, 6 H, ArH), 8.01 (tt, *J* = 7.1, 1.7 Hz, 3 H, ArH), 7.92 - 7.78 (m, 6 H, ArH); <sup>19</sup>F NMR (377 MHz, CDCl<sub>3</sub>): δ<sub>F</sub> -132.1 (m, 6 F, *o*-C<sub>6</sub>F<sub>5</sub> of -BCl(C<sub>6</sub>F<sub>5</sub>)<sub>3</sub>), -161.7 (m, 3 F, *p*-C<sub>6</sub>F<sub>5</sub> of -BCl(C<sub>6</sub>F<sub>5</sub>)<sub>3</sub>), -166.5 (m, 6 F, *m*-C<sub>6</sub>F<sub>5</sub> of -BCl(C<sub>6</sub>F<sub>5</sub>)<sub>3</sub>); <sup>11</sup>B NMR (128 MHz, CDCl<sub>3</sub>): δ<sub>B</sub> -7.2 (br s, 1 B, -BCl(C<sub>6</sub>F<sub>5</sub>)<sub>3</sub>); <sup>13</sup>C NMR (101 MHz, CDCl<sub>3</sub>): δ<sub>C</sub> 154.9 (s, Ph<sub>3</sub>C<sup>+</sup>), 149.1 (br m, -C<sub>6</sub>F<sub>5</sub>), 146.8 (br m, -C<sub>6</sub>F<sub>5</sub>), 141.4 (br m, -C<sub>6</sub>F<sub>5</sub>), 139.8 (br m, -C<sub>6</sub>F<sub>5</sub>), 138.9 (s, C<sub>Ar</sub> of Ph), 135.3 (s, C<sub>Ar</sub> of Ph), 130.9 (s, C<sub>Ar</sub> of Ph), 119.6 (s, C<sub>Ar</sub> of Ph).

### Synthesis 2b

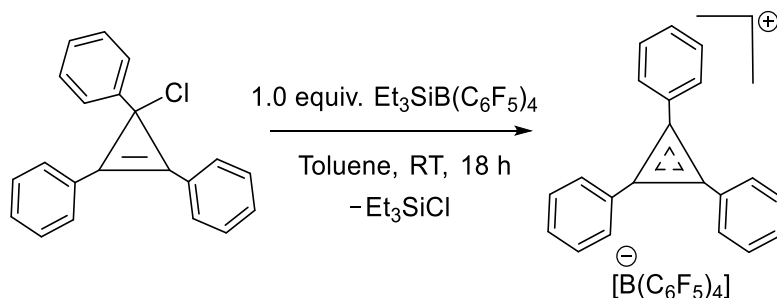

**2b** was prepared by following the protocol for **1** whereas 1,2,3-(trisphenyl)-(1-chloro)-2-cyclopropene (30.2 mg, 0.10 mmol, 1.0 equiv.),  $\text{Et}_3\text{Si}[\text{B}(\text{C}_6\text{F}_5)_4]$  (79.0 mg, 0.10 mmol, 1.0 equiv.) were used and the reaction was carried out in toluene (2.0 mL). After stirring at RT for 18 h, the toluene layer was pipetted out. The oily residue was washed with *n*-hexane (3 x 3 mL) followed by crystallization with a mixture of solvent of DCM:*n*-hexane (1:5) and stored at  $-30\text{ }^\circ\text{C}$  for three days afforded compound **2b** (86 mg, 91%). **2b**:  $\text{C}_{45}\text{H}_{15}\text{BF}_{20}$  requires: C 57.1, H 1.60. Found: C 57.5, H 1.38%.  $^1\text{H}$  NMR (400 MHz,  $\text{CDCl}_3$ ):  $\delta_{\text{H}}$  8.50 - 8.33 (m, 6 H, ArH), 8.03 (tt,  $J = 7.4, 1.8$  Hz, 3 H, ArH), 7.93 - 7.80 (m, 6 H, ArH);  $^{19}\text{F}$  NMR (377 MHz,  $\text{CDCl}_3$ ):  $\delta_{\text{F}}$  -132.5 (m, 6 F, *o*- $\text{C}_6\text{F}_5$  of  $-\text{BArF}_{20}$ ), -162.8 (m, 3 F, *p*- $\text{C}_6\text{F}_5$  of  $-\text{BArF}_{20}$ ), -166.7 (m, 6 F, *m*- $\text{C}_6\text{F}_5$  of  $-\text{BArF}_{20}$ );  $^{11}\text{B}$  NMR (128 MHz,  $\text{CDCl}_3$ ):  $\delta_{\text{B}}$  -16.8 (br s, 1 B,  $-\text{BArF}_{20}$ );  $^{13}\text{C}$  NMR (101 MHz,  $\text{CDCl}_3$ ):  $\delta_{\text{C}}$  155.4 (s,  $\text{Ph}_3\text{C}_3^+$ ), 149.7 (br m,  $-\text{C}_6\text{F}_5$ ), 147.3 (br m,  $-\text{C}_6\text{F}_5$ ), 139.8 (s,  $\text{C}_{\text{Ar}}$  of Ph), 139.6 (br m,  $-\text{C}_6\text{F}_5$ ), 137.8 (br m,  $-\text{C}_6\text{F}_5$ ), 137.3 (br s,  $-\text{C}_6\text{F}_5$ ), 135.6 (s,  $\text{C}_{\text{Ar}}$  of Ph), 135.4 (br m,  $-\text{C}_6\text{F}_5$ ), 131.5 (s,  $\text{C}_{\text{Ar}}$  of Ph), 119.6 (s,  $\text{C}_{\text{Ar}}$  of Ph); HRMS (ESI, Positive)  $m/z$ : 267.1176 for  $[\text{M}^+]$  (calcd.: 267.1168 for  $\text{C}_{21}\text{H}_{15}^+$ ).

### Synthesis 2c

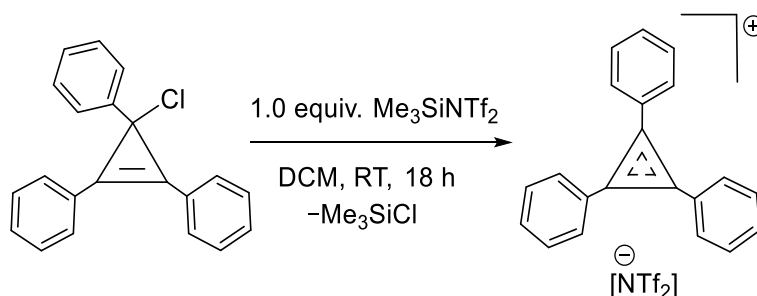

**2c** was prepared by following the protocol for **1** whereas 1,2,3-(trisphenyl)-(1-chloro)-2-cyclopropene (30.2 mg, 0.10 mmol, 1.0 equiv.),  $\text{Me}_3\text{SiNTf}_2$  (35.3 mg, 0.10 mmol, 1.0 equiv.)

were used. After removal of all volatiles, the residue was washed with *n*-hexane (3 x 3 mL) and followed by crystallization with a mixture of solvent of DCM:*n*-hexane (1:5) and stored at -30 °C for three days afforded compound **2c** (43 mg, 76%). **2c**:  $^1\text{H}$  NMR (400 MHz,  $\text{CDCl}_3$ ):  $\delta_{\text{H}}$  8.56 - 8.42 (m, 6 H, *ArH*), 8.02 (tt,  $J = 7.4, 1.6$  Hz, 3 H, *ArH*), 7.96 - 7.83 (m, 6 H, *ArH*);  $^{19}\text{F}$  NMR (377 MHz,  $\text{CDCl}_3$ ):  $\delta_{\text{F}}$  -79.1 (s, 6 F,  $\text{NTf}_2$ );  $^{13}\text{C}$  NMR (101 MHz,  $\text{CDCl}_3$ ):  $\delta_{\text{C}}$  155.7 (s,  $\text{Ph}_3\text{C}_3^+$ ), 139.3 (s,  $\text{C}_{\text{Ar}}$  of Ph), 135.9 (s,  $\text{C}_{\text{Ar}}$  of Ph), 131.2 (s,  $\text{C}_{\text{Ar}}$  of Ph), 120.1 (q,  $J = 322$  Hz,  $\text{CF}_3$  of  $\text{NTf}_2$ ), 120.0 (s,  $\text{C}_{\text{Ar}}$  of Ph).

### Synthesis 3

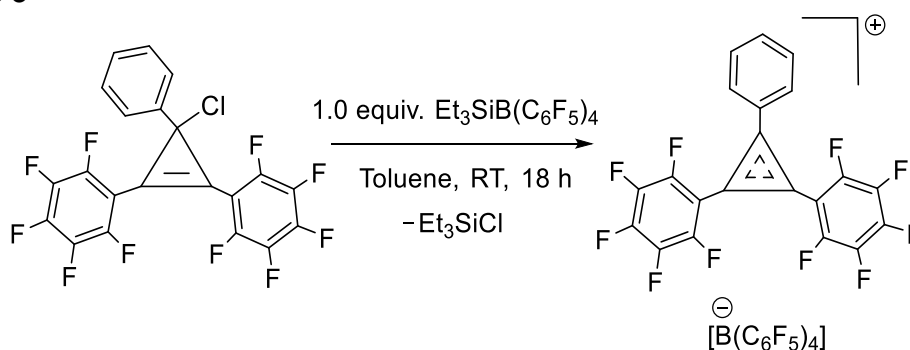

**3** was prepared by following the protocol for **1** whereas 1-(phenyl)-2,3-bis(pentafluorophenyl)-(1-chloro)-2-cyclopropene (48.3 mg, 0.10 mmol, 1.0 equiv.),  $\text{Et}_3\text{Si}[\text{B}(\text{C}_6\text{F}_5)_4]$  (79.0 mg, 0.10 mmol, 1.0 equiv.) were taken and the reaction was in toluene (2.0 mL). After stirring at RT for 18 h, the toluene layer was pipetted out. The residue was washed with *n*-hexane (3 x 3 mL) followed by drying afforded brownish-yellow powder compound **3** (103 mg, 91%). X-ray quality crystals were grown with the mixture of solvents using DCM: $\text{CH}_3\text{CN}$ :*n*-hexanes (1:1:5) and -30 °C for seven days. **3**:  $\text{C}_{45}\text{H}_5\text{BF}_{30}$  requires: C 48.0, H 0.45. Found: C 51.2, H 1.01%.  $^1\text{H}$  NMR (400 MHz,  $\text{CD}_3\text{CN}$ ):  $\delta_{\text{H}}$  8.51 (d,  $J = 7.6$  Hz, 2 H, *Ar-H*), 8.15 (tt,  $J = 7.5, 1.3$  Hz, 1 H, *Ar-H*), 7.99 - 7.88 (m, 2 H, *Ar-H*);  $^{19}\text{F}$  NMR (377 MHz,  $\text{CD}_3\text{CN}$ ):  $\delta_{\text{F}}$  -128.4 (m, 4 F, *o*- $\text{C}_6\text{F}_5$  of  $-\text{C}_3(\text{C}_6\text{F}_5)_2\text{Ph}$ ), -133.8 (m, 8 F, *o*- $\text{C}_6\text{F}_5$  of  $-\text{B}(\text{C}_6\text{F}_5)_4$ ), -134.9 (m, 2 F, *p*- $\text{C}_6\text{F}_5$  of  $-\text{C}_3(\text{C}_6\text{F}_5)_2\text{Ph}$ ), -159.0 (m, 4 F, *m*- $\text{C}_6\text{F}_5$  of  $-\text{C}_3(\text{C}_6\text{F}_5)_2\text{Ph}$ ), -164.0 (m, 4 F, *p*- $\text{C}_6\text{F}_5$  of  $-\text{B}(\text{C}_6\text{F}_5)_4$ ), -168.4 (m, 8 F, *m*- $\text{C}_6\text{F}_5$  of  $-\text{B}(\text{C}_6\text{F}_5)_4$ );  $^{11}\text{B}$  NMR (128 MHz,  $\text{CD}_3\text{CN}$ ):  $\delta_{\text{B}}$  -16.7 (br s, 2 B,  $-\text{B}(\text{C}_6\text{F}_5)_4$ );  $^{13}\text{C}$  NMR (101 MHz,  $\text{CD}_3\text{CN}$ ):  $\delta_{\text{C}}$  158.4 (s,  $(\text{C}_6\text{F}_5)_2\text{PhC}_3^+$ ), 150.2 (br m,  $-\text{C}_6\text{F}_5$ ), 147.8 (br m,  $-\text{C}_6\text{F}_5$ ), 147.5 (br m,  $-\text{C}_6\text{F}_5$ ), 142.0 (s,  $\text{C}_{\text{Ar}}$  of

Ph), 141.0 (br m,  $-\text{C}_6\text{F}_5$ ), 140.5 (br m,  $-\text{C}_6\text{F}_5$ ), 138.6 (br m,  $-\text{C}_6\text{F}_5$ ), 138.2 (s,  $\text{C}_{\text{Ar}}$  of Ph), 138.1 (br m,  $-\text{C}_6\text{F}_5$ ), 136.1 (br m,  $-\text{C}_6\text{F}_5$ ), 131.9 ( $\text{C}_{\text{Ar}}$  of Ph), 119.3 ( $\text{C}_{\text{Ar}}$  of Ph); HRMS (ESI, Positive)  $m/z$ : 447.0236 for  $[\text{M}^+]$  (calcd.: 447.0226 for  $\text{C}_{21}\text{H}_5\text{F}_{10}^+$ ).

### Synthesis 4a

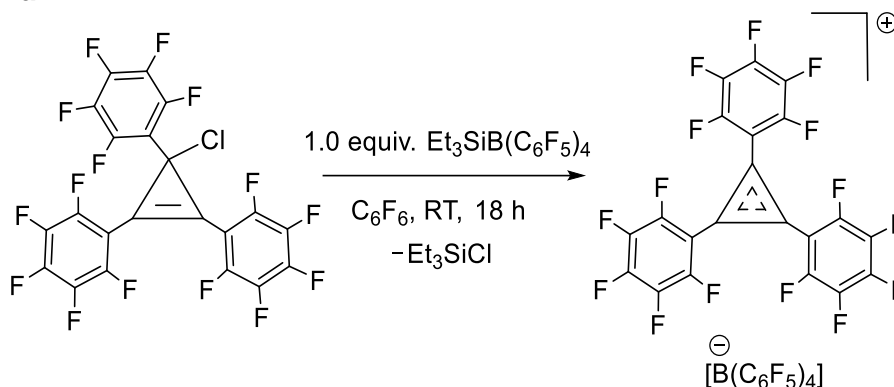

**4a** was prepared by following the protocol for **1** whereas 1,2,3-(tris(pentafluorophenyl)-(1-chloro)-2-cyclopropene (57.3 mg, 0.10 mmol, 1.0 equiv.),  $\text{Et}_3\text{Si}[\text{B}(\text{C}_6\text{F}_5)_4]$  (79.0 mg, 0.10 mmol, 1.0 equiv.) were taken and the reaction was in  $\text{C}_6\text{F}_6$  (2.0 mL). After stirring at RT for 18 h, the  $\text{C}_6\text{F}_6$  layer was pipetted out. The residue was washed with *n*-hexane (3 x 3 mL) followed by drying afforded compound **4a** (106 mg, 87%). X-ray quality crystals were grown with the mixture of solvents using  $\text{DCM}:\text{CH}_3\text{CN}:\textit{n}$ -hexanes (1:1:5) and left at  $-30\text{ }^\circ\text{C}$  for a week. **4a**:  $\text{C}_{45}\text{BF}_{35}$  requires: C 44.4. Found: C 44.0%.  $^{19}\text{F}$  NMR (377 MHz,  $\text{CD}_3\text{CN}$ ):  $\delta_{\text{F}}$  -126.8 (m, 4 F, *o*- $\text{C}_6\text{F}_5$  of  $-\text{C}_3(\text{C}_6\text{F}_5)_3$ ), -128.2 (m, 2 F, *o*- $\text{C}_6\text{F}_5$  of  $-\text{C}_3(\text{C}_6\text{F}_5)_3$ ), -133.3 (m, 8 F, *o*- $\text{C}_6\text{F}_5$  of  $-\text{B}(\text{C}_6\text{F}_5)_4$ ), -139.4 (m, 2 F, *p*- $\text{C}_6\text{F}_5$  of  $-\text{C}_3(\text{C}_6\text{F}_5)_3$ ), -149.5 (m, 1 F, *p*- $\text{C}_6\text{F}_5$  of  $-\text{C}_3(\text{C}_6\text{F}_5)_3$ ), -155.8 (m, 4 F, *m*- $\text{C}_6\text{F}_5$  of  $-\text{C}_3(\text{C}_6\text{F}_5)_3$ ), -161.1 (m, 2 F, *m*- $\text{C}_6\text{F}_5$  of  $-\text{C}_3(\text{C}_6\text{F}_5)_3$ ), -163.8 (m, 4 F, *p*- $\text{C}_6\text{F}_5$  of  $-\text{B}(\text{C}_6\text{F}_5)_4$ ), -167.8 (m, 8 F, *m*- $\text{C}_6\text{F}_5$  of  $-\text{B}(\text{C}_6\text{F}_5)_4$ );  $^{11}\text{B}$  NMR (128 MHz,  $\text{CD}_3\text{CN}$ ):  $\delta_{\text{B}}$  -16.7 (br s, 2 B,  $-\text{B}(\text{C}_6\text{F}_5)_4$ );  $^{13}\text{C}$  NMR (101 MHz,  $\text{CD}_3\text{CN}$ ):  $\delta_{\text{C}}$  Not resolved C for  $(\text{C}_6\text{F}_5)_3\text{C}_3^+$ , 149.0 (br m,  $-\text{C}_6\text{F}_5$ ), 148.3 (br m,  $-\text{C}_6\text{F}_5$ ), 146.8 (br m,  $-\text{C}_6\text{F}_5$ ), 140.0 (br m,  $-\text{C}_6\text{F}_5$ ), 139.2 (br m,  $-\text{C}_6\text{F}_5$ ), 137.3 (br m,  $-\text{C}_6\text{F}_5$ ), 136.8 (br m,  $-\text{C}_6\text{F}_5$ ), 134.8 (br m,  $-\text{C}_6\text{F}_5$ ). HRMS (ESI, Positive)  $m/z$ : 536.9769 ( $\text{M}^+$ ) (calcd.: 536.9755 for  $\text{C}_{21}\text{F}_{15}^+$ ).

## Synthesis 4b

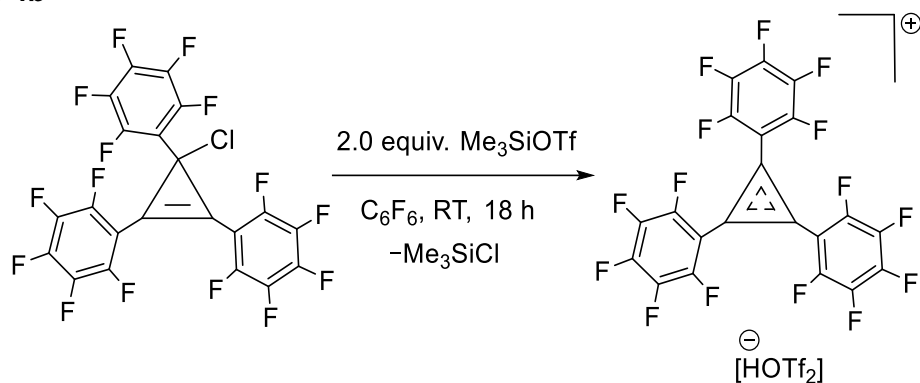

**4b** (67 mg, 76%) was prepared by following the protocol for **4a** whereas  $\text{Me}_3\text{SiOTf}$  (44.4 mg, 0.2 mmol, 2 equiv.) was employed. X-ray suitable crystals were grown with the mixture of solvents using  $\text{DCM}:\text{CH}_3\text{CN}:\textit{n}$ -hexanes (1:1:5) and left at  $-30\text{ }^\circ\text{C}$  for a week. This batch of reaction was meant to be for better quality X-ray crystals, hence partial characterization data included here. **4b**:  $^1\text{H}$  NMR (400 MHz,  $\text{CD}_3\text{CN}$ ):  $\delta_{\text{H}}$  7.32 (br s, 1 H,  $[\text{HOTf}_2]$ );  $^{19}\text{F}$  NMR (377 MHz,  $\text{CD}_3\text{CN}$ ):  $\delta_{\text{F}}$  -79.5 (m, 6 F,  $-\text{CF}_3$  of  $[\text{HOTf}_2]$ ), -138.2 (m, 4 F,  $o\text{-C}_6\text{F}_5$  of  $-\text{C}_3(\text{C}_6\text{F}_5)_3$ ), -143.3 (m, 2 F,  $o\text{-C}_6\text{F}_5$  of  $\text{C}_3(\text{C}_6\text{F}_5)_3^+$ ), -151.5 (m, 2 F,  $p\text{-C}_6\text{F}_5$  of  $\text{C}_3(\text{C}_6\text{F}_5)_3^+$ ), -157.7 (m, 1 F,  $p\text{-C}_6\text{F}_5$  of  $\text{C}_3(\text{C}_6\text{F}_5)_3^+$ ), -163.2 (m, 4 F,  $m\text{-C}_6\text{F}_5$  of  $-\text{C}_3(\text{C}_6\text{F}_5)_3$ ), -164.7 (m, 2 F,  $m\text{-C}_6\text{F}_5$  of  $-\text{C}_3(\text{C}_6\text{F}_5)_3$ ).

## Synthesis 5

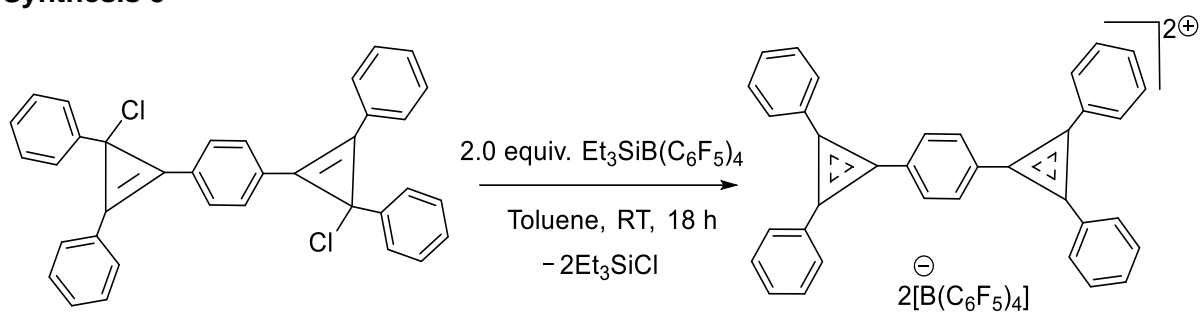

**5** was prepared by following the protocol for **1** whereas 1,4-bis(3-chloro-2,3-diphenyl-1-cyclopropene)-benzene (52.8 mg, 0.10 mmol, 1.0 equiv.),  $\text{Et}_3\text{Si}[\text{B}(\text{C}_6\text{F}_5)_4]$  (158.0 mg, 0.20 mmol, 2.0 equiv.) were employed in toluene (4.0 mL). After stirring at RT for 18 h, the toluene layer was pipetted out. The residue was washed with *n*-hexane (3 x 3 mL) followed by drying afforded yellow powder compound **5** (158 mg, 87%). X-ray quality crystals were grown with the mixture of solvents using  $\text{DCM}:\text{CH}_3\text{CN}:\textit{n}$ -hexanes (1:1:5) at RT for a week. **5**:

$^1\text{H}$  NMR (400 MHz,  $\text{CD}_3\text{CN}$ ):  $\delta_{\text{H}}$  8.87 (s, 4 H, Ar-*H*), 8.63 (dt,  $J = 7.7, 1.5$  Hz, 8 H, Ar-*H*), 8.12 (tt,  $J = 7.6, 1.7$  Hz, 4 H, Ar-*H*), 8.02 - 7.87 (m, 8 H, Ar-*H*);  $^{19}\text{F}$  NMR (377 MHz,  $\text{CD}_3\text{CN}$ ):  $\delta_{\text{F}}$  -133.7 (m, 16 F, *o*- $\text{C}_6\text{F}_5$  of  $-\text{B}(\text{C}_6\text{F}_5)_4$ ), -163.8 (m, 8 F, *p*- $\text{C}_6\text{F}_5$  of  $-\text{B}(\text{C}_6\text{F}_5)_4$ ), -168.4 (m, 16 F, *m*- $\text{C}_6\text{F}_5$  of  $-\text{B}(\text{C}_6\text{F}_5)_4$ );  $^{11}\text{B}$  NMR (128 MHz,  $\text{CD}_3\text{CN}$ ):  $\delta_{\text{B}}$  -16.7 (br s, 2 B,  $-\text{B}(\text{C}_6\text{F}_5)_4$ );  $^{13}\text{C}$  NMR (101 MHz,  $\text{CD}_3\text{CN}$ ):  $\delta_{\text{C}}$  Not resolved C for  $(\text{Ar}_3\text{C}_3)^+$ , 150.3 (br m,  $-\text{C}_6\text{F}_5$ ), 147.9 (br m,  $-\text{C}_6\text{F}_5$ ), 140.5 (br m,  $-\text{C}_6\text{F}_5$ ), 140.2 (s,  $\text{C}_{\text{Ar}}$  of Ph), 138.6 (br m,  $-\text{C}_6\text{F}_5$ ), 137.3 (s,  $\text{C}_{\text{Ar}}$  of Ph), 136.7 (s,  $\text{C}_{\text{Ar}}$  of Ph), 131.6 (s,  $\text{C}_{\text{Ar}}$  of Ph), 130.0 (s,  $\text{C}_{\text{Ar}}$  of Ph), 129.2 (s,  $\text{C}_{\text{Ar}}$  of Ph), 126.3 (s,  $\text{C}_{\text{Ar}}$  of Ph), 121.0 ( $\text{C}_{\text{Ar}}$  of Ph). Efforts to obtain EA or HRMS data for this highly Lewis acidic dication were unsuccessful. Nonetheless, full characterization of subsequent reaction products are reported (*vide infra*).

### Synthesis 6

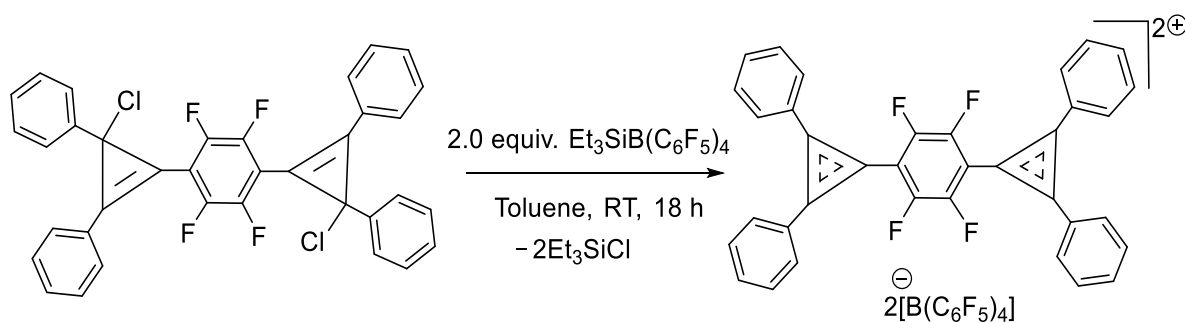

**6** was prepared by following the protocol for **1** whereas 1,4-bis(3-chloro-2,3-diphenyl-1-cyclopropene)-2,3,5,6-tetrafluorobenzene (59.9 mg, 0.10 mmol, 1.0 equiv.),  $\text{Et}_3\text{Si}[\text{B}(\text{C}_6\text{F}_5)_4]$  (158.0 mg, 0.20 mmol, 2.0 equiv.) were employed in toluene (4.0 mL). After stirring at RT for 18 h, the toluene layer was pipetted out. The residue was washed with *n*-hexane (3 x 3 mL) followed by drying afforded yellow powder compound **6** (168 mg, 89%). X-ray quality crystals were grown with the mixture of solvents using  $\text{DCM}:\text{CH}_3\text{CN}:\textit{n}$ -hexanes (1:1:5) at RT for a week. **6**:  $\text{C}_{84}\text{H}_{20}\text{B}_2\text{F}_{44}$  requires: C 53.5, H 1.07. Found: C 53.4, H 1.68%.  $^1\text{H}$  NMR (400 MHz,  $\text{CD}_3\text{CN}$ ):  $\delta_{\text{H}}$  8.65 (dt,  $J = 8.3, 1.8$  Hz, 8 H, Ar-*H*), 8.17 (tt,  $J = 7.7, 1.5$  Hz, 4 H, Ar-*H*), 8.05 - 7.92 (m, 8 H, Ar-*H*);  $^{19}\text{F}$  NMR (377 MHz,  $\text{CD}_3\text{CN}$ ):  $\delta_{\text{F}}$  -126.6 (s, 4 F,  $\text{C}_6\text{F}_4$ ), -133.8 (m, 16 F, *o*- $\text{C}_6\text{F}_5$  of  $-\text{B}(\text{C}_6\text{F}_5)_4$ ), -163.9 (m, 8 F, *p*- $\text{C}_6\text{F}_5$  of  $-\text{B}(\text{C}_6\text{F}_5)_4$ ), -168.3 (m, 16 F, *m*- $\text{C}_6\text{F}_5$  of  $-\text{B}(\text{C}_6\text{F}_5)_4$ );  $^{11}\text{B}$  NMR (128 MHz,  $\text{CD}_3\text{CN}$ ):  $\delta_{\text{B}}$  -16.7 (br s, 2 B,  $-\text{B}(\text{C}_6\text{F}_5)_4$ );  $^{13}\text{C}$  NMR (101 MHz,

CD<sub>3</sub>CN):  $\delta_C$  160.1 (s, Ar<sub>3</sub>C<sub>3</sub>)<sup>+</sup>, 150.4 (br m, -C<sub>6</sub>F<sub>5</sub>), 148.0 (br m, -C<sub>6</sub>F<sub>5</sub>), 141.5 (s, C<sub>Ar</sub> of Ph), 140.6 (br m, -C<sub>6</sub>F<sub>5</sub>), 138.6 (br m, -C<sub>6</sub>F<sub>5</sub>), 138.1 (s, C<sub>Ar</sub> of Ph), 136.1 (br m, -C<sub>6</sub>F<sub>4</sub>-), 131.9 (s, C<sub>Ar</sub> of Ph), 120.2 (C<sub>Ar</sub> of Ph). Efforts to obtain EA or HRMS data for this highly Lewis acidic dication were unsuccessful. Nonetheless, full characterization of subsequent reaction products are reported (*vide infra*).

### Synthesis 7

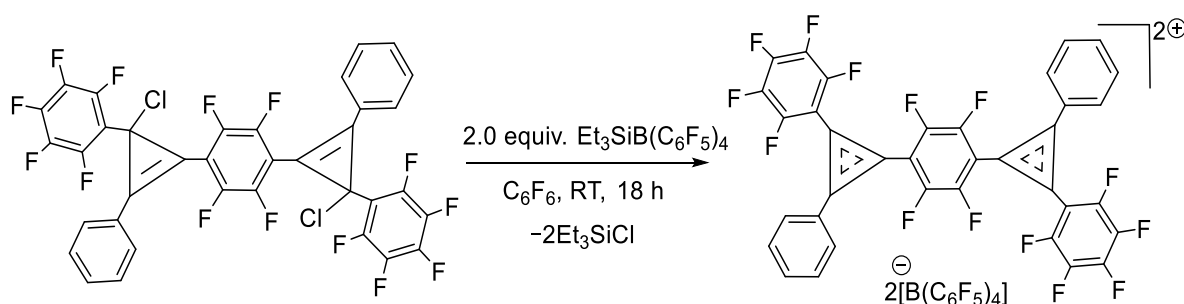

**7** was prepared by following the protocol for **1** whereas 1,4-bis(3-chloro-2-phenyl-3-pentafluorophenyl-1-cyclopropene)-2,3,5,6-tetrafluorobenzene (77.9 mg, 0.10 mmol, 1.0 equiv.), Et<sub>3</sub>Si[B(C<sub>6</sub>F<sub>5</sub>)<sub>4</sub>] (158.0 mg, 0.20 mmol, 2.0 equiv.) were employed in C<sub>6</sub>F<sub>6</sub> (4.0 mL). After stirring at RT for 18 h, the C<sub>6</sub>F<sub>6</sub> layer was pipetted out. The residue was washed with *n*-hexane (3 x 3 mL) followed by drying afforded dark-brown powder compound **7** (161 mg, 78%). Crystals were grown with the mixture of solvents using DCM:PhCN:*n*-hexanes (1:1:5) at RT for a week and data was not publishable quality but confirms the molecular architecture. **7**: <sup>1</sup>H NMR (400 MHz, CD<sub>3</sub>CN):  $\delta_H$  8.62 (dt, *J* = 8.3, 1.1 Hz, 4 H, Ar-*H*), 8.23 (tt, *J* = 7.6, 1.1 Hz, 2 H, Ar-*H*), 8.06 - 7.94 (m, 4 H, Ar-*H*); <sup>19</sup>F NMR (377 MHz, CD<sub>3</sub>CN):  $\delta_F$  -126.9 (s, 4 F, -C<sub>6</sub>F<sub>4</sub>-), -132.1 (m, 4 F, *o*-C<sub>6</sub>F<sub>5</sub> of -(C<sub>6</sub>F<sub>5</sub>)PhC<sub>3</sub>)<sup>+</sup>, -133.8 (m, 16 F, *o*-C<sub>6</sub>F<sub>5</sub> of -B(C<sub>6</sub>F<sub>5</sub>)<sub>4</sub>), -141.1 (m, 2 F, *p*-C<sub>6</sub>F<sub>5</sub> of -(C<sub>6</sub>F<sub>5</sub>)PhC<sub>3</sub>)<sup>+</sup>, -158.5 (m, 4 F, *m*-C<sub>6</sub>F<sub>5</sub> of -(C<sub>6</sub>F<sub>5</sub>)PhC<sub>3</sub>)<sup>+</sup>, -164.0 (m, 8 F, *p*-C<sub>6</sub>F<sub>5</sub> of -B(C<sub>6</sub>F<sub>5</sub>)<sub>4</sub>), -168.4 (m, 16 F, *m*-C<sub>6</sub>F<sub>5</sub> of -B(C<sub>6</sub>F<sub>5</sub>)<sub>4</sub>); <sup>11</sup>B NMR (128 MHz, CD<sub>3</sub>CN):  $\delta_B$  -16.7 (br s, 2 B, -B(C<sub>6</sub>F<sub>5</sub>)<sub>4</sub>); <sup>13</sup>C NMR (101 MHz, CD<sub>3</sub>CN):  $\delta_C$  159.9 (s, Ar<sub>3</sub>C<sub>3</sub>)<sup>+</sup>, 150.2 (br m, -C<sub>6</sub>F<sub>5</sub>), 147.9 (br m, -C<sub>6</sub>F<sub>5</sub>), 146.6 (br m, -C<sub>6</sub>F<sub>5</sub>), 146.2 (br m, -C<sub>6</sub>F<sub>5</sub>), 143.0 (s, C<sub>Ar</sub> of Ph), 140.6 (br m, -C<sub>6</sub>F<sub>5</sub>), 139.1 (s, C<sub>Ar</sub> of Ph), 138.6 (br m, -C<sub>6</sub>F<sub>5</sub>), 138.6 (br m, -C<sub>6</sub>F<sub>5</sub>), 136.1 (br m, -C<sub>6</sub>F<sub>4</sub>-), 131.8 (s, C<sub>Ar</sub> of Ph), 119.1 (C<sub>Ar</sub> of Ph). Efforts to

obtain EA or HRMS data for this highly Lewis acidic dication were unsuccessful. Nonetheless, full characterization of subsequent reaction products are reported (*vide infra*).

### Synthesis 8

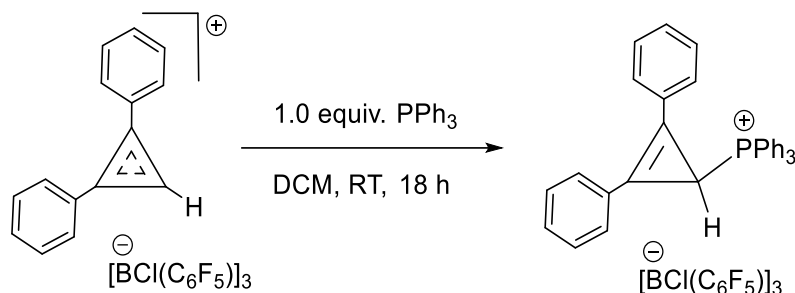

Into a 4 mL vial equipped with a stir bar,  $[(\text{Ph}_2\text{C})_2\text{CH}][\text{ClB}(\text{C}_6\text{F}_5)_3]$ , **1** (36.9 mg, 0.05 mmol, 1.0 equiv.) was taken in DCM (0.5 mL). A solution of  $\text{PPh}_3$  (15.7 mg, 0.06 mmol, 1.1 equiv.) in DCM (0.5 mL) was transferred to the vial. The reaction mixture was allowed to stir at RT for 18 h. After removal of all volatiles, the residue was washed with *n*-hexane (3 x 1 mL) and followed by drying afforded compound **8** (48.0 mg, 96%). X-ray quality crystals were grown with a mixture of solvent of DCM:*n*-hexane (1:5) at RT for a week. **8**:  $\text{C}_{51}\text{H}_{26}\text{BClF}_{14}\text{P}\cdot\text{CH}_2\text{Cl}_2$  requires: C 57.5, H 2.60. Found: C 57.6, H 2.07%.  $^1\text{H}$  NMR (400 MHz,  $\text{CDCl}_3$ ):  $\delta_{\text{H}}$  7.83 - 7.72 (m, 3 H, Ar-H), 7.78 - 7.54 (m, 12 H, Ar-H), 7.43 - 7.30 (m, 10 H, Ar-H), 3.77 (d,  $^1J_{\text{H-P}} = 48$  Hz, 1 H,  $(\text{Ph}_2\text{C})_2\text{CH-PPh}_3$ );  $^{31}\text{P}$  NMR (162 MHz,  $\text{CDCl}_3$ ):  $\delta_{\text{P}}$  22.5 (d,  $^1J_{\text{P-H}} = 48$  Hz, 1 P,  $(\text{Ph}_2\text{C})_2\text{CH-PPh}_3$ );  $^{31}\text{P}\{^1\text{H}\}$  NMR (162 MHz,  $\text{CDCl}_3$ ):  $\delta_{\text{P}}$  22.5 (s, 1 P,  $(\text{Ph}_2\text{C})_2\text{CH-PPh}_3$ );  $^{19}\text{F}$  NMR (377 MHz,  $\text{CDCl}_3$ ):  $\delta_{\text{F}}$  -132.0 (m, 6 F, *o*- $\text{C}_6\text{F}_5$  of  $-\text{BCl}(\text{C}_6\text{F}_5)_3$ ), -161.6 (m, 3 F, *p*- $\text{C}_6\text{F}_5$  of  $-\text{BCl}(\text{C}_6\text{F}_5)_3$ ), -166.4 (m, 6 F, *m*- $\text{C}_6\text{F}_5$  of  $-\text{BCl}(\text{C}_6\text{F}_5)_3$ );  $^{11}\text{B}$  NMR (128 MHz,  $\text{CDCl}_3$ ):  $\delta_{\text{B}}$  -6.9 (br s, 1 B,  $-\text{BCl}(\text{C}_6\text{F}_5)_3$ );  $^{13}\text{C}$  NMR (101 MHz,  $\text{CDCl}_3$ ):  $\delta_{\text{C}}$  149.5 (br m,  $-\text{C}_6\text{F}_5$ ), 147.0 (br m,  $-\text{C}_6\text{F}_5$ ), 140.1 (br m,  $-\text{C}_6\text{F}_5$ ), 137.8 (br m,  $-\text{C}_6\text{F}_5$ ), 135.4 (d,  $J_{\text{C-P}} = 3.3$  Hz,  $\text{C}_{\text{Ar}}$ ), 134.4 (br m,  $-\text{C}_6\text{F}_5$ ), 133.6 (d,  $J_{\text{C-P}} = 9.9$  Hz,  $\text{C}_{\text{Ar}}$ ), 131.1 (s,  $\text{C}_{\text{Ar}}$ ), 130.5 (d,  $J_{\text{C-P}} = 11.6$  Hz,  $\text{C}_{\text{Ar}}$ ), 129.4 (d,  $J_{\text{C-P}} = 16.2$  Hz,  $\text{C}_{\text{Ar}}$ ), 125.2 (d,  $J_{\text{C-P}} = 3.2$  Hz,  $\text{C}_{\text{Ar}}$ ), 118.6 (d,  $J_{\text{C-P}} = 87.0$  Hz,  $\text{C}_{\text{Ar}}$ ), 105.4 (d,  $J_{\text{C-P}} = 2.2$  Hz,  $(\text{Ph}_2\text{C})_2\text{CH-PPh}_3$ ), 16.8 (d,  $J_{\text{C-P}} = 73.1$  Hz,  $(\text{Ph}_2\text{C})_2\text{CH-PPh}_3$ ). HRMS (ESI, Positive):  $m/z$ : 453.1761 ( $\text{M}^+$ ) (calcd.: 453.1767 for  $\text{C}_{33}\text{H}_{26}\text{P}^+$ ).



### Synthesis 9 and 9'

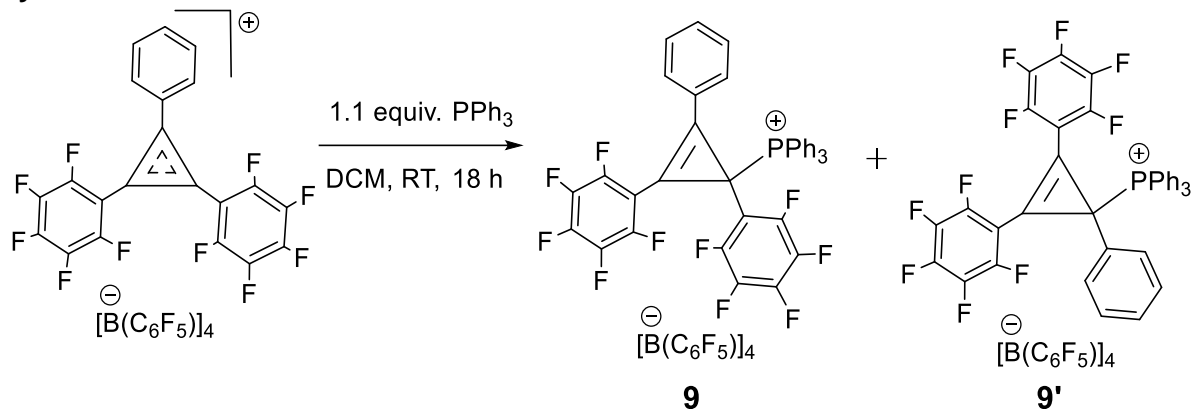

Compounds **9** and **9'** were prepared by following the protocol for **8** whereas  $[\text{Ph}(\text{C}_6\text{F}_5)_2\text{C}_3][\text{B}(\text{C}_6\text{F}_5)_4]$  (**3**) (56.3 mg, 0.05 mmol, 1.0 equiv.),  $\text{PPh}_3$  (15.7 mg, 0.06 mmol, 1.1 equiv.) were employed in DCM (1.0 mL). After work up, it gave mixture of compounds **9** and **9'** in a total yield of 58.0 mg, 84%. The salts were inseparable mixture whilst  $^{31}\text{P}$  NMR suggests **9** and **9'** is 1:1. X-ray quality crystals were grown with a mixture of solvent of DCM:PhCN:*n*-hexanes (1:1:5) at RT for a week. **9** and **9'**:  $^1\text{H}$  NMR (400 MHz,  $\text{CD}_3\text{CN}/\text{DCM}$ ):  $\delta_{\text{H}}$  8.24 - 8.03 (m, 13 H, Ar-*H*), 8.03 - 7.92 (m, 4H, Ar-*H*), 7.92 - 7.80 (m, 3 H, Ar-*H*);  $^{31}\text{P}$  NMR (162 MHz,  $\text{CD}_3\text{CN}/\text{DCM}$ ):  $\delta_{\text{P}}$  25.8 (s, 1 P,  $(\text{Ph}(\text{C}_6\text{F}_5)\text{C})_2\text{C}(\text{C}_6\text{F}_5)\text{-PPh}_3$ ), 25.1 (s, 1 P,  $((\text{C}_6\text{F}_5)_2\text{C})_2\text{C}(\text{Ph})\text{-PPh}_3$ );  $^{31}\text{P}\{^1\text{H}\}$  NMR (162 MHz,  $\text{CD}_3\text{CN}/\text{DCM}$ ):  $\delta_{\text{P}}$  25.8 (s, 1 P,  $(\text{Ph}(\text{C}_6\text{F}_5)\text{C})_2\text{C}(\text{C}_6\text{F}_5)\text{-PPh}_3$ ), 25.1 (s, 1 P,  $((\text{C}_6\text{F}_5)_2\text{C})_2\text{C}(\text{Ph})\text{-PPh}_3$ );  $^{19}\text{F}$  NMR (377 MHz,  $\text{CD}_3\text{CN}/\text{DCM}$ ):  $\delta_{\text{F}}$  -133.7 (m, 8 F, *o*- $\text{C}_6\text{F}_5$  of  $-\text{B}(\text{C}_6\text{F}_5)_4$ ), -135.9 (m, 4 F, *o*- $\text{C}_6\text{F}_5$  of  $((\text{C}_6\text{F}_5)_2\text{C})_2\text{C}(\text{Ph})\text{-PPh}_3$ ), -136.3 (m, 2 F, *o*- $\text{C}_6\text{F}_5$  of  $(\text{Ph}(\text{C}_6\text{F}_5)\text{C})_2\text{C}(\text{C}_6\text{F}_5)\text{-PPh}_3$ ), -137.8 (m, 2 F, *o*- $\text{C}_6\text{F}_5$  of  $(\text{Ph}(\text{C}_6\text{F}_5)\text{C})_2\text{C}(\text{C}_6\text{F}_5)\text{-PPh}_3$ ), -145.2 (m, 2 F, *p*- $\text{C}_6\text{F}_5$  of  $((\text{C}_6\text{F}_5)_2\text{C})_2\text{C}(\text{Ph})\text{-PPh}_3$ ), -147.2 (m, 1 F, *p*- $\text{C}_6\text{F}_5$  of  $(\text{Ph}(\text{C}_6\text{F}_5)\text{C})_2\text{C}(\text{C}_6\text{F}_5)\text{-PPh}_3$ ), -150.2 (m, 1 F, *p*- $\text{C}_6\text{F}_5$  of  $(\text{Ph}(\text{C}_6\text{F}_5)\text{C})_2\text{C}(\text{C}_6\text{F}_5)\text{-PPh}_3$ ), -159.7 (m, 4 F, *m*- $\text{C}_6\text{F}_5$  of  $((\text{C}_6\text{F}_5)_2\text{C})_2\text{C}(\text{Ph})\text{-PPh}_3$ ), -160.1 (m, 2 F, *m*- $\text{C}_6\text{F}_5$  of  $(\text{Ph}(\text{C}_6\text{F}_5)\text{C})_2\text{C}(\text{C}_6\text{F}_5)\text{-PPh}_3$ ), -160.6 (m, 2 F, *m*- $\text{C}_6\text{F}_5$  of  $(\text{Ph}(\text{C}_6\text{F}_5)\text{C})_2\text{C}(\text{C}_6\text{F}_5)\text{-PPh}_3$ ), -164.6 (m, 4 F, *p*- $\text{C}_6\text{F}_5$  of  $-\text{B}(\text{C}_6\text{F}_5)_4$ ), -168.4 (m, 8 F, *m*- $\text{C}_6\text{F}_5$  of  $-\text{B}(\text{C}_6\text{F}_5)_4$ );  $^{11}\text{B}$  NMR (128 MHz,  $\text{CD}_3\text{CN}/\text{DCM}$ ):  $\delta_{\text{B}}$  -17.9 (br s, 1 B,  $-\text{B}(\text{C}_6\text{F}_5)_4$ );  $^{13}\text{C}$  NMR (101 MHz,  $\text{CD}_3\text{CN}/\text{DCM}$ ):  $\delta_{\text{C}}$  150.2 (br m,  $-\text{C}_6\text{F}_5$ ), 147.8 (br m,  $-\text{C}_6\text{F}_5$ ), 146.3 (br m,  $-\text{C}_6\text{F}_5$ ), 145.6 (br m,  $-\text{C}_6\text{F}_5$ ), 143.7 (br m,  $-\text{C}_6\text{F}_5$ ), 140.1 (br m,  $-\text{C}_6\text{F}_5$ ), 139.5 (br m,  $-\text{C}_6\text{F}_5$ ), 138.1 (br m,  $-\text{C}_6\text{F}_5$ ), 137.7 (br m,  $-\text{C}_6\text{F}_5$ ),

137.0 (br m, -C<sub>6</sub>F<sub>5</sub>), 135.9 (m, C<sub>Ar</sub>), 135.7 (br m, -C<sub>6</sub>F<sub>5</sub>), 134.7 (d, J<sub>C-P</sub> = 9.4 Hz, C<sub>Ar</sub>), 134.5 (d, J<sub>C-P</sub> = 10.1 Hz, C<sub>Ar</sub>), 133.2 (s, C<sub>Ar</sub>), 132.3 (d, J<sub>C-P</sub> = 29.0 Hz, C<sub>Ar</sub>), 130.4 (d, J<sub>C-P</sub> = 12.1 Hz, C<sub>Ar</sub>), 130.1 (d, J<sub>C-P</sub> = 12.8 Hz, C<sub>Ar</sub>), 129.7 (d, J<sub>C-P</sub> = 16.2 Hz, C<sub>Ar</sub>), 129.0 (s, C<sub>Ar</sub>), 117.0 (d, J<sub>C-P</sub> = 83.9 Hz, C<sub>Ar</sub>), 116.5 (d, J<sub>C-P</sub> = 83.9 Hz, C<sub>Ar</sub>), doublets are not resolved for -C(Ph)-PPh<sub>3</sub> and -C(C<sub>6</sub>F<sub>5</sub>)-PPh<sub>3</sub>. HRMS (ESI, Positive) m/z: 709.1130 (M<sup>+</sup>) (calcd.: 709.1137 for C<sub>39</sub>H<sub>20</sub>F<sub>10</sub>P<sup>+</sup>).

### Synthesis 10

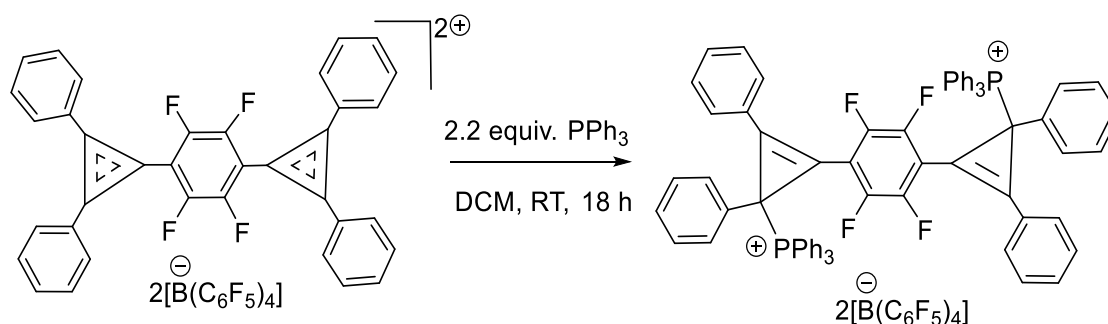

Compound **10** was prepared by following the protocol for **8** whereas [Ph<sub>2</sub>C<sub>3</sub>-C<sub>6</sub>F<sub>4</sub>-C<sub>3</sub>Ph<sub>2</sub>][2B(C<sub>6</sub>F<sub>5</sub>)<sub>4</sub>] (**6**) (56.6 mg, 0.03 mmol, 1.0 equiv.), PPh<sub>3</sub> (18.4 mg, 0.07 mmol, 2.2 equiv.) were employed in DCM (1.0 mL). After work up, it gave compound **10** (70.0 mg, 97%). X-ray quality crystals were grown with a mixture of solvent of DCM:CH<sub>3</sub>CN:*n*-hexanes (1:1:5) at -30 °C for a week. **10**: C<sub>120</sub>H<sub>50</sub>B<sub>2</sub>F<sub>44</sub>P<sub>2</sub>·2.7CH<sub>2</sub>Cl<sub>2</sub> requires: C 55.8, H 2.11. Found: C 55.8, H 2.33%. <sup>1</sup>H NMR (400 MHz, CD<sub>3</sub>CN/DCM): δ<sub>H</sub> 7.85 - 7.74 (m, 6 H, Ar-H), 7.63 - 7.52 (m, 25 H, Ar-H), 7.49 - 7.43 (m, 8 H, Ar-H), 7.41 - 7.35 (m, 3 H, Ar-H), 7.34 - 7.27 (m, 4 H, Ar-H), 7.28 - 7.21 (m, 4 H, Ar-H); <sup>31</sup>P NMR (162 MHz, CD<sub>3</sub>CN/DCM): δ<sub>P</sub> 30.8 (s, 1 P, - (C<sub>6</sub>F<sub>4</sub>)C<sub>3</sub>(Ph<sub>2</sub>)PPh<sub>3</sub>); <sup>31</sup>P{<sup>1</sup>H} NMR (162 MHz, CD<sub>3</sub>CN/DCM): δ<sub>P</sub> 30.8 (s, 1 P, - (C<sub>6</sub>F<sub>4</sub>)C<sub>3</sub>(Ph<sub>2</sub>)PPh<sub>3</sub>); <sup>19</sup>F NMR (377 MHz, CD<sub>3</sub>CN/DCM): δ<sub>F</sub> -133.5 (m, 8 F, *o*-C<sub>6</sub>F<sub>5</sub> of -B(C<sub>6</sub>F<sub>5</sub>)<sub>4</sub>), -135.0 (d, J<sub>F-F</sub> = 39.7 Hz, 4 F, C<sub>6</sub>F<sub>4</sub> of (PPh<sub>3</sub>(Ph<sub>2</sub>)C<sub>3</sub>(C<sub>6</sub>F<sub>4</sub>)C<sub>3</sub>(Ph<sub>2</sub>)PPh<sub>3</sub>)), -163.8 (m, 4 F, *p*-C<sub>6</sub>F<sub>5</sub> of -B(C<sub>6</sub>F<sub>5</sub>)<sub>4</sub>), -168.1 (m, 8 F, *m*-C<sub>6</sub>F<sub>5</sub> of -B(C<sub>6</sub>F<sub>5</sub>)<sub>4</sub>); <sup>11</sup>B NMR (128 MHz, CD<sub>3</sub>CN/DCM): δ<sub>B</sub> -16.7 (br s, 1 B, -B(C<sub>6</sub>F<sub>5</sub>)<sub>4</sub>); <sup>13</sup>C NMR (101 MHz, CD<sub>3</sub>CN/DCM): δ<sub>C</sub> 150.2 (br m, -C<sub>6</sub>F<sub>5</sub>), 147.7 (br m, -C<sub>6</sub>F<sub>5</sub>), 140.2 (br m, -C<sub>6</sub>F<sub>5</sub>), 138.2 (br m, -C<sub>6</sub>F<sub>5</sub>), 137.8 (br m, -C<sub>6</sub>F<sub>5</sub>), 137.5 (br m, -C<sub>6</sub>F<sub>5</sub>), 136.1 (d, J<sub>C-P</sub> = 3.3 Hz, C<sub>Ar</sub>), 135.6 (d, J<sub>C-P</sub> = 2.5 Hz, C<sub>Ar</sub>), 135.5 (d, J<sub>C-P</sub> = 2.3 Hz, C<sub>Ar</sub>), 133.3 (s, C<sub>Ar</sub>), 131.0 (d, J<sub>C-P</sub> = 12.4 Hz, C<sub>Ar</sub>), 130.8 (s, C<sub>Ar</sub>), 130.2 (d, J<sub>C-P</sub>

= 24.0 Hz,  $C_{Ar}$ ), 129.7 (s,  $C_{Ar}$ ), 129.0 (d,  $J_{C-P} = 3.4$  Hz,  $C_{Ar}$ ), 124.6 (s,  $C_{Ar}$ ), 119.7 (s,  $C_{Ar}$ ), 118.7 (d,  $J_{C-P} = 83.4$  Hz,  $C_{Ar}$ ), 33.9 (d,  $J_{C-P} = 74.0$  Hz,  $-C(Ph)-PPh_3$ ). MS (MALDI-TOF)  $m/z$ : 528.2 ( $M^+ - 2PPh_3$ ) (calcd.: 528.1 for  $C_{36}H_{20}F_4^{2+}$ ).

### Synthesis 11 and 12

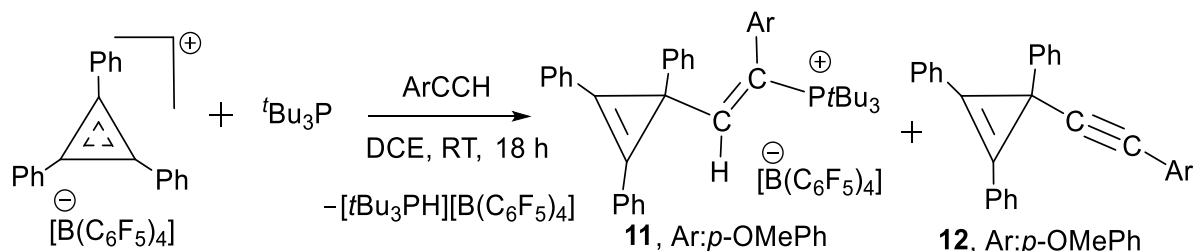

Into a 4 mL vial equipped with a stir bar,  $[\text{Ph}_3\text{C}_3][\text{B(C}_6\text{F}_5)_4]$ , **2a** (94.6 mg, 0.1 mmol, 1.0 equiv.) and  $t\text{Bu}_3\text{P}$  (20.2 mg, 0.10 mmol, 1.0 equiv.) were taken in DCE (1.0 mL). A solution of 4-methoxy phenylacetylene (13.2 mg, 0.1 mmol, 1.0 equiv.) in DCE (0.5 mL) was transferred to the vial. The reaction mixture was allowed to stir at RT for 18 h.  $^{31}\text{P}$  NMR analysis of the crude mixture suggests  $[\text{tBu}_3\text{PH][B(C}_6\text{F}_5)_4]$  (80% yield),  $[(\text{Ph}_3\text{C})_3\text{CHC(C}_6\text{H}_4\text{OMe)P}(t\text{-Bu})_3][\text{B(C}_6\text{F}_5)_4]$  (**11**) (20% yield) and affirms completion of reaction. After removal of all volatiles, the residue was extracted with benzene (3 x 2 mL) and the benzene washings were combined together for chromatographic purification.

The oily residue, a mixture of salts, was crystallized in DCM:*n*-hexane (1:5) at RT for a week. Since the salts were inseparable mixture, a partial characterization data included here for **11**. **11**:  $^{31}\text{P}$  NMR (162 MHz, DCM):  $\delta_{\text{P}}$  45.5 (m, 1 P,  $-(\text{Ph}_3\text{C})_3\text{CHC(Ar)P}(t\text{-Bu})_3$ ),  $^{31}\text{P}\{^1\text{H}\}$  NMR (162 MHz, DCM):  $\delta_{\text{P}}$  45.5 (s, 1 P,  $-(\text{Ph}_3\text{C})_3\text{CHC(Ar)P}(t\text{-Bu})_3$ );  $^{19}\text{F}$  NMR (377 MHz, DCM):  $\delta_{\text{F}}$  -132.4 (m, 8 F, *o*- $\text{C}_6\text{F}_5$  of  $-\text{B(C}_6\text{F}_5)_4$ ), -162.8 (m, 4 F, *p*- $\text{C}_6\text{F}_5$  of  $-\text{B(C}_6\text{F}_5)_4$ ), -166.6 (m, 8 F, *m*- $\text{C}_6\text{F}_5$  of  $-\text{B(C}_6\text{F}_5)_4$ );  $^{11}\text{B}$  NMR (128 MHz, DCM):  $\delta_{\text{B}}$  -16.6 (br s, 1 B,  $-\text{B(C}_6\text{F}_5)_4$ ). HRMS (ESI, Positive)  $m/z$ : 601.3595 ( $M^+$ ) (calcd.: 601.3594 for  $\text{C}_{42}\text{H}_{50}\text{OP}^+$ ).

Combined benzene washings were taken and all volatiles were evaporated off under reduced pressure. The residue was taken into minimum DCM. The DCM solution loaded on preparative TLC plates and eluted with 10% EtOAc and *n*-hexanes. This yielded a major

yellow band with the  $R_f = 0.53$ . This was collected in affording yellow solid compound **12** (29.0 mg, 73%). X-ray quality crystals were grown via evaporation of a  $\text{CDCl}_3$  solution of **12**. **12**:  $^1\text{H NMR}$  (400 MHz,  $\text{CDCl}_3$ ):  $\delta_{\text{H}}$  7.75 (dt,  $J = 7.6, 1.3$  Hz, 4 H, Ar-*H*), 7.60 (dt,  $J = 7.7, 1.4$  Hz, 2 H, Ar-*H*), 7.52 - 7.43 (m, 4 H, Ar-*H*), 7.44 - 7.34 (m, 4 H, Ar-*H*), 7.30 (tt,  $J = 7.9, 1.7$  Hz, 2 H, Ar-*H*), 7.18 (tt,  $J = 7.3, 1.8$  Hz, 1 H, Ar-*H*), 6.81 (dt,  $J = 8.8, 1.8$  Hz, 2 H, Ar-*H*), 3.79 (s, 1 H,  $-\text{OCH}_3$ );  $^{13}\text{C NMR}$  (101 MHz,  $\text{CDCl}_3$ ):  $\delta_{\text{C}}$  159.2 (s,  $\text{C}_{\text{Ar}}$  of Ph), 142.9 (s,  $\text{C}_{\text{Ar}}$  of Ph), 133.3 (s,  $\text{C}_{\text{Ar}}$  of Ph), 130.1 (s,  $\text{C}_{\text{Ar}}$  of Ph), 129.4 (s,  $\text{C}_{\text{Ar}}$  of Ph), 129.1 (s,  $\text{C}_{\text{Ar}}$  of Ph), 128.2 (s,  $\text{C}_{\text{Ar}}$  of Ph), 126.7 (s,  $\text{C}_{\text{Ar}}$  of Ph), 126.3 (s,  $\text{C}_{\text{Ar}}$  of Ph), 125.9 (s,  $\text{C}_{\text{Ar}}$  of Ph), 116.4 (s,  $\text{C}_{\text{Ar}}$  of Ph), 113.9 (s,  $\text{C}_{\text{Ar}}$  of Ph), 112.5 (s,  $(\text{Ph}_2\text{C})_2\text{C}(\text{Ph})^-$ ), 90.8 (s,  $\text{C}_{\text{alkyne}}$ ), 78.4 (s,  $\text{C}_{\text{alkyne}}$ ), 55.4 (s,  $-\text{OCH}_3$ ), 24.0 (s,  $(\text{Ph}_2\text{C})_2\text{C}(\text{Ph})^-$ ). HRMS (DART)  $m/z$ : 399.1737 ( $\text{M}^+\text{+H}$ ) (calcd.: 399.1743 for  $\text{C}_{30}\text{H}_{23}\text{O}$ ).

### Synthesis 13

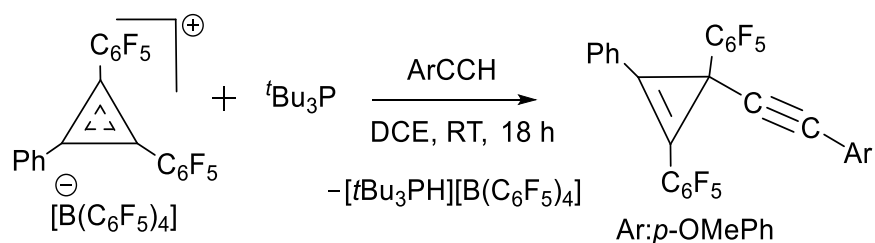

**13** (39 mg, 67%) was prepared by following the protocol for **12**. **13**:  $^1\text{H NMR}$  (400 MHz,  $\text{CDCl}_3$ ):  $\delta_{\text{H}}$  7.94 (dt,  $J = 7.7, 1.5$  Hz, 2 H, Ar-*H*), 7.59 - 7.45 (m, 2 H, Ar-*H*), 7.50 (tt,  $J = 7.9, 1.9$  Hz, 1 H, Ar-*H*), , 7.39 - 7.28 (m, 2 H, Ar-*H*), 6.87 - 6.67 (m, 2 H, Ar-*H*), 3.78 (s, 1 H,  $-\text{OCH}_3$ );  $^{19}\text{F NMR}$  (377 MHz,  $\text{CDCl}_3$ ):  $\delta_{\text{F}}$  -136.7 (m, 2 F, *o*- $\text{C}_6\text{F}_5$  of  $-\text{C}(\text{C}_6\text{F}_5)\text{-CCAr}$ ), -141.4 (m, 2 F, *o*- $\text{C}_6\text{F}_5$  of  $((\text{C}_6\text{F}_5)(\text{Ph})\text{C})_2\text{C}^-$ ), -151.0 (m, 1 F, *p*- $\text{C}_6\text{F}_5$  of  $-\text{C}(\text{C}_6\text{F}_5)\text{-CCAr}$ ), -156.2 (m, 1 F, *p*- $\text{C}_6\text{F}_5$  of  $((\text{C}_6\text{F}_5)(\text{Ph})\text{C})_2\text{C}^-$ ), -161.0 (m, 2 F, *m*- $\text{C}_6\text{F}_5$  of  $-\text{C}(\text{C}_6\text{F}_5)\text{-CCAr}$ ), -162.0 (m, 2 F, *m*- $\text{C}_6\text{F}_5$  of  $((\text{C}_6\text{F}_5)(\text{Ph})\text{C})_2\text{C}^-$ );  $^{13}\text{C NMR}$  (101 MHz,  $\text{CDCl}_3$ ):  $\delta_{\text{C}}$  159.8 (s,  $\text{C}_{\text{Ar}}$  of Ph), 146.4 (br s,  $-\text{C}_6\text{F}_5$ ), 143.8 (br s,  $-\text{C}_6\text{F}_5$ ), 139.4 (br m,  $-\text{C}_6\text{F}_5$ ), 136.6 (br m,  $-\text{C}_6\text{F}_5$ ), 134.6 (br m,  $-\text{C}_6\text{F}_5$ ), 133.6 (s,  $\text{C}_{\text{Ar}}$  of Ph), 131.2 (s,  $\text{C}_{\text{Ar}}$  of Ph), 130.2 (s,  $\text{C}_{\text{Ar}}$  of Ph), 130.0 (br m,  $\text{C}_{\text{Ar}}$  of Ph), 128.5 (s,  $\text{C}_{\text{Ar}}$  of Ph), 126.4 (s,  $\text{C}_{\text{Ar}}$  of Ph), 125.2 (s,  $\text{C}_{\text{Ar}}$  of Ph), 121.0 ( $\text{Ph}(\text{C}_6\text{F}_5)\text{C})_2\text{C}^-$ ), 115.1 ( $\text{Ph}(\text{C}_6\text{F}_5)\text{C})_2\text{C}^-$ ), 114.0 (s,  $\text{C}_{\text{Ar}}$  of Ph), 89.1 (s,  $\text{C}_{\text{alkyne}}$ ), 80.9 (s,  $\text{C}_{\text{alkyne}}$ ), 55.5 (s,  $-\text{OCH}_3$ ), 31.1 (s,  $-\text{C}(\text{C}_6\text{F}_5)\text{-CCAr}$ ). HRMS (DART)  $m/z$ : 579.07939 ( $\text{M}^+\text{+H}$ ) (calcd.: 579.08012 for  $\text{C}_{30}\text{H}_{13}\text{OF}_{10}$ ).

### Synthesis 14

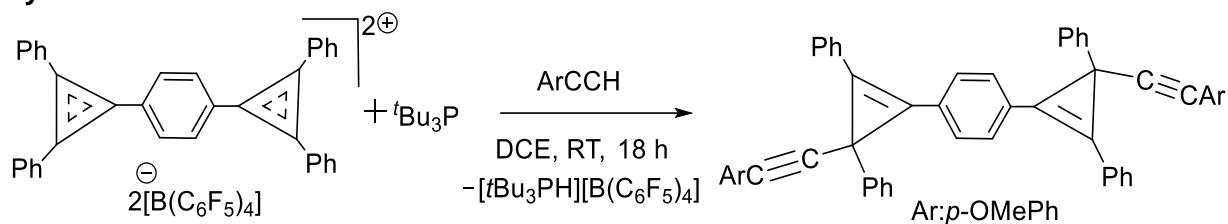

**14** (25 mg, 69%) was prepared by following the protocol for **12** whereas  $[Ph_2C_3C_6H_4C_3Ph_2][2B(C_6F_5)_4]$  (**5**) (90.7 mg, 0.05 mmol, 1.0 equiv.),  $tBu_3P$  (20.2 mg, 0.10 mmol, 2.0 equiv.) and 4-methoxy phenylacetylene (13.2 mg, 0.1 mmol, 2.0 equiv.) were employed in DCE (1.5 mL). **14**:  $^1H$  NMR (400 MHz,  $CDCl_3$ ):  $\delta_H$  7.81 (s, 4 H,  $-C_3C_6H_4C_3-$ ), 7.69 - 7.63 (m, 4 H, Ar-H), 7.56 (tt,  $J = 7.2, 1.4$  Hz, 4 H, Ar-H), 7.49 - 7.43 (m, 8 H, Ar-H), 7.41 - 7.37 (m, 8 H, Ar-H), 6.82 - 6.79 (m, 4 H, Ar-H), 3.79 (s, 6 H,  $-OCH_3$ );  $^{13}C$  NMR (101 MHz,  $CDCl_3$ ):  $\delta_C$  159.2 (s,  $C_{Ar}$  of Ph), 144.8 (s,  $C_{Ar}$  of Ph), 142.6 (s,  $C_{Ar}$  of Ph), 133.3 (s,  $C_{Ar}$  of Ph), 130.5 (s,  $C_{Ar}$  of Ph), 130.2 (s,  $C_{Ar}$  of Ph), 130.1 (s,  $C_{Ar}$  of Ph), 129.1 (s,  $C_{Ar}$  of Ph), 129.2 (s,  $C_{Ar}$  of Ph), 128.3 (s,  $C_{Ar}$  of Ph), 128.2 (s,  $C_{Ar}$  of Ph), 127.0 (s,  $C_{Ar}$  of Ph), 126.3 (s,  $C_{Ar}$  of Ph), 116.5 ( $-C_3C_6H_4C_3-$ ), 116.2 ( $-C_3C_6H_4C_3-$ ), 113.9 (s,  $C_{Ar}$  of Ph), 90.7 (s,  $C_{alkyne}$ ), 78.6 (s,  $C_{alkyne}$ ), 55.4 (s,  $-OCH_3$ ), 29.7 (s,  $-C(Ph)-CCAr$ ). HRMS (DART)  $m/z$ : 719.29404 ( $M^+ + H$ ) (calcd.: 719.29446 for  $C_{54}H_{39}O_2$ ).

### Synthesis 15

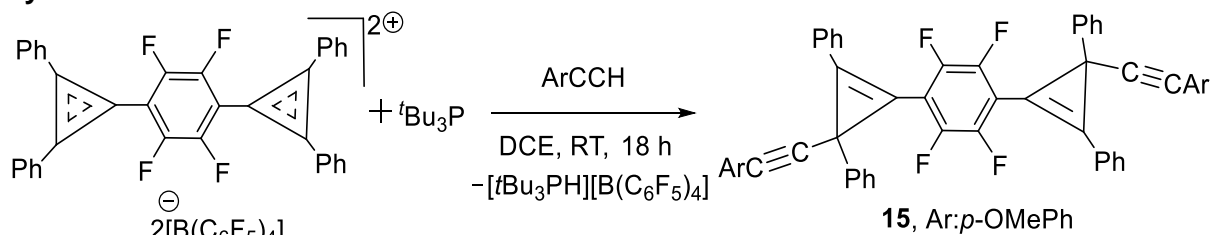

**15** (26 mg, 66%) was prepared by following the protocol for **12** whereas  $[Ph_2C_3C_6F_4C_3Ph_2][2B(C_6F_5)_4]$  (**6**) (94.3 mg, 0.05 mmol, 1.0 equiv.),  $tBu_3P$  (20.2 mg, 0.10 mmol, 2.0 equiv.) and 4-methoxy phenylacetylene (13.2 mg, 0.1 mmol, 2.0 equiv.) were employed in DCE (1.5 mL). **15**:  $^1H$  NMR (400 MHz,  $CDCl_3$ ):  $\delta_H$  7.95 - 7.78 (m, 8 H, Ar-H), 7.58 - 7.50 (m, 4 H, Ar-H), 7.48 - 7.43 (m, 4 H, Ar-H), 7.43 - 7.39 (m, 4 H, Ar-H), 7.30 - 7.26 (m, 4 H, Ar-H), 6.82 - 7.79 (m, 4 H, Ar-H), 3.79 (s, 6 H,  $-OCH_3$ );  $^{19}F$  NMR (377 MHz,  $CDCl_3$ ):  $\delta_F$  -138.5 (s, 4 F,  $-C_3C_6H_4C_3-$ );  $^{13}C$  NMR (101 MHz,  $CDCl_3$ ):  $\delta_C$  159.5 (s,  $C_{Ar}$  of Ph), 143.8 (br

m,  $C_{Ar}$  of  $C_6F_4$ ), 133.5 (s,  $C_{Ar}$  of Ph), 131.2 (s,  $C_{Ar}$  of Ph), 130.8 (s,  $C_{Ar}$  of Ph), 129.9 (s,  $C_{Ar}$  of Ph), 129.6 (s,  $C_{Ar}$  of Ph), 129.5 (s,  $C_{Ar}$  of Ph), 129.3 (s,  $C_{Ar}$  of Ph), 128.9 (s,  $C_{Ar}$  of Ph), 128.4 (s,  $C_{Ar}$  of  $C_6F_4$ ), 127.1 (s,  $C_{Ar}$  of Ph), 126.5 (s,  $C_{Ar}$  of Ph), 126.4 (s,  $C_{Ar}$  of Ph), 125.7 (s,  $C_{Ar}$  of Ph), 116.0 ( $-C_3C_6H_4C_3^-$ ), 115.9 ( $-C_3C_6H_4C_3^-$ ), 90.2 (s,  $C_{alkyne}$ ), 79.5 (s,  $C_{alkyne}$ ), 55.5 ( $-OCH_3$ ), 29.8 (s,  $-C(Ph)-CCAr$ ). HRMS (DART)  $m/z$ : 791.25856 ( $M^+ + H$ ) (calcd.: 791.25677 for  $C_{54}H_{35}O_2F_4$ ).

## Synthesis 16

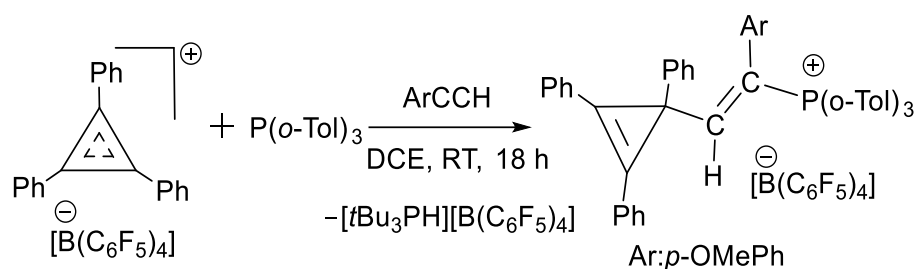

**16** (89.9 mg, 65%) was prepared by following the protocol for **11** whereas  $[Ph_3C_3][B(C_6F_5)_4]$  (**2a**) (19.2 mg, 0.02 mmol, 1.0 equiv.),  $P(o-Tol)_3$  (20.2 mg, 0.02 mmol, 1.0 equiv.) and 4-methoxy phenylacetylene (13.2 mg, 0.1 mmol, 1.0 equiv.) were employed in DCE (1.5 mL).  $^{31}P$  NMR suggests **16** (65% yield) and  $[HP(o-Tol)_3][B(C_6F_5)_4]$  (35% yield). **16**:  $^1H$  NMR (400 MHz,  $CDCl_3$ ):  $\delta_H$  7.69 (tt,  $J = 7.9, 1.2$  Hz, 1 H, Ar-*H*), 7.64 - 7.51 (m, 2 H, Ph*H*), 7.47 (tt,  $J = 6.9, 1.1$  Hz, 2 H, Ar-*H*), 7.43 - 7.27 (m, 11 H, Ph*H*), 7.23 - 7.14 (m, 4 H, Ph*H*), 7.14 - 6.96 (m, 9 H, Ph*H*), 6.95 - 6.78 (m, 2 H, Ph*H*), 6.39 (s, 1 H,  $CH=C$ ), 3.43 (s, 3 H,  $-OCH_3$ ), 2.68 (br s, 3 H,  $-CH_3$  of  $P(o-Tol)_3$ ), 2.28 (s, 3 H,  $-CH_3$  of  $P(o-Tol)_3$ ), 1.56 (br s, 3 H,  $-CH_3$  of  $P(o-Tol)_3$ );  $^{31}P$  NMR (400 MHz,  $CDCl_3$ ):  $\delta_P$  28.3 (s, 1 P of  $-C=C-P(o-Tol)_3$ );  $^{31}P\{^1H\}$  NMR (400 MHz,  $CDCl_3$ ):  $\delta_P$  28.3 (s, 1 P of  $-C=C-P(o-Tol)_3$ );  $^{19}F$  NMR (400 MHz,  $CDCl_3$ ):  $\delta_F$  -132.5 (m, 8 F, *o*- $C_6F_5$  of  $-B(C_6F_5)_4$ ), -163.2 (m, 4 F, *p*- $C_6F_5$  of  $-B(C_6F_5)_4$ ), -166.9 (m, 8 F, *m*- $C_6F_5$  of  $-B(C_6F_5)_4$ );  $^{11}B$  NMR (128 MHz,  $CDCl_3$ ):  $\delta_B$  16.6 (br s, 1 B);  $^{13}C$  NMR (126 MHz,  $CDCl_3$ ):  $\delta_C$  160.6 (s,  $C_{Ar}$  of Ph), 149.7 (br m,  $C_{Ar}$  of  $C_6F_4$ ), 147.2 (br m,  $C_{Ar}$  of  $C_6F_4$ ), 139.7 (br m,  $C_{Ar}$  of  $C_6F_4$ ), 137.7 (br m,  $C_{Ar}$  of  $C_6F_4$ ), 134.5 (br m,  $C_{Ar}$  of  $C_6F_4$ ), 134.6 (d,  $J = 13.6$  Hz,  $C_{Ar}$  of Ph), 133.8 (s,  $C_{Ar}$  of Ph), 133.4 (d,  $J = 7.7$  Hz,  $C_{Ar}$  of Ph), 130.5 (s,  $C_{Ar}$  of Ph), 130.1 (s,  $C_{Ar}$  of Ph),

130.0 (s, C<sub>Ar</sub> of Ph), 129.6 (s, C<sub>Ar</sub> of Ph), 129.5 (s, C<sub>Ar</sub> of Ph), 129.1 (d, *J* = 9.7 Hz, C<sub>Ar</sub> of Ph), 129.0 (s, C<sub>Ar</sub> of Ph), 128.8 (s, C<sub>Ar</sub> of Ph), 128.6 (s, C<sub>Ar</sub> of Ph), 128.4 (s, C<sub>Ar</sub> of Ph), 128.2 (s, C<sub>Ar</sub> of Ph), 127.0 (s, C<sub>Ar</sub> of Ph), 126.7 (s, C<sub>Ar</sub> of Ph) 126.1 (s, C<sub>Ar</sub> of Ph), 114.4 (-C<sub>2</sub>(Ph<sub>2</sub>)), 114.1 (s, C<sub>Ar</sub> of Ph), 75.9 (P-C=CH), 55.2 (-OCH<sub>3</sub>), 29.1 (s, -C(Ph)-CH=C). HRMS (ESI, Positive) *m/z*: 703.3122 for [M<sup>+</sup>] (calcd.: 703.3124 for C<sub>51</sub>H<sub>44</sub>OP).

## Cyclic Voltammetry (CV) data for all compounds

### Compound 2a

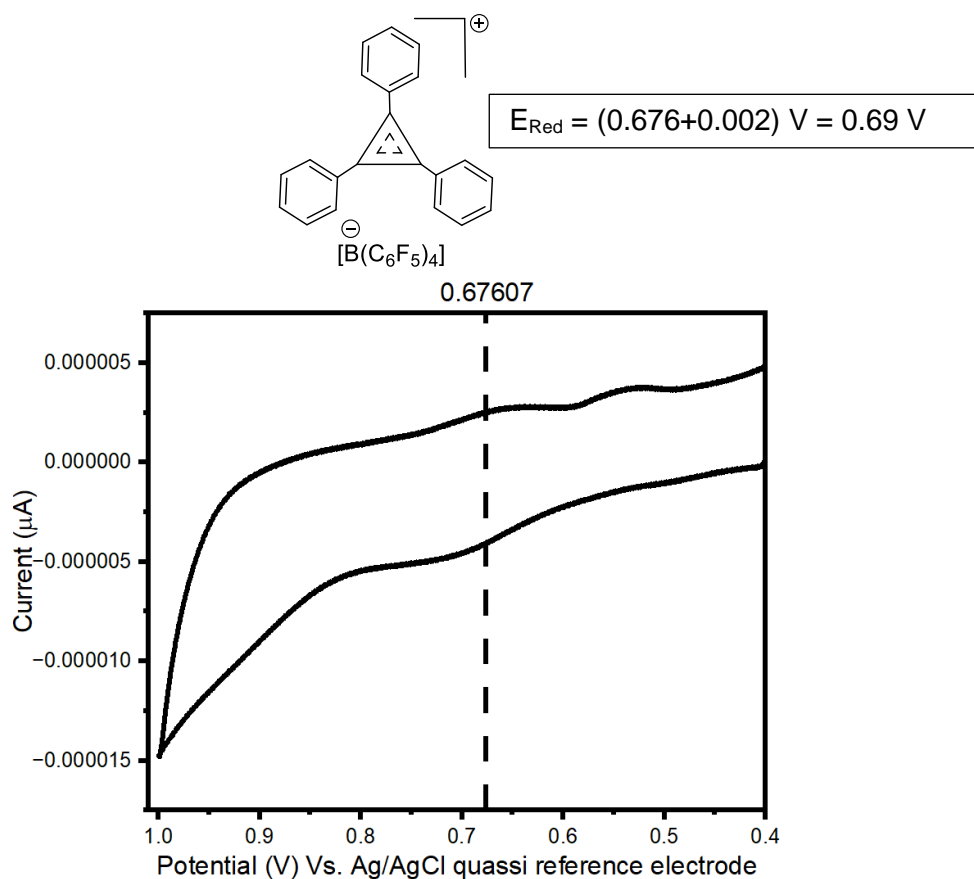

Figure S1. Evolution of CV of **2a** (0.1 M) in  $\text{CH}_3\text{CN}/\text{DCM}$  (1:1) with  $[(n\text{-Bu})_4\text{N}]\text{PF}_6$  as supporting electrolyte. Scan rate employed:  $0.1 \text{ V s}^{-1}$ .

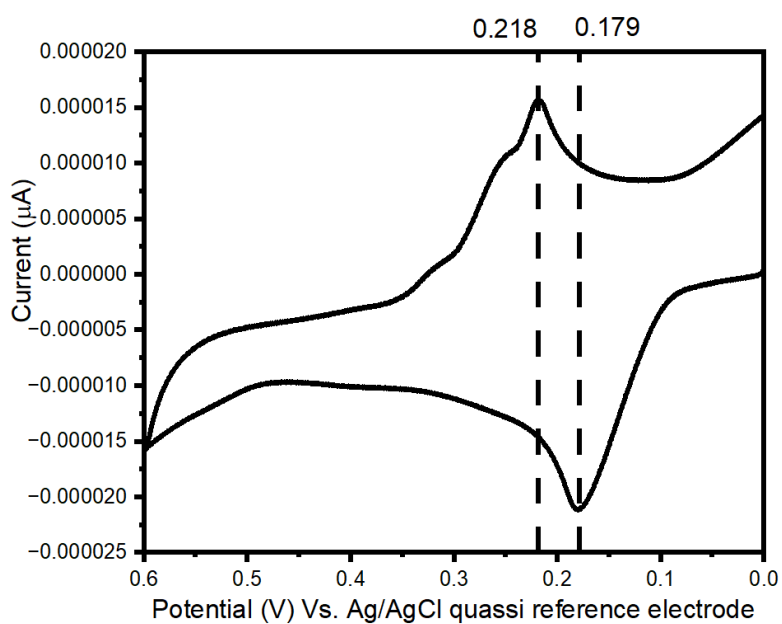

Figure S2. Evolution of CV of **2a** with internal ferrocene standard.



### Compound 3

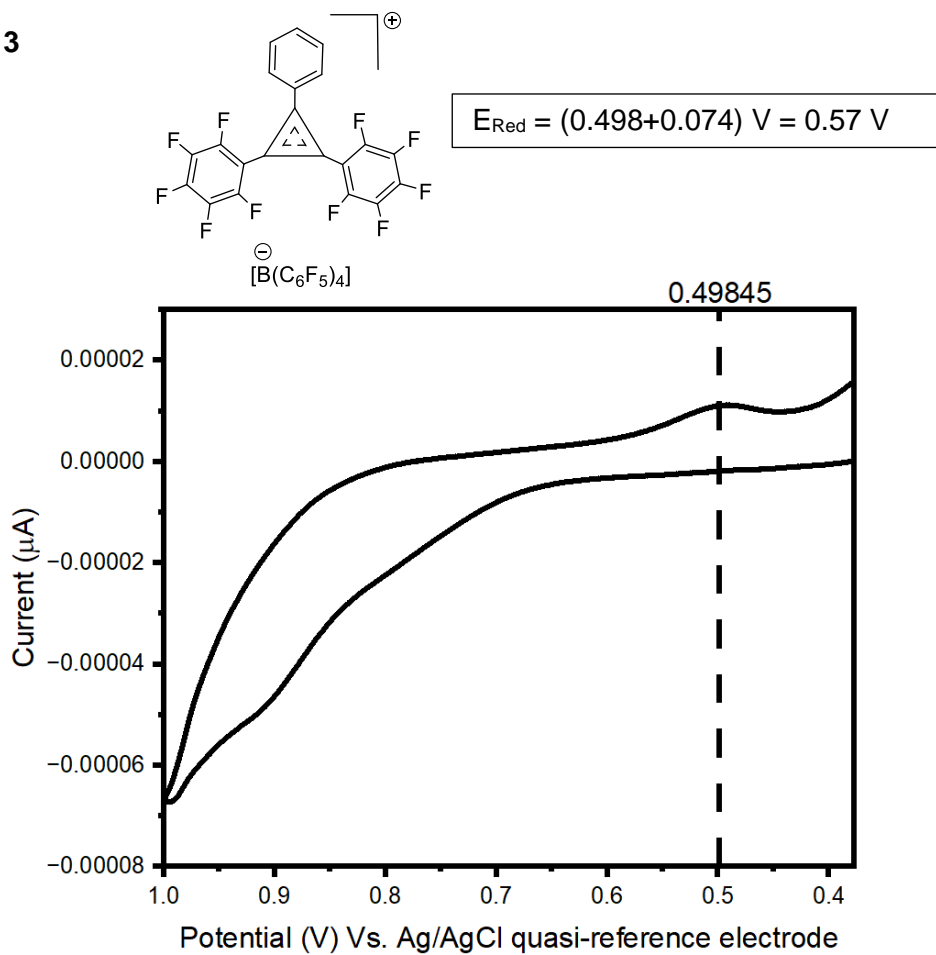

Figure S3. Evolution of CV of **3** (0.1 M) in  $\text{CH}_3\text{CN}/\text{DCM}$  (1:1) with  $[(n\text{-Bu})_4\text{N}]\text{PF}_6$  as supporting electrolyte. Scan rate employed:  $0.1 \text{ V s}^{-1}$ .

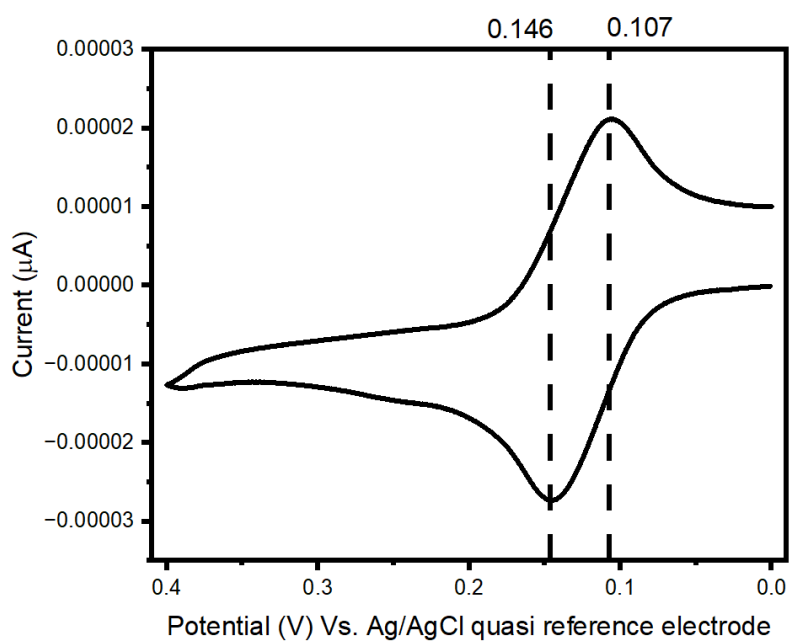

Figure S4. Evolution of CV of **3** with internal ferrocene standard.

### Compound 4a

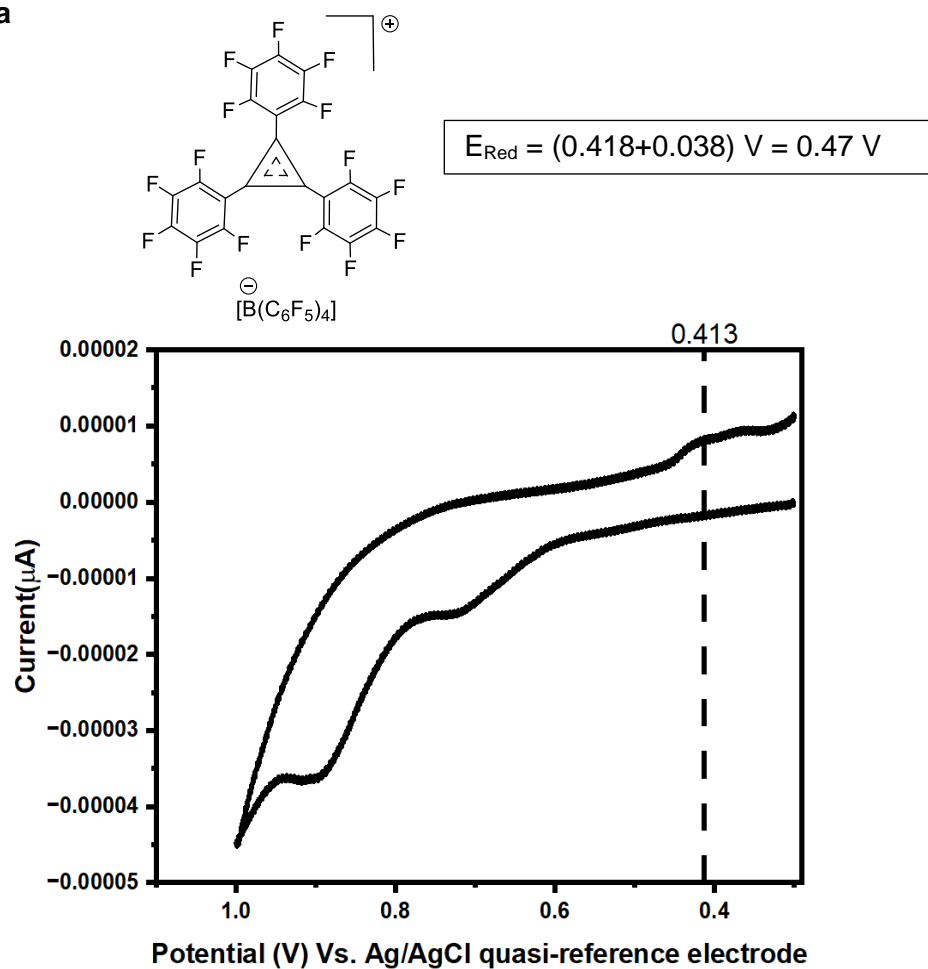

Figure S5. Evolution of CV of **4a** (0.1 M) in  $CH_3CN/DCM$  (1:1) with  $[(n-Bu)_4N]PF_6$  as supporting electrolyte. Scan rate employed:  $0.1 V s^{-1}$ .

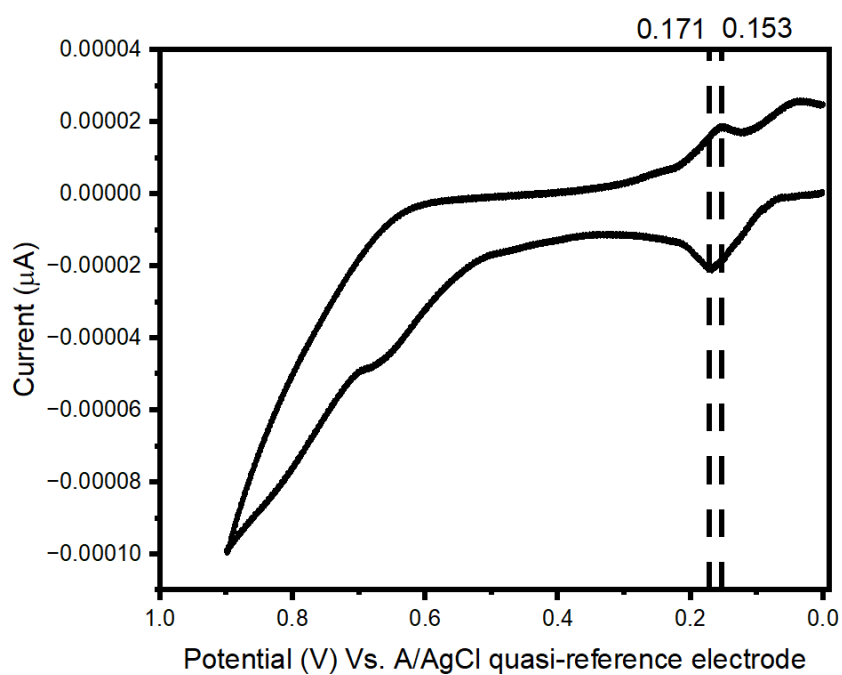

Figure S6. Evolution of CV of **4a** with internal ferrocene standard.

## Compound 5

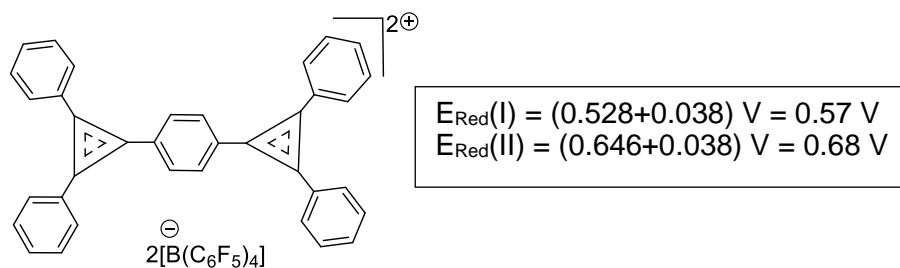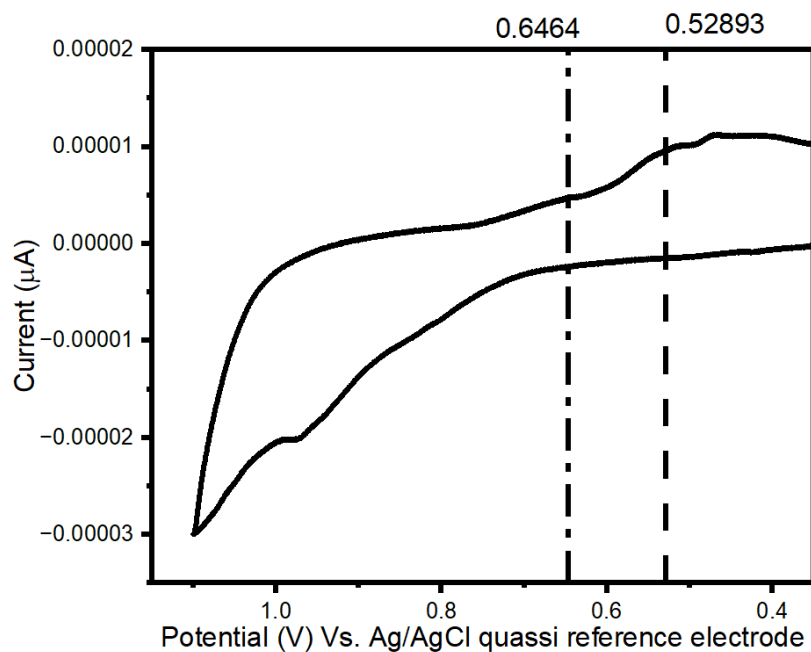

Figure S7. Evolution of CV of **5** (0.1 M) in  $\text{CH}_3\text{CN}/\text{DCM}$  (1:1) with  $[(n\text{-Bu})_4\text{N}]\text{PF}_6$  as supporting electrolyte. Scan rate employed:  $0.1 \text{ V s}^{-1}$ .

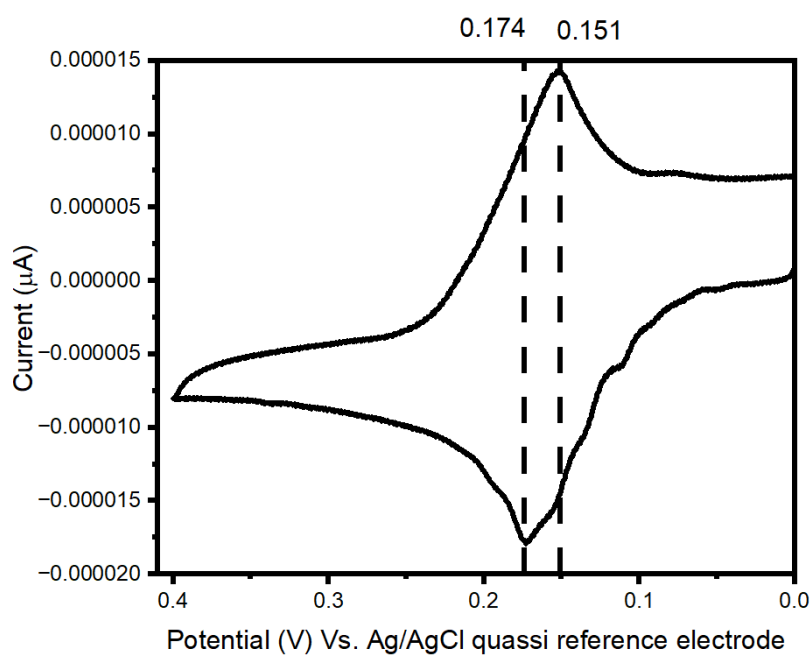

Figure S8. Evolution of CV of **5** with internal ferrocene standard.

### Compound 6

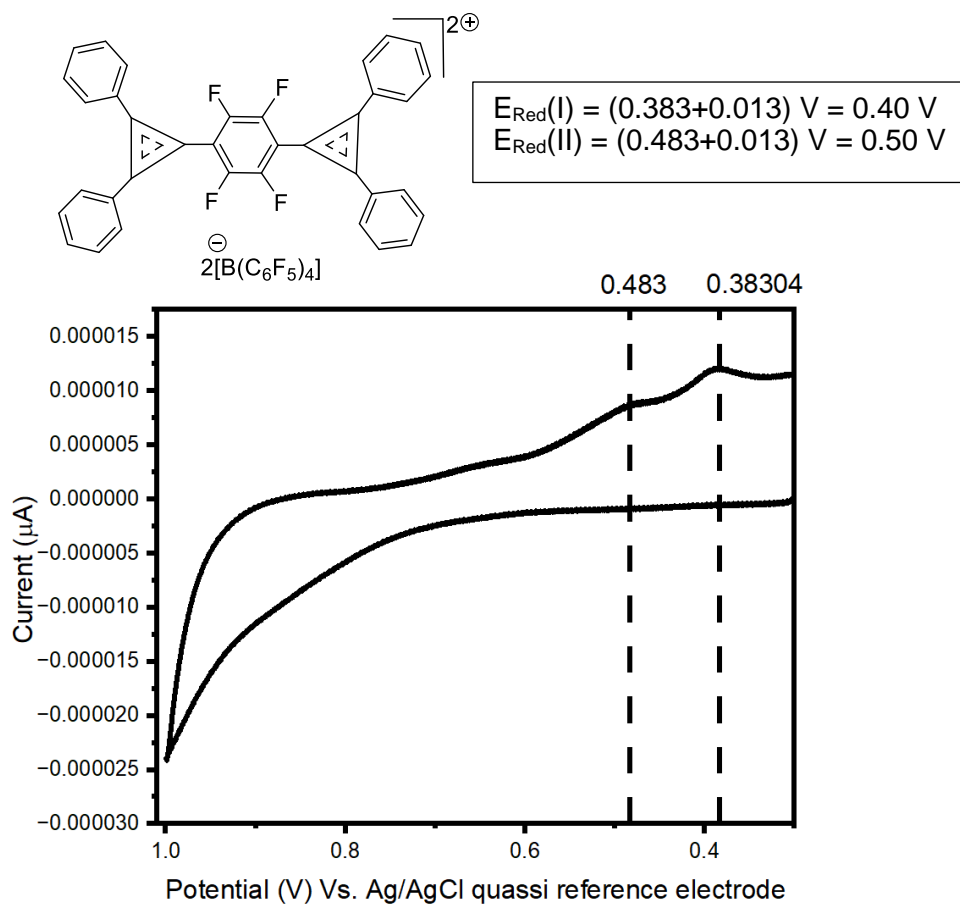

Figure S9. Evolution of CV of **6** (0.1 M) in  $\text{CH}_3\text{CN}/\text{DCM}$  (1:1) with  $[(n\text{-Bu})_4\text{N}]\text{PF}_6$  as supporting electrolyte. Scan rate employed:  $0.1 \text{ V s}^{-1}$ .

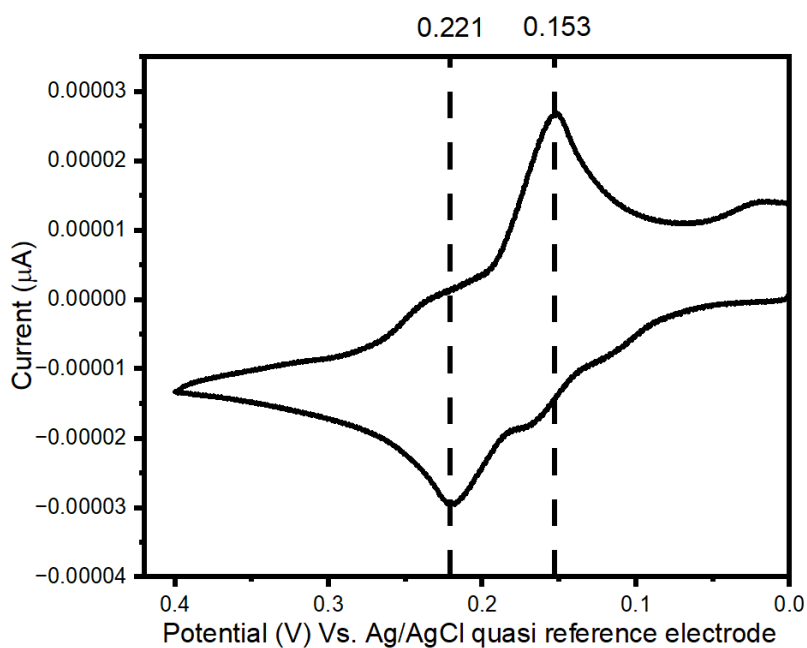

Figure S10. Evolution of CV of **6** with internal ferrocene standard.

**Compound 7**

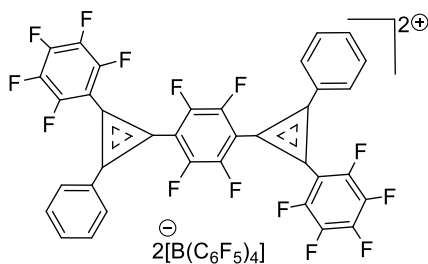

$$E_{\text{Red(I)}} = (-0.006 + 0.061) \text{ V} = -0.07 \text{ V}$$

$$E_{\text{Red(II)}} = (0.193 + 0.061) \text{ V} = 0.25 \text{ V}$$

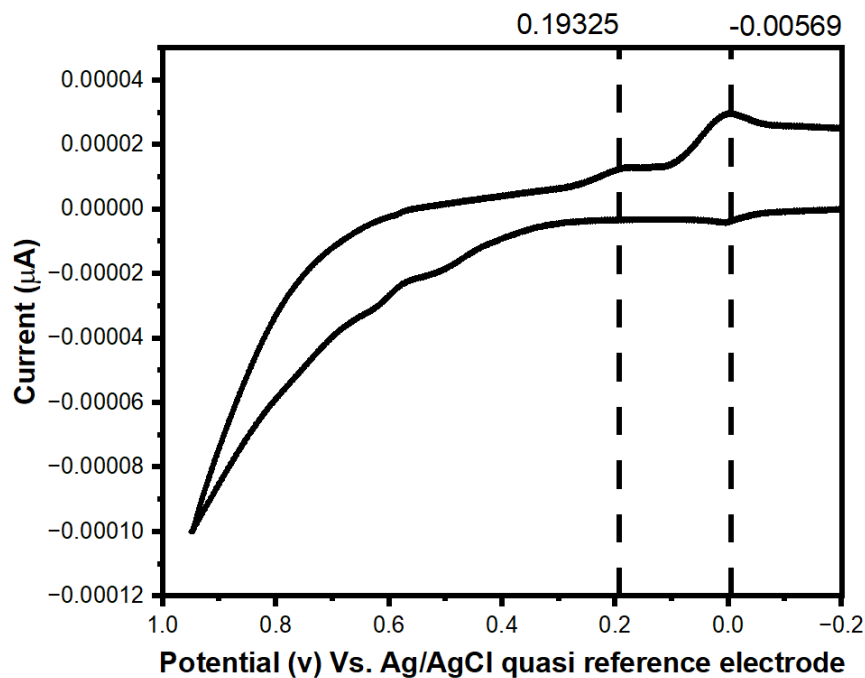

Figure S11. Evolution of CV of 7 (0.1 M) in  $\text{CH}_3\text{CN}/\text{DCM}$  (1:1) with  $[(n\text{-Bu})_4\text{N}]\text{PF}_6$  as supporting electrolyte. Scan rate employed:  $0.1 \text{ V s}^{-1}$ .

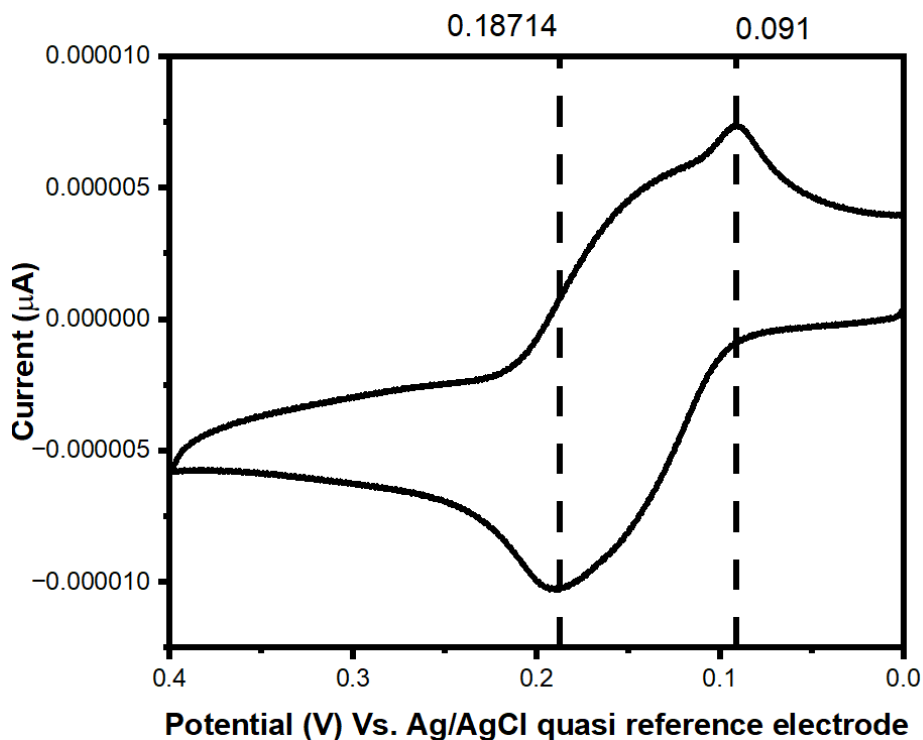

Figure S12. Evolution of CV of 7 with internal ferrocene standard.

## NMR spectra of all the compounds

### Compound 1

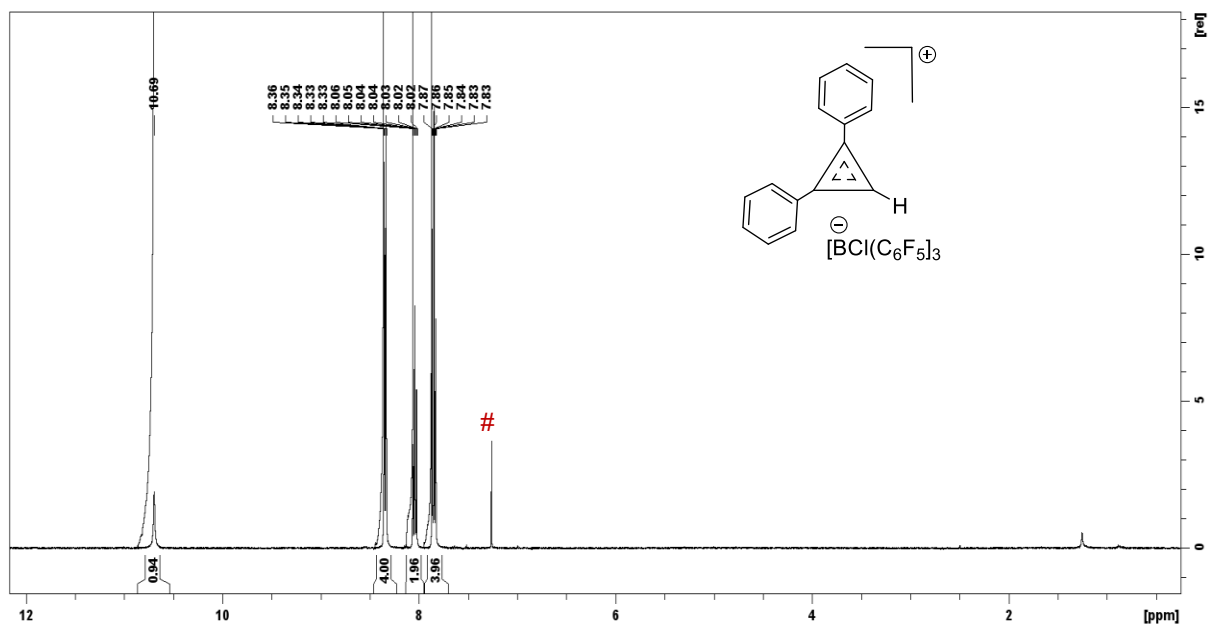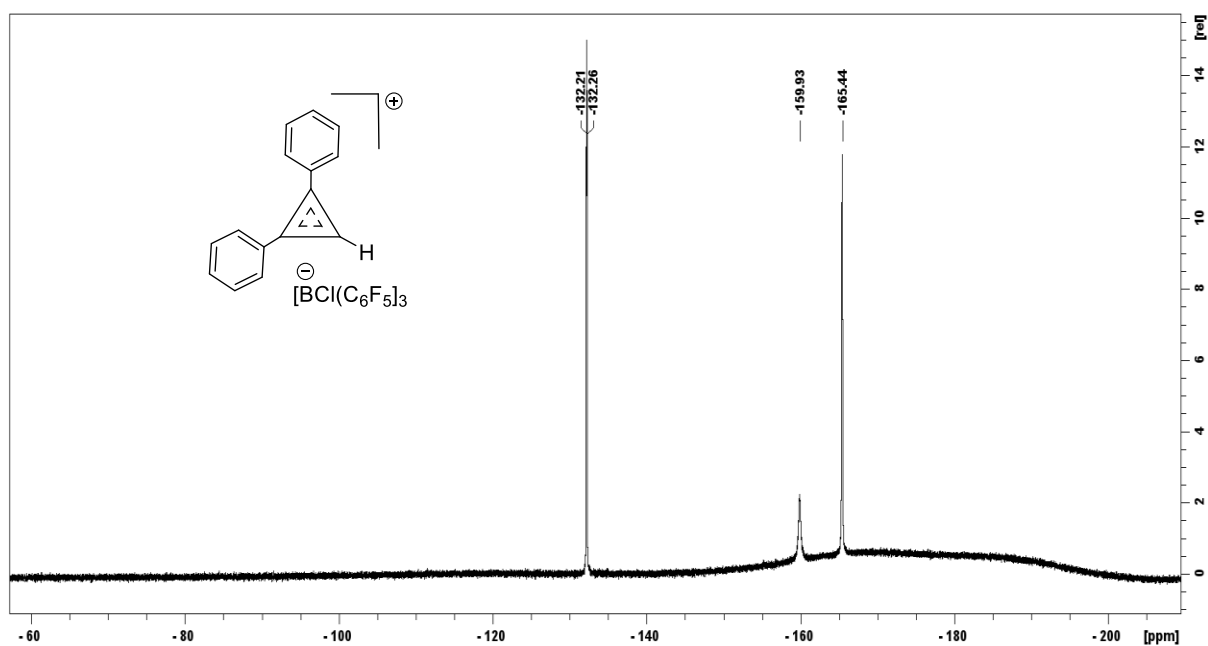

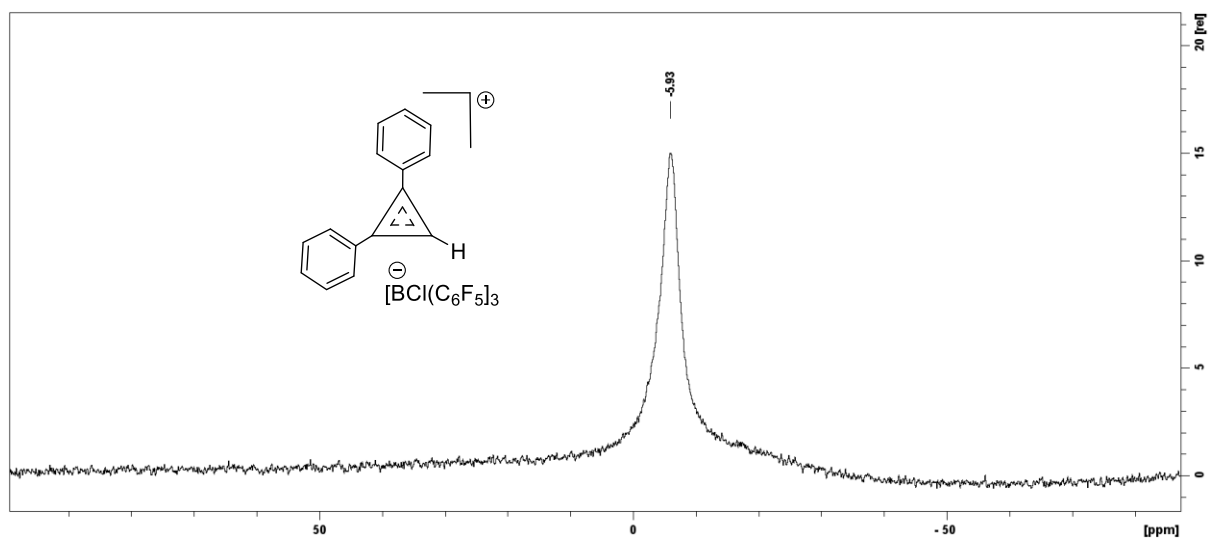

Figure S15.  $^{11}\text{B}$  NMR (128 MHz) spectrum of the compound **1** in  $\text{CDCl}_3$ .

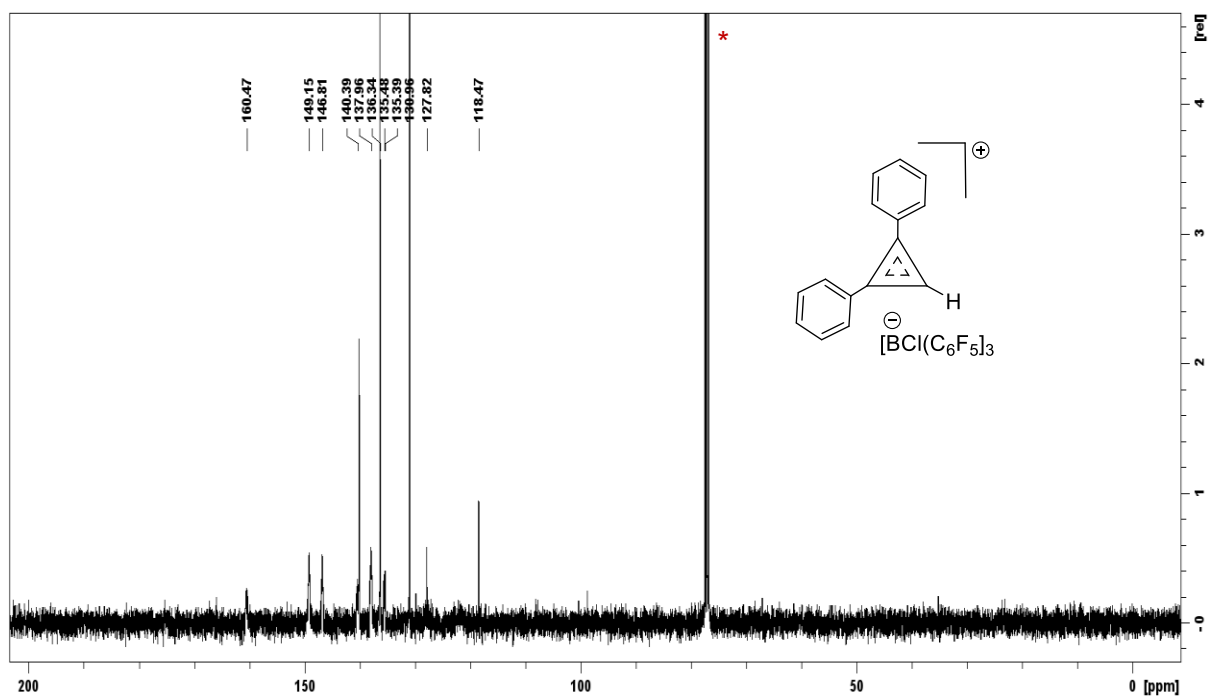

Figure S16.  $^{13}\text{C}$  NMR (101 MHz) spectrum of the compound **1** in  $\text{CDCl}_3$  (\* =  $\text{CDCl}_3$ ).

## Compound 2a

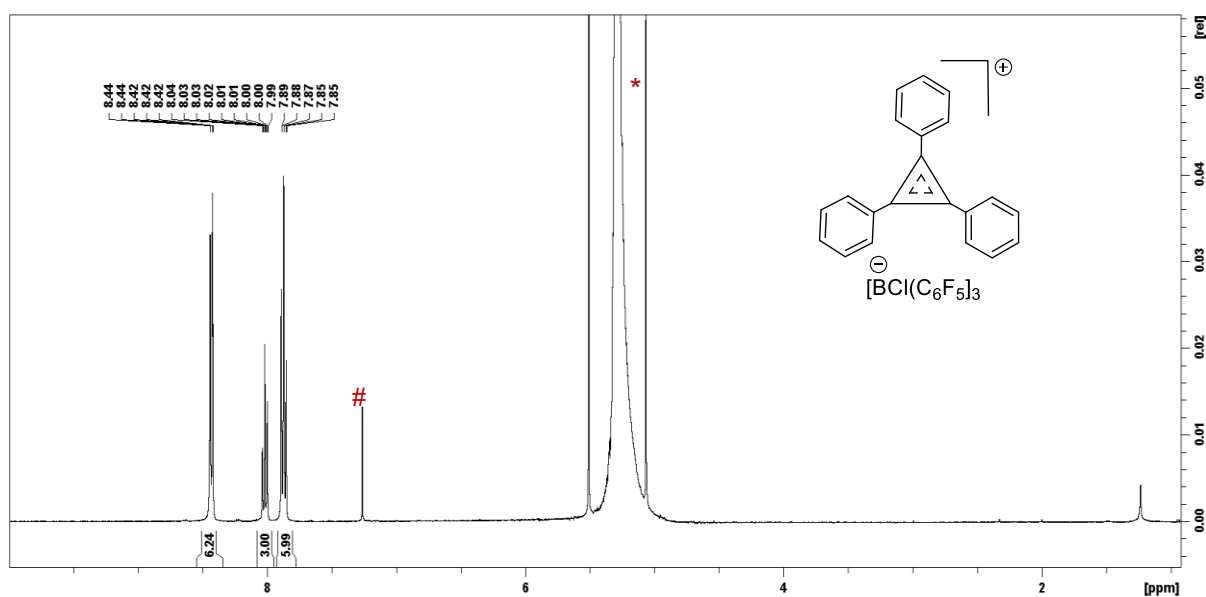

Figure S17. <sup>1</sup>H NMR (500 MHz) spectrum of the compound **2a** in CDCl<sub>3</sub>/CH<sub>2</sub>Cl<sub>2</sub> (1:5) (#= CDCl<sub>3</sub>; \*= CH<sub>2</sub>Cl<sub>2</sub>).

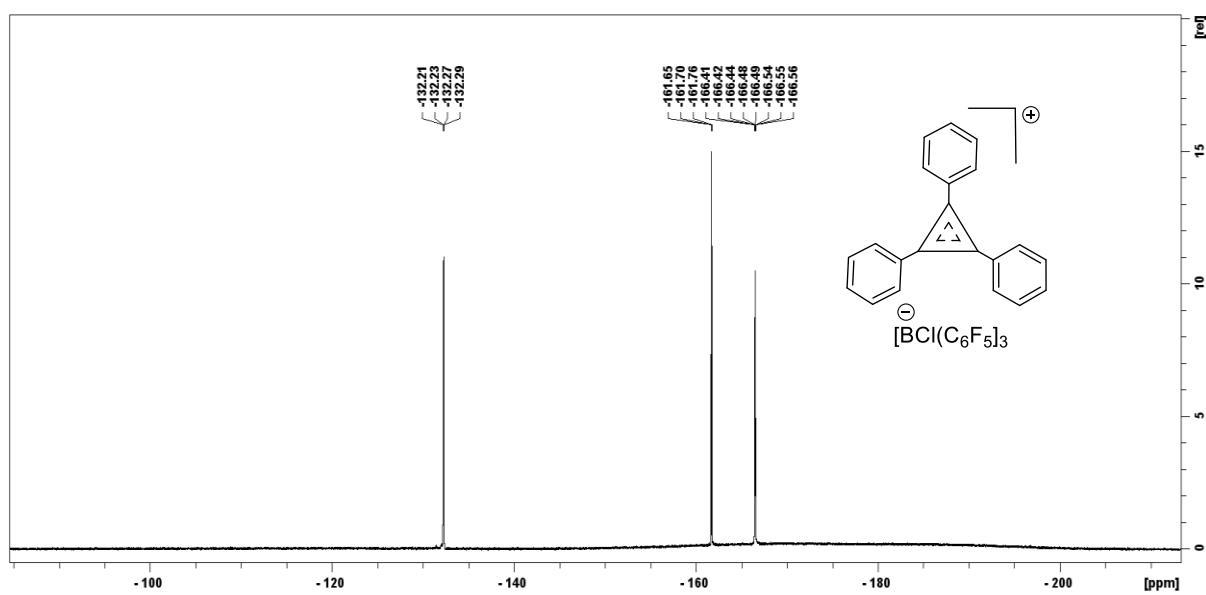

Figure S18. <sup>19</sup>F NMR (471 MHz) spectrum of the compound **2a** in CDCl<sub>3</sub>/CH<sub>2</sub>Cl<sub>2</sub> (1:5).



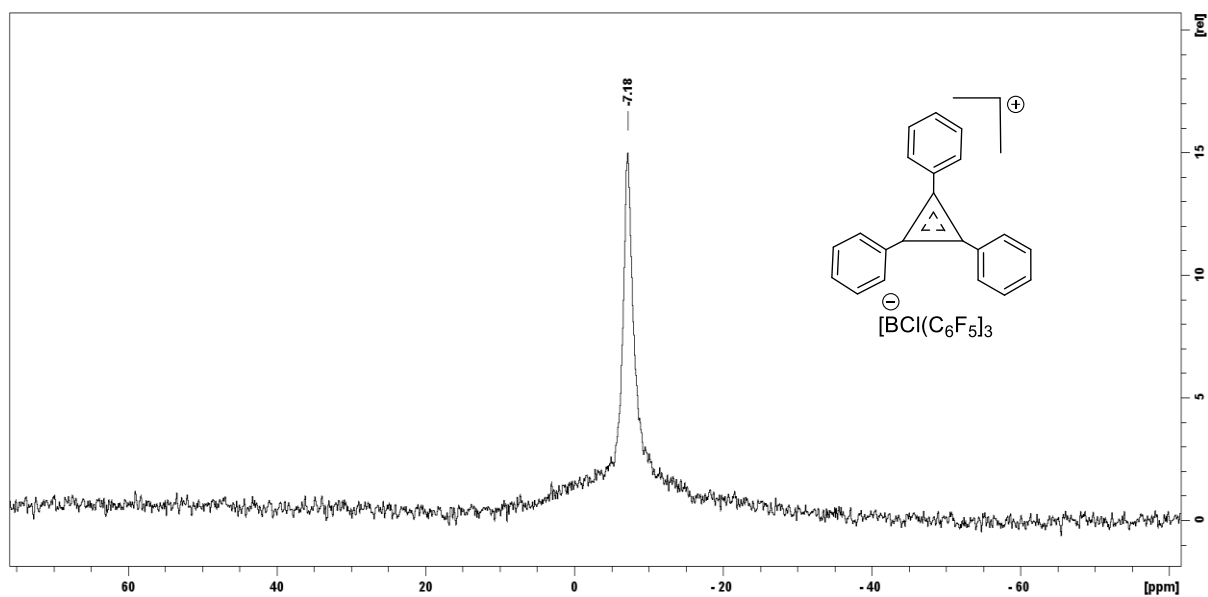

Figure S19.  $^{11}\text{B}$  NMR (161 MHz) spectrum of the compound **2a** in  $\text{CDCl}_3/\text{CH}_2\text{Cl}_2$  (1:5).

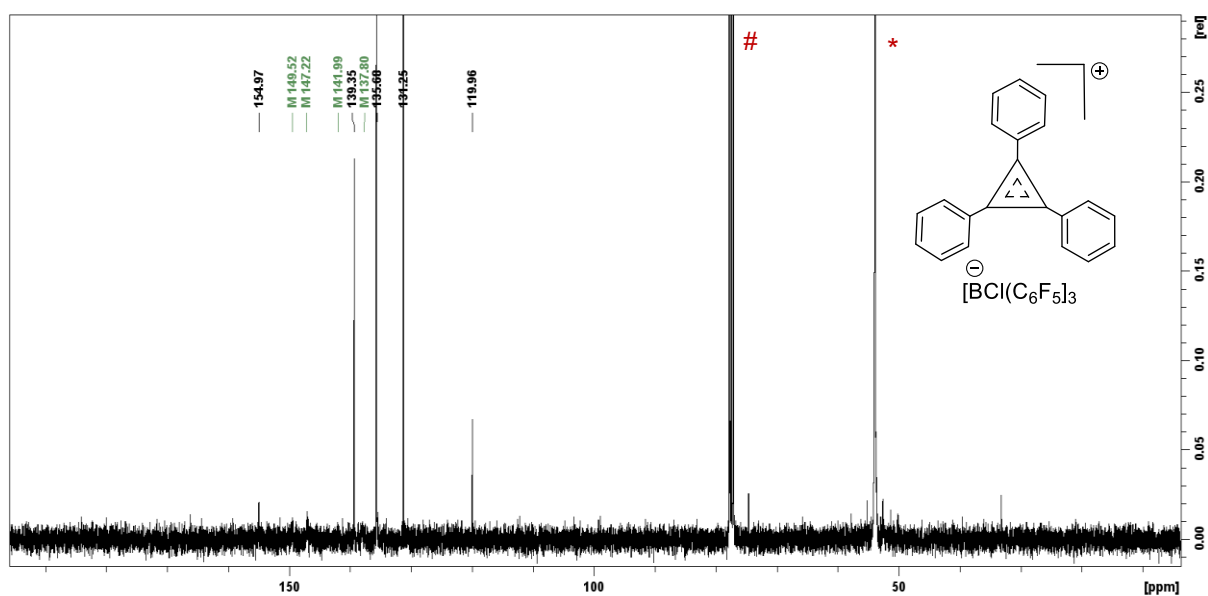

Figure S20.  $^{13}\text{C}$  NMR (126 MHz) spectrum of the compound **2a** in  $\text{CDCl}_3/\text{CH}_2\text{Cl}_2$  (1:5) (# =  $\text{CDCl}_3$ ; \* =  $\text{CH}_2\text{Cl}_2$ ).

## Compound 2b

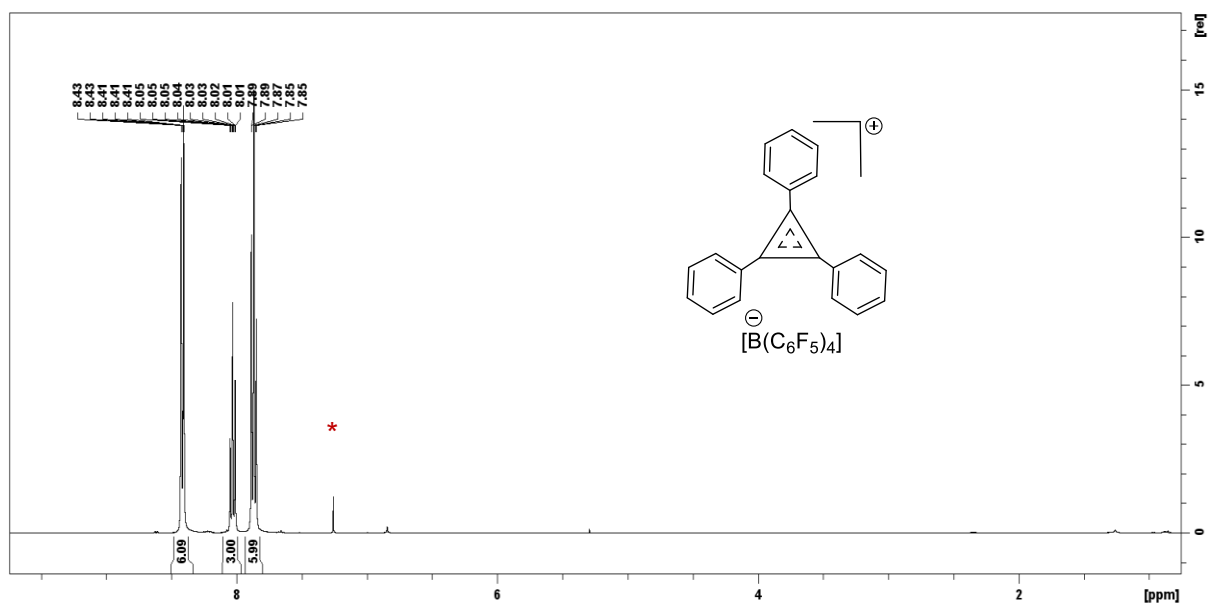

Figure S21.  $^1\text{H}$  NMR (400 MHz) spectrum of the compound **2b** in  $\text{CDCl}_3$  (\* =  $\text{CDCl}_3$ ).

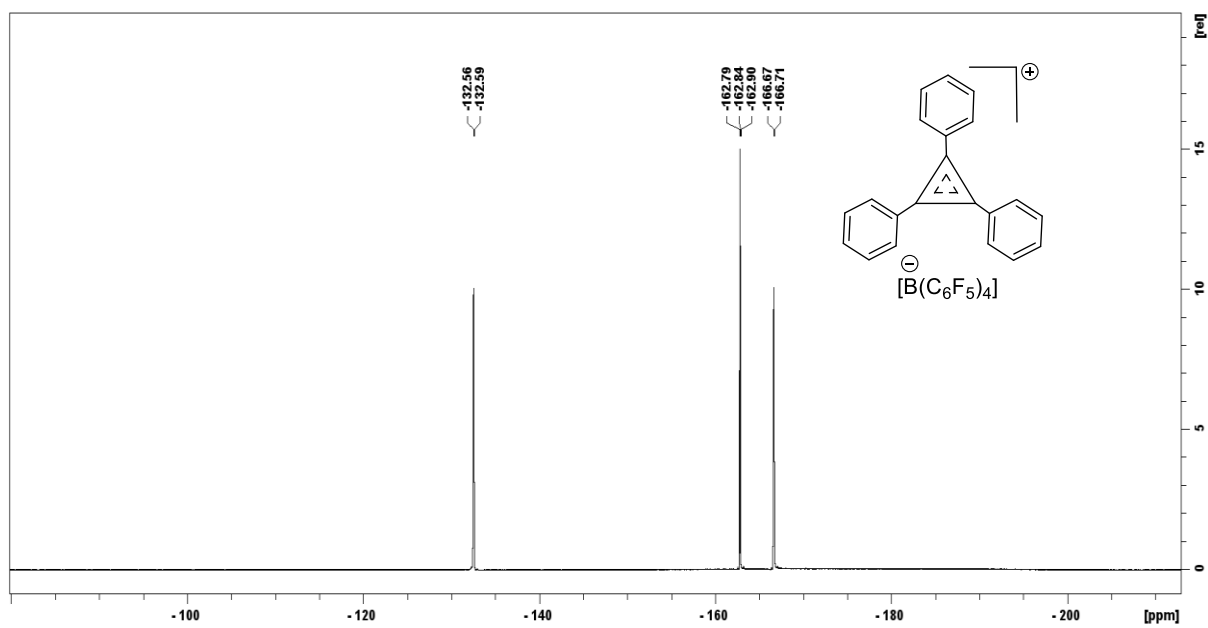

Figure S22.  $^{19}\text{F}$  NMR (377 MHz) spectrum of the compound **2b** in  $\text{CDCl}_3$ .

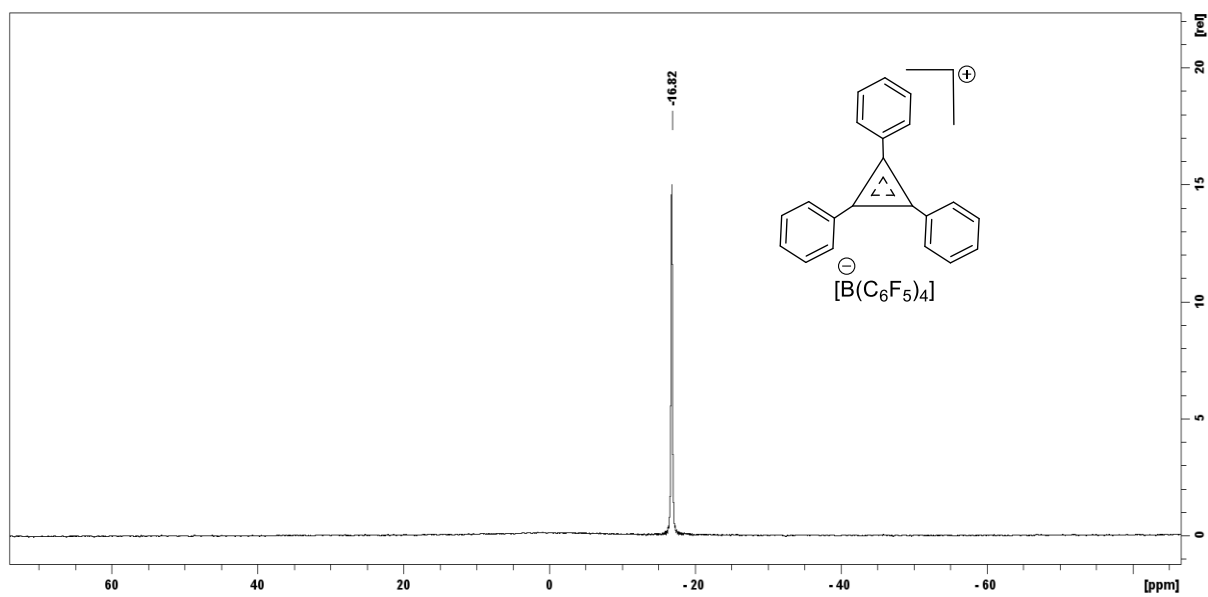

Figure S23.  $^{11}\text{B}$  NMR (128 MHz) spectrum of the compound **2b** in  $\text{CDCl}_3$ .

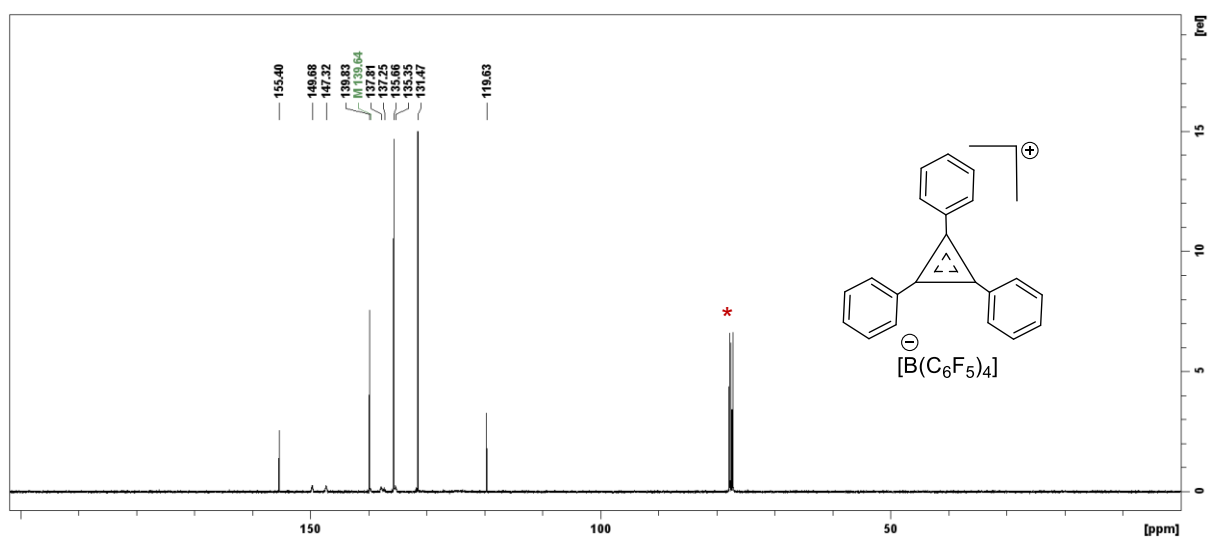

Figure S24.  $^{13}\text{C}$  NMR (101 MHz) spectrum of the compound **2b** in  $\text{CDCl}_3$  (\* =  $\text{CDCl}_3$ ).

## Compound 2c

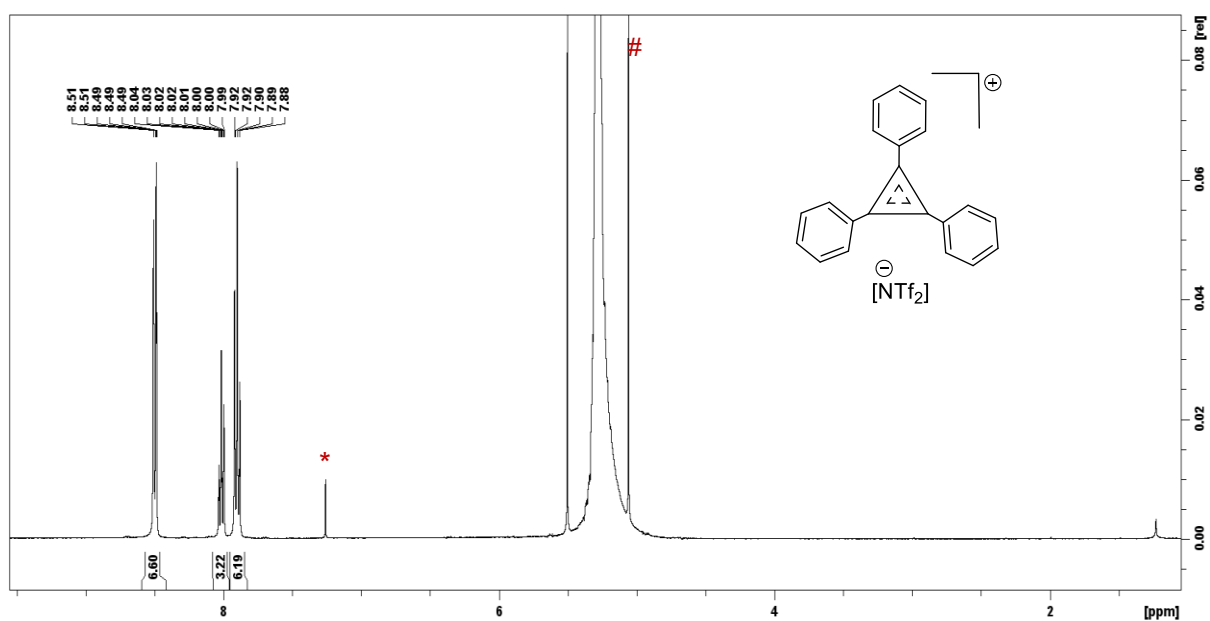

Figure S25. <sup>1</sup>H NMR (400 MHz) spectrum of the compound **2c** in CDCl<sub>3</sub>/CH<sub>2</sub>Cl<sub>2</sub> (1:5) (\* = CDCl<sub>3</sub>; # = CH<sub>2</sub>Cl<sub>2</sub>).

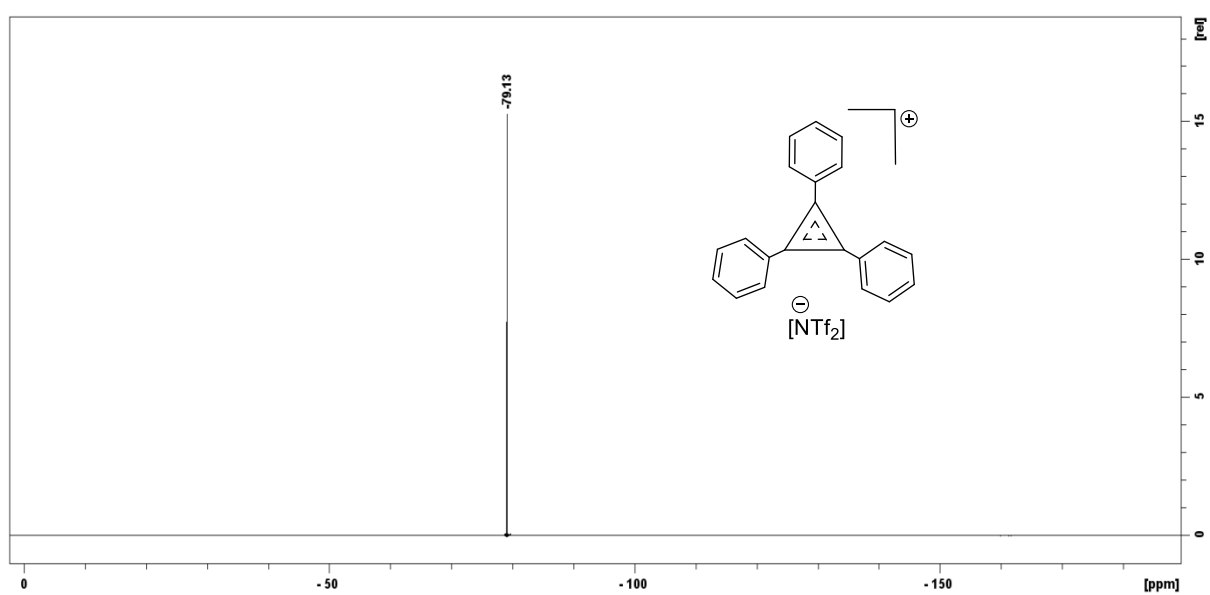

Figure S26. <sup>19</sup>F NMR (377 MHz) spectrum of the compound **2c** in CDCl<sub>3</sub>/CH<sub>2</sub>Cl<sub>2</sub> (1:5).

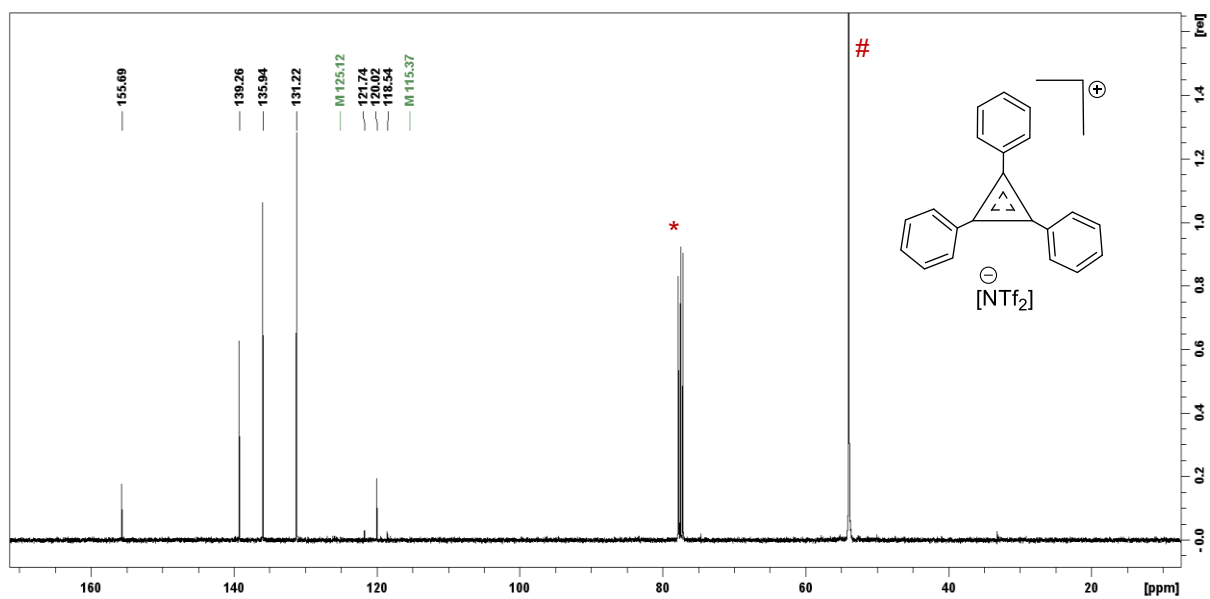

Figure S27.  $^{13}\text{C}$  NMR (101 MHz) spectrum of the compound **2c** in  $\text{CDCl}_3/\text{CH}_2\text{Cl}_2$  (1:5) (\* =  $\text{CDCl}_3$ ; # =  $\text{CH}_2\text{Cl}_2$ ).

## Compound 3

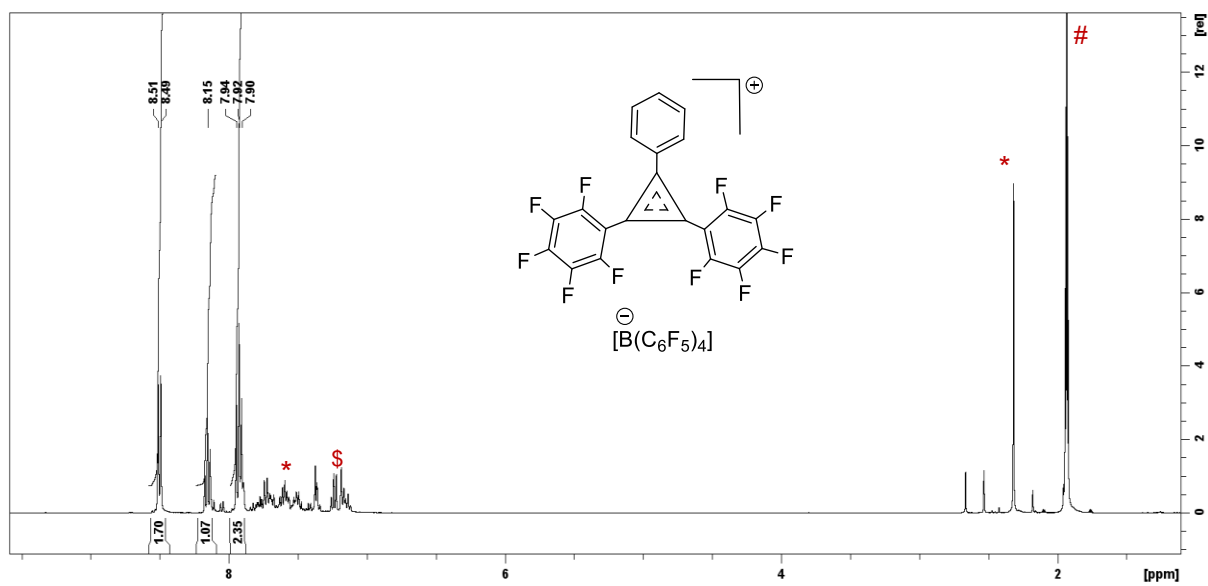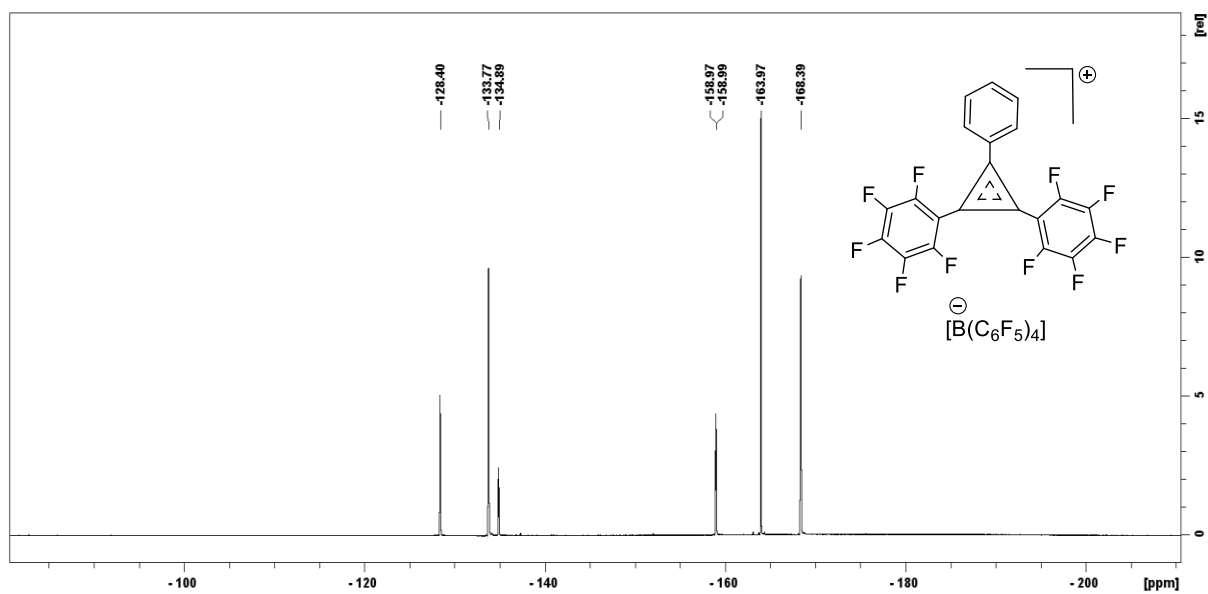

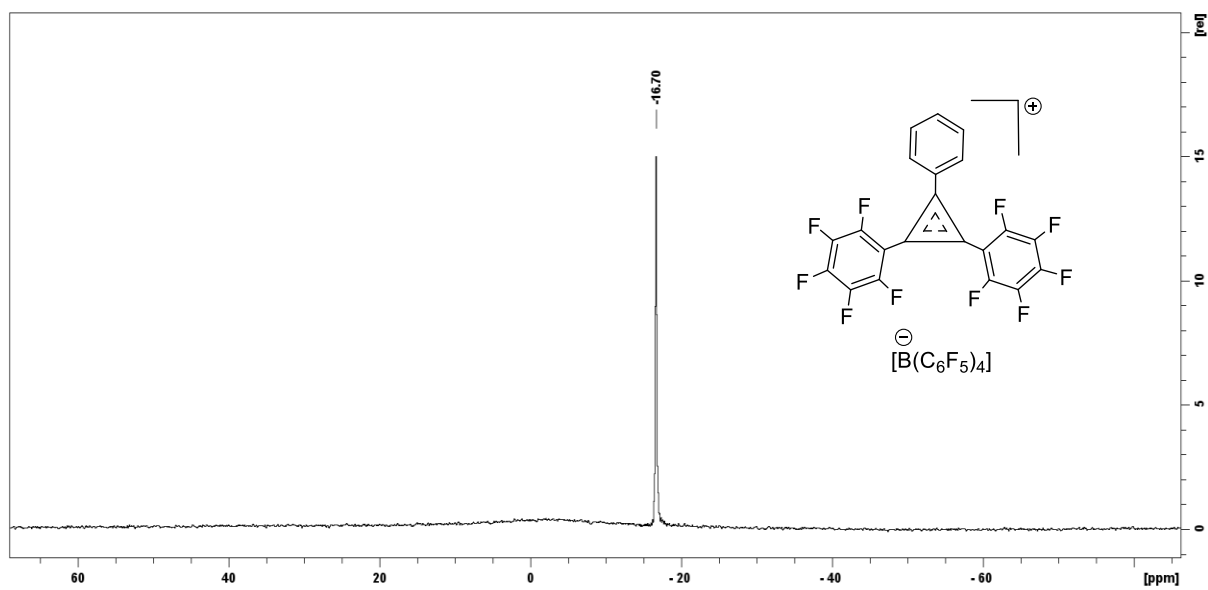

Figure S30.  $^{11}\text{B}$  NMR (128 MHz) spectrum of the compound **3** in  $\text{CD}_3\text{CN}$ .

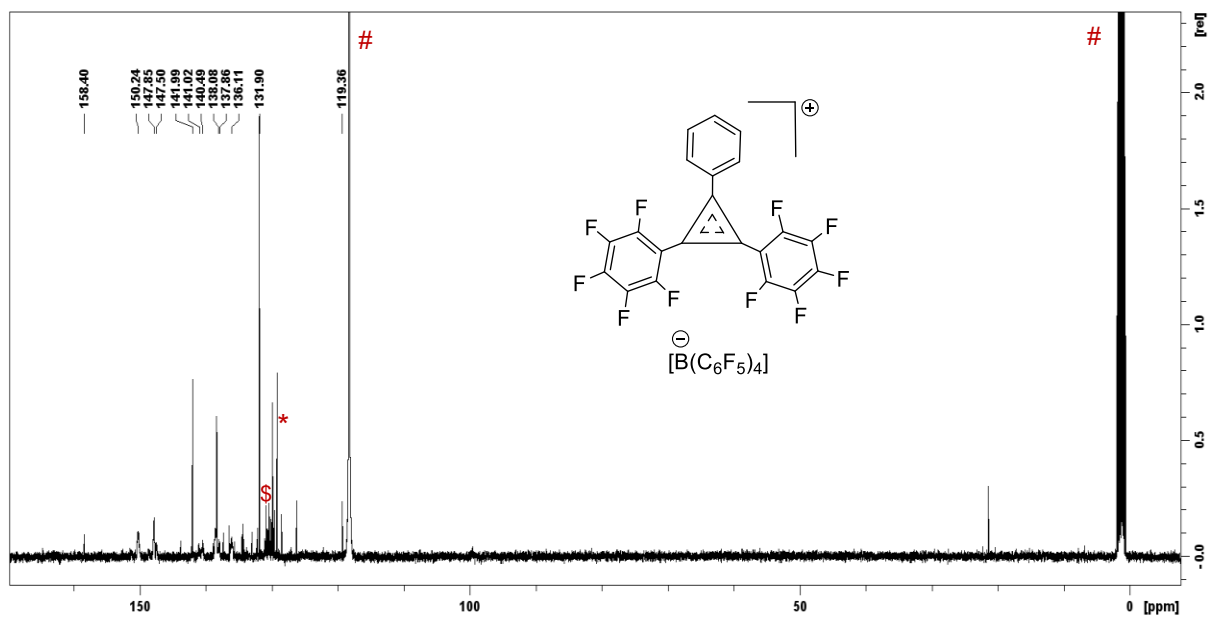

Figure S31.  $^{13}\text{C}$  NMR (101 MHz) spectrum of the compound **3** in  $\text{CD}_3\text{CN}$  (\*= residual toluene; \$= unidentified impurities; #=  $\text{CD}_3\text{CN}$ ).

## Compound 4a

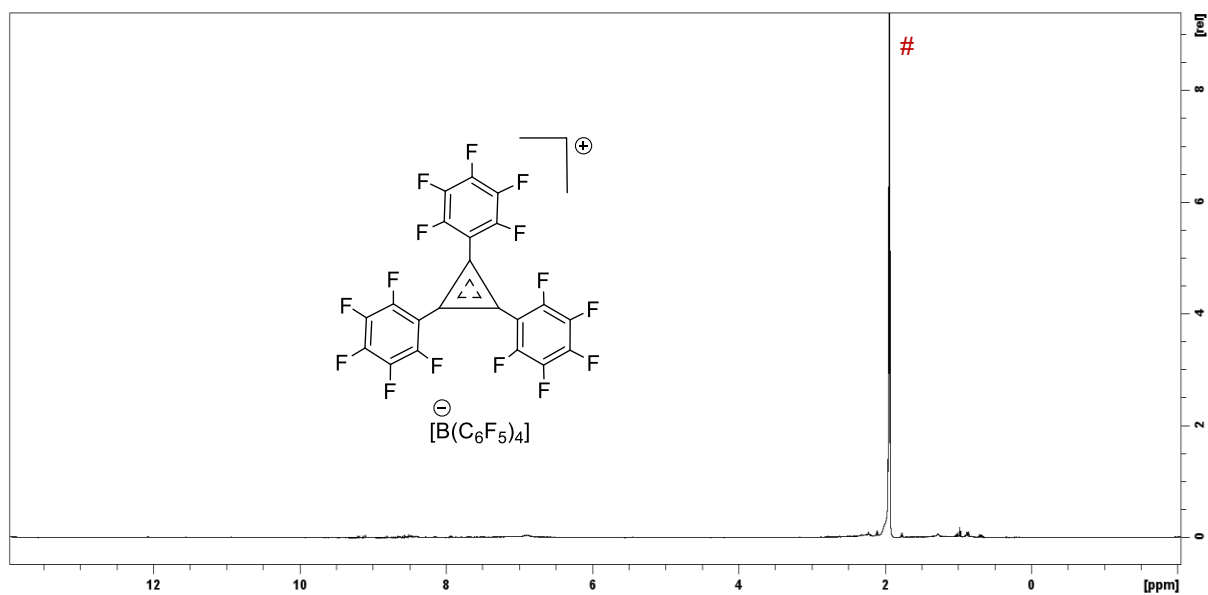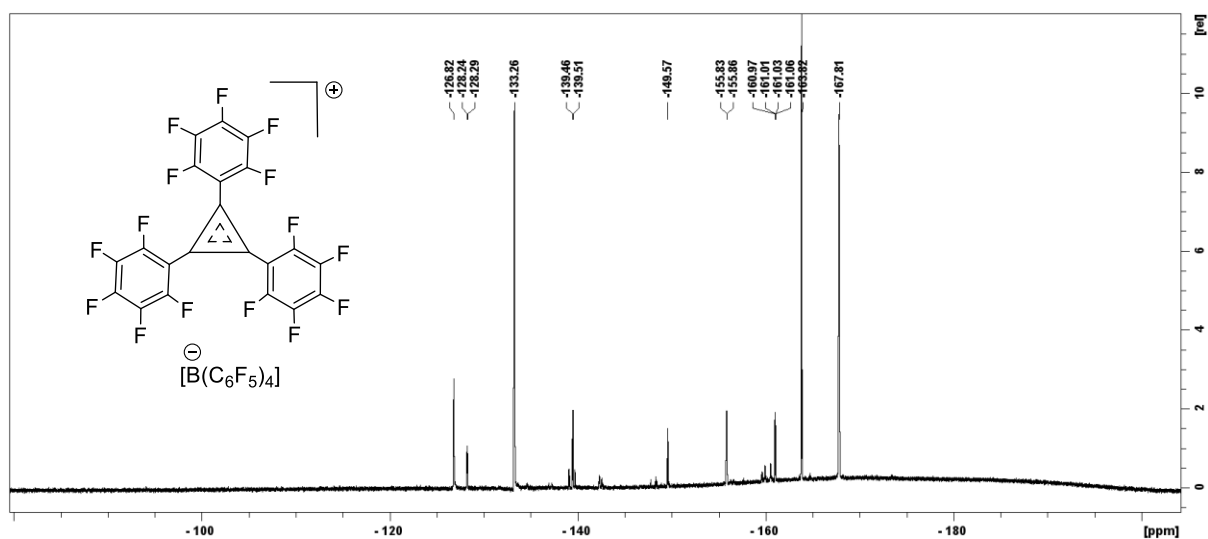



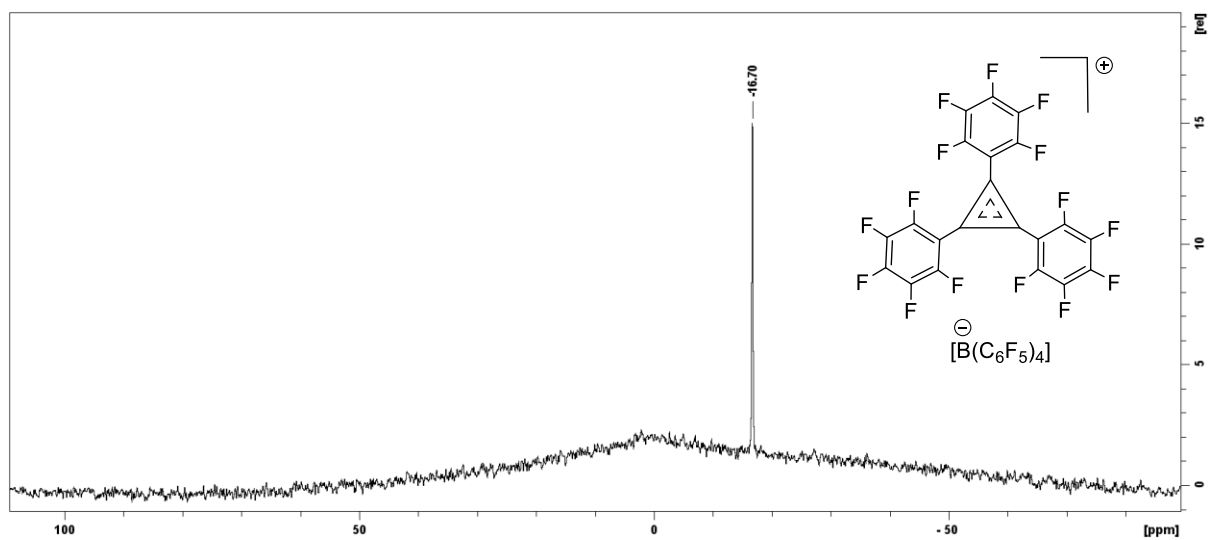

Figure S34.  $^{11}\text{B}$  NMR (128 MHz) spectrum of the compound **4a** in  $\text{CD}_3\text{CN}$ .

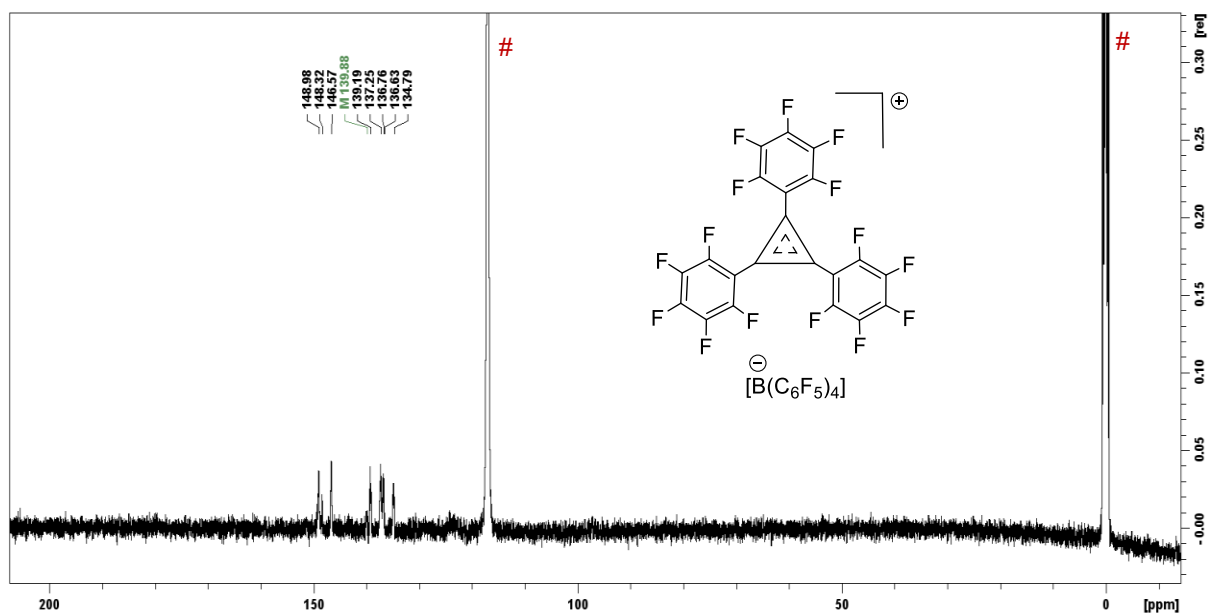

Figure S35.  $^{13}\text{C}$  NMR (101 MHz) spectrum of the compound **4a** in  $\text{CD}_3\text{CN}$  (# =  $\text{CD}_3\text{CN}$ ).

## Compound 4b

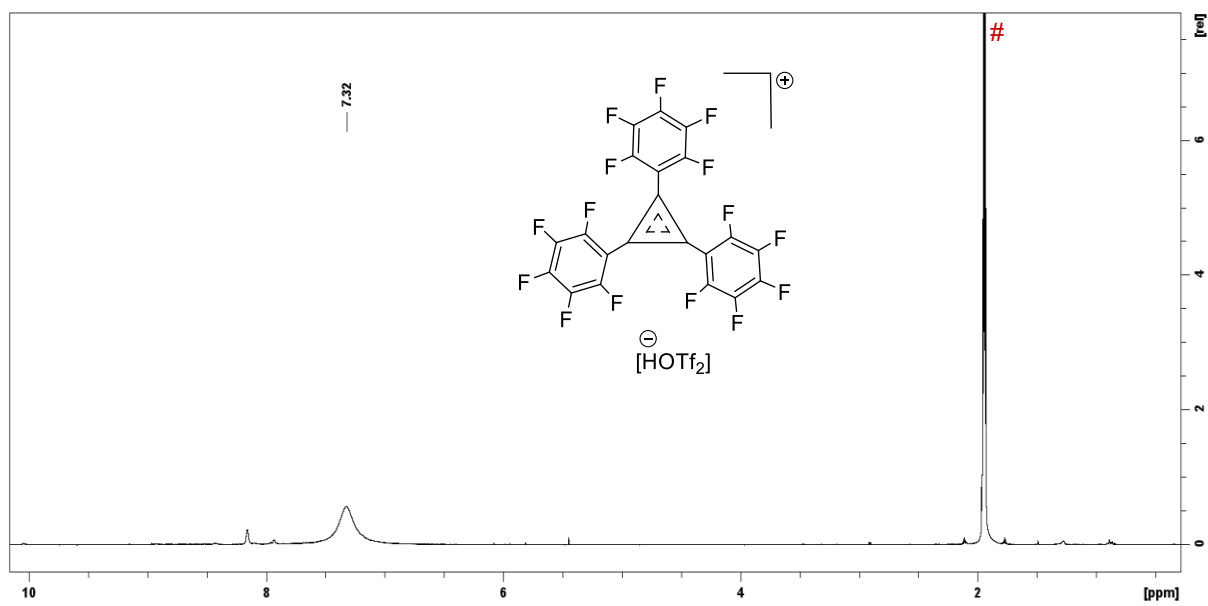

Figure S36.  $^1\text{H}$  NMR (400 MHz) spectrum of the compound **4b** in  $\text{CD}_3\text{CN}$  ( $\# = \text{CD}_3\text{CN}$ ).

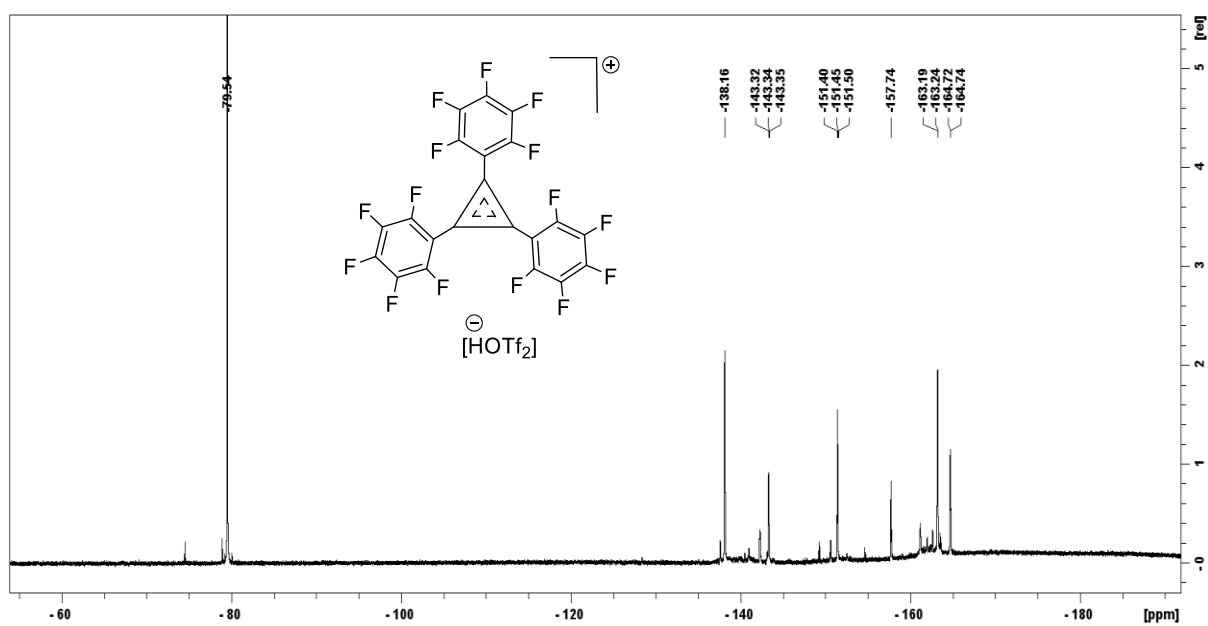

Figure S37.  $^{19}\text{F}$  NMR (377 MHz) spectrum of the compound **4b** in  $\text{CD}_3\text{CN}$ .

## Compound 5

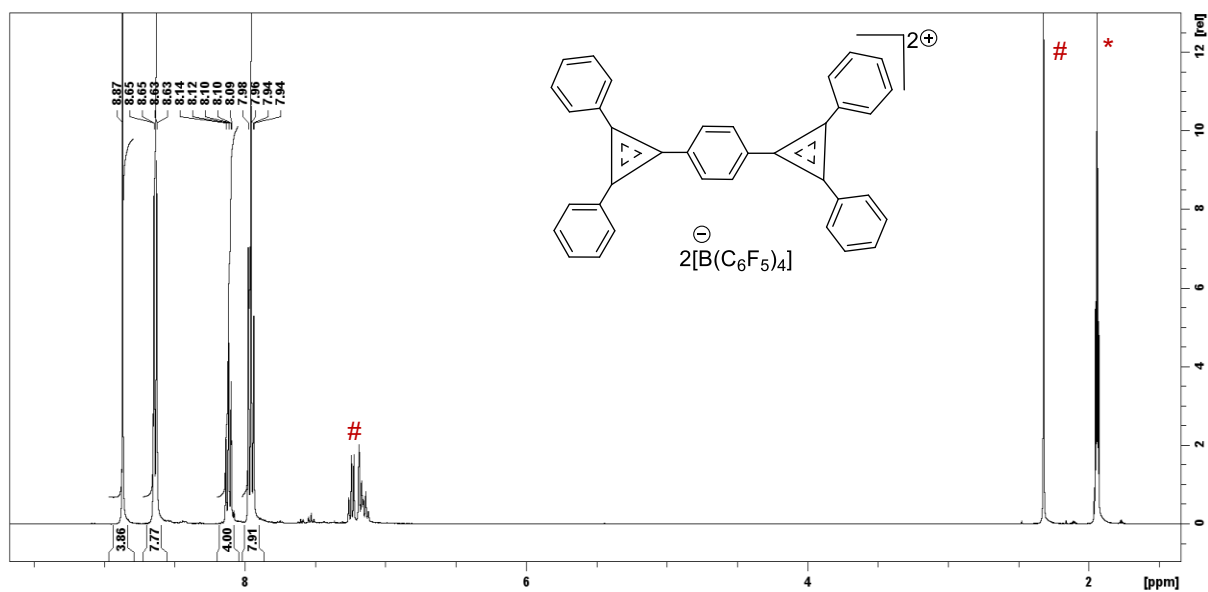

Figure S38.  $^1\text{H}$  NMR (400 MHz) spectrum of the compound **5** in  $\text{CD}_3\text{CN}$  (\*=  $\text{CD}_3\text{CN}$ , #= residual toluene).

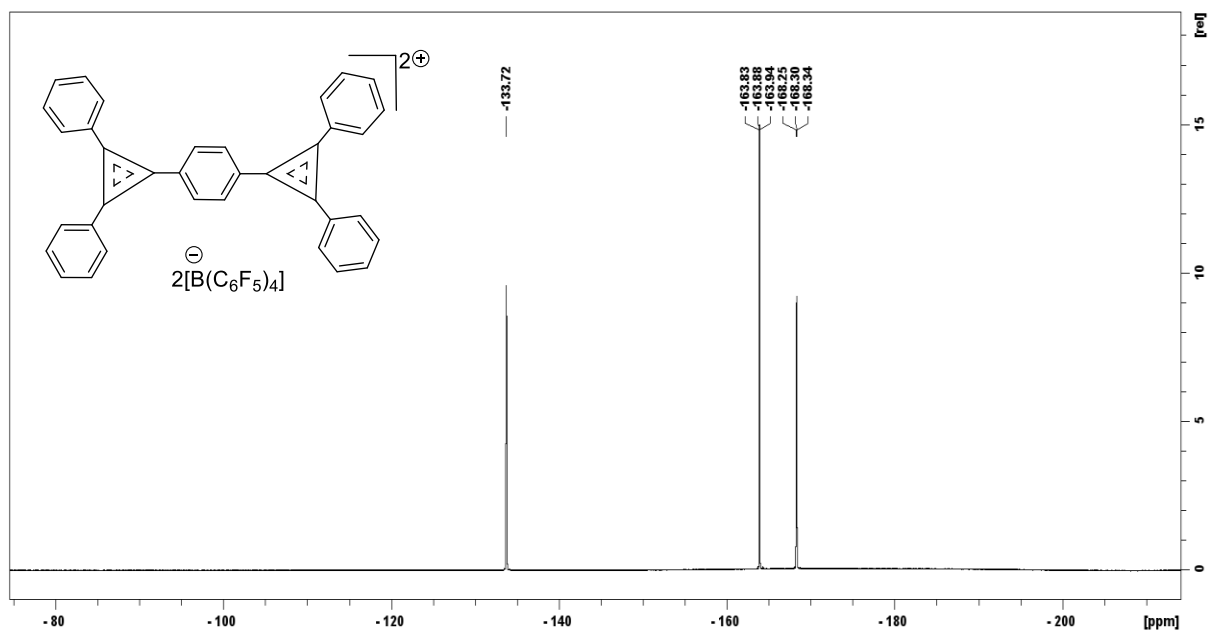

Figure S39.  $^{19}\text{F}$  NMR (377 MHz) spectrum of the compound **5** in  $\text{CD}_3\text{CN}$ .

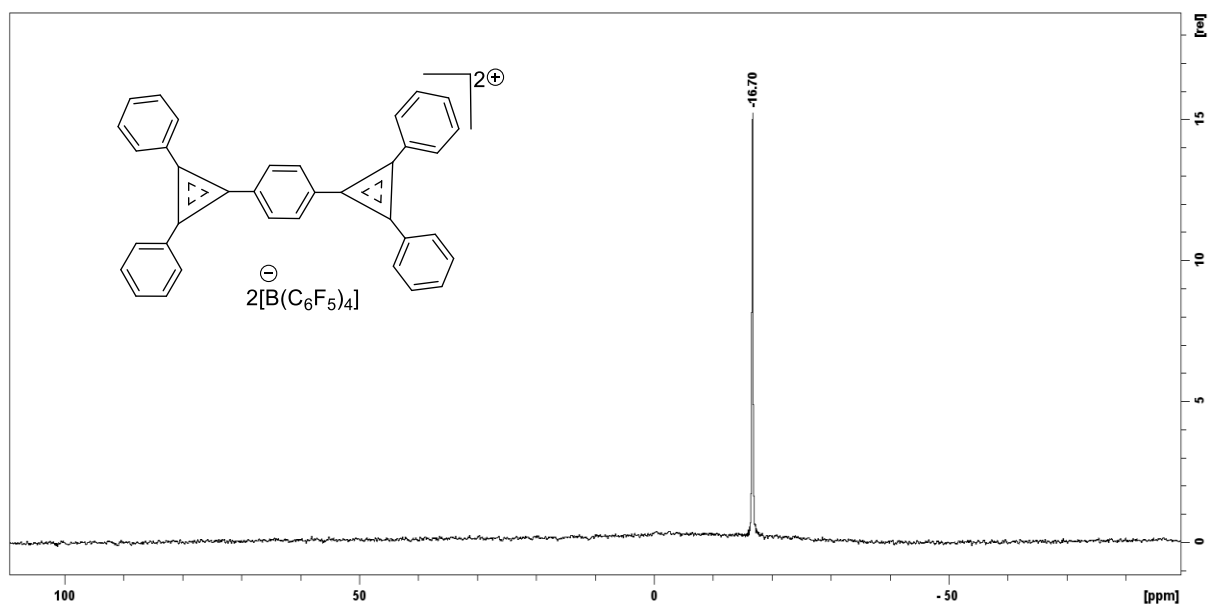

Figure S40.  $^{11}\text{B}$  NMR (128 MHz) spectrum of the compound **5** in  $\text{CD}_3\text{CN}$ .

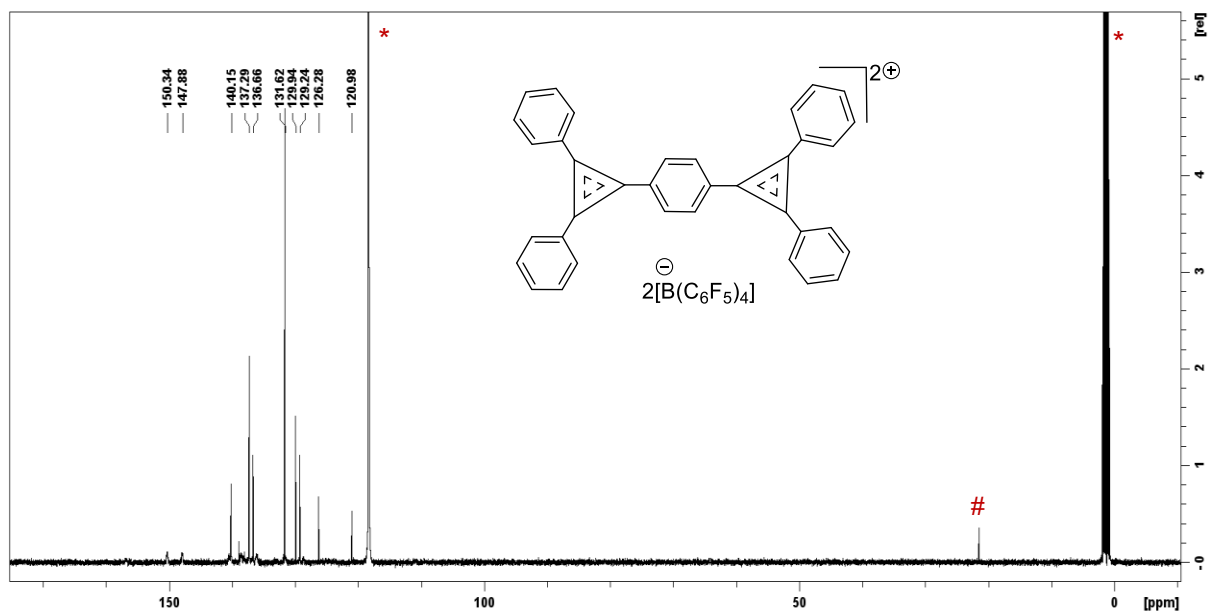

Figure S41.  $^{13}\text{C}$  NMR (101 MHz) spectrum of the compound **5** in  $\text{CD}_3\text{CN}$  (\* =  $\text{CD}_3\text{CN}$ , # = residual toluene).

## Compound 6

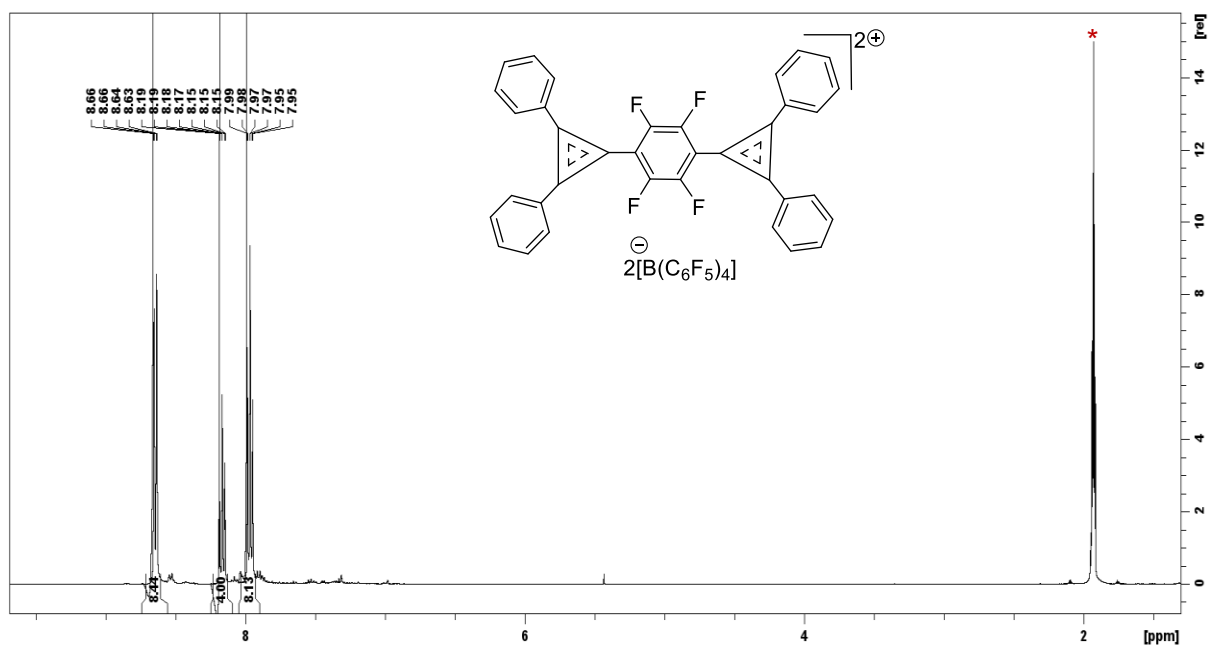

Figure S42.  $^1\text{H}$  NMR (500 MHz) spectrum of the compound 6 in  $\text{CD}_3\text{CN}$  (\* =  $\text{CD}_3\text{CN}$ ).

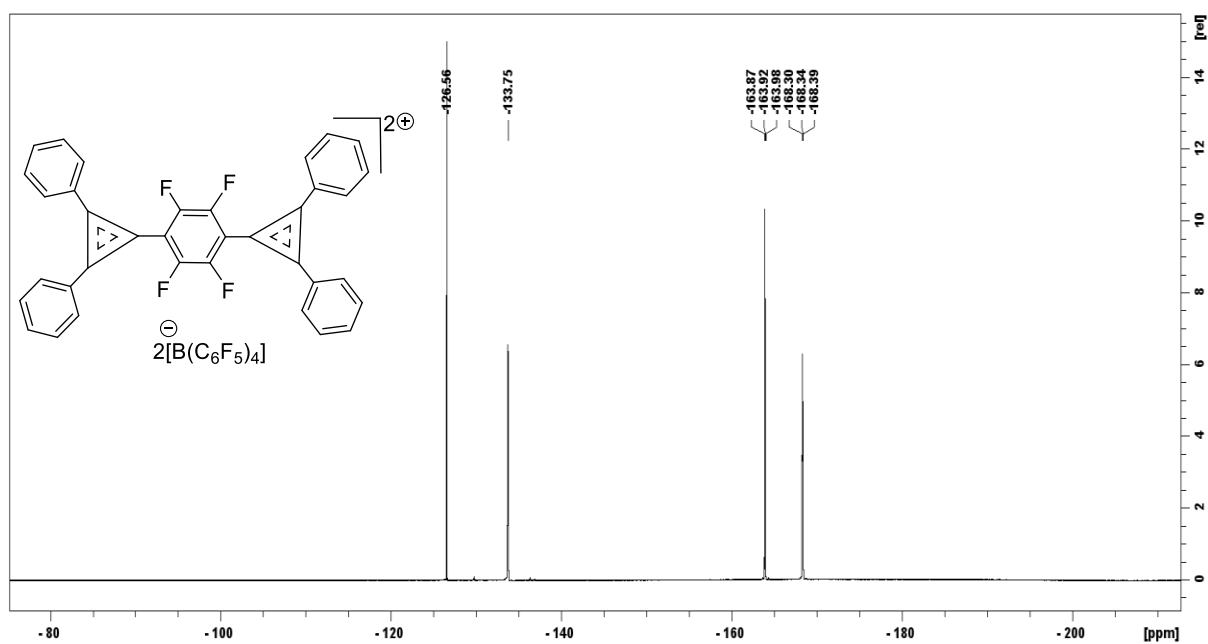

Figure S43.  $^{19}\text{F}$  NMR (377 MHz) spectrum of the compound 6 in  $\text{CD}_3\text{CN}$ .

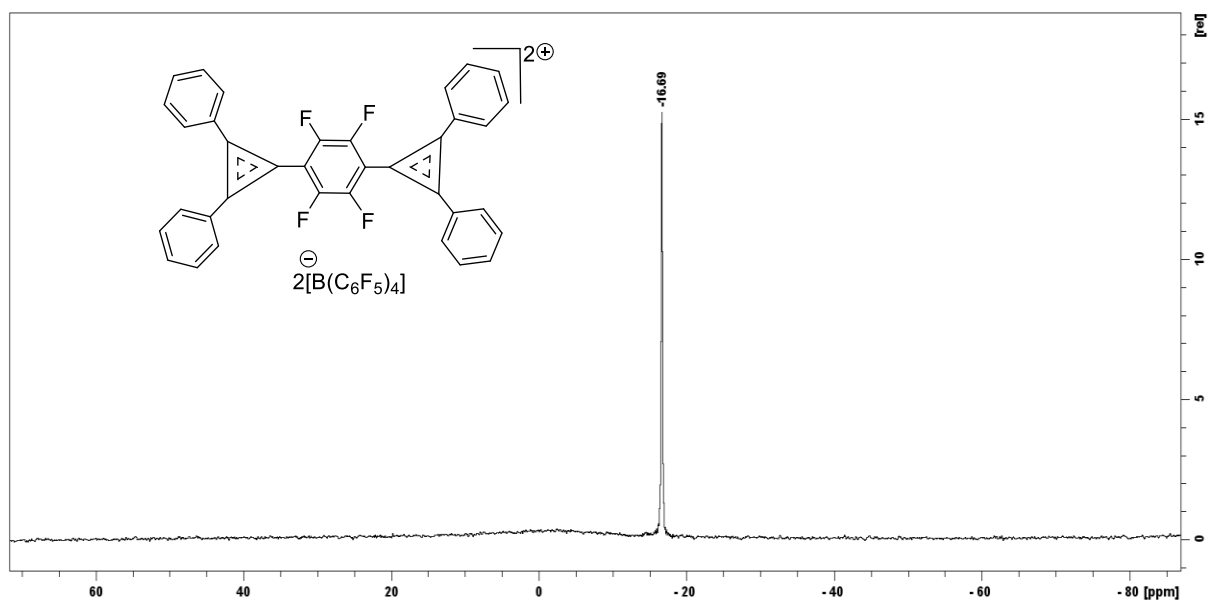

Figure S44.  $^{11}\text{B}$  NMR (161 MHz) spectrum of the compound **6** in  $\text{CD}_3\text{CN}$ .

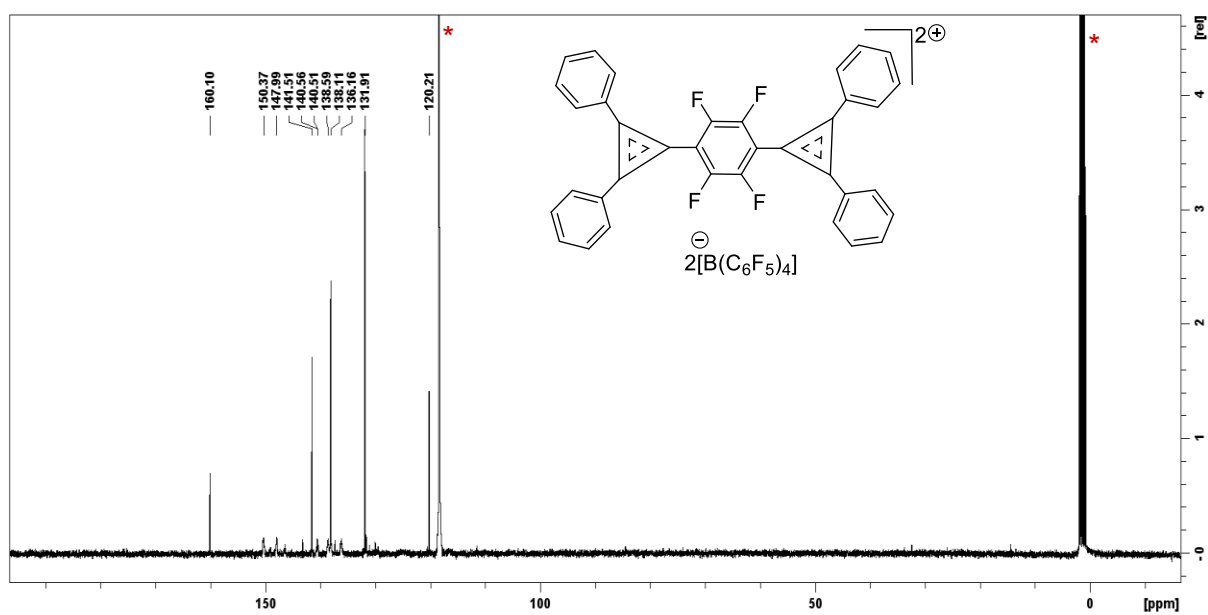

Figure S45.  $^{13}\text{C}$  NMR (101 MHz) spectrum of the compound **6** in  $\text{CD}_3\text{CN}$  (\* =  $\text{CD}_3\text{CN}$ ).

## Compound 7

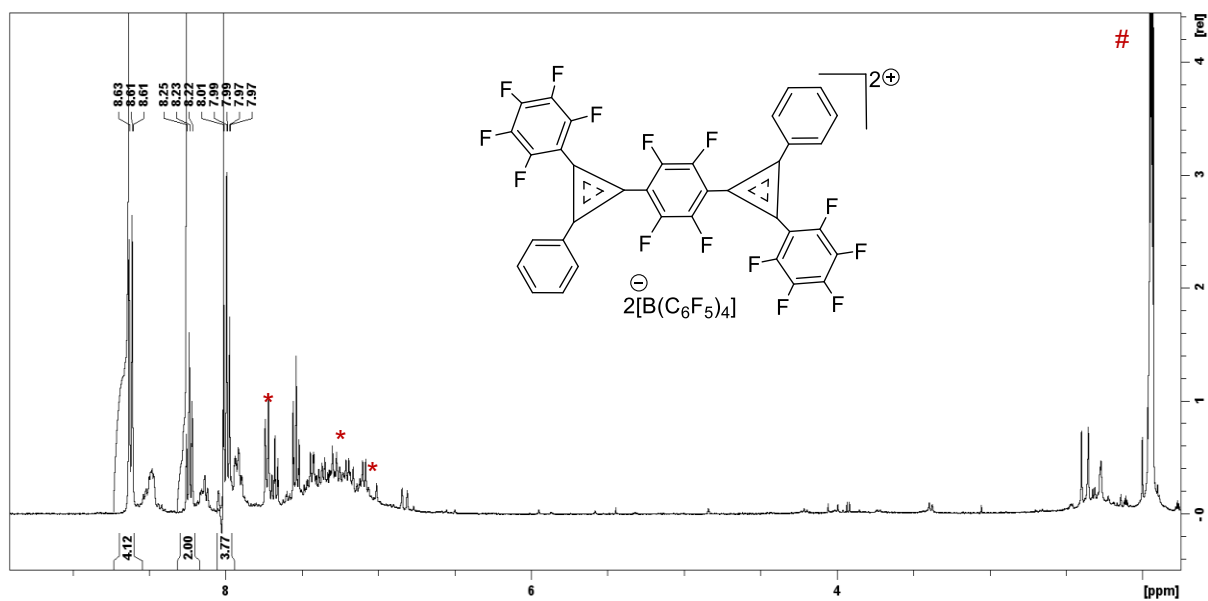

Figure S46.  $^1H$  NMR (400 MHz) spectrum of the compound **7** in  $CD_3CN$  (\*= unidentified impurities; #=  $CD_3CN$ ).

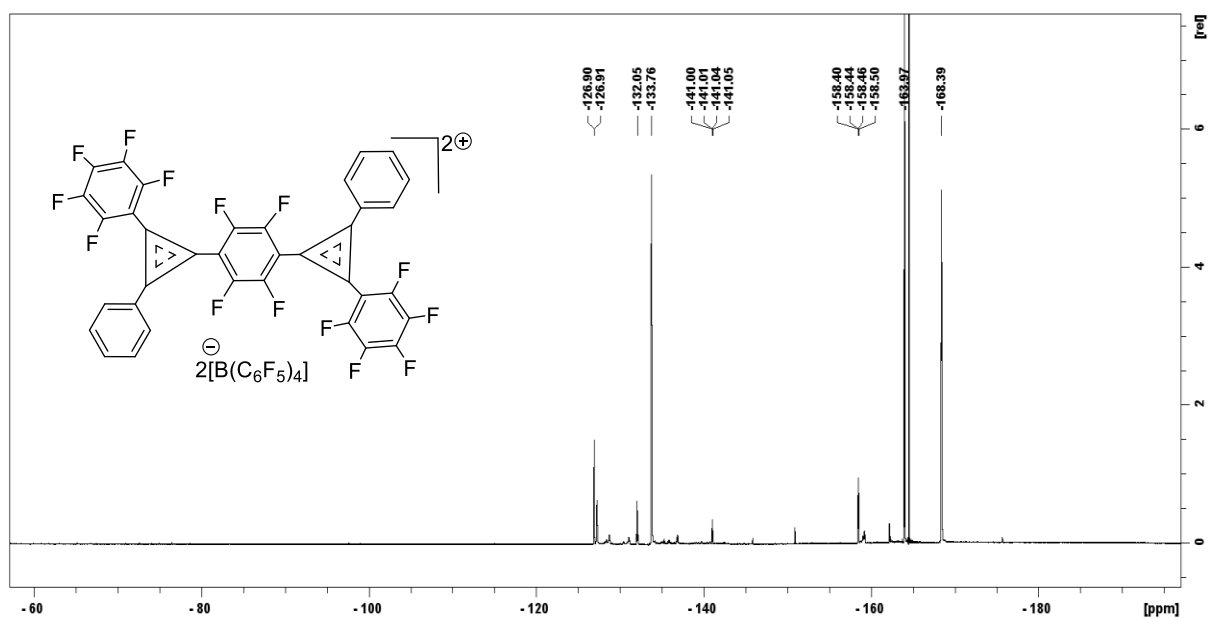

Figure S47.  $^{19}F$  NMR (377 MHz) spectrum of the compound **7** in  $CD_3CN$ .

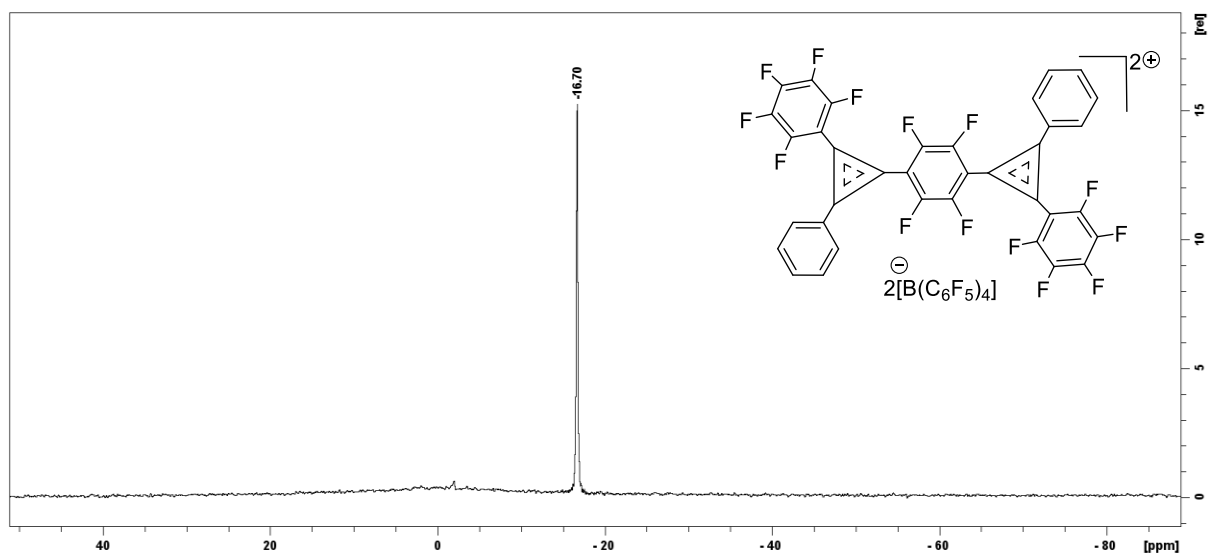

Figure S48.  $^{11}\text{B}$  NMR (128 MHz) spectrum of the compound **7** in  $\text{CD}_3\text{CN}$ .

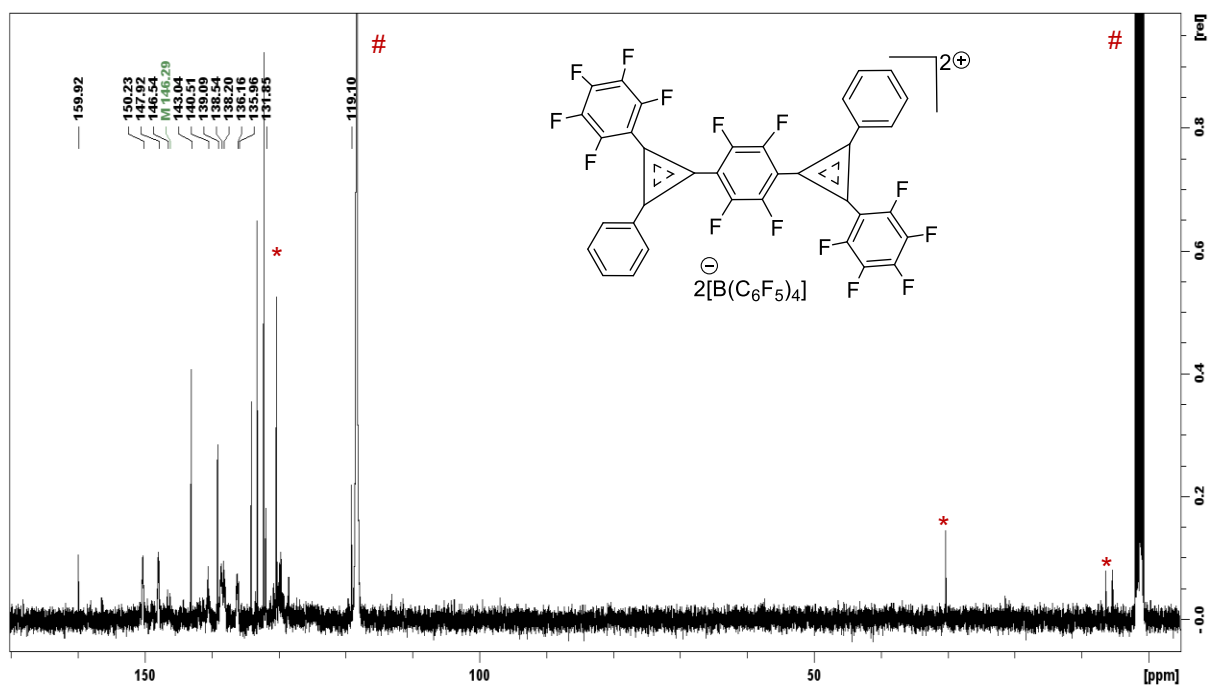

Figure S49.  $^{13}\text{C}$  NMR (101 MHz) spectrum of the compound **7** in  $\text{CD}_3\text{CN}$  (\*= unidentified impurities, #=  $\text{CD}_3\text{CN}$ ).



## Compound 8

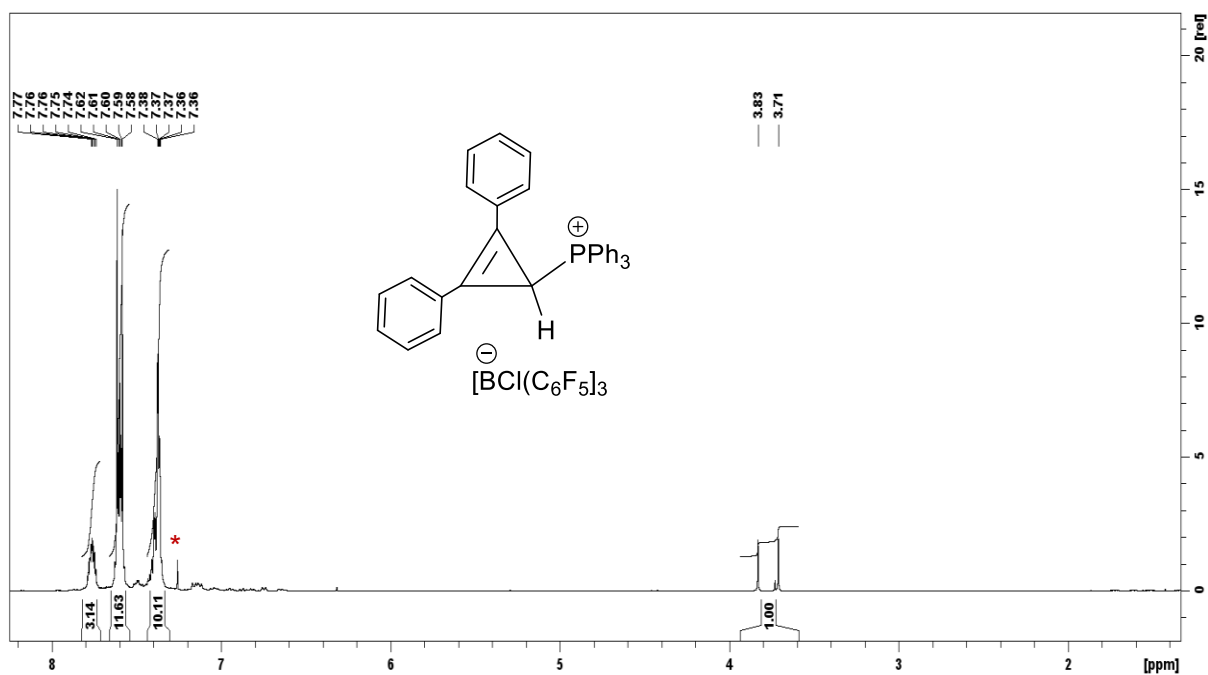

Figure S50.  $^1\text{H}$  NMR (400 MHz) spectrum of the compound **8** in  $\text{CDCl}_3$  (\* =  $\text{CDCl}_3$ ).

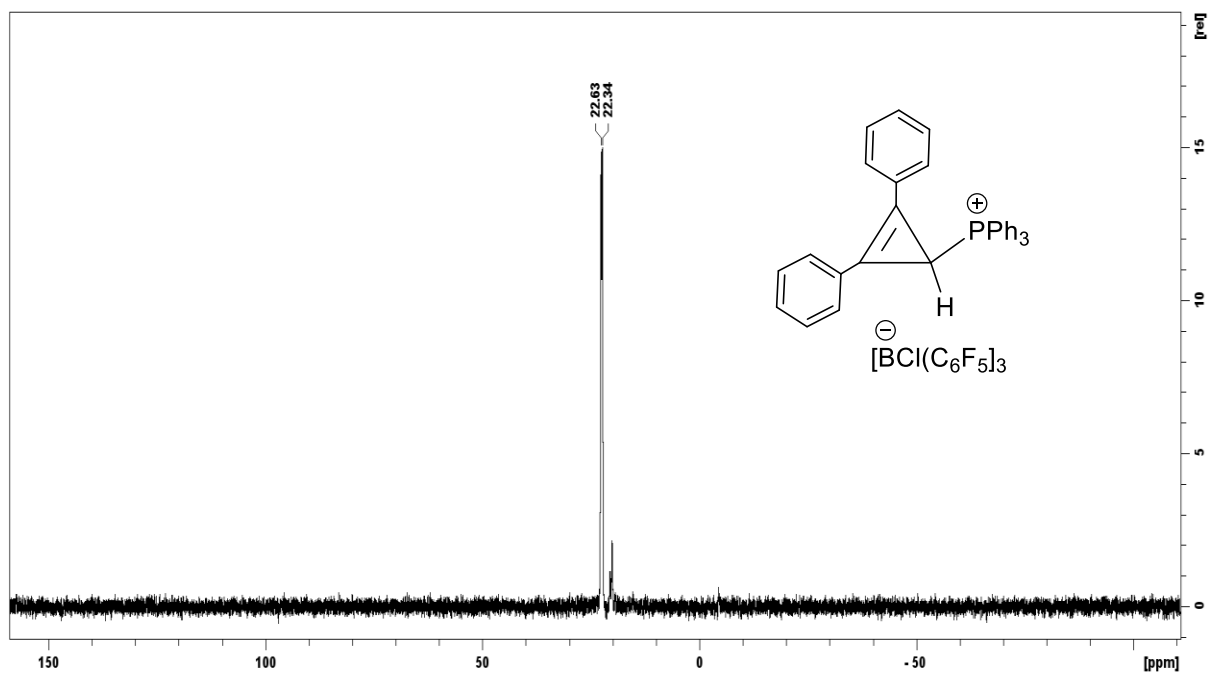

Figure S51.  $^{31}\text{P}$  NMR (162 MHz) spectrum of the compound **8** in  $\text{CDCl}_3$ .

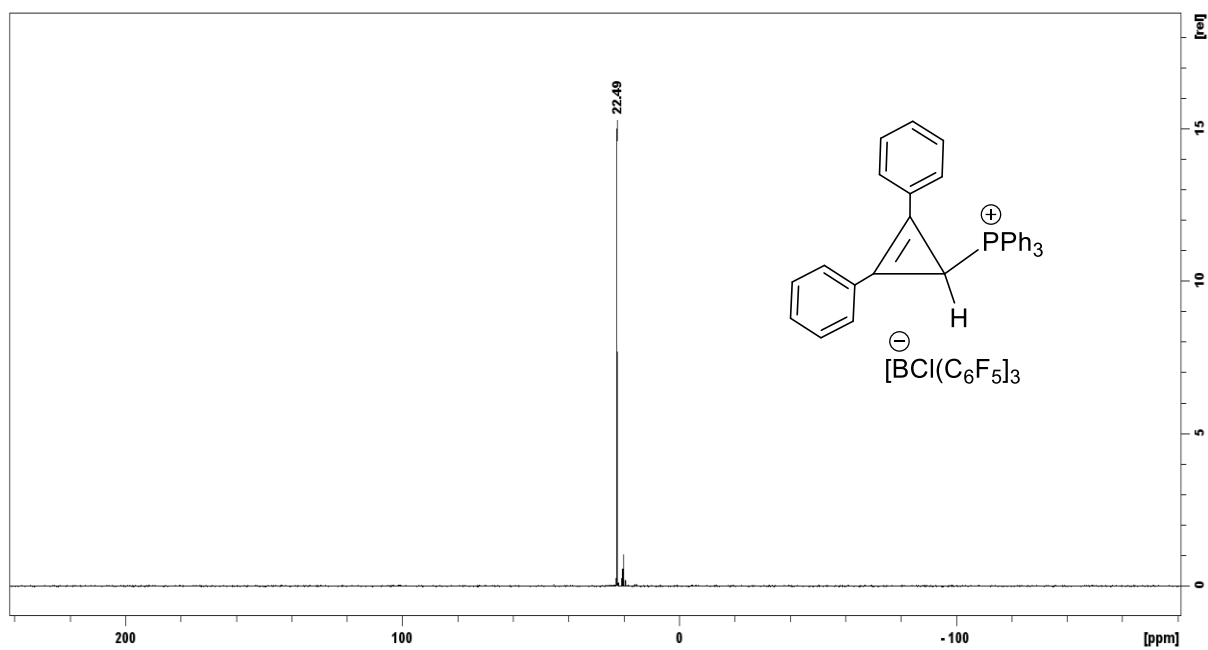

Figure S52.  $^{31}\text{P}\{^1\text{H}\}$  NMR (162 MHz) spectrum of the compound **8** in  $\text{CDCl}_3$ .

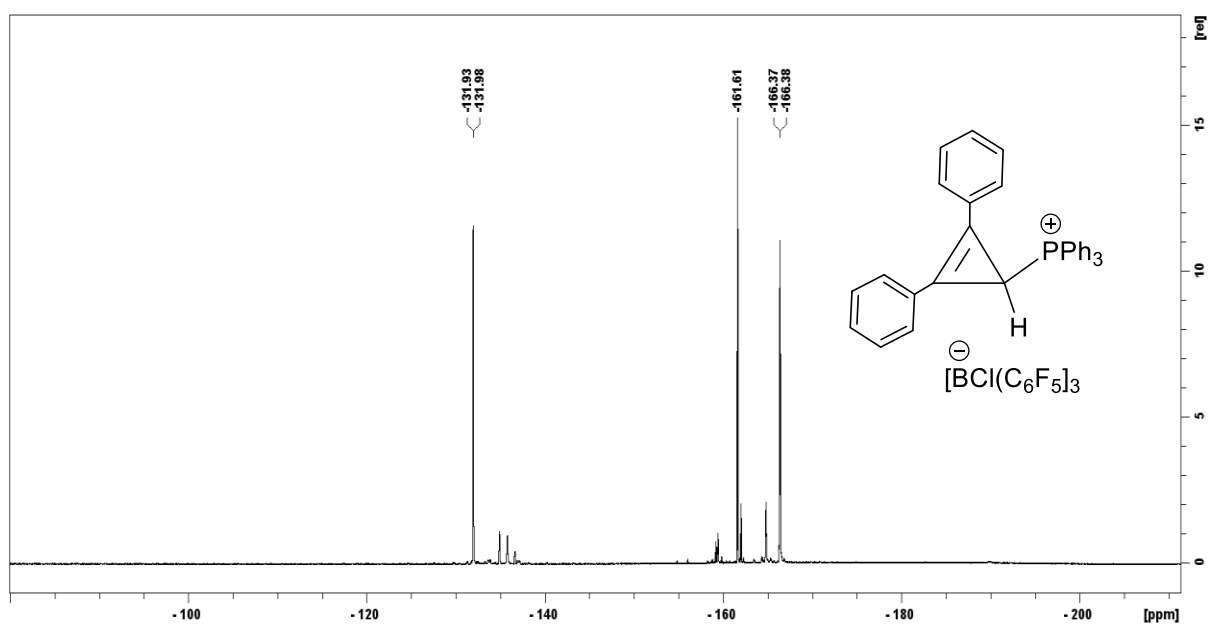

Figure S53.  $^{19}\text{F}$  NMR (377 MHz) spectrum of the compound **8** in  $\text{CDCl}_3$ .

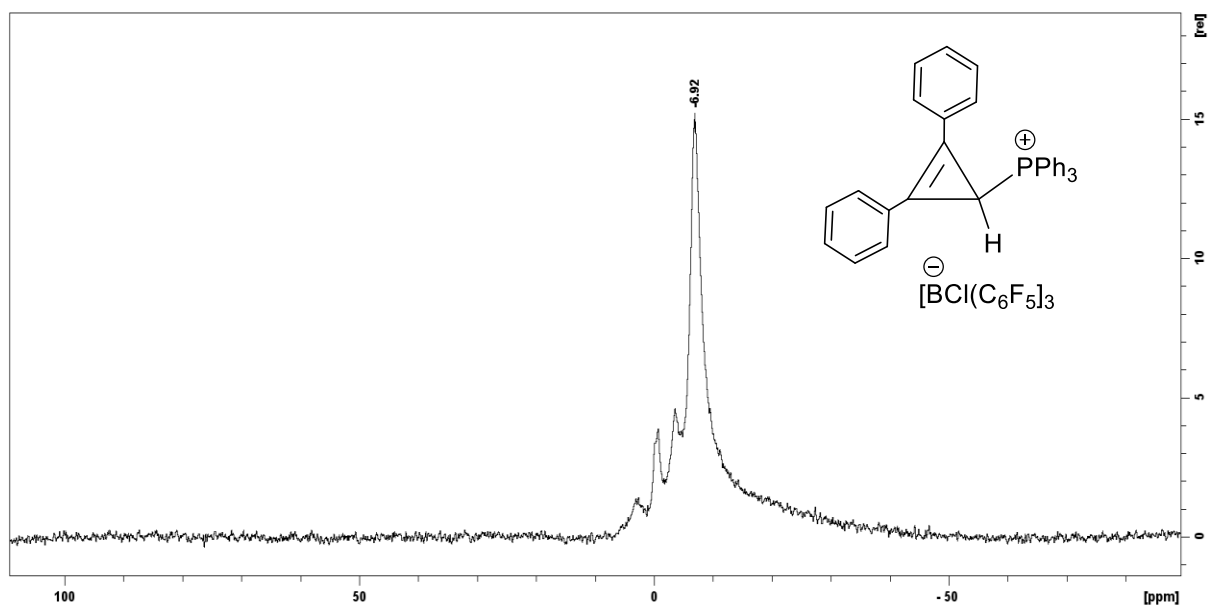

Figure S54.  $^{11}\text{B}$  NMR (128 MHz) spectrum of the compound **8** in  $\text{CDCl}_3$ .

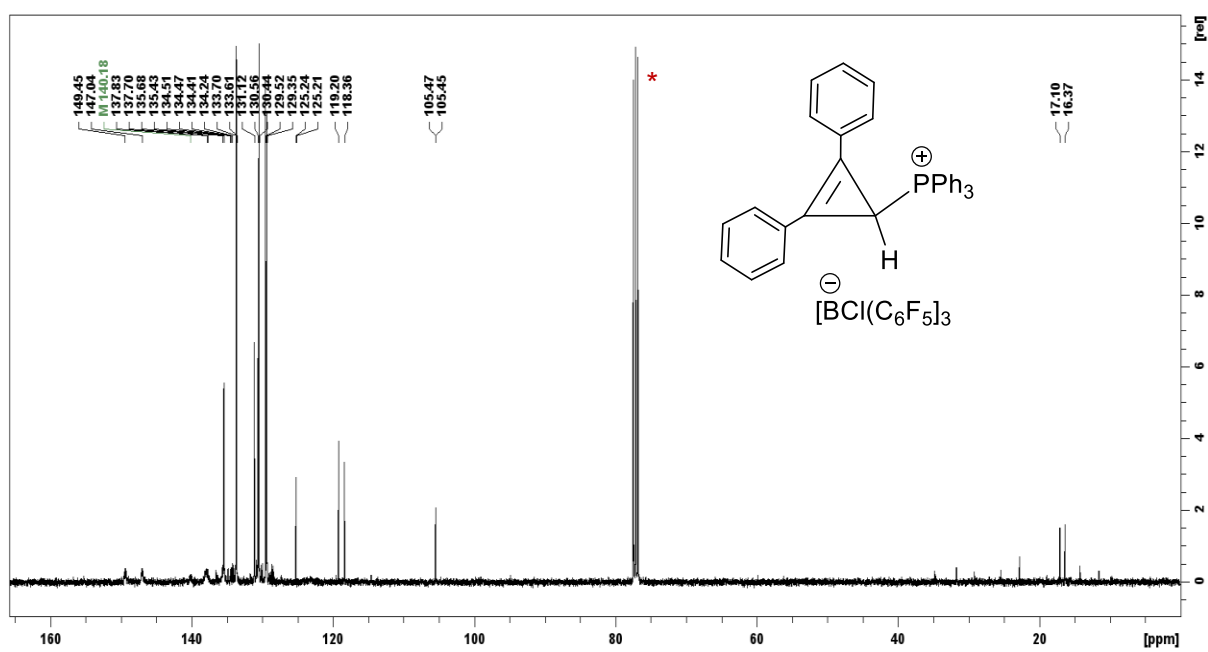

Figure S55.  $^{13}\text{C}$  NMR (101 MHz) spectrum of the compound **8** in  $\text{CDCl}_3$  (\* =  $\text{CDCl}_3$ ).

## Compound 9 and 9'

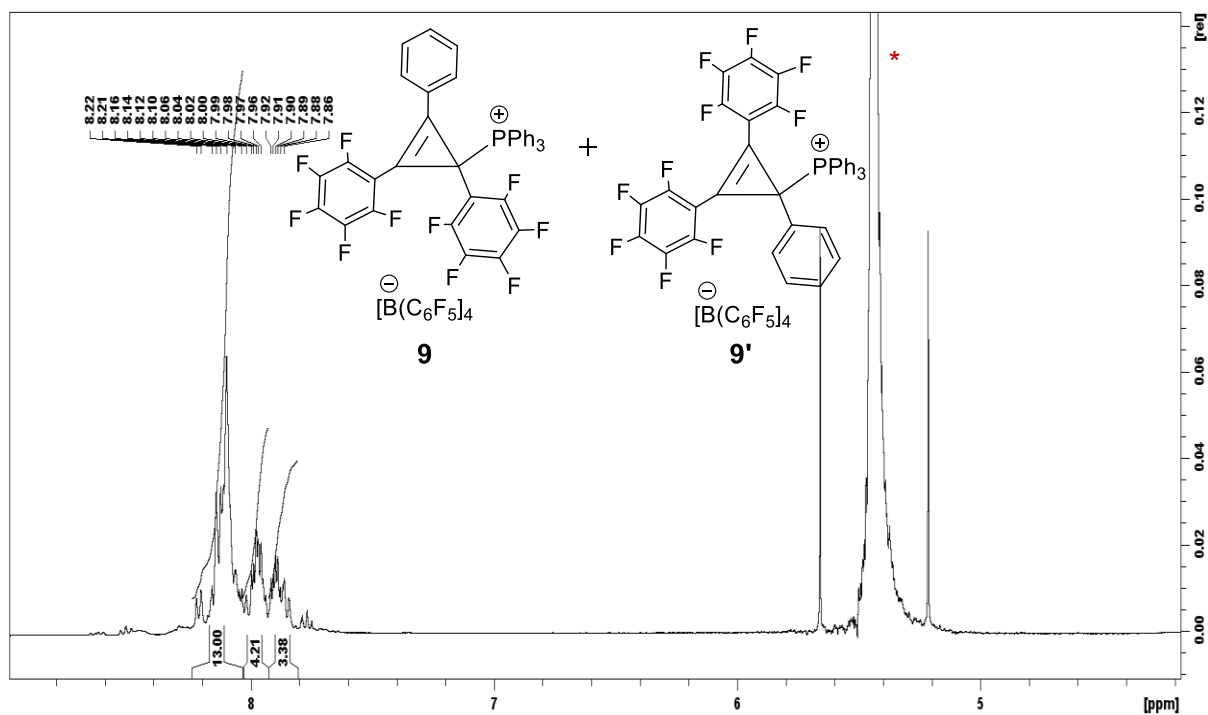

Figure S56.  $^1\text{H}$  NMR (400 MHz) spectrum of the compounds **9** and **9'** in  $\text{CD}_3\text{CN}/\text{DCM}$  (1:2) (\* = DCM).

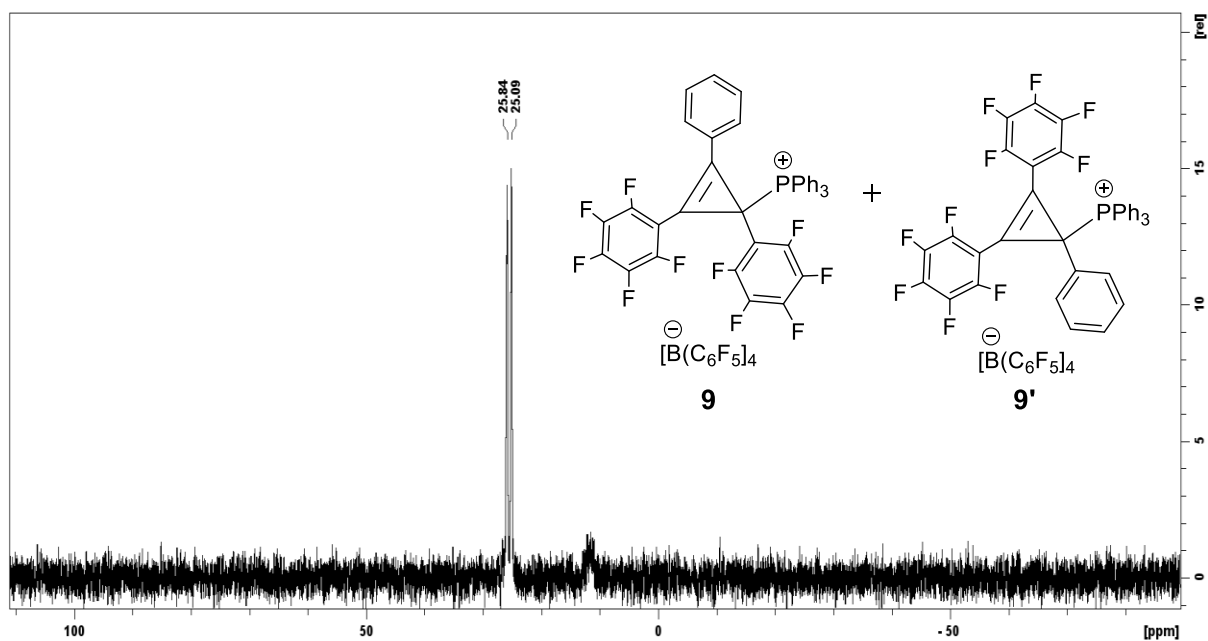

Figure S57.  $^{31}\text{P}$  NMR (162 MHz) spectrum of the compounds **9** and **9'** in  $\text{CD}_3\text{CN}/\text{DCM}$  (1:2).

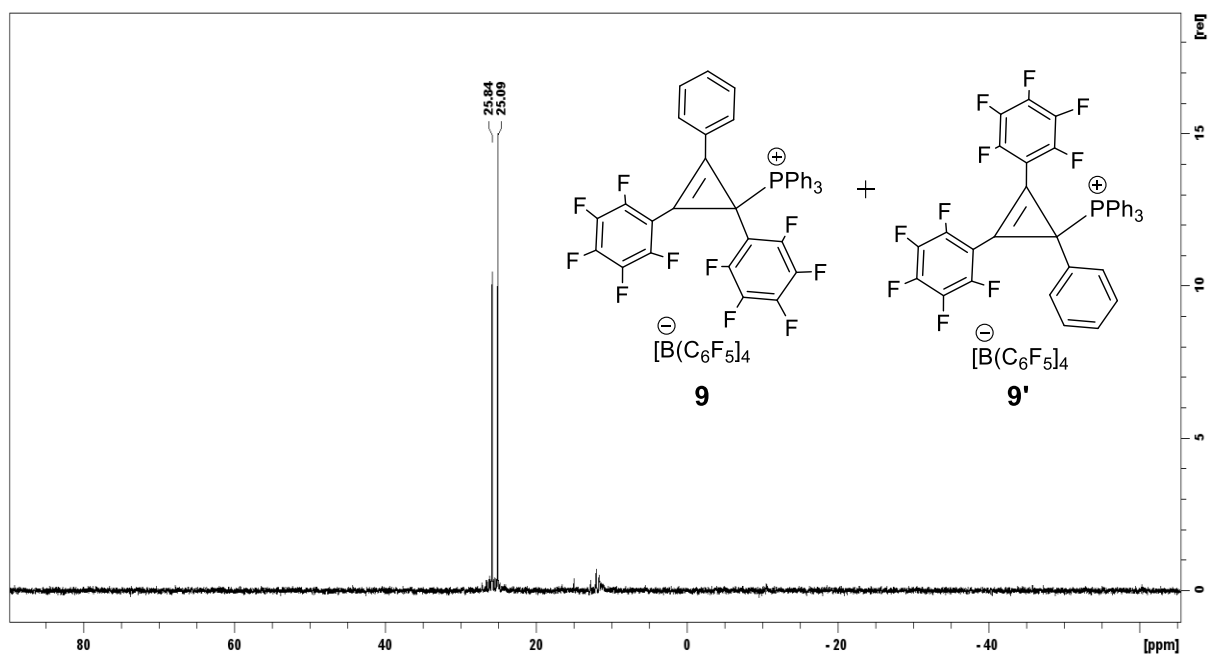

Figure S58.  $^{31}\text{P}\{^1\text{H}\}$  NMR (162 MHz) spectrum of the compounds **9** and **9'** in  $\text{CD}_3\text{CN}/\text{DCM}$  (1:2).

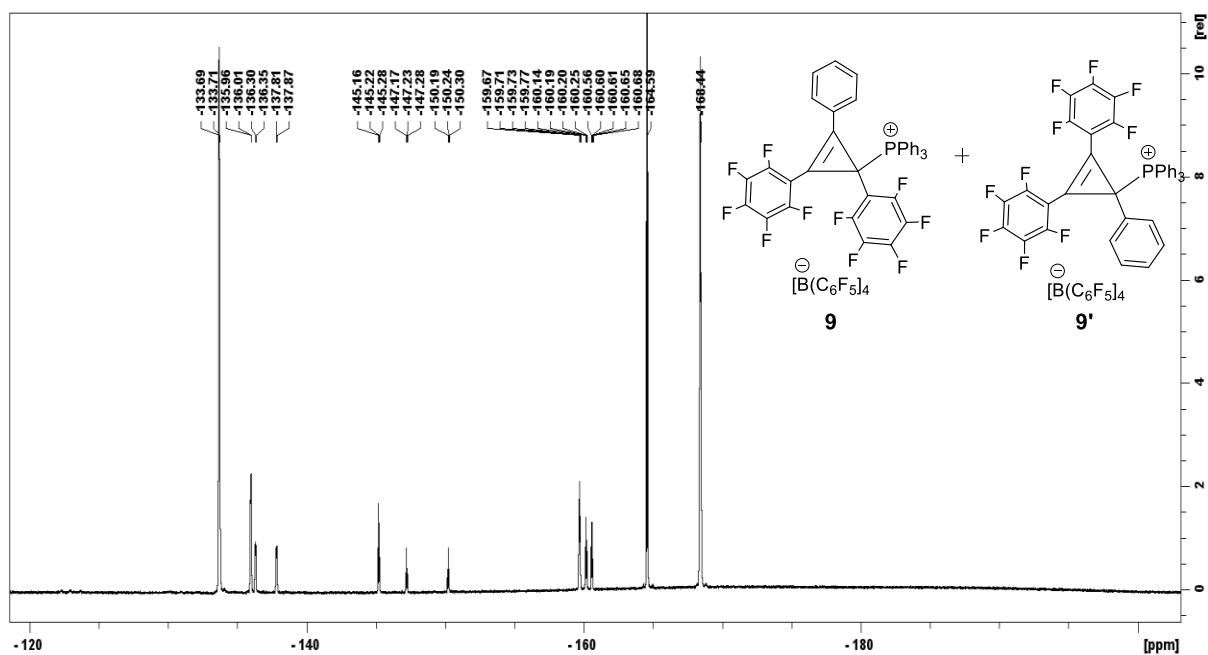

Figure S59.  $^{19}\text{F}$  NMR (377 MHz) spectrum of the compounds **9** and **9'** in  $\text{CD}_3\text{CN}/\text{DCM}$  (1:2).

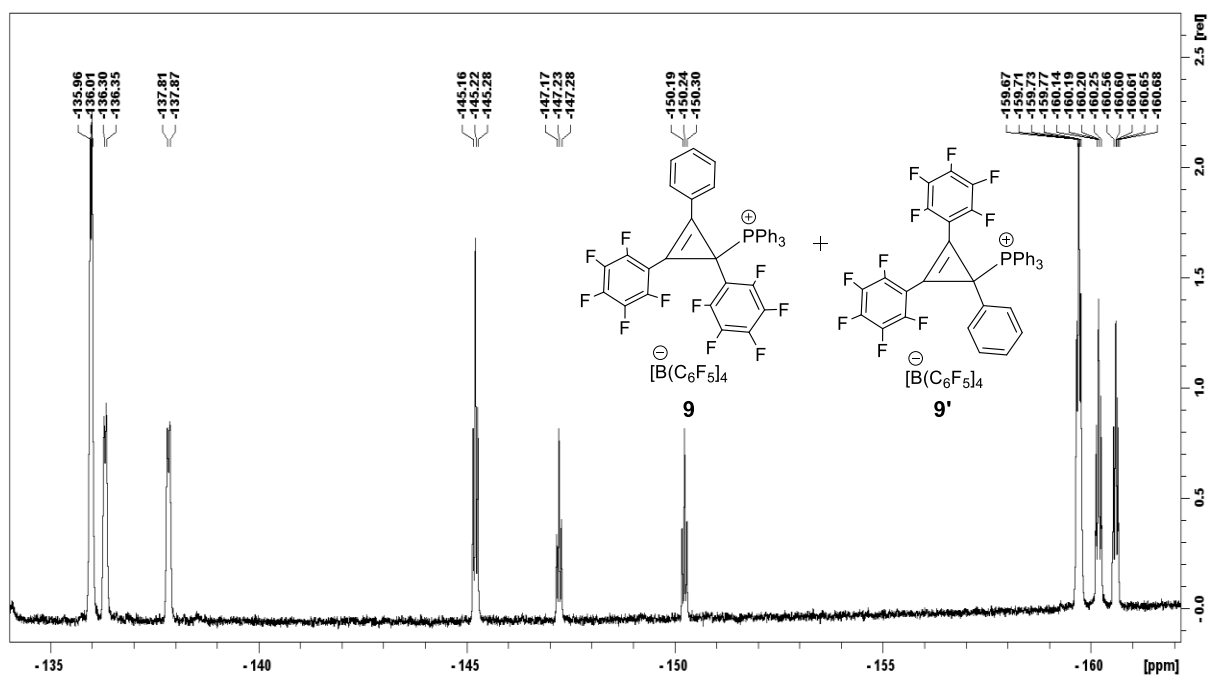

Figure S60.  $^{19}\text{F}$  NMR (377 MHz) EXPANSION spectrum (-134 to -162 ppm) of the compounds **9** and **9'**.

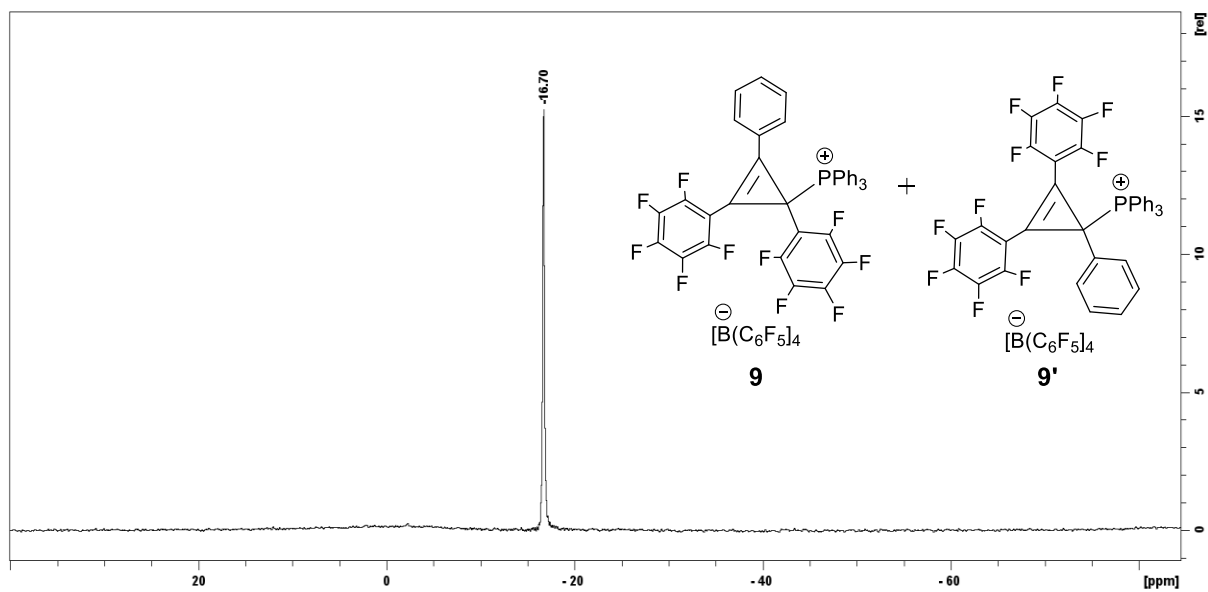

Figure S61.  $^{11}\text{B}$  NMR (128 MHz) spectrum of the compounds **9** and **9'** in  $\text{CD}_3\text{CN}/\text{DCM}$  (1:2).

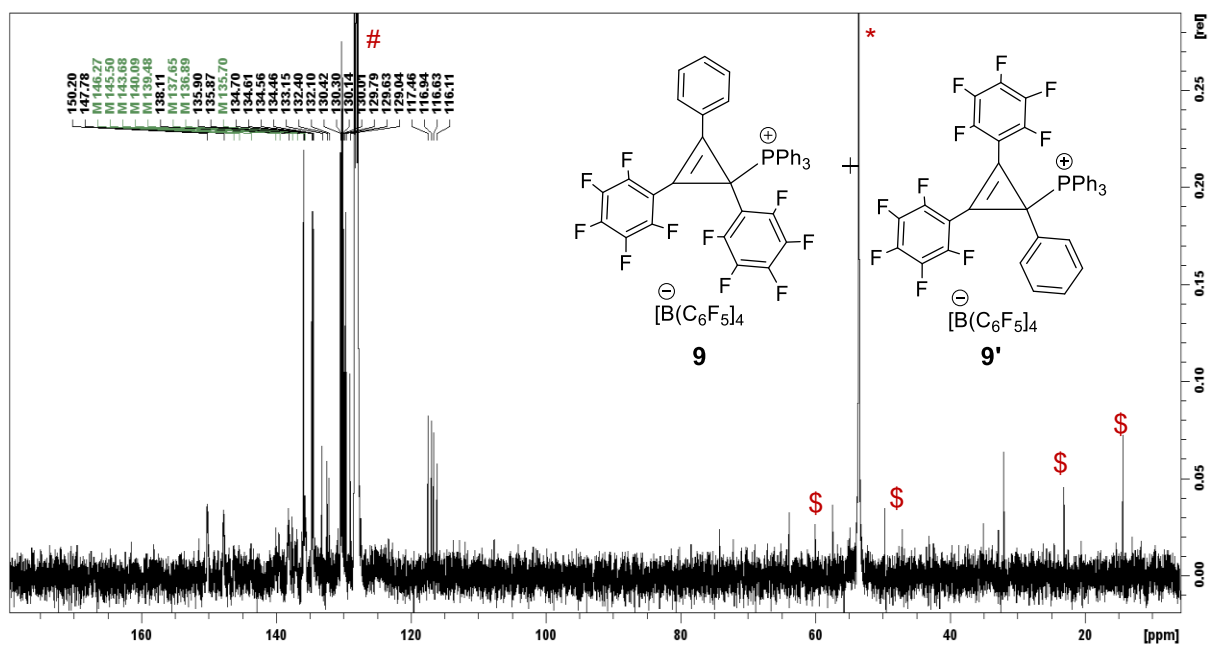

Figure S62.  $^{13}\text{C}$  NMR (101 MHz) spectrum of the compounds **9** and **9'** in  $\text{CD}_3\text{CN}/\text{DCM}$  (1:2) (\*= DCM, #= $\text{CD}_3\text{CN}$ , \$=unidentified impurities).

## Compound 10

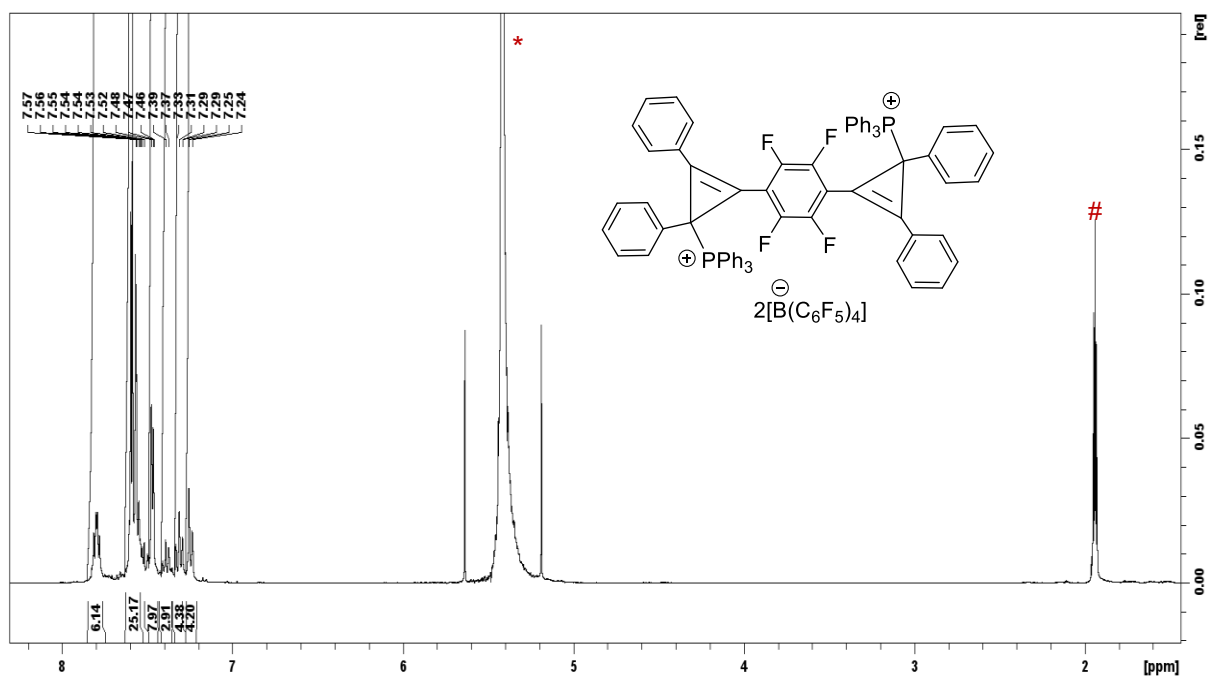

Figure S63.  $^1\text{H}$  NMR (400 MHz) spectrum of the compound **10** in  $\text{CD}_3\text{CN}/\text{DCM}$  (1:2) (\* = DCM, # =  $\text{CD}_3\text{CN}$ ).

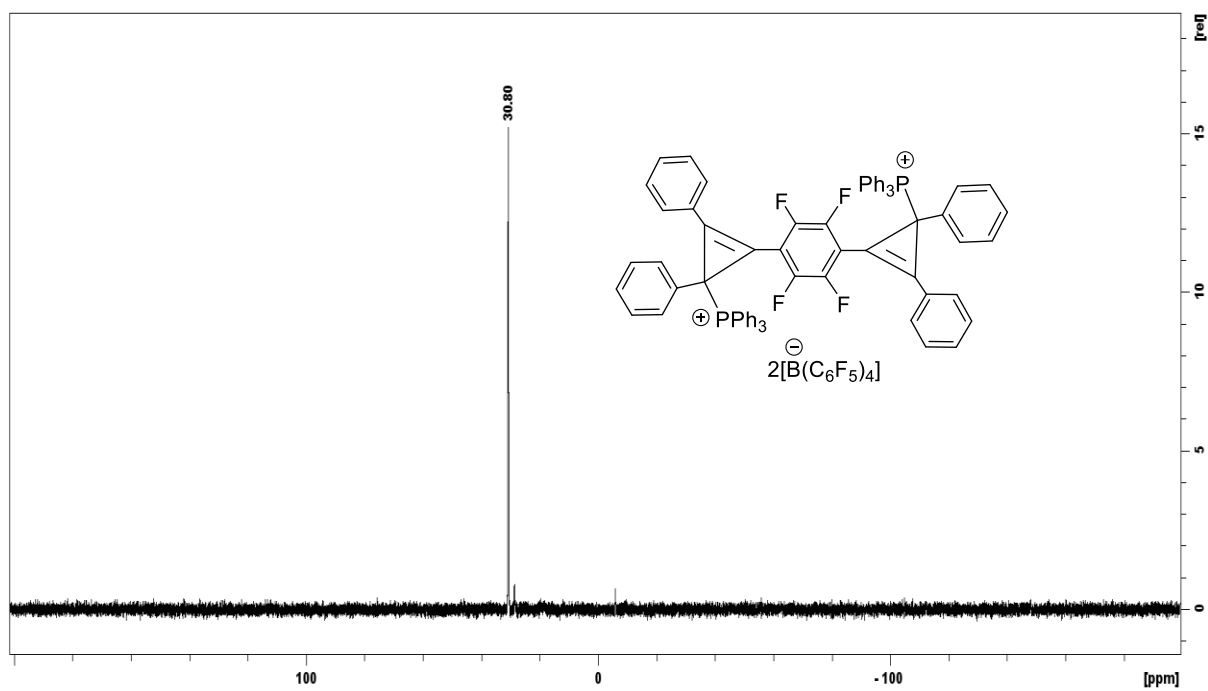

Figure S64.  $^{31}\text{P}$  NMR (162 MHz) spectrum of the compound **10** in  $\text{CD}_3\text{CN}/\text{DCM}$  (1:2).



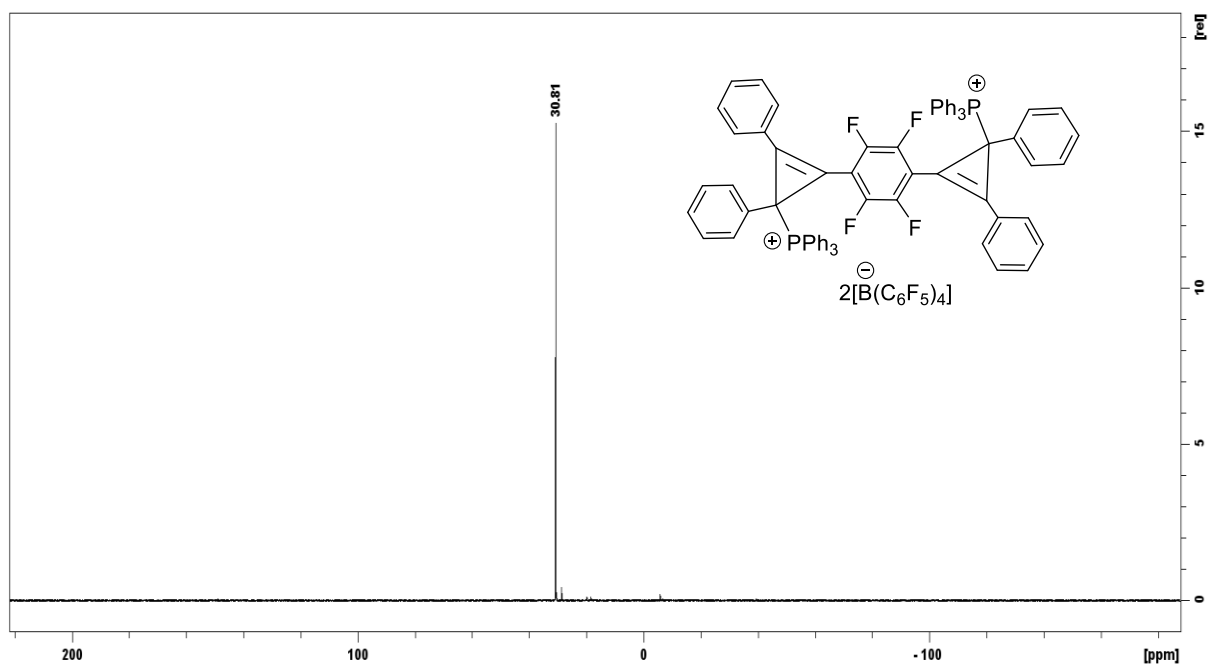

Figure S65.  $^{31}\text{P}\{^1\text{H}\}$  NMR (162 MHz) spectrum of the compound **10** in  $\text{CD}_3\text{CN}/\text{DCM}$  (1:2).

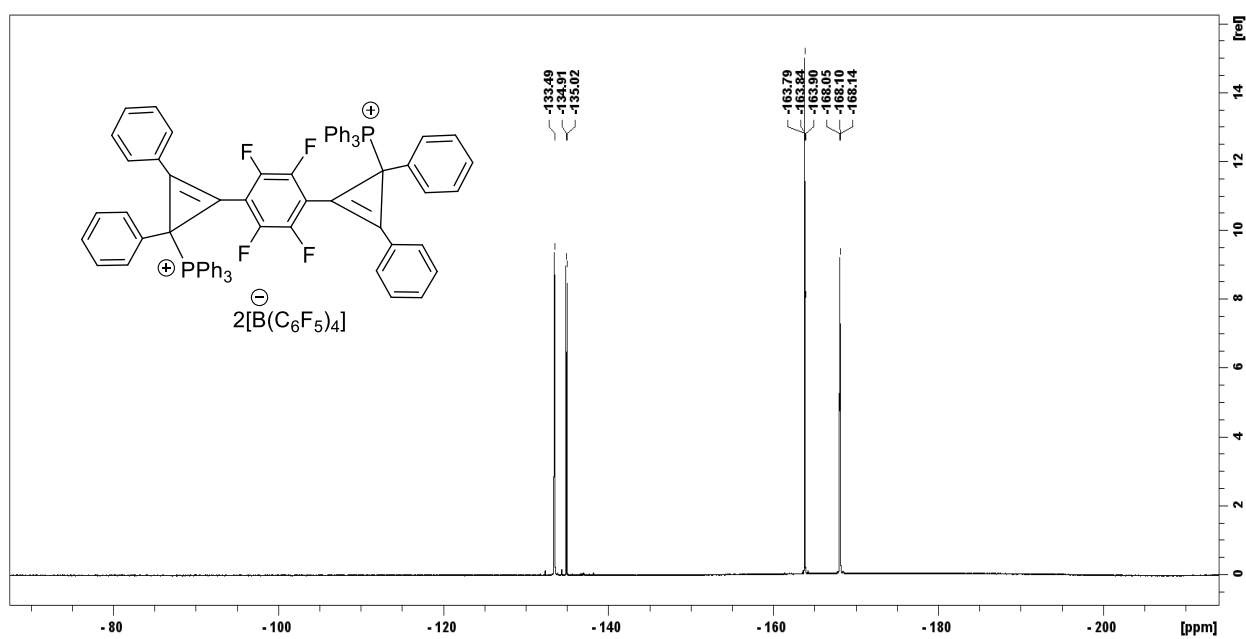

Figure S66.  $^{19}\text{F}$  NMR (377 MHz) spectrum of the compound **10** in  $\text{CD}_3\text{CN}/\text{DCM}$  (1:2).

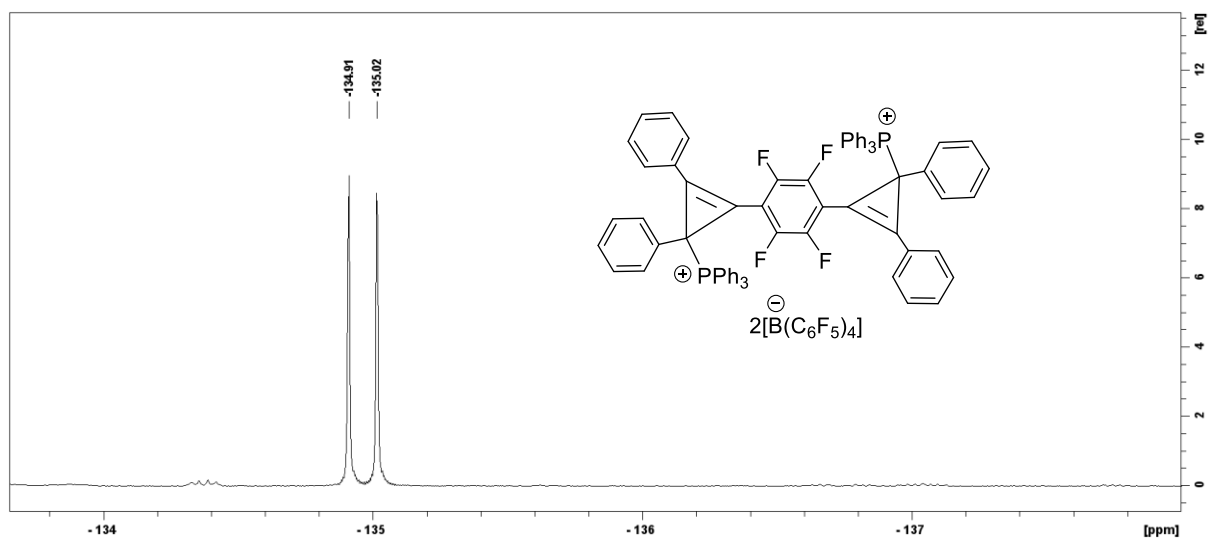

Figure S67.  $^{19}\text{F}$  NMR (377 MHz) EXPANSION spectrum (-133 to -137 ppm) of the compound **10**.

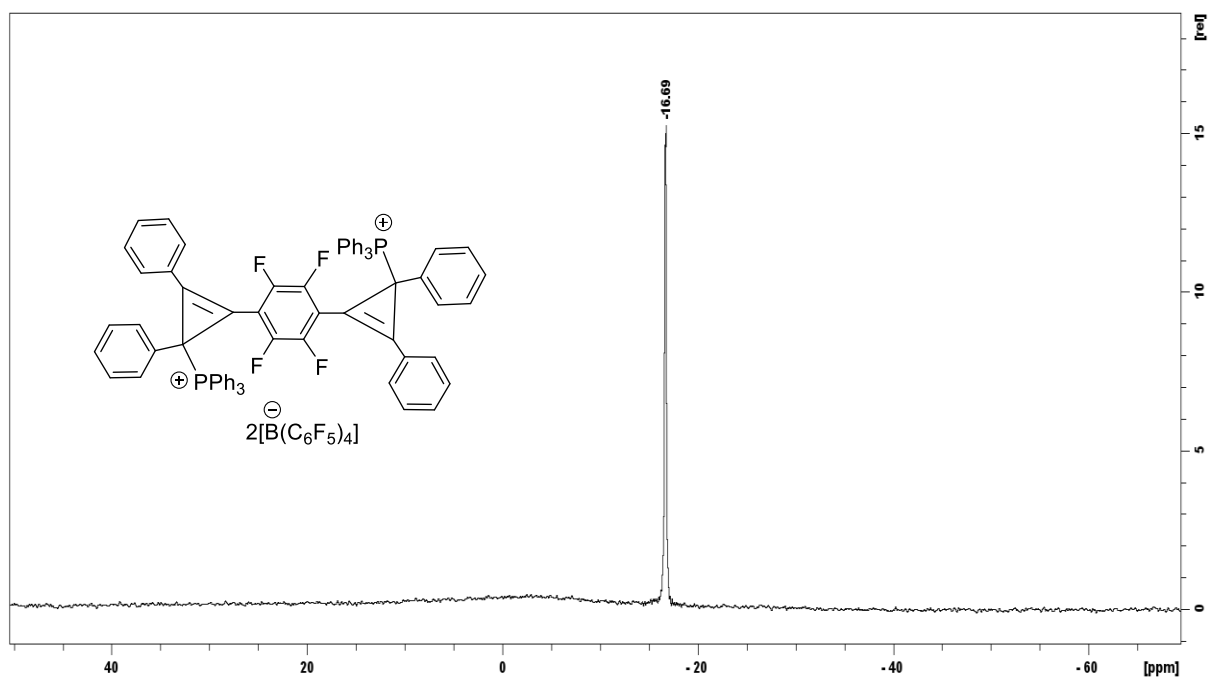

Figure S68.  $^{11}\text{B}$  NMR (128 MHz) spectrum of the compound **10** in  $\text{CD}_3\text{CN}/\text{DCM}$  (1:2).

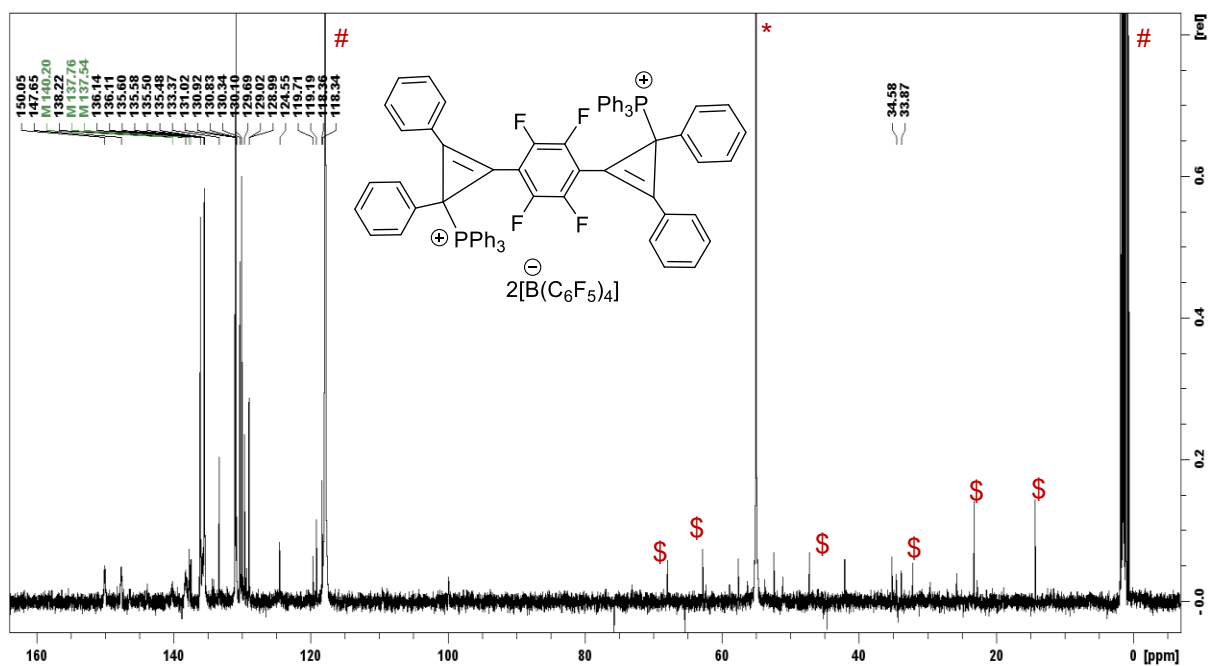

Figure S69.  $^{13}\text{C}$  NMR (101 MHz) spectrum of the compound **10** in  $\text{CD}_3\text{CN}/\text{DCM}$  (1:2) (\*=DCM, #= $\text{CD}_3\text{CN}$ , \$=unidentified impurities).

## Compound 11

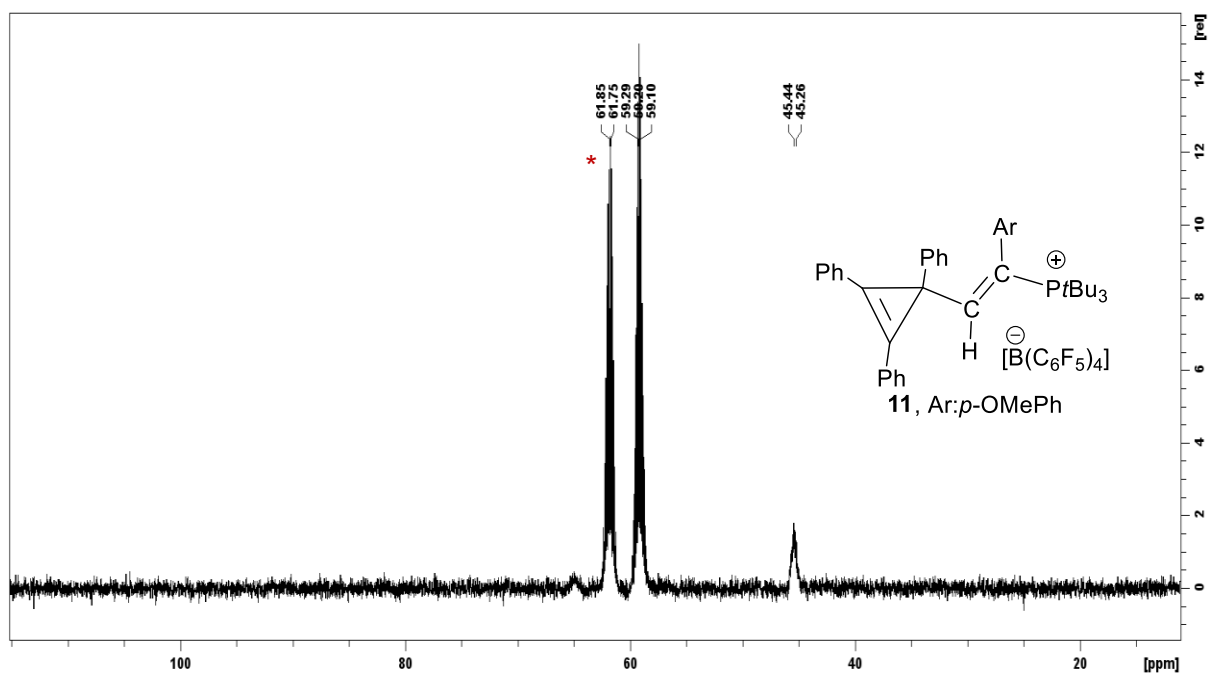

Figure S70.  $^{31}\text{P}$  NMR (162 MHz) spectrum of the compound **11** in DCM (\*= $[\text{tBu}_3\text{PH}][\text{B}(\text{C}_6\text{F}_5)_4]$ ).

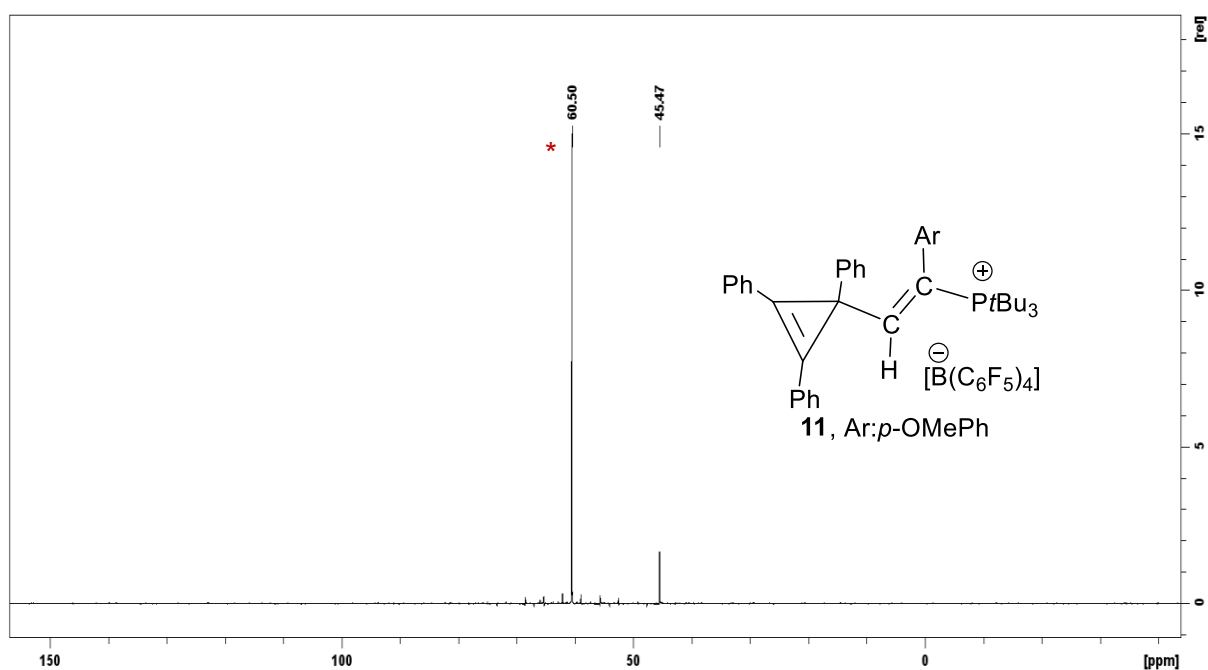

Figure S71.  $^{31}\text{P}\{^1\text{H}\}$  NMR (162 MHz) spectrum of the compound **11** in DCM (\*= $[\text{tBu}_3\text{PH}][\text{B}(\text{C}_6\text{F}_5)_4]$ ).

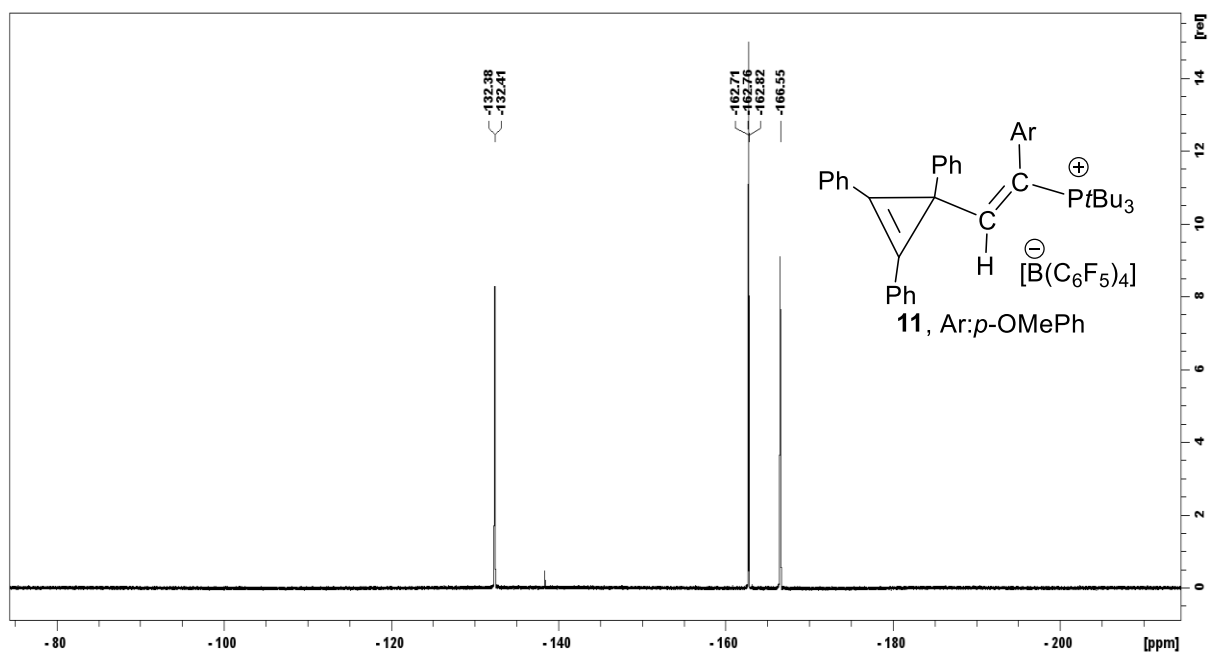

Figure S72.  $^{19}\text{F}$  NMR (377 MHz) spectrum of the compound **11** in DCM.

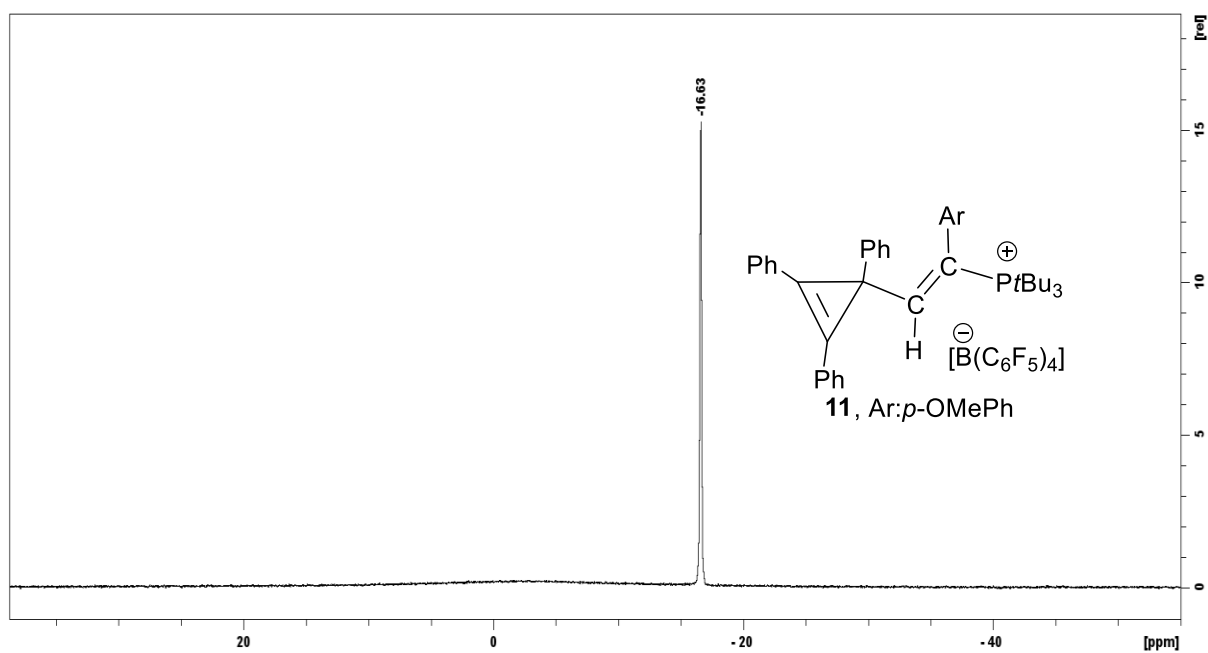

Figure S73.  $^{11}\text{B}$  NMR (128 MHz) spectrum of the compound **11** in DCM.

## Compound 12

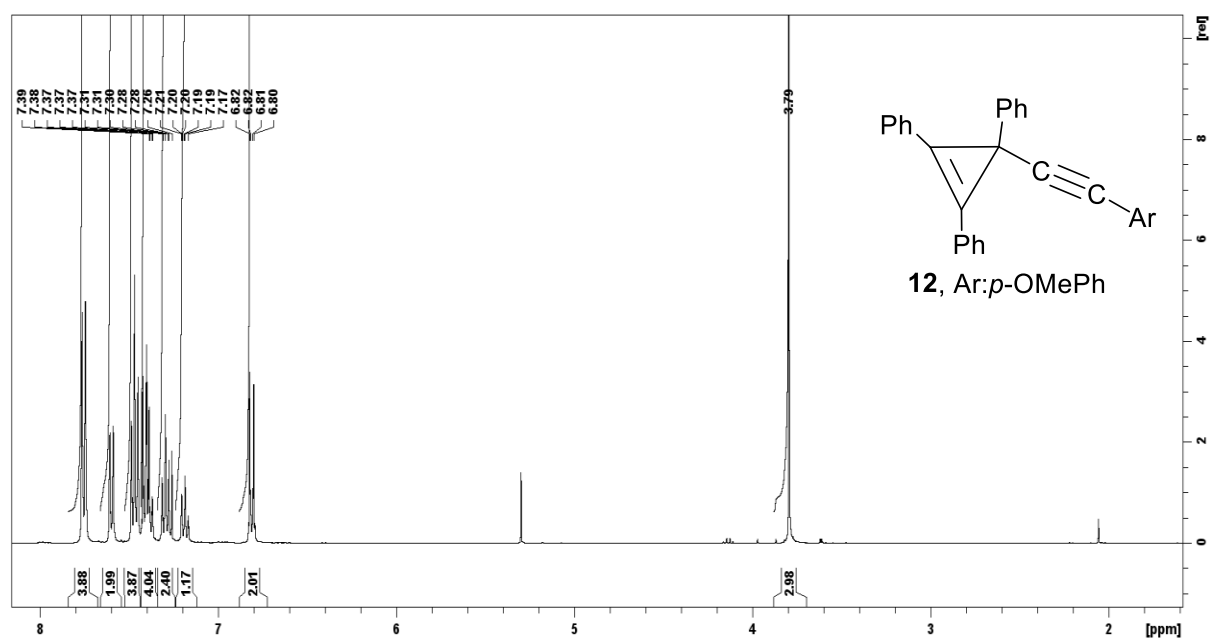

Figure S74.  $^1\text{H NMR}$  (400 MHz) spectrum of the compound **12** in  $\text{CDCl}_3$  (\* =  $\text{CDCl}_3$ ).

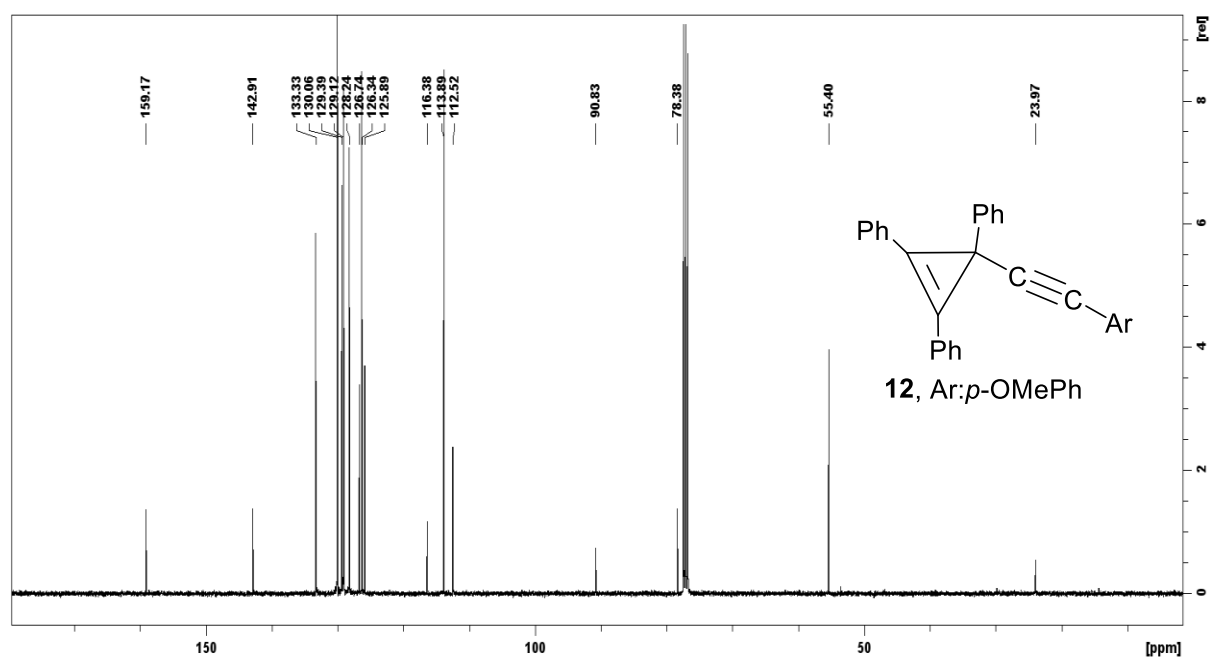

Figure S75.  $^{13}\text{C NMR}$  (101 MHz) spectrum of the compound **12** in  $\text{CDCl}_3$  (\* =  $\text{CDCl}_3$ ).

### Compound 13

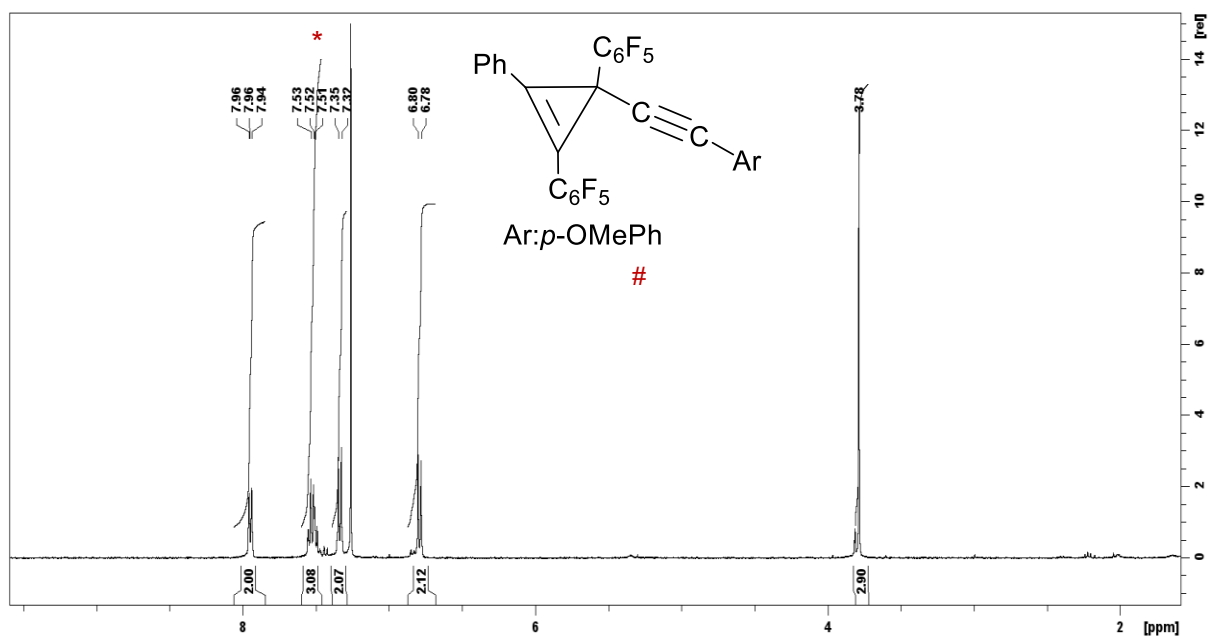

Figure S76.  $^1\text{H}$  NMR (400 MHz) spectrum of the compound **13** in  $\text{CDCl}_3$  (\*=  $\text{CDCl}_3$ , #= $\text{DCM}$ ).

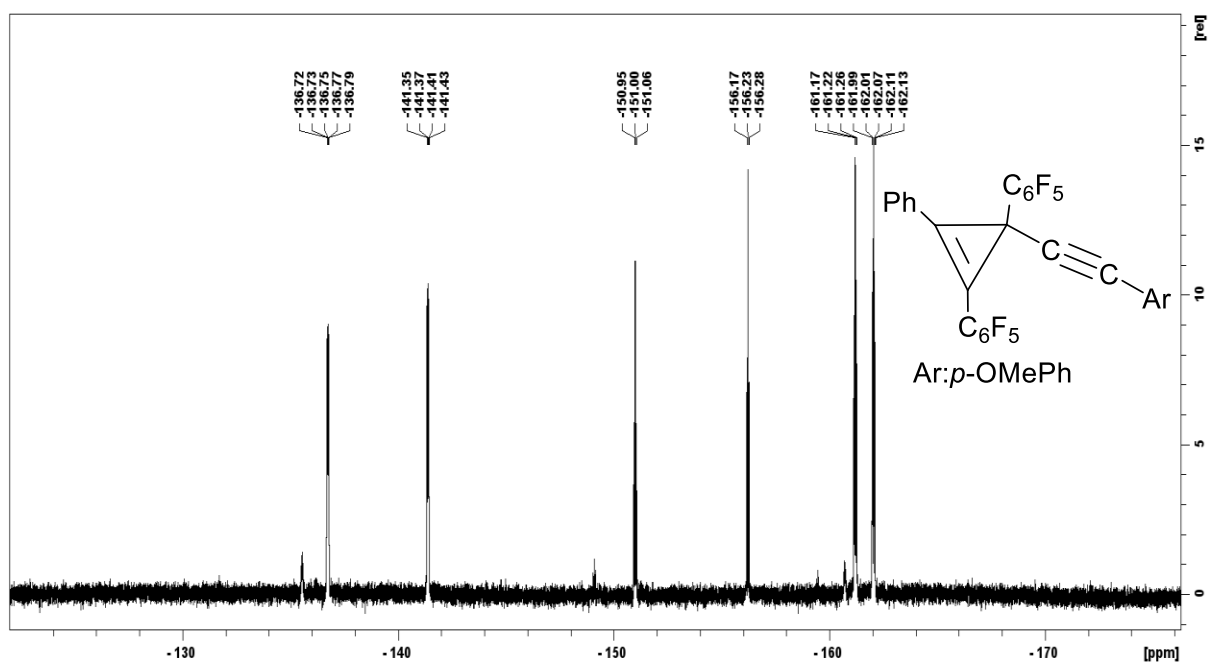

Figure S77.  $^{19}\text{F}$  NMR (377 MHz) spectrum of the compound **13** in  $\text{CDCl}_3$  (\*=  $\text{CDCl}_3$ ).

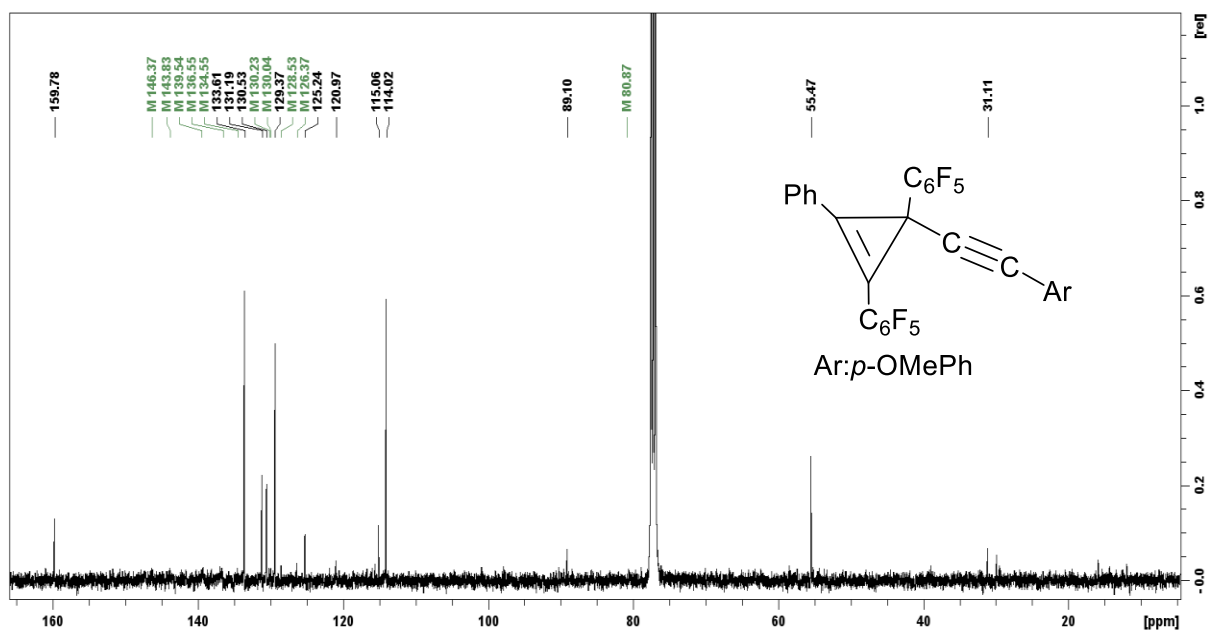

Figure S78.  $^{13}\text{C}$  NMR (101 MHz) spectrum of the compound **13** in  $\text{CDCl}_3$  (\* =  $\text{CDCl}_3$ ).



# Compound 14

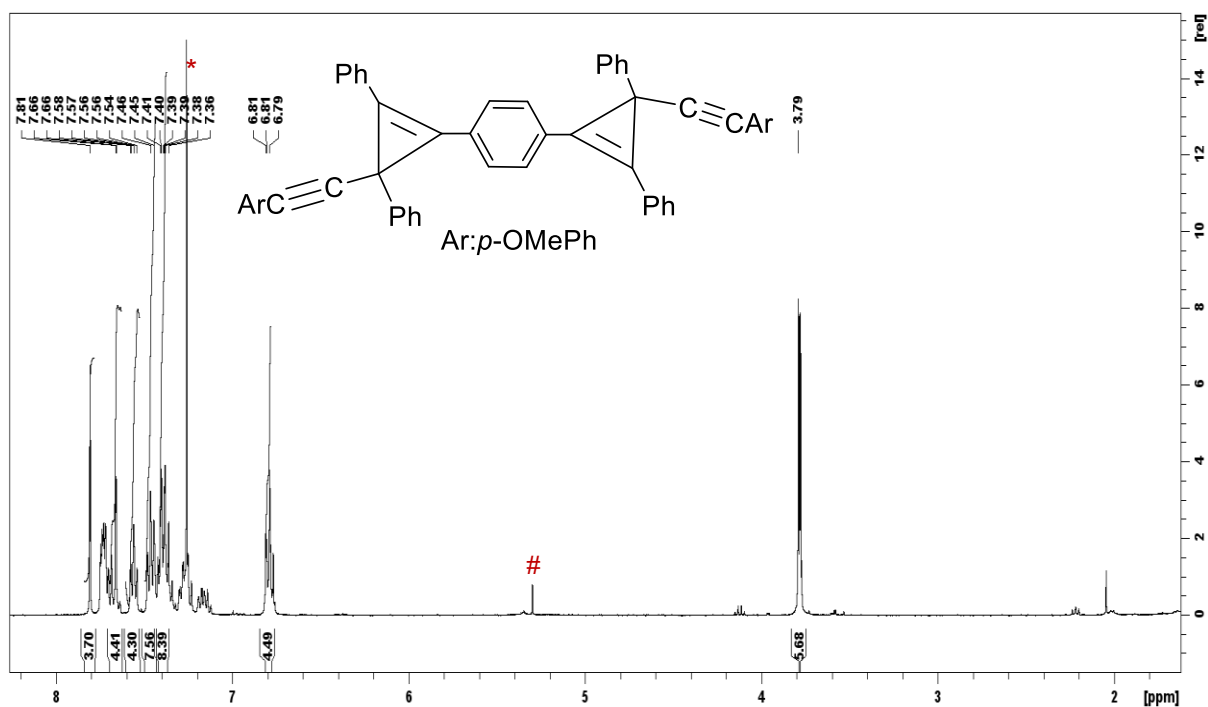

Figure S79.  $^1\text{H NMR}$  (400 MHz) spectrum of the compound **14** in  $\text{CDCl}_3$  (\* =  $\text{CDCl}_3$ , # = DCM).

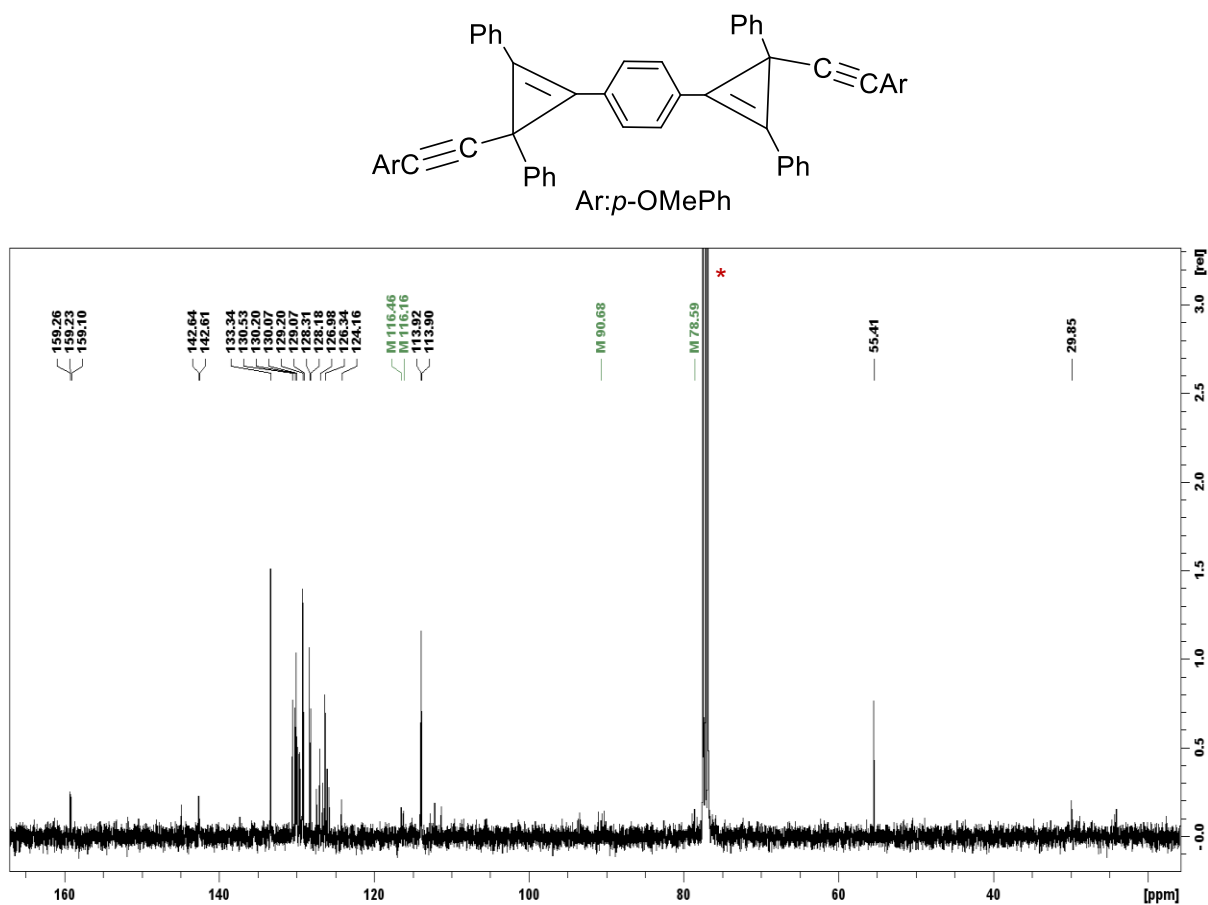

Figure S80.  $^{13}\text{C}$  NMR (101 MHz) spectrum of the compound **14** in  $\text{CDCl}_3$  (\* =  $\text{CDCl}_3$ ).

## Compound 15

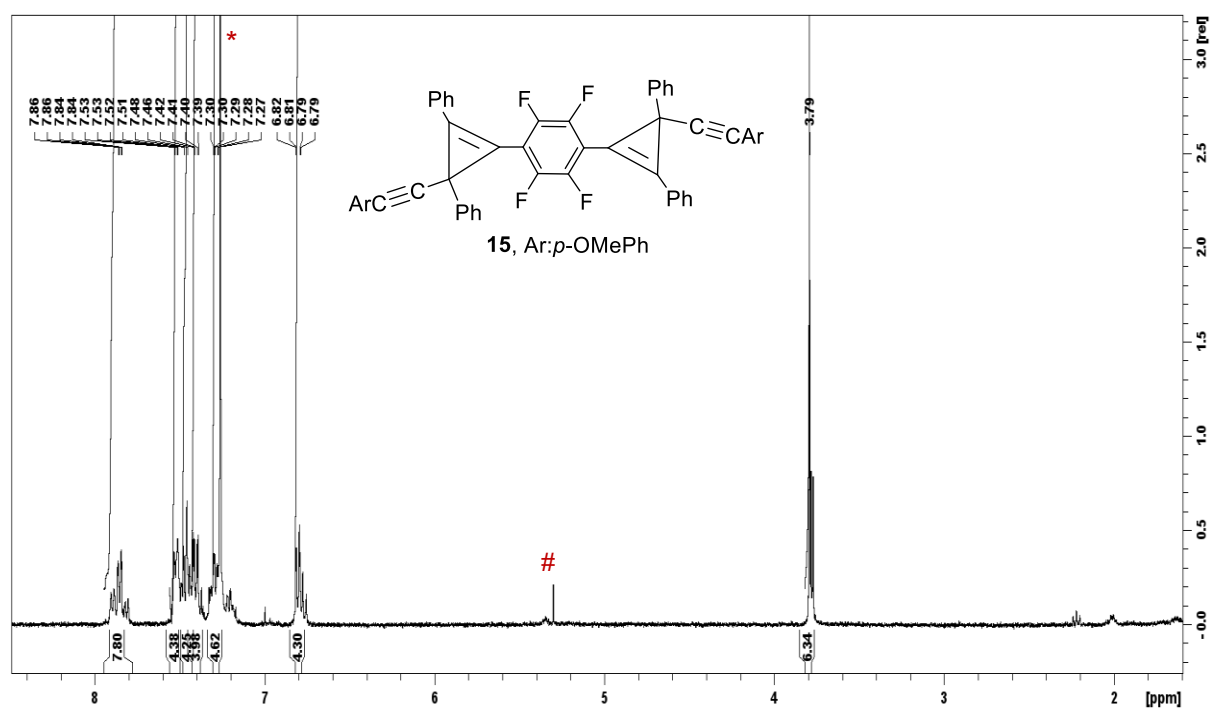

Figure S81.  $^1\text{H}$  NMR (400 MHz) spectrum of the compound **15** in  $\text{CDCl}_3$  (\*=  $\text{CDCl}_3$ , #= $\text{DCM}$ ).

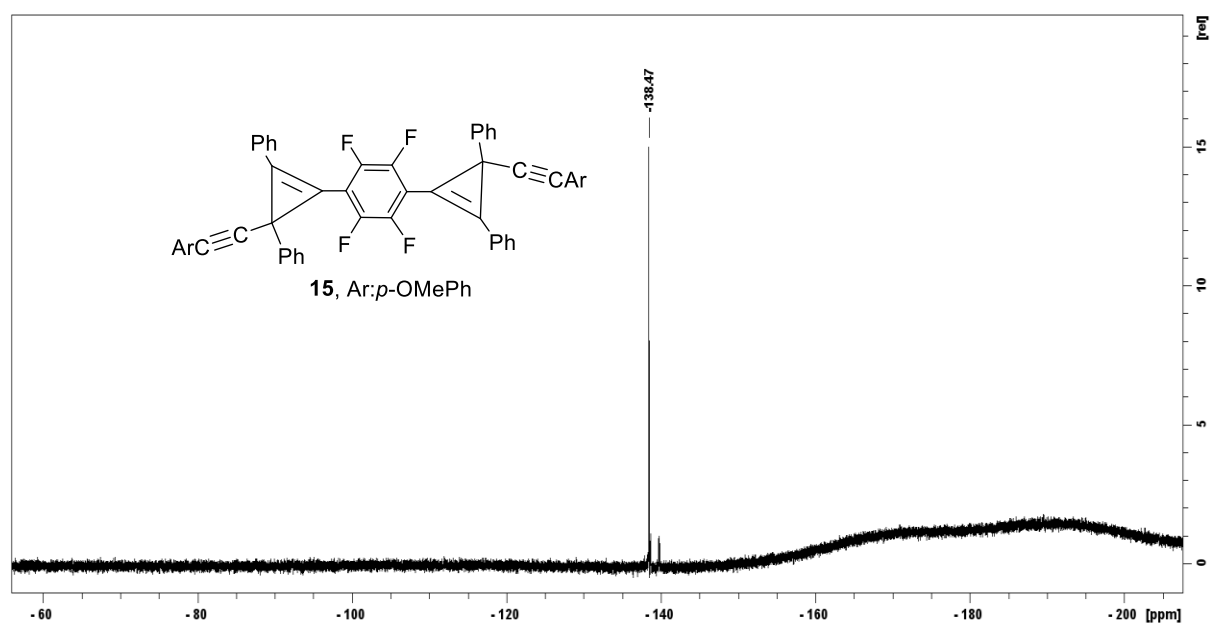

Figure S82.  $^{19}\text{F}$  NMR (377 MHz) spectrum of the compound **15** in  $\text{CDCl}_3$  (\*=  $\text{CDCl}_3$ ).

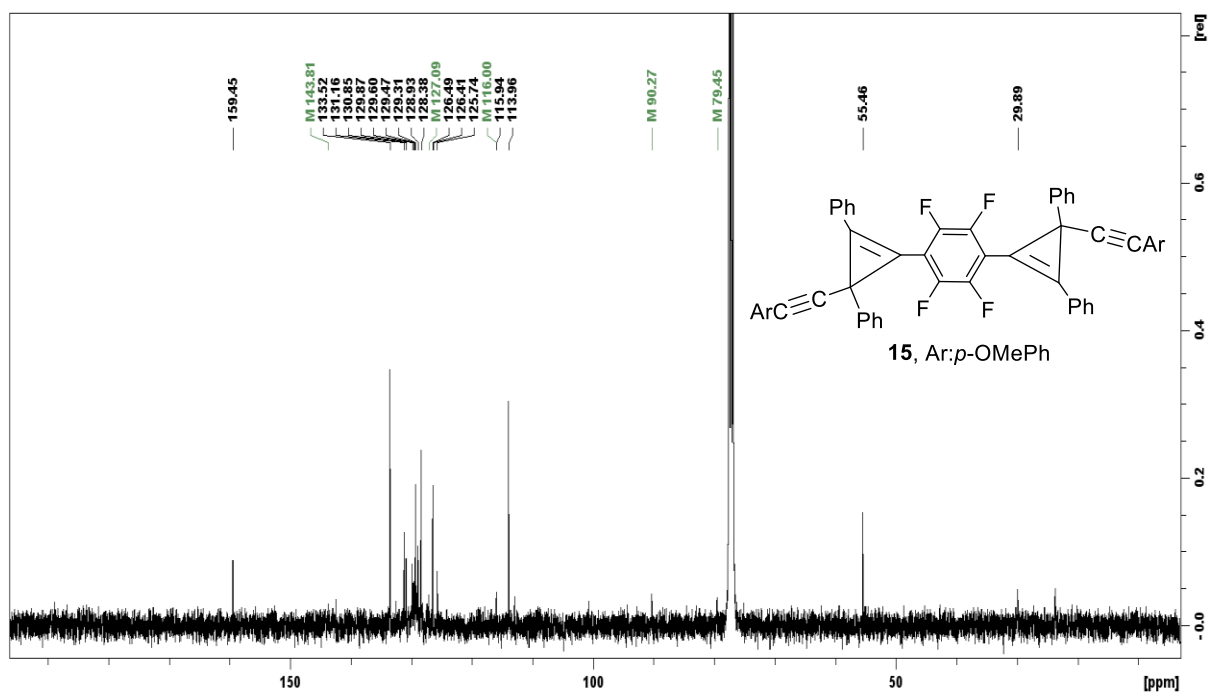

Figure S83.  $^{13}\text{C}$  NMR (101 MHz) spectrum of the compound **15** in  $\text{CDCl}_3$  (\* =  $\text{CDCl}_3$ ).

## Compound 16

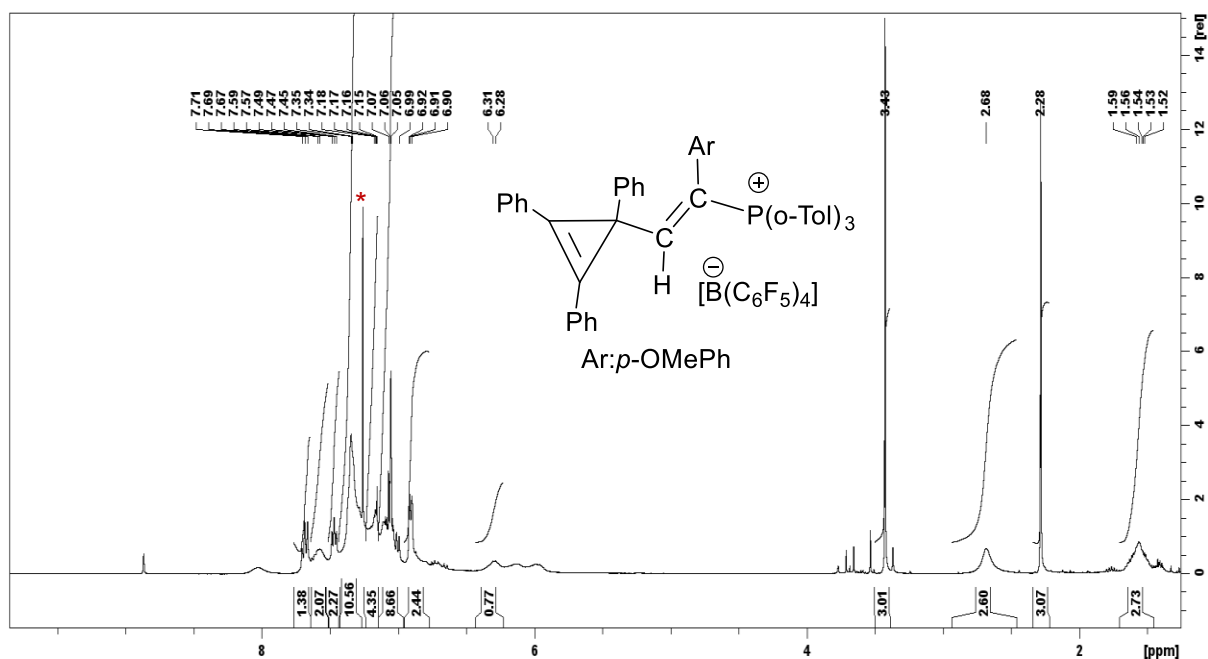

Figure S84.  $^1\text{H NMR}$  (400 MHz) spectrum of the compound **16** in  $\text{CDCl}_3$  (\* =  $\text{CDCl}_3$ ).

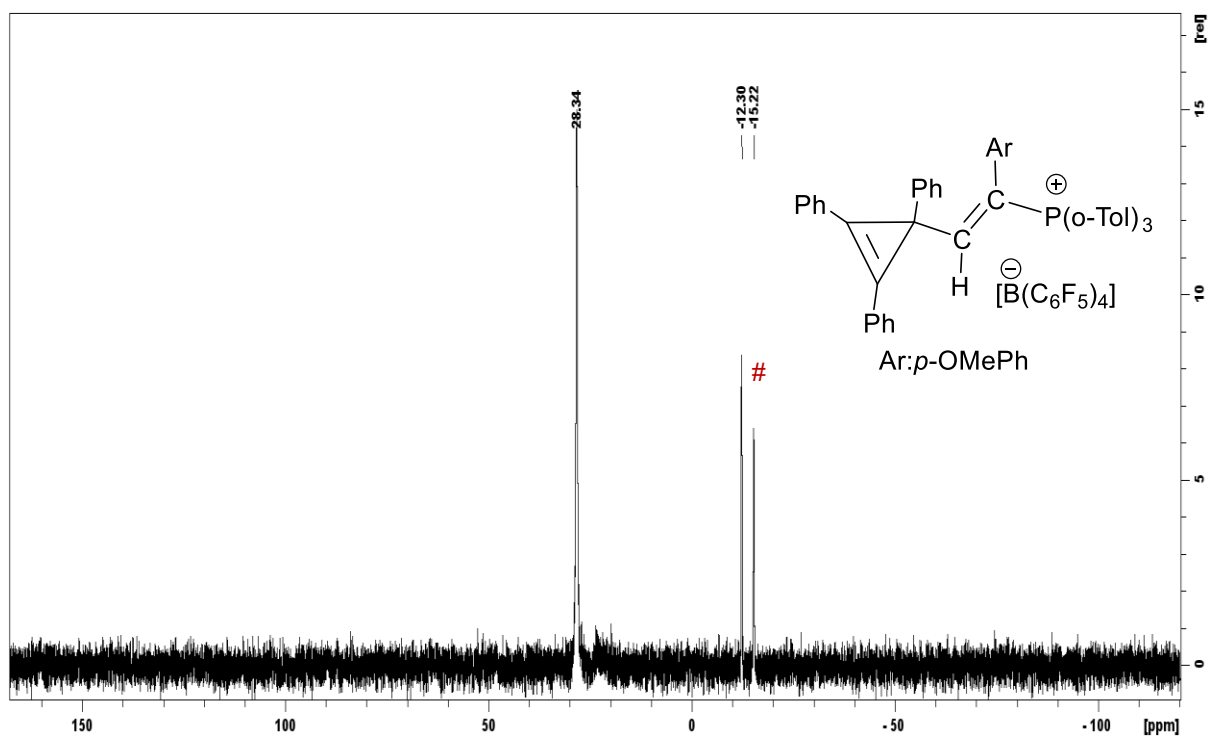

Figure S85.  $^{31}\text{P NMR}$  (126 MHz) spectrum of the compound **16** in  $\text{CDCl}_3$  (# =  $[\text{HP}(o\text{-Tol})_3][\text{B}(\text{C}_6\text{F}_5)_4]$ ).

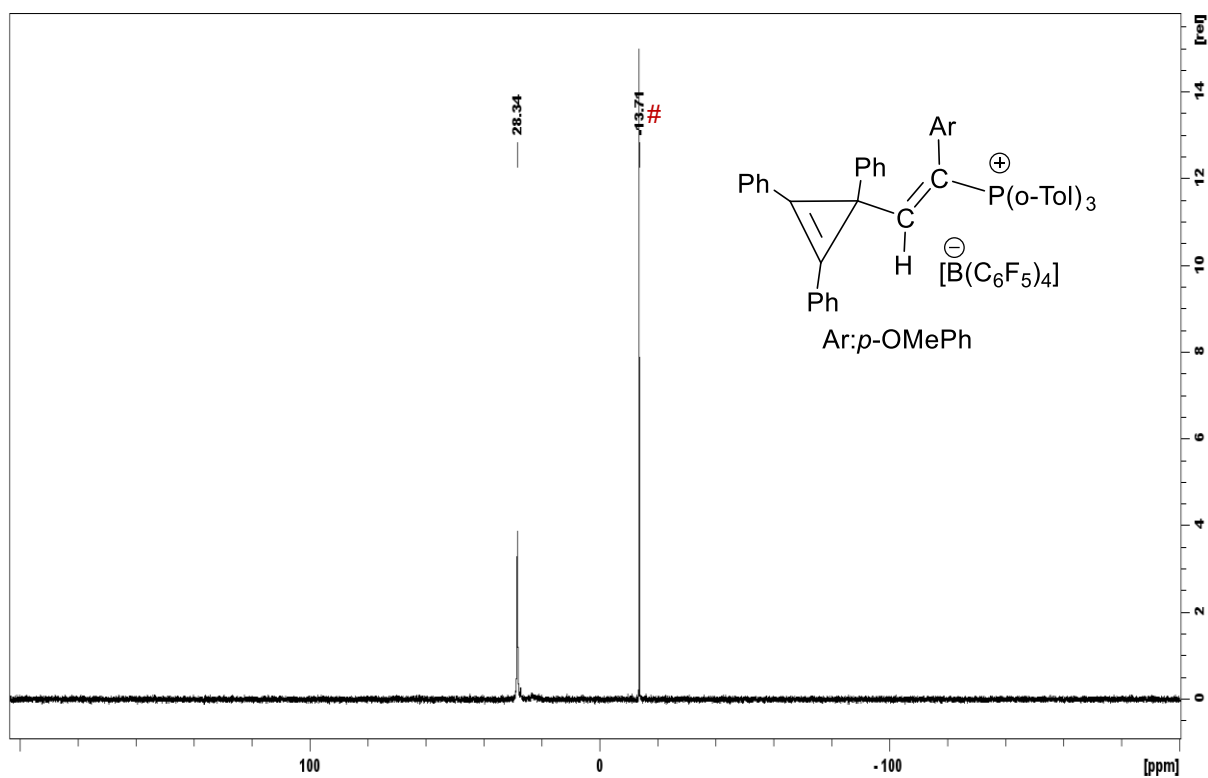

Figure S86.  $^{31}\text{P}\{^1\text{H}\}$  NMR (126 MHz) spectrum of the compound **16** in  $\text{CDCl}_3$  (#= $[\text{HP}(\text{o-Tol})_3][\text{B}(\text{C}_6\text{F}_5)_4]$ ).

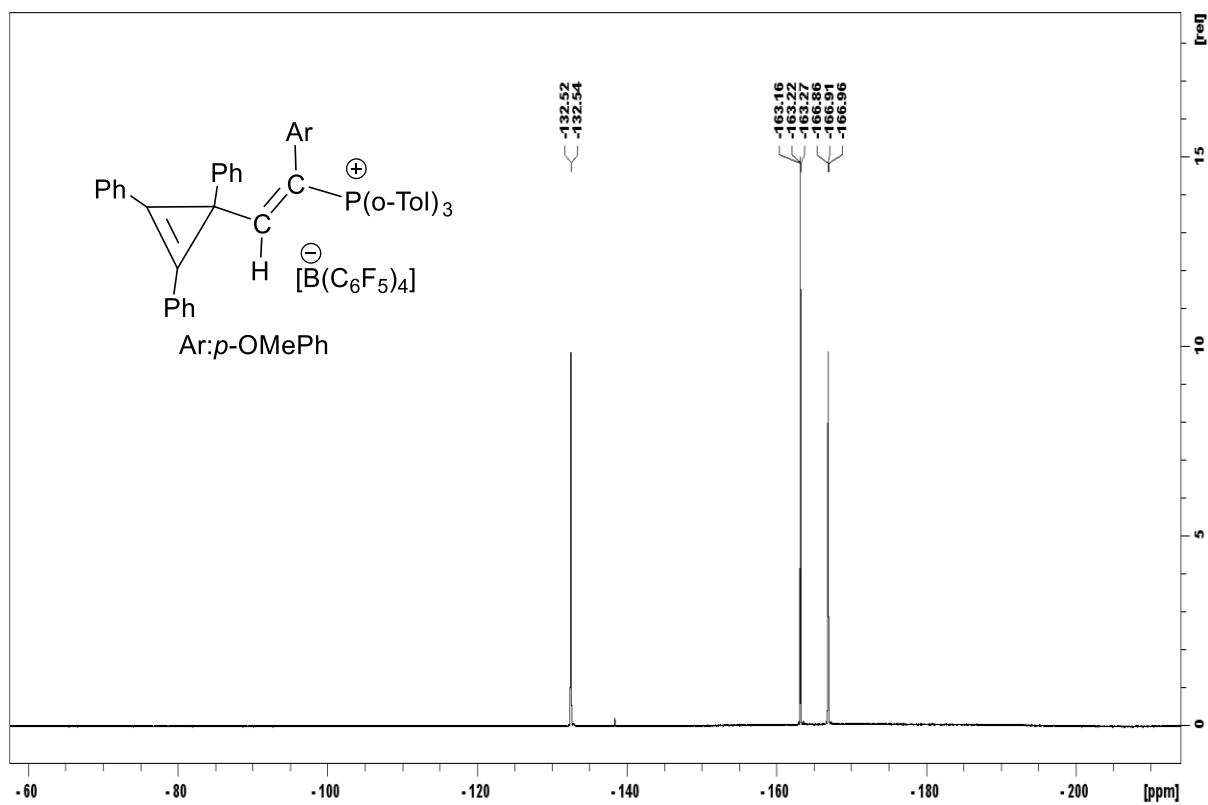

Figure S87.  $^{19}\text{F}$  NMR (377 MHz) spectrum of the compound **16** in  $\text{CDCl}_3$ .

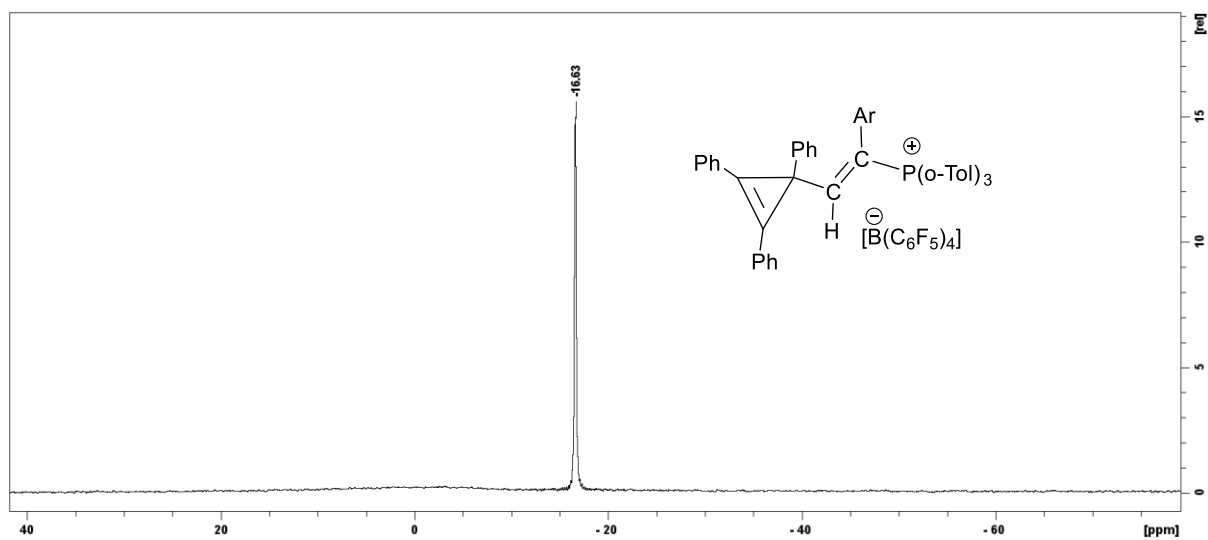

Figure S88.  $^{11}\text{B}$  NMR (127 MHz) spectrum of the compound **16** in  $\text{CDCl}_3$ .

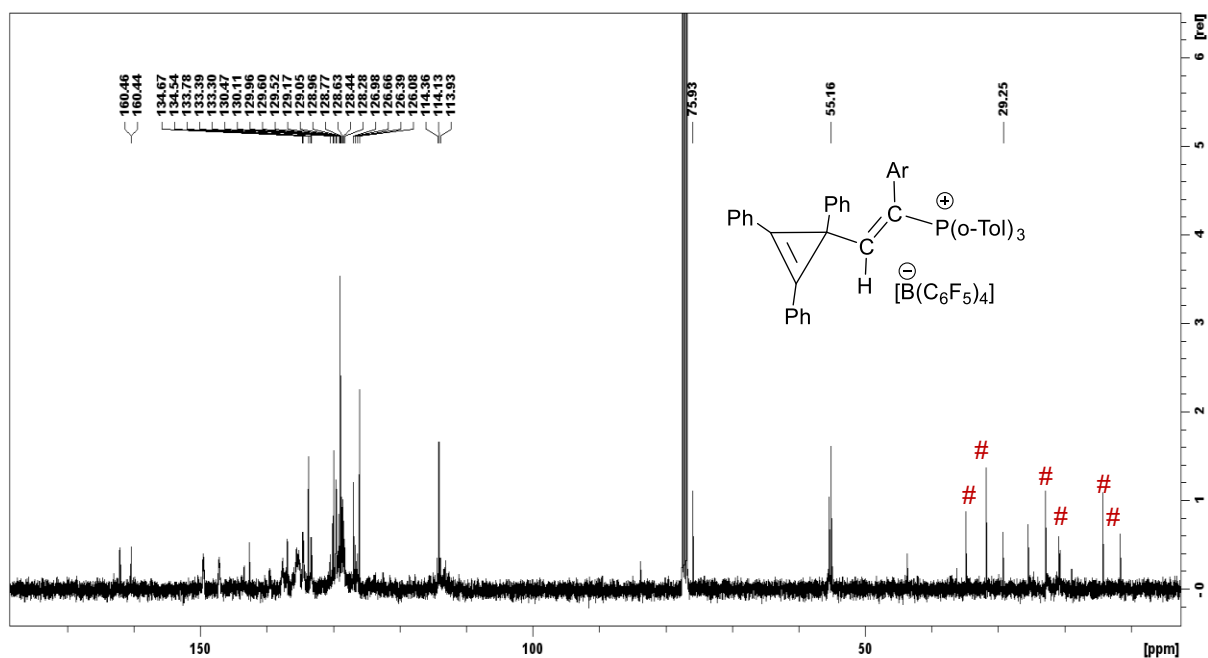

Figure S89.  $^{13}\text{C}$  NMR (101 MHz) spectrum of the compound **16** in  $\text{CDCl}_3$  (\*=  $\text{CDCl}_3$ ;#= unidentified impurities and  $[\text{HP}(o\text{-Tol})_3][\text{B}(\text{C}_6\text{F}_5)_4]$ ).

## HRMS spectra of all the compounds

### Compound 1

#### Target Ion Species

| Ion Species | m/z      | Ionic Formula |
|-------------|----------|---------------|
| M+          | 191.0862 | C15 H11       |

#### MFG Calculator Results

| Target m/z | Ionic Formula | Calc m/z | +/- (mDa) | +/- (ppm) | DBE  | MFG Score |
|------------|---------------|----------|-----------|-----------|------|-----------|
| 191.0862   | C15 H11       | 191.0855 | 0.7       | 3.7       | 10.5 | 96.88     |
| 191.1438   | C13 H19 O     | 191.1430 | 0.8       | 4.2       | 4.5  | 75.33     |

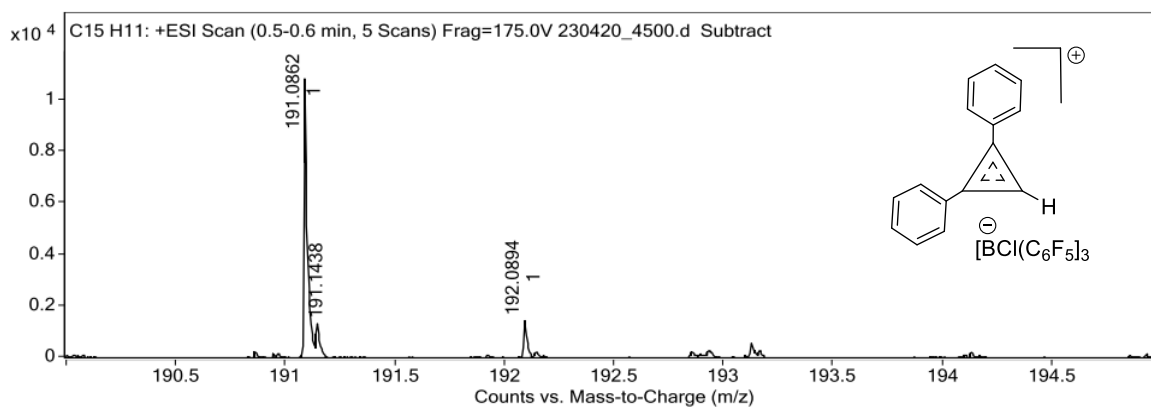

#### Predicted Isotope Match Table

| Isotope | m/z      | Calc m/z | Diff (mDa) | Abund (%) | Calc Abund (%) | +/- |
|---------|----------|----------|------------|-----------|----------------|-----|
| 1       | 191.0862 | 191.0855 | 0.7        | 100.0     | 100.0          | 0.0 |
| 2       | 192.0894 | 192.0889 | 0.5        | 14.5      | 16.4           | 1.9 |
| 3       | 193.0941 | 193.0923 | 1.8        | 1.2       | 1.2            | 0.0 |

Figure S90. HRMS (ESI) spectrum of the compound 1.



## Compound 2b

### Target Ion Species

| Ion Species | m/z      | Ionic Formula |
|-------------|----------|---------------|
| M+          | 267.1176 | C21 H15       |

### MFG Calculator Results

| Target m/z | Ionic Formula | Calc m/z | +/- (mDa) | +/- (ppm) | DBE  | MFG Score |
|------------|---------------|----------|-----------|-----------|------|-----------|
| 267.1176   | C21 H15       | 267.1168 | 0.8       | 3.0       | 14.5 | 97.61     |
| 267.1176   | C9 H19 N2 O7  | 267.1187 | -1.1      | -4.1      | 1.5  | 76.93     |
| 267.1176   | C10 H15 N6 O3 | 267.1200 | -2.4      | -9.0      | 6.5  | 69.11     |

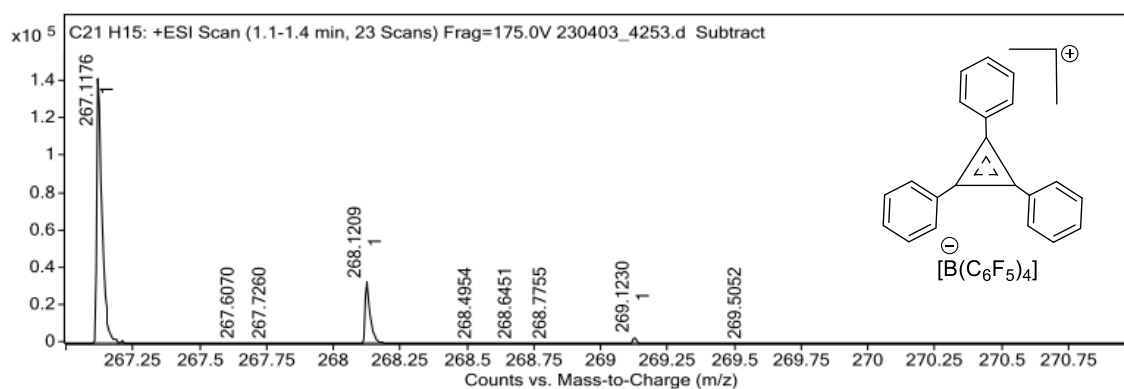

### Predicted Isotope Match Table

| Isotope | m/z      | Calc m/z | Diff (mDa) | Abund (%) | Calc Abund (%) | +/- |
|---------|----------|----------|------------|-----------|----------------|-----|
| 1       | 267.1176 | 267.1168 | 0.8        | 100.0     | 100.0          | 0.0 |
| 2       | 268.1209 | 268.1202 | 0.7        | 21.7      | 22.9           | 1.2 |
| 3       | 269.1230 | 269.1236 | -0.6       | 2.3       | 2.5            | 0.2 |

Figure S91. HRMS (ESI) spectrum of the compound **2b**.

## Compound 3

### Target Ion Species

| Ion Species | m/z      | Ionic Formula |
|-------------|----------|---------------|
| M+          | 447.0236 | C21 H5 F10    |

### MFG Calculator Results

| Target m/z | Ionic Formula    | Calc m/z | +/- (mDa) | +/- (ppm) | DBE  | MFG Score |
|------------|------------------|----------|-----------|-----------|------|-----------|
| 447.0236   | C21 H5 F10       | 447.0226 | 1.0       | 2.2       | 14.5 | 97.59     |
| 447.0236   | C9 H9 F10 N2 O7  | 447.0245 | -0.9      | -2.0      | 1.5  | 79.41     |
| 447.0236   | C10 H5 F10 N6 O3 | 447.0258 | -2.2      | -4.9      | 6.5  | 77.30     |

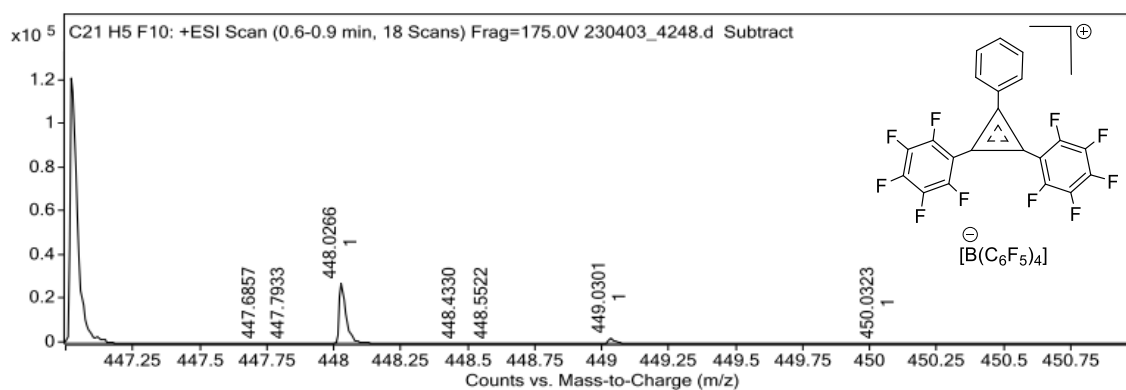

### Predicted Isotope Match Table

| Isotope | m/z      | Calc m/z | Diff (mDa) | Abund (%) | Calc Abund (%) | +/- |
|---------|----------|----------|------------|-----------|----------------|-----|
| 1       | 447.0236 | 447.0226 | 1.0        | 100.0     | 100.0          | 0.0 |
| 2       | 448.0266 | 448.0260 | 0.6        | 21.5      | 22.8           | 1.3 |
| 3       | 449.0301 | 449.0293 | 0.8        | 2.1       | 2.5            | 0.4 |

Figure S92. HRMS (ESI) spectrum of the compound **3**.

## Compound 4a

### Target Ion Species

| Ion Species | m/z      | Ionic Formula |
|-------------|----------|---------------|
| M+          | 536.9769 | C21 F15       |

### MFG Calculator Results

| Target m/z | Ionic Formula   | Calc m/z | +/- (mDa) | +/- (ppm) | DBE  | MFG Score |
|------------|-----------------|----------|-----------|-----------|------|-----------|
| 536.9769   | C21 F15         | 536.9755 | 1.4       | 2.6       | 14.5 | 96.67     |
| 536.9769   | C10 F15 N6 O3   | 536.9787 | -1.8      | -3.4      | 6.5  | 79.19     |
| 536.9769   | C9 H4 F15 N2 O7 | 536.9773 | -0.4      | -0.7      | 1.5  | 79.00     |
| 536.9769   | C14 H4 F15 O5   | 536.9814 | -4.5      | -8.4      | 5.5  | 63.39     |

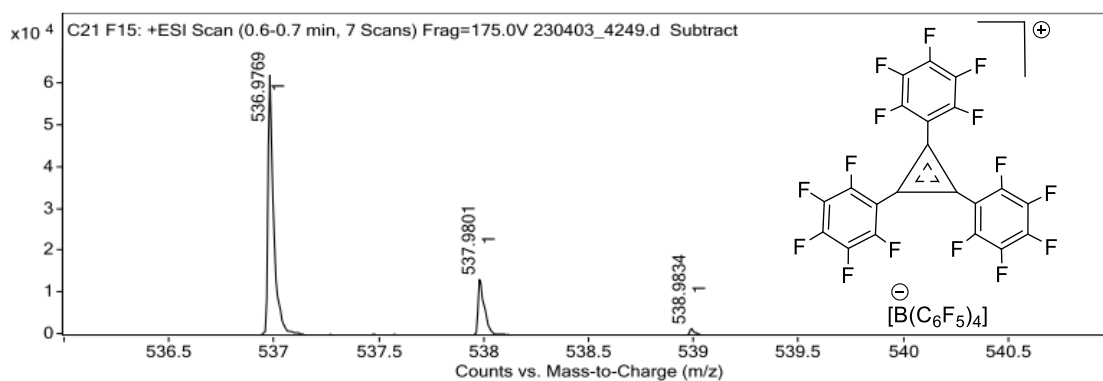

### Predicted Isotope Match Table

| Isotope | m/z      | Calc m/z | Diff (mDa) | Abund (%) | Calc Abund (%) | +/- |
|---------|----------|----------|------------|-----------|----------------|-----|
| 1       | 536.9769 | 536.9755 | 1.4        | 100.0     | 100.0          | 0.0 |
| 2       | 537.9801 | 537.9789 | 1.2        | 22.5      | 22.7           | 0.2 |
| 3       | 538.9834 | 538.9822 | 1.2        | 2.5       | 2.5            | 0.0 |

Figure S93. HRMS (ESI) spectrum of the compound **4a**.

## Compound 8

### Target Ion Species

| Ion Species | m/z      | Ionic Formula |
|-------------|----------|---------------|
| M+          | 453.1761 | C33 H26 P     |

### MFG Calculator Results

| Target m/z | Ionic Formula   | Calc m/z | +/- (mDa) | +/- (ppm) | DBE  | MFG Score |
|------------|-----------------|----------|-----------|-----------|------|-----------|
| 453.1761   | C33 H26 P       | 453.1767 | -0.6      | -1.3      | 21.5 | 88.41     |
| 453.1761   | C23 H25 N4 O6   | 453.1769 | -0.8      | -1.8      | 13.5 | 81.91     |
| 453.1761   | C24 H21 N8 O2   | 453.1782 | -2.1      | -4.6      | 18.5 | 78.81     |
| 453.1761   | C22 H29 O10     | 453.1755 | 0.6       | 1.3       | 8.5  | 76.86     |
| 453.1761   | C17 H26 N8 O5 P | 453.1758 | 0.3       | 0.7       | 9.5  | 70.65     |
| 453.1761   | C21 H30 N2 O7 P | 453.1785 | -2.4      | -5.3      | 8.5  | 69.38     |
| 453.1761   | C19 H21 N10 O4  | 453.1742 | 1.9       | 4.2       | 14.5 | 63.27     |
| 453.1761   | C28 H26 N2 O2 P | 453.1726 | 3.5       | 7.7       | 17.5 | 62.87     |
| 453.1761   | C22 H26 N6 O3 P | 453.1799 | -3.8      | -8.4      | 13.5 | 61.60     |
| 453.1761   | C16 H30 N4 O9 P | 453.1745 | 1.6       | 3.5       | 4.5  | 60.38     |

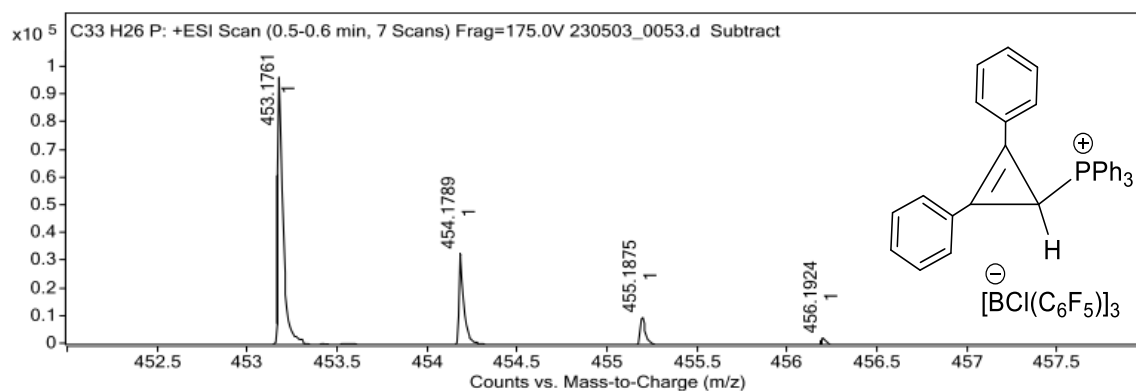

### Predicted Isotope Match Table

| Isotope | m/z      | Calc m/z | Diff (mDa) | Abund (%) | Calc Abund (%) | +/-  |
|---------|----------|----------|------------|-----------|----------------|------|
| 1       | 453.1761 | 453.1767 | -0.6       | 100.0     | 100.0          | 0.0  |
| 2       | 454.1789 | 454.1800 | -1.1       | 35.1      | 36.0           | 0.9  |
| 3       | 455.1875 | 455.1834 | 4.1        | 10.5      | 6.3            | -4.2 |
| 4       | 456.1924 | 456.1868 | 5.6        | 2.7       | 0.7            | -2.0 |

Figure S94. HRMS (ESI) spectrum of the compound **8**.

## Compound 9 and 9'

### Target Ion Species

| Ion Species | m/z     | Ionic Formula                                     |
|-------------|---------|---------------------------------------------------|
| M+          | 709.113 | C <sub>39</sub> H <sub>20</sub> F <sub>10</sub> P |

### MFG Calculator Results

| Target m/z | Ionic Formula                                                                   | Calc m/z | +/- (mDa) | +/- (ppm) | DBE  | MFG Score |
|------------|---------------------------------------------------------------------------------|----------|-----------|-----------|------|-----------|
| 709.1130   | C <sub>39</sub> H <sub>20</sub> F <sub>10</sub> P                               | 709.1137 | -0.7      | -1.0      | 25.5 | 98.59     |
| 709.1130   | C <sub>29</sub> H <sub>19</sub> F <sub>10</sub> N <sub>4</sub> O <sub>6</sub>   | 709.1139 | -0.9      | -1.3      | 17.5 | 88.07     |
| 709.1130   | C <sub>30</sub> H <sub>15</sub> F <sub>10</sub> N <sub>8</sub> O <sub>2</sub>   | 709.1153 | -2.3      | -3.2      | 22.5 | 87.12     |
| 709.1130   | C <sub>28</sub> H <sub>23</sub> F <sub>10</sub> O <sub>10</sub>                 | 709.1126 | 0.4       | 0.6       | 12.5 | 84.77     |
| 709.1130   | C <sub>34</sub> H <sub>20</sub> F <sub>10</sub> N <sub>2</sub> O <sub>2</sub> P | 709.1097 | 3.3       | 4.7       | 21.5 | 83.39     |
| 709.1130   | C <sub>25</sub> H <sub>15</sub> F <sub>10</sub> N <sub>10</sub> O <sub>4</sub>  | 709.1113 | 1.7       | 2.4       | 18.5 | 79.53     |
| 709.1130   | C <sub>27</sub> H <sub>24</sub> F <sub>10</sub> N <sub>2</sub> O <sub>7</sub> P | 709.1156 | -2.6      | -3.7      | 12.5 | 76.50     |
| 709.1130   | C <sub>36</sub> H <sub>15</sub> F <sub>10</sub> N <sub>4</sub> O                | 709.1081 | 4.9       | 6.9       | 26.5 | 74.45     |
| 709.1130   | C <sub>28</sub> H <sub>20</sub> F <sub>10</sub> N <sub>6</sub> O <sub>3</sub> P | 709.1169 | -3.9      | -5.5      | 17.5 | 72.51     |
| 709.1130   | C <sub>34</sub> H <sub>19</sub> F <sub>10</sub> N <sub>2</sub> O <sub>4</sub>   | 709.1180 | -5.0      | -7.1      | 21.5 | 72.24     |

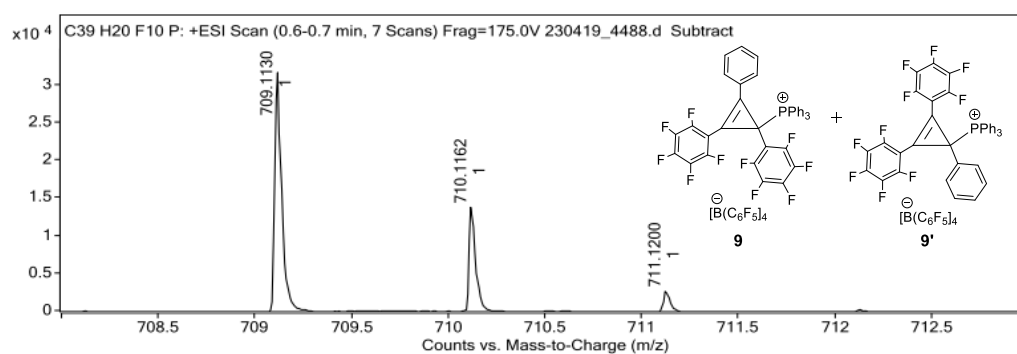

### Predicted Isotope Match Table

| Isotope | m/z      | Calc m/z | Diff (mDa) | Abund (%) | Calc Abund (%) | +/-  |
|---------|----------|----------|------------|-----------|----------------|------|
| 1       | 709.1130 | 709.1137 | -0.7       | 100.0     | 100.0          | 0.0  |
| 2       | 710.1162 | 710.1171 | -0.9       | 43.6      | 42.4           | -1.2 |
| 3       | 711.1200 | 711.1205 | -0.5       | 9.0       | 8.8            | -0.2 |

Figure S95. HRMS (ESI, Positive) spectrum of the compounds **9** and **9'**.

## Compound 10

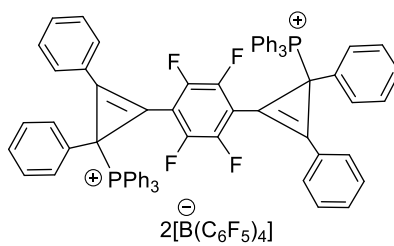

### MALDI-TOF Mass Spectrum

Data File: 230405\_42990\_D16\1

Matrix: none, ACN

Sample Name: DM-4-36

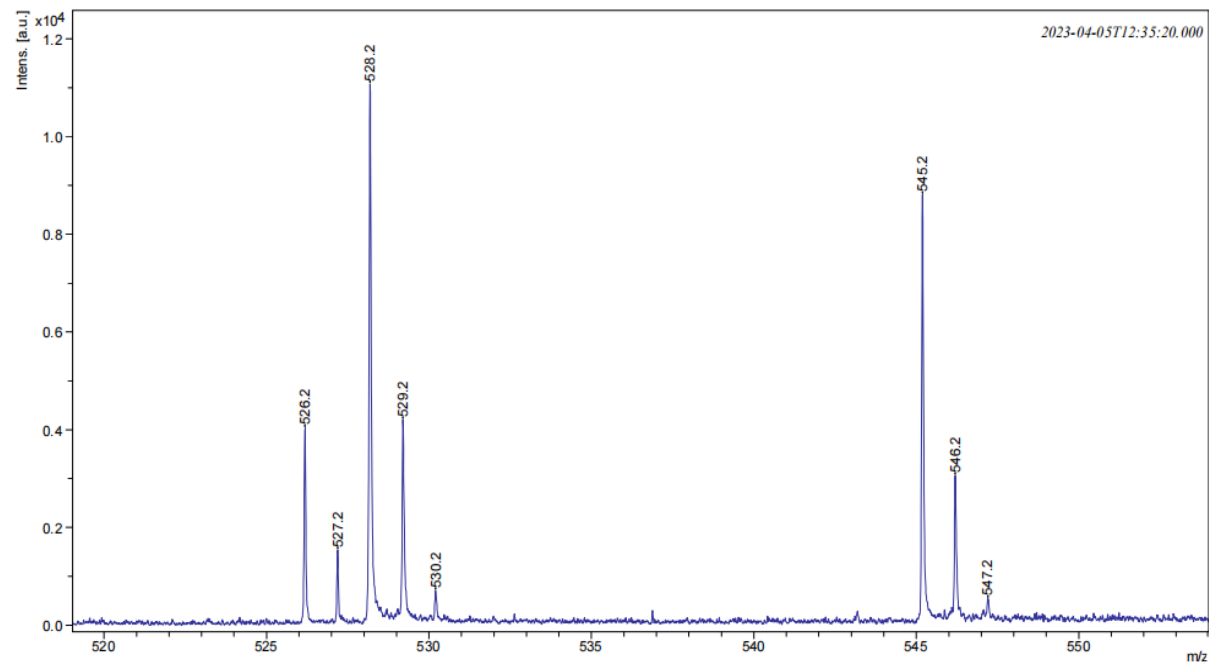

AIMS Mass Spectrometry Laboratory - Chemistry - University of Toronto

printed: 4/5/2023 12:36:48 PM

Figure S96. MS (MALDI-TOF) spectrum of the compound **10**.

## Compound 11

### Target Ion Species

| Ion Species | m/z      | Ionic Formula |
|-------------|----------|---------------|
| M+          | 601.3595 | C42 H50 O P   |

### MFG Calculator Results

| Target m/z | Ionic Formula   | Calc m/z | +/- (mDa) | +/- (ppm) | DBE  | MFG Score |
|------------|-----------------|----------|-----------|-----------|------|-----------|
| 601.3595   | C42 H50 O P     | 601.3594 | 0.1       | 0.2       | 18.5 | 99.20     |
| 601.3595   | C44 H45 N2      | 601.3577 | 1.8       | 3.0       | 23.5 | 94.39     |
| 601.3595   | C32 H49 N4 O7   | 601.3596 | -0.1      | -0.2      | 10.5 | 94.23     |
| 601.3595   | C33 H45 N8 O3   | 601.3609 | -1.4      | -2.3      | 15.5 | 93.81     |
| 601.3595   | C31 H53 O11     | 601.3582 | 1.3       | 2.2       | 5.5  | 88.71     |
| 601.3595   | C26 H50 N8 O6 P | 601.3585 | 1.0       | 1.7       | 6.5  | 85.02     |
| 601.3595   | C30 H54 N2 O8 P | 601.3612 | -1.7      | -2.8      | 5.5  | 84.32     |
| 601.3595   | C28 H45 N10 O5  | 601.3569 | 2.6       | 4.3       | 11.5 | 80.91     |
| 601.3595   | C31 H50 N6 O4 P | 601.3626 | -3.1      | -5.2      | 10.5 | 79.83     |
| 601.3595   | C37 H50 N2 O3 P | 601.3554 | 4.1       | 6.8       | 14.5 | 78.99     |

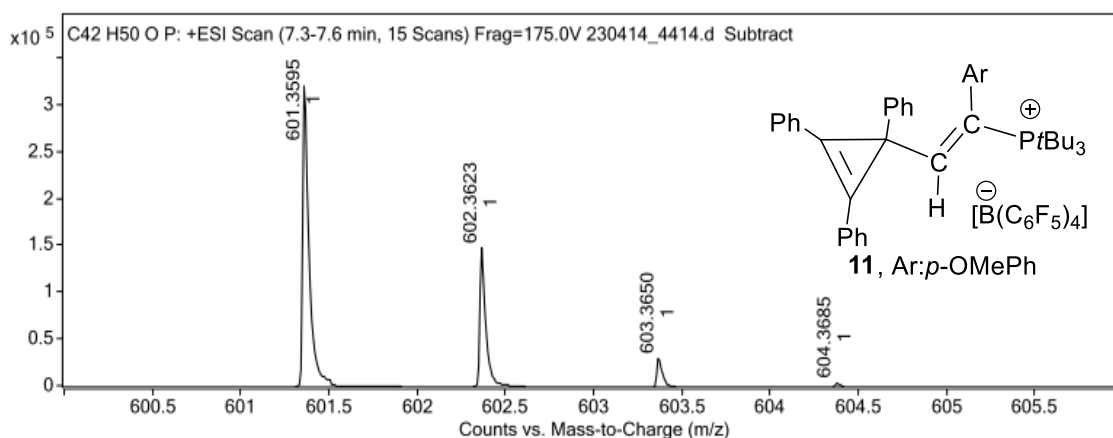

### Predicted Isotope Match Table

| Isotope | m/z      | Calc m/z | Diff (mDa) | Abund (%) | Calc Abund (%) | +/- |
|---------|----------|----------|------------|-----------|----------------|-----|
| 1       | 601.3595 | 601.3594 | 0.1        | 100.0     | 100.0          | 0.0 |
| 2       | 602.3623 | 602.3628 | -0.5       | 44.6      | 46.0           | 1.4 |
| 3       | 603.3650 | 603.3661 | -1.1       | 9.8       | 10.6           | 0.8 |
| 4       | 604.3685 | 604.3694 | -0.9       | 1.4       | 1.6            | 0.2 |

Figure S97. HRMS (ESI, Positive) spectrum of the compound **11**.

## Compound 12

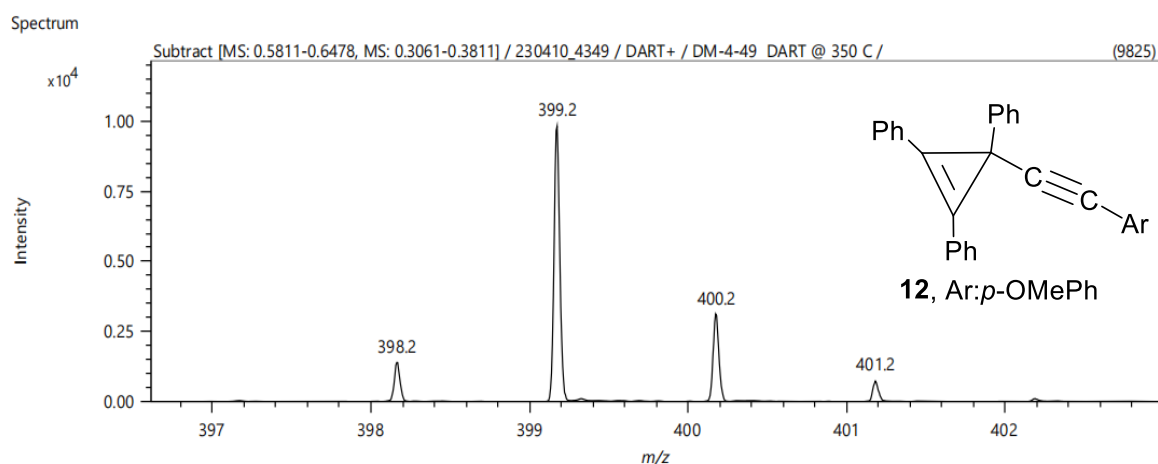

### Elemental Composition

| Parameters |                 | Elements Set 2: |    |     |    |    |
|------------|-----------------|-----------------|----|-----|----|----|
| Tolerance: | $\pm 10.00$ mDa | Symbol          | C  | H   | N  | O  |
| Electron:  | Odd/Even        | Min             | 0  | 0   | 0  | 0  |
| Charge:    | +1              | Max             | 50 | 100 | 10 | 20 |
| DBE:       | -1.5 - 100.0    |                 |    |     |    |    |

### Results

| Mass      | Intensity | Formula        | Calculated Mass | Mass Difference [mDa] | Mass Difference [ppm] | DBE  |
|-----------|-----------|----------------|-----------------|-----------------------|-----------------------|------|
| 399.17370 | 9825.39   | C15 H29 N O11  | 399.17351       | 0.18                  | 0.46                  | 2.0  |
|           |           | C14 H23 N8 O6  | 399.17351       | 0.19                  | 0.48                  | 7.5  |
|           |           | C30 H23 O      | 399.17434       | -0.64                 | -1.61                 | 19.5 |
|           |           | C28 H21 N3     | 399.17300       | 0.70                  | 1.75                  | 20.0 |
|           |           | C16 H25 N5 O7  | 399.17485       | -1.15                 | -2.89                 | 7.0  |
|           |           | C13 H27 N4 O10 | 399.17217       | 1.53                  | 3.83                  | 2.5  |
|           |           | C17 H21 N9 O3  | 399.17619       | -2.49                 | -6.24                 | 12.0 |
|           |           | C18 H27 N2 O8  | 399.17619       | -2.50                 | -6.25                 | 6.5  |
|           |           | C11 H25 N7 O9  | 399.17083       | 2.87                  | 7.19                  | 3.0  |
|           |           | C25 H23 N2 O3  | 399.17032       | 3.38                  | 8.46                  | 15.5 |
|           |           | C19 H23 N6 O4  | 399.17753       | -3.83                 | -9.60                 | 11.5 |
|           |           | C9 H23 N10 O8  | 399.16948       | 4.21                  | 10.55                 | 3.5  |
|           |           | C23 H21 N5 O2  | 399.16898       | 4.72                  | 11.83                 | 16.0 |
|           |           | C20 H19 N10    | 399.17887       | -5.17                 | -12.95                | 16.5 |
|           |           | C21 H25 N3 O5  | 399.17887       | -5.18                 | -12.96                | 11.0 |
|           |           | C8 H27 N6 O12  | 399.16815       | 5.55                  | 13.90                 | -1.5 |
|           |           | C7 H27 N8 O11  | 399.17938       | -5.68                 | -14.24                | -1.5 |
|           |           | C22 H25 N O6   | 399.16764       | 6.06                  | 15.18                 | 11.0 |
|           |           | C21 H19 N8 O   | 399.16763       | 6.06                  | 15.19                 | 16.5 |
|           |           | C22 H21 N7 O   | 399.18021       | -6.51                 | -16.32                | 16.0 |
|           |           | C23 H27 O6     | 399.18022       | -6.52                 | -16.33                | 10.5 |
|           |           | C6 H25 N9 O11  | 399.16680       | 6.89                  | 17.27                 | -1.0 |
|           |           | C20 H23 N4 O5  | 399.16630       | 7.40                  | 18.54                 | 11.5 |
|           |           | C24 H23 N4 O2  | 399.18155       | -7.86                 | -19.68                | 15.5 |
|           |           | C10 H25 N9 O8  | 399.18206       | -8.36                 | -20.95                | 3.0  |
|           |           | C19 H27 O9     | 399.16496       | 8.74                  | 21.89                 | 6.5  |
|           |           | C18 H21 N7 O4  | 399.16495       | 8.74                  | 21.90                 | 12.0 |
|           |           | C26 H25 N O3   | 399.18290       | -9.20                 | -23.04                | 15.0 |
|           |           | C12 H27 N6 O9  | 399.18340       | -9.71                 | -24.31                | 2.5  |

Figure S98. HRMS (DART) spectrum of the compound **12**.



# Compound 13

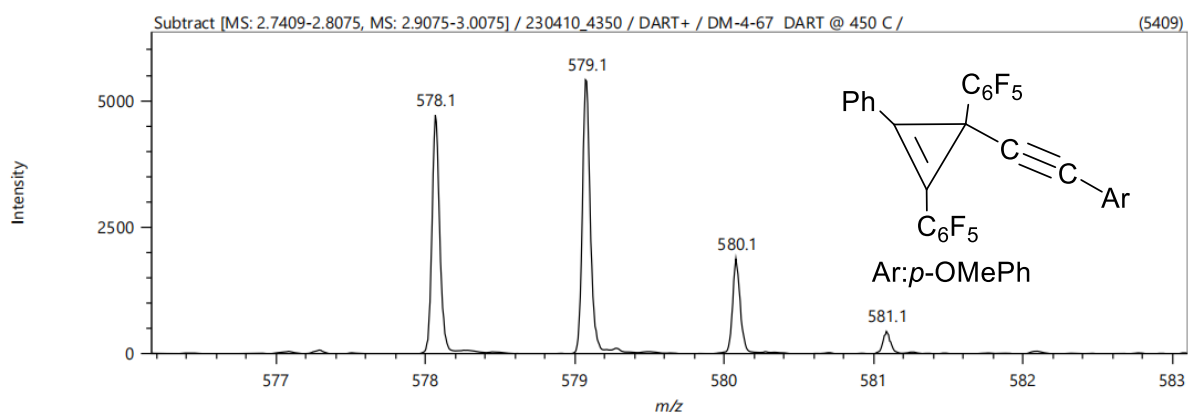

## Elemental Composition

| Parameters |              | Elements Set 2: |    |     |    |    |    |
|------------|--------------|-----------------|----|-----|----|----|----|
| Tolerance: | ±10.00 mDa   | Symbol          | C  | H   | N  | O  | F  |
| Electron:  | Odd/Even     | Min             | 0  | 0   | 0  | 0  | 10 |
| Charge:    | +1           | Max             | 50 | 100 | 10 | 20 | 10 |
| DBE:       | -1.5 - 100.0 |                 |    |     |    |    |    |

## Results

| Mass      | Intensity | Formula            | Calculated Mass | Mass Difference [mDa] | Mass Difference [ppm] | DBE  |
|-----------|-----------|--------------------|-----------------|-----------------------|-----------------------|------|
| 579.07939 | 5408.88   | C15 H19 N O11 F10  | 579.07929       | 0.09                  | 0.16                  | 2.0  |
|           |           | C14 H13 N8 O6 F10  | 579.07929       | 0.10                  | 0.17                  | 7.5  |
|           |           | C28 H11 N3 F10     | 579.07878       | 0.61                  | 1.05                  | 20.0 |
|           |           | C30 H13 O F10      | 579.08012       | -0.74                 | -1.27                 | 19.5 |
|           |           | C16 H15 N5 O7 F10  | 579.08063       | -1.24                 | -2.15                 | 7.0  |
|           |           | C13 H17 N4 O10 F10 | 579.07795       | 1.44                  | 2.48                  | 2.5  |
| Mass      | Intensity | Formula            | Calculated Mass | Mass Difference [mDa] | Mass Difference [ppm] | DBE  |
|           |           | C17 H11 N9 O3 F10  | 579.08197       | -2.58                 | -4.46                 | 12.0 |
|           |           | C18 H17 N2 O8 F10  | 579.08197       | -2.59                 | -4.47                 | 6.5  |
|           |           | C11 H15 N7 O9 F10  | 579.07661       | 2.78                  | 4.80                  | 3.0  |
|           |           | C25 H13 N2 O3 F10  | 579.07610       | 3.29                  | 5.68                  | 15.5 |
|           |           | C19 H13 N6 O4 F10  | 579.08331       | -3.92                 | -6.78                 | 11.5 |
|           |           | C9 H13 N10 O8 F10  | 579.07527       | 4.12                  | 7.12                  | 3.5  |
|           |           | C23 H11 N5 O2 F10  | 579.07476       | 4.63                  | 7.99                  | 16.0 |
|           |           | C20 H9 N10 F10     | 579.08465       | -5.26                 | -9.09                 | 16.5 |
|           |           | C21 H15 N3 O5 F10  | 579.08465       | -5.27                 | -9.10                 | 11.0 |
|           |           | C8 H17 N6 O12 F10  | 579.07393       | 5.46                  | 9.43                  | -1.5 |
|           |           | C7 H17 N8 O11 F10  | 579.08516       | -5.77                 | -9.97                 | -1.5 |
|           |           | C22 H15 N O6 F10   | 579.07342       | 5.97                  | 10.30                 | 11.0 |
|           |           | C21 H9 N8 O F10    | 579.07342       | 5.97                  | 10.31                 | 16.5 |
|           |           | C22 H11 N7 O F10   | 579.08599       | -6.60                 | -11.40                | 16.0 |
|           |           | C23 H17 O6 F10     | 579.08600       | -6.61                 | -11.41                | 10.5 |
|           |           | C6 H15 N9 O11 F10  | 579.07259       | 6.80                  | 11.75                 | -1.0 |
|           |           | C20 H13 N4 O5 F10  | 579.07208       | 7.31                  | 12.62                 | 11.5 |
|           |           | C24 H13 N4 O2 F10  | 579.08733       | -7.95                 | -13.72                | 15.5 |
|           |           | C10 H15 N9 O8 F10  | 579.08784       | -8.45                 | -14.60                | 3.0  |
|           |           | C19 H17 O9 F10     | 579.07074       | 8.65                  | 14.93                 | 6.5  |
|           |           | C18 H11 N7 O4 F10  | 579.07074       | 8.65                  | 14.94                 | 12.0 |
|           |           | C26 H15 N O3 F10   | 579.08868       | -9.29                 | -16.04                | 15.0 |
|           |           | C12 H17 N6 O9 F10  | 579.08918       | -9.80                 | -16.92                | 2.5  |
|           |           | C17 H15 N3 O8 F10  | 579.06940       | 9.99                  | 17.25                 | 7.0  |
|           |           | C16 H9 N10 O3 F10  | 579.06939       | 9.99                  | 17.26                 | 12.5 |

Figure S99. HRMS (DART) spectrum of the compound **13**.

# Compound 14

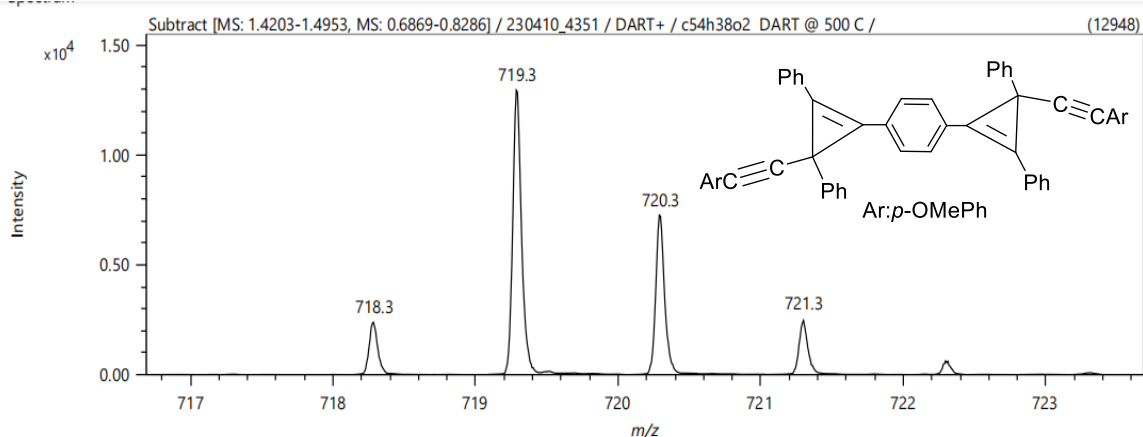

## Elemental Composition

### Parameters

Tolerance:  $\pm 10.00$  mDa  
 Electron: Odd/Even  
 Charge: +1  
 DBE: -1.5 - 100.0

### Elements Set 2:

| Symbol | C   | H   | N  | O  |
|--------|-----|-----|----|----|
| Min    | 0   | 0   | 0  | 0  |
| Max    | 100 | 200 | 10 | 20 |

## Results

| Mass      | Intensity | Formula         | Calculated Mass | Mass Difference [mDa] | Mass Difference [ppm] | DBE  |
|-----------|-----------|-----------------|-----------------|-----------------------|-----------------------|------|
| 719.29404 | 12948.39  | C25 H47 N6 O18  | 719.29414       | -0.10                 | -0.14                 | 5.5  |
|           |           | C39 H45 N O12   | 719.29363       | 0.41                  | 0.57                  | 18.0 |
|           |           | C38 H39 N8 O7   | 719.29362       | 0.41                  | 0.58                  | 23.5 |
|           |           | C54 H39 O2      | 719.29446       | -0.42                 | -0.58                 | 35.5 |
|           |           | C52 H37 N3 O    | 719.29311       | 0.92                  | 1.28                  | 36.0 |
|           |           | C40 H41 N5 O8   | 719.29496       | -0.93                 | -1.29                 | 23.0 |
|           |           |                 |                 |                       |                       |      |
|           |           | C23 H45 N9 O17  | 719.29279       | 1.24                  | 1.73                  | 6.0  |
|           |           | C26 H43 N10 O14 | 719.29547       | -1.44                 | -2.00                 | 10.5 |
|           |           | C27 H49 N3 O19  | 719.29548       | -1.44                 | -2.00                 | 5.0  |
|           |           | C37 H43 N4 O11  | 719.29228       | 1.75                  | 2.44                  | 18.5 |
|           |           | C50 H35 N6      | 719.29177       | 2.26                  | 3.15                  | 36.5 |
|           |           | C41 H37 N9 O4   | 719.29630       | -2.27                 | -3.15                 | 28.0 |
|           |           | C42 H43 N2 O9   | 719.29631       | -2.27                 | -3.16                 | 22.5 |
|           |           | C28 H45 N7 O15  | 719.29682       | -2.78                 | -3.86                 | 10.0 |
|           |           | C29 H51 O20     | 719.29682       | -2.78                 | -3.87                 | 4.5  |
|           |           | C36 H47 O15     | 719.29095       | 3.09                  | 4.29                  | 13.5 |
|           |           | C35 H41 N7 O10  | 719.29094       | 3.09                  | 4.30                  | 19.0 |
|           |           | C49 H39 N2 O4   | 719.29043       | 3.60                  | 5.01                  | 31.5 |
|           |           | C43 H39 N6 O5   | 719.29764       | -3.61                 | -5.02                 | 27.5 |
|           |           | C20 H47 N8 O20  | 719.29011       | 3.92                  | 5.46                  | 1.5  |
|           |           | C30 H47 N4 O16  | 719.29816       | -4.12                 | -5.73                 | 9.5  |
|           |           | C34 H45 N3 O14  | 719.28960       | 4.43                  | 6.16                  | 14.0 |
|           |           | C33 H39 N10 O9  | 719.28960       | 4.44                  | 6.17                  | 19.5 |
|           |           | C47 H37 N5 O3   | 719.28909       | 4.94                  | 6.87                  | 32.0 |
|           |           | C44 H35 N10 O   | 719.29898       | -4.95                 | -6.88                 | 32.5 |
|           |           | C45 H41 N3 O6   | 719.29899       | -4.95                 | -6.88                 | 27.0 |
|           |           | C31 H43 N8 O12  | 719.29950       | -5.46                 | -7.59                 | 14.5 |
|           |           | C32 H49 N O17   | 719.29950       | -5.46                 | -7.60                 | 9.0  |
|           |           | C32 H43 N6 O13  | 719.28826       | 5.77                  | 8.03                  | 14.5 |
|           |           | C46 H41 N O7    | 719.28775       | 6.28                  | 8.73                  | 27.0 |
|           |           | C45 H35 N8 O2   | 719.28775       | 6.29                  | 8.74                  | 32.5 |
|           |           | C46 H37 N7 O2   | 719.30032       | -6.29                 | -8.74                 | 32.0 |
|           |           | C47 H43 O7      | 719.30033       | -6.29                 | -8.75                 | 26.5 |
|           |           | C33 H45 N5 O13  | 719.30084       | -6.80                 | -9.46                 | 14.0 |
|           |           | C31 H47 N2 O17  | 719.28692       | 7.11                  | 9.89                  | 9.5  |
|           |           | C30 H41 N9 O12  | 719.28692       | 7.12                  | 9.89                  | 15.0 |
|           |           | C19 H47 N10 O19 | 719.30135       | -7.31                 | -10.16                | 1.5  |
|           |           | C44 H39 N4 O6   | 719.28641       | 7.63                  | 10.60                 | 27.5 |
|           |           | C48 H39 N4 O3   | 719.30167       | -7.63                 | -10.61                | 31.5 |

Figure S100. HRMS (DART) spectrum of the compound **14**.

## Compound 15

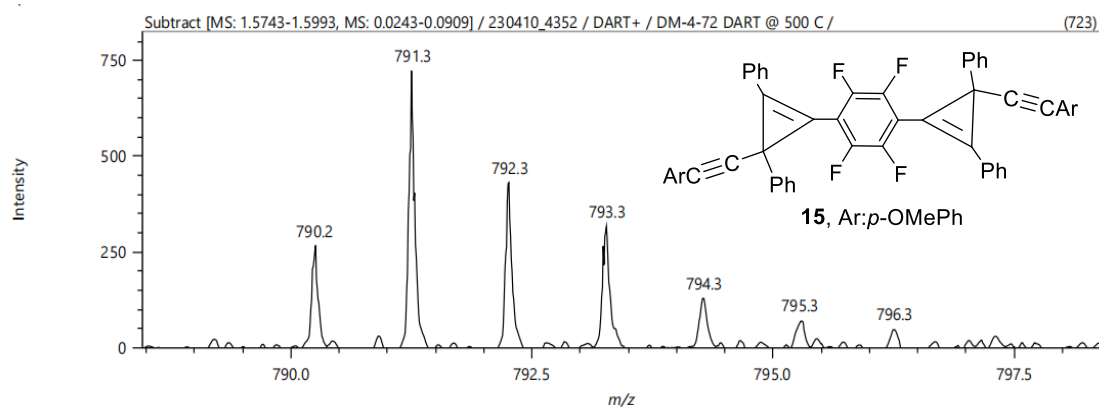

### Elemental Composition

| Parameters |              | Elements Set 1: |     |     |    |    |   |
|------------|--------------|-----------------|-----|-----|----|----|---|
| Tolerance: | ±10.00 mDa   | Symbol          | C   | H   | O  | N  | F |
| Electron:  | Odd/Even     | Min             | 0   | 0   | 0  | 0  | 4 |
| Charge:    | +1           | Max             | 100 | 200 | 20 | 10 | 4 |
| DBE:       | -1.5 - 100.0 |                 |     |     |    |    |   |

### Results

| Mass      | Intensity | Formula            | Calculated Mass | Mass Difference [mDa] | Mass Difference [ppm] | DBE  |
|-----------|-----------|--------------------|-----------------|-----------------------|-----------------------|------|
| 791.25856 | 723.37    | C41 H33 N9 O4 F4   | 791.25861       | -0.05                 | -0.07                 | 28.0 |
|           |           | C42 H39 N2 O9 F4   | 791.25862       | -0.06                 | -0.07                 | 22.5 |
|           |           | C28 H41 N7 O15 F4  | 791.25913       | -0.57                 | -0.72                 | 10.0 |
|           |           | C29 H47 O20 F4     | 791.25913       | -0.57                 | -0.72                 | 4.5  |
|           |           | C27 H45 N3 O19 F4  | 791.25779       | 0.77                  | 0.97                  | 5.0  |
|           |           | C26 H39 N10 O14 F4 | 791.25779       | 0.78                  | 0.98                  | 10.5 |

| Mass | Intensity | Formula            | Calculated Mass | Mass Difference [mDa] | Mass Difference [ppm] | DBE  |
|------|-----------|--------------------|-----------------|-----------------------|-----------------------|------|
|      |           | C40 H37 N5 O8 F4   | 791.25728       | 1.28                  | 1.62                  | 23.0 |
|      |           | C43 H35 N6 O5 F4   | 791.25996       | -1.40                 | -1.76                 | 27.5 |
|      |           | C54 H35 O2 F4      | 791.25677       | 1.79                  | 2.26                  | 35.5 |
|      |           | C30 H43 N4 O16 F4  | 791.26047       | -1.91                 | -2.41                 | 9.5  |
|      |           | C25 H43 N6 O18 F4  | 791.25645       | 2.11                  | 2.67                  | 5.5  |
|      |           | C39 H41 N O12 F4   | 791.25594       | 2.62                  | 3.31                  | 18.0 |
|      |           | C38 H35 N8 O7 F4   | 791.25593       | 2.63                  | 3.32                  | 23.5 |
|      |           | C44 H31 N10 O F4   | 791.26129       | -2.73                 | -3.45                 | 32.5 |
|      |           | C45 H37 N3 O6 F4   | 791.26130       | -2.74                 | -3.46                 | 27.0 |
|      |           | C52 H33 N3 O F4    | 791.25543       | 3.13                  | 3.96                  | 36.0 |
|      |           | C31 H39 N8 O12 F4  | 791.26181       | -3.25                 | -4.10                 | 14.5 |
|      |           | C32 H45 N O17 F4   | 791.26181       | -3.25                 | -4.11                 | 9.0  |
|      |           | C23 H41 N9 O17 F4  | 791.25511       | 3.46                  | 4.37                  | 6.0  |
|      |           | C37 H39 N4 O11 F4  | 791.25460       | 3.96                  | 5.01                  | 18.5 |
|      |           | C46 H33 N7 O2 F4   | 791.26264       | -4.08                 | -5.15                 | 32.0 |
|      |           | C47 H39 O7 F4      | 791.26264       | -4.08                 | -5.16                 | 26.5 |
|      |           | C50 H31 N6 F4      | 791.25408       | 4.48                  | 5.66                  | 36.5 |
|      |           | C33 H41 N5 O13 F4  | 791.26315       | -4.59                 | -5.80                 | 14.0 |
|      |           | C19 H43 N10 O19 F4 | 791.26366       | -5.10                 | -6.44                 | 1.5  |
|      |           | C36 H43 O15 F4     | 791.25326       | 5.30                  | 6.70                  | 13.5 |
|      |           | C35 H37 N7 O10 F4  | 791.25325       | 5.31                  | 6.71                  | 19.0 |
|      |           | C48 H35 N4 O3 F4   | 791.26398       | -5.42                 | -6.85                 | 31.5 |
|      |           | C49 H35 N2 O4 F4   | 791.25275       | 5.81                  | 7.35                  | 31.5 |
|      |           | C34 H37 N9 O9 F4   | 791.26449       | -5.93                 | -7.49                 | 19.0 |
|      |           | C35 H43 N2 O14 F4  | 791.26449       | -5.93                 | -7.50                 | 13.5 |
|      |           | C20 H43 N8 O20 F4  | 791.25243       | 6.14                  | 7.76                  | 1.5  |
|      |           | C21 H45 N7 O20 F4  | 791.26500       | -6.44                 | -8.14                 | 1.0  |
|      |           | C34 H41 N3 O14 F4  | 791.25192       | 6.64                  | 8.40                  | 14.0 |
|      |           | C33 H35 N10 O9 F4  | 791.25191       | 6.65                  | 8.40                  | 19.5 |
|      |           | C50 H37 N O4 F4    | 791.26532       | -6.76                 | -8.55                 | 31.0 |
|      |           | C47 H33 N5 O3 F4   | 791.25140       | 7.16                  | 9.05                  | 32.0 |
|      |           | C36 H39 N6 O10 F4  | 791.26583       | -7.27                 | -9.19                 | 18.5 |
|      |           | C32 H39 N6 O13 F4  | 791.25057       | 7.99                  | 10.09                 | 14.5 |

Figure S101. HRMS (DART) spectrum of the compound **15**.

## Compound 16

### Target Ion Species

| Ion Species | m/z      | Ionic Formula |
|-------------|----------|---------------|
| M+          | 703.3122 | C51 H44 O P   |

### MFG Calculator Results

| Target m/z | Ionic Formula   | Calc m/z | +/- (mDa) | +/- (ppm) | DBE  | MFG Score |
|------------|-----------------|----------|-----------|-----------|------|-----------|
| 703.3122   | C51 H44 O P     | 703.3124 | -0.2      | -0.3      | 30.5 | 99.27     |
| 703.3122   | C53 H39 N2      | 703.3108 | 1.4       | 2.0       | 35.5 | 96.40     |
| 703.3122   | C41 H43 N4 O7   | 703.3126 | -0.4      | -0.6      | 22.5 | 96.17     |
| 703.3122   | C42 H39 N8 O3   | 703.3140 | -1.8      | -2.6      | 27.5 | 94.43     |
| 703.3122   | C40 H47 O11     | 703.3113 | 0.9       | 1.3       | 17.5 | 92.98     |
| 703.3122   | C35 H44 N8 O6 P | 703.3116 | 0.6       | 0.9       | 18.5 | 89.80     |
| 703.3122   | C39 H48 N2 O8 P | 703.3143 | -2.1      | -3.0      | 17.5 | 87.31     |
| 703.3122   | C37 H39 N10 O5  | 703.3099 | 2.3       | 3.3       | 23.5 | 87.15     |
| 703.3122   | C46 H44 N2 O3 P | 703.3084 | 3.8       | 5.4       | 26.5 | 84.46     |
| 703.3122   | C40 H44 N6 O4 P | 703.3156 | -3.4      | -4.8      | 22.5 | 82.46     |

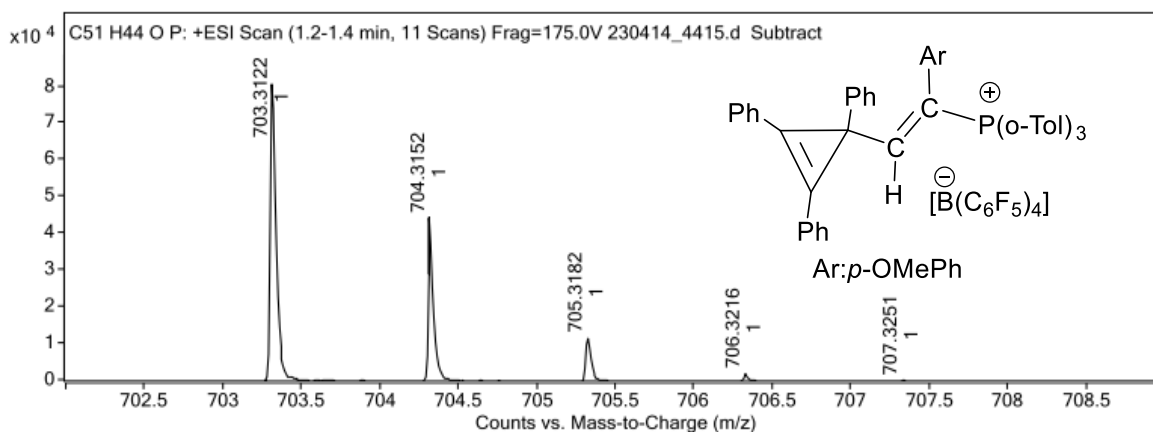

### Predicted Isotope Match Table

| Isotope | m/z      | Calc m/z | Diff (mDa) | Abund (%) | Calc Abund (%) | +/- |
|---------|----------|----------|------------|-----------|----------------|-----|
| 1       | 703.3122 | 703.3124 | -0.2       | 100.0     | 100.0          | 0.0 |
| 2       | 704.3152 | 704.3158 | -0.6       | 53.6      | 55.7           | 2.1 |
| 3       | 705.3182 | 705.3192 | -1.0       | 14.3      | 15.4           | 1.1 |
| 4       | 706.3216 | 706.3225 | -0.9       | 2.8       | 2.8            | 0.0 |

Figure S102. HRMS (ESI, Positive) spectrum of the compound **16**.

## Experimental references

1. G. M. Sheldrick, *Acta Cryst. Sec. A*, 2008, **64**, 112-122.
2. O. V. Dolomanov, L. J. Bourhis, R. J. Gildea, J. A. K. Howard and H. Puschmann, *J. Appl. Crystallogr.*, 2009, **42**, 339-341.
3. T. A. Gazis, A. Dasgupta, M. S. Hill, J. M. Rawson, T. Wirth and R. L. Melen, *Dalton Trans.*, 2019, **48**, 12391-12395.
4. K. Hara, R. Akiyama and M. Sawamura, *Org. Lett.*, 2005, 7, 25, 5621–5623.
5. A. Padwa and D. Eastman, *J. Org. Chem.*, 1969, **34**, 2728–2732.
6. B. D. Dherange, P. Q. Kelly, J. P. Liles, M. S. Sigman and M. D. Levin, *J. Am. Chem. Soc.* 2021, **143**, 11337–11344.
7. L. Wang, R. A. Moss and K. K.-Jespersen, *J. Phys. Chem. A*, 2011, **115**, 8113–8118.

## Computational details

The quantum chemical DFT calculations have been performed with the TURBOMOLE 7.4 suite of programs<sup>[1]</sup> The initial structures generated according to their Lewis structures are checked with the CREST method using the xTB program for low-lying conformers as input.<sup>[2]</sup> The structures are fully optimized at the TPSS-D3/def2-TZVP + COSMO level of theory, which combines the TPSS meta-GGA density functional<sup>[3]</sup> with the BJ-damped DFT-D3 dispersion correction<sup>[4]</sup> and the def2-TZVP basis set,<sup>[5]</sup> using the Conductor-like Screening Model (COSMO) continuum solvation model<sup>[6]</sup> for CH<sub>2</sub>Cl<sub>2</sub> solvent (dielectric constant  $\epsilon = 8.93$  and solvent radius  $R_{\text{solv}} = 2.94 \text{ \AA}$ ). The density-fitting RI-J approach<sup>[5a, 7]</sup> is used to accelerate the geometry optimization and numerical harmonic frequency calculations<sup>[8]</sup> in solution. The optimized structures are characterized by frequency analysis to identify the nature of located stationary points (no imaginary frequency for true minima and only one imaginary frequency for transition state) and to provide thermal corrections (at 298.15 K and 1 atm) according to the modified ideal gas–rigid rotor–harmonic oscillator model.<sup>[9]</sup> This choice of dispersion-corrected meta-GGA functional makes the efficient exploration of all potential reaction paths possible.

The final solvation free energies in CH<sub>2</sub>Cl<sub>2</sub> solution are computed with the COSMO-RS solvation model<sup>[10]</sup> (parameter file: BP\_TZVP\_C30\_1601.ctd) using the COSMOtherm program package<sup>[11]</sup> on the above TPSS-D3 optimized structures, and corrected by  $+1.89 \text{ kcal}\cdot\text{mol}^{-1}$  to account for higher reference solute concentration of  $1 \text{ mol}\cdot\text{L}^{-1}$  usually used in solution. To check the effects of the chosen DFT functional on the reaction energies and barriers, single-point calculations at the meta-GGA TPSS-D3<sup>[3]</sup> and hybrid-meta-GGA PW6B95-D3<sup>[12]</sup> levels are performed using a larger def2-QZVP basis set.<sup>[5b, 13]</sup> The final reaction Gibbs free energies ( $\Delta G$ ) are determined from the electronic single-point energies plus TPSS-D3 thermal corrections and COSMO-RS solvation free energies. In our discussion, higher-level PW6B95-D3 Gibbs free energies (in kcal/mol, at 298.15 K and 1 mol/L concentration) will be used in our discussion unless specified otherwise. The applied DFT methods in combination with the large AO basis set provide usually accurate electronic energies leading to errors

for chemical energies (including barriers) on the order of typically 1-2 kcal/mol. This has been tested thoroughly for the huge data base GMTKN55<sup>[14]</sup> which is the common standard in the field of DFT benchmarking.

**Table S1.** TPSS-D3/def2-TZVP + COSMO computed imaginary frequency (ImF), zero-point energies (ZPE), gas-phase enthalpic (Hc) and Gibbs free-energy (Gc) corrections; the COSMO-RS computed solvation enthalpic (Hsol) and Gibbs free-energy (Gsol) corrections in CH<sub>2</sub>Cl<sub>2</sub> solution; TPSS-D3/def2-QZVP and PW6B95-D3/def2-QZVP single-point energies (TPSS-D3 and PW6B95-D3); the total PW6B95-D3 free energies G<sub>P</sub>; the relative electronic energies (ΔE<sub>T</sub> and ΔE<sub>P</sub>) and Gibbs energies (ΔG<sub>T</sub> and ΔG<sub>P</sub>) at the TPSS-D3 and PW6B95-D3 levels. (group Ph = C<sub>6</sub>H<sub>5</sub>; tBu = CMe<sub>3</sub>; To = *o*-C<sub>6</sub>H<sub>5</sub>CH<sub>3</sub>)

| Reactions<br>in CH <sub>2</sub> Cl <sub>2</sub>                                                                                                 | ImF<br>cm <sup>-1</sup> | ZPE<br>kcal<br>/mol | Hc<br>kcal<br>/mol | Gc<br>kcal<br>/mol | Hsol<br>kcal<br>/mol | Gsol<br>kcal<br>/mol | TPSS-D3<br>E <sub>h</sub> | PW6B95-D3<br>E <sub>h</sub> | G <sub>P</sub><br>E <sub>h</sub> | ΔE <sub>T</sub><br>kcal<br>/mol | ΔE <sub>P</sub><br>kcal<br>/mol | ΔG <sub>P</sub><br>kcal<br>/mol | ΔG <sub>T</sub><br>kcal<br>/mol |
|-------------------------------------------------------------------------------------------------------------------------------------------------|-------------------------|---------------------|--------------------|--------------------|----------------------|----------------------|---------------------------|-----------------------------|----------------------------------|---------------------------------|---------------------------------|---------------------------------|---------------------------------|
| <i>No stable OPEt<sub>3</sub> (Et = CH<sub>2</sub>CH<sub>3</sub>) adduct in CH<sub>2</sub>Cl<sub>2</sub> solution with cation 4<sup>+</sup></i> |                         |                     |                    |                    |                      |                      |                           |                             |                                  |                                 |                                 |                                 |                                 |
| 4 <sup>+</sup> + OPEt <sub>3</sub>                                                                                                              | 0                       | 228.66              | 256.26             | 171.21             | -75.96               | -62.22               | -2953.37100               | -2956.29980                 | -2956.12009                      | 0.00                            | 0.00                            | 0.00                            | 0.00                            |
| 4 <sup>+</sup> OPEt <sub>3</sub>                                                                                                                | 0                       | 229.92              | 257.73             | 186.60             | -58.14               | -51.45               | -2953.40144               | -2956.33433                 | -2956.11596                      | -19.10                          | -21.67                          | 2.59                            | 5.16                            |
| <i>Stable BCF (f = C<sub>6</sub>F<sub>5</sub>) adduct of OPEt<sub>3</sub></i>                                                                   |                         |                     |                    |                    |                      |                      |                           |                             |                                  |                                 |                                 |                                 |                                 |
| Bf <sub>3</sub> + OPEt <sub>3</sub>                                                                                                             | 0                       | 219.79              | 246.70             | 163.05             | -33.59               | -22.91               | -2864.19373               | -2867.03189                 | -2866.80254                      | 0.00                            | 0.00                            | 0.00                            | 0.00                            |
| Bf <sub>3</sub> _OPEt <sub>3</sub>                                                                                                              | 0                       | 221.10              | 248.16             | 179.22             | -24.11               | -19.70               | -2864.23879               | -2867.08293                 | -2866.82571                      | -28.27                          | -32.03                          | -14.53                          | -10.78                          |
| <i>Facile and exergonic Cl- abstraction from ICl with BCF</i>                                                                                   |                         |                     |                    |                    |                      |                      |                           |                             |                                  |                                 |                                 |                                 |                                 |
| 1Cl + Bf <sub>3</sub>                                                                                                                           | 0                       | 224.66              | 252.42             | 165.84             | -33.81               | -25.64               | -3248.42315               | -3251.64623                 | -3251.41679                      | 0.00                            | 0.00                            | 0.00                            | 0.00                            |
| TS0                                                                                                                                             | 52i                     | 223.83              | 252.22             | 179.10             | -29.41               | -23.34               | -3248.43601               | -3251.65931                 | -3251.40808                      | -8.07                           | -8.21                           | 5.46                            | 5.60                            |
| 1 <sup>+</sup> + ClBf <sub>3</sub> <sup>-</sup>                                                                                                 | 0                       | 224.25              | 252.00             | 165.98             | -99.36               | -88.69               | -3248.32857               | -3251.55715                 | -3251.42796                      | 59.35                           | 55.90                           | -7.01                           | -3.56                           |
| <i>Facile PPh<sub>3</sub> adduct formation of cation 1<sup>+</sup></i>                                                                          |                         |                     |                    |                    |                      |                      |                           |                             |                                  |                                 |                                 |                                 |                                 |
| 1 <sup>+</sup> + PPh <sub>3</sub>                                                                                                               | 0                       | 299.14              | 317.59             | 250.43             | -74.48               | -62.13               | -1615.12609               | -1616.79669                 | -1616.49060                      | 0.00                            | 0.00                            | 0.00                            | 0.00                            |
| 8 <sup>+</sup>                                                                                                                                  | 0                       | 300.11              | 318.94             | 265.45             | -58.71               | -49.66               | -1615.19647               | -1616.86421                 | -1616.51733                      | -44.17                          | -42.37                          | -16.77                          | -18.57                          |
| <i>For more delocalized cation 2<sup>+</sup> with 3 phenyl substituents</i>                                                                     |                         |                     |                    |                    |                      |                      |                           |                             |                                  |                                 |                                 |                                 |                                 |
| 2Cl + Bf <sub>3</sub>                                                                                                                           | 0                       | 273.70              | 304.72             | 211.54             | -38.38               | -29.39               | -3479.63263               | -3483.11243                 | -3482.81613                      | 0.00                            | 0.00                            | 0.00                            | 0.00                            |
| TS0a                                                                                                                                            | 39i                     | 273.64              | 305.13             | 226.42             | -32.94               | -26.32               | -3479.64735               | -3483.12867                 | -3482.80679                      | -9.23                           | -10.19                          | 5.86                            | 6.82                            |
| 2 <sup>+</sup> + ClBf <sub>3</sub> <sup>-</sup>                                                                                                 | 0                       | 274.19              | 305.18             | 212.93             | -100.05              | -88.40               | -3479.56096               | -3483.04462                 | -3482.84015                      | 44.97                           | 42.55                           | -15.07                          | -12.65                          |
| <i>FLP reaction of 2<sup>+</sup>/PtBu<sub>3</sub></i>                                                                                           |                         |                     |                    |                    |                      |                      |                           |                             |                                  |                                 |                                 |                                 |                                 |
| 2 <sup>+</sup> + HCCPhOMe                                                                                                                       | 0                       | 268.05              | 285.22             | 221.29             | -67.05               | -55.48               | -1232.73368               | -1234.08154                 | -1233.81127                      | 0.00                            | 0.00                            | 0.00                            | 0.00                            |
| TS1 <sup>+</sup>                                                                                                                                | 444i                    | 267.27              | 284.78             | 233.58             | -57.43               | -48.62               | -1232.73602               | -1234.07434                 | -1233.77658                      | -1.47                           | 4.52                            | 21.77                           | 15.78                           |
| A <sup>+</sup>                                                                                                                                  | 0                       | 270.53              | 287.25             | 238.15             | -60.13               | -50.87               | -1232.74672               | -1234.08646                 | -1233.78501                      | -8.18                           | -3.09                           | 16.48                           | 11.39                           |
| <i>..followed by facile deprotonation and P-C adduct formation</i>                                                                              |                         |                     |                    |                    |                      |                      |                           |                             |                                  |                                 |                                 |                                 |                                 |
| 2 <sup>+</sup> + HCCPhOMe + P(tBu) <sub>3</sub>                                                                                                 | 0                       | 495.56              | 524.74             | 423.56             | -80.19               | -63.74               | -2048.00223               | -2050.11247                 | -2049.53003                      | 0.00                            | 0.00                            | 0.00                            | 0.00                            |



|                                                                                                                               |      |        |        |        |         |         |             |             |             |        |        |        |        |
|-------------------------------------------------------------------------------------------------------------------------------|------|--------|--------|--------|---------|---------|-------------|-------------|-------------|--------|--------|--------|--------|
| <b>TS2<sup>+</sup></b>                                                                                                        | 14li | 494.21 | 524.00 | 449.80 | -61.77  | -51.16  | -2048.04837 | -2050.14498 | -2049.50670 | -28.96 | -20.40 | 14.64  | 6.08   |
| <b>11 + P(tBu)<sub>3</sub>H<sup>+</sup></b>                                                                                   | 0    | 496.70 | 525.91 | 438.23 | -83.43  | -69.10  | -2048.04059 | -2050.14921 | -2049.55495 | -24.07 | -23.05 | -15.64 | -16.66 |
| <b>TS3<sup>+</sup></b>                                                                                                        | 93i  | 496.96 | 526.20 | 452.83 | -61.46  | -51.36  | -2048.05265 | -2050.15095 | -2049.50814 | -31.64 | -24.14 | 13.74  | 6.24   |
| <b>10<sup>+</sup></b>                                                                                                         | 0    | 501.05 | 529.60 | 459.19 | -63.21  | -52.73  | -2048.11563 | -2050.22217 | -2049.57142 | -71.16 | -68.83 | -25.97 | -28.30 |
| <i>..less Lewis-basic PTo3 leads to higher deprotonation barrier</i>                                                          |      |        |        |        |         |         |             |             |             |        |        |        |        |
| <b>2<sup>+</sup> + HCCPhOMe + P(To)<sub>3</sub></b>                                                                           | 0    | 488.57 | 519.14 | 413.23 | -88.06  | -70.93  | -2387.59162 | -2390.09659 | -2389.54207 | 0.00   | 0.00   | 0.00   | 0.00   |
| <b>TS2+o</b>                                                                                                                  | 294i | 486.39 | 517.74 | 440.03 | -66.89  | -55.58  | -2387.63150 | -2390.12400 | -2389.50833 | -25.03 | -17.20 | 21.17  | 13.35  |
| <b>11 + P(To)<sub>3</sub>H<sup>+</sup></b>                                                                                    | 0    | 488.85 | 519.79 | 426.44 | -86.82  | -71.04  | -2387.61687 | -2390.12082 | -2389.54845 | -15.85 | -15.21 | -4.00  | -4.64  |
| <i>For cation 3<sup>+</sup> with 2 Pfs and one Ph, Cl- adduct is 1.6 kcal/mol more stable at C-Pf</i>                         |      |        |        |        |         |         |             |             |             |        |        |        |        |
| <b>3Cl + Bf<sub>3</sub></b>                                                                                                   | 0    | 222.54 | 259.35 | 154.50 | -34.09  | -26.69  | -4472.49818 | -4476.94755 | -4476.73785 | 0.00   | 0.00   | 0.00   | 0.00   |
| <b>3<sup>+</sup> + ClBf<sub>3</sub><sup>-</sup></b>                                                                           | 0    | 222.71 | 259.43 | 154.89 | -101.31 | -90.83  | -4472.40478 | -4476.85505 | -4476.74694 | 58.61  | 58.04  | -5.70  | -5.13  |
| <i>For cation 4<sup>+</sup> with 3 Pfs, Cl- transfer from ClBf<sub>3</sub><sup>-</sup> anion is 1.8 kcal/mol endergonic</i>   |      |        |        |        |         |         |             |             |             |        |        |        |        |
| <b>4Cl + Bf<sub>3</sub></b>                                                                                                   | 0    | 196.74 | 236.49 | 125.63 | -32.79  | -26.05  | -4968.92450 | -4973.85839 | -4973.69367 | 0.00   | 0.00   | 0.00   | 0.00   |
| <b>4<sup>+</sup> + ClBf<sub>3</sub><sup>-</sup></b>                                                                           | 0    | 196.78 | 236.47 | 126.56 | -102.05 | -92.15  | -4968.82428 | -4973.75735 | -4973.69648 | 62.89  | 63.41  | -1.76  | -2.28  |
| <i>Dication 5<sup>2+</sup> formation is also exergonic via two Cl- abstraction</i>                                            |      |        |        |        |         |         |             |             |             |        |        |        |        |
| <b>5Cl<sub>2</sub> + Bf<sub>3</sub></b>                                                                                       | 0    | 391.29 | 431.11 | 319.94 | -55.94  | -43.19  | -4517.24112 | -4521.69382 | -4521.24676 | 0.00   | 0.00   | 0.00   | 0.00   |
| <b>5Cl<sup>+</sup> + Bf<sub>3</sub>Cl<sup>-</sup></b>                                                                         | 0    | 391.66 | 431.40 | 320.11 | -112.52 | -97.13  | -4517.17766 | -4521.63382 | -4521.27245 | 39.82  | 37.65  | -16.12 | -13.94 |
| <b>5Cl<sup>+</sup> + Bf<sub>3</sub></b>                                                                                       | 0    | 391.74 | 430.42 | 321.50 | -80.23  | -66.27  | -4056.77566 | -4060.89287 | -4060.48012 | 0.00   | 0.00   | 0.00   | 0.00   |
| <b>Bf<sub>3</sub>Cl<sup>-</sup> + 5<sup>2+</sup></b>                                                                          | 0    | 393.07 | 431.45 | 323.10 | -187.73 | -170.60 | -4056.62142 | -4060.74272 | -4060.49366 | 96.79  | 94.23  | -8.50  | -5.94  |
| <i>Dication 6<sup>2+</sup> formation is also exergonic via two Cl- abstraction</i>                                            |      |        |        |        |         |         |             |             |             |        |        |        |        |
| <b>6Cl<sub>2</sub> + Bf<sub>3</sub></b>                                                                                       | 0    | 370.49 | 412.82 | 296.91 | -54.11  | -41.94  | -4914.38928 | -4919.23071 | -4918.81837 | 0.00   | 0.00   | 0.00   | 0.00   |
| <b>6Cl<sup>+</sup> + ClBf<sub>3</sub><sup>-</sup></b>                                                                         | 0    | 371.57 | 413.47 | 298.27 | -112.28 | -97.28  | -4914.31636 | -4919.16044 | -4918.83412 | 45.76  | 44.10  | -9.89  | -8.22  |
| <b>6Cl<sup>+</sup> + Bf<sub>3</sub></b>                                                                                       | 0    | 371.64 | 412.50 | 299.66 | -79.99  | -66.43  | -4453.91436 | -4458.41950 | -4458.04180 | 0.00   | 0.00   | 0.00   | 0.00   |
| <b>6<sup>2+</sup> + ClBf<sub>3</sub><sup>-</sup></b>                                                                          | 0    | 371.45 | 412.25 | 299.64 | -186.06 | -169.44 | -4453.75879 | -4458.26687 | -4458.05335 | 97.62  | 95.78  | -7.25  | -5.40  |
| <i>In contrast, dication 7<sup>2+</sup> formation is somewhat endergonic in solution, but could be favored in solid state</i> |      |        |        |        |         |         |             |             |             |        |        |        |        |
| <b>7Cl<sub>2</sub> + Bf<sub>3</sub></b>                                                                                       | 0    | 267.93 | 321.77 | 183.19 | -45.96  | -36.88  | -6900.11001 | -6906.89039 | -6906.65120 | 0.00   | 0.00   | 0.00   | 0.00   |
| <b>7Cl<sup>+</sup> + Bf<sub>3</sub>Cl<sup>-</sup></b>                                                                         | 0    | 268.18 | 321.81 | 183.40 | -112.19 | -99.88  | -6900.01134 | -6906.79016 | -6906.65103 | 61.91  | 62.89  | 0.11   | -0.87  |
| <b>7Cl<sup>+</sup> + Bf<sub>3</sub></b>                                                                                       | 0    | 268.25 | 320.84 | 184.79 | -79.90  | -69.02  | -6439.60934 | -6446.04922 | -6445.85870 | 0.00   | 0.00   | 0.00   | 0.00   |
| <b>Bf<sub>3</sub>Cl<sup>-</sup> + 7<sup>2+</sup></b>                                                                          | 0    | 268.82 | 321.16 | 185.35 | -190.85 | -176.63 | -6439.43202 | -6445.87102 | -6445.85110 | 111.27 | 111.82 | 4.77   | 4.22   |

*Reduction potentials*

|                       |   |        |        |        |         |         |             |             |             |         |         |         |         |
|-----------------------|---|--------|--------|--------|---------|---------|-------------|-------------|-------------|---------|---------|---------|---------|
| <b>Fc</b>             | 0 | 104.69 | 110.63 | 85.30  | -11.70  | -8.26   | -1651.22373 | -1652.26457 | -1652.13878 | 0.00    | 0.00    | 0.00    | 0.00    |
| <b>Fc<sup>+</sup></b> | 0 | 106.68 | 112.58 | 86.28  | -53.97  | -48.40  | -1650.98001 | -1652.02772 | -1651.96435 | 152.93  | 148.63  | 109.46  | 113.77  |
| <b>2+</b>             | 0 | 180.32 | 191.26 | 154.54 | -54.05  | -46.53  | -809.53663  | -810.42965  | -810.25452  | 0.00    | 0.00    | 0.00    | 0.00    |
| <b>2r</b>             | 0 | 183.55 | 193.12 | 158.39 | -23.01  | -17.08  | -809.70916  | -810.59977  | -810.37157  | -108.26 | -106.75 | -73.45  | -74.96  |
| <b>1+</b>             | 0 | 130.39 | 138.08 | 107.58 | -53.35  | -46.82  | -578.30425  | -578.94218  | -578.84234  | 0.00    | 0.00    | 0.00    | 0.00    |
| <b>1r</b>             | 0 | 131.33 | 138.46 | 108.88 | -17.51  | -12.65  | -578.48817  | -579.12302  | -578.96667  | -115.41 | -113.48 | -78.02  | -79.95  |
| <b>3+</b>             | 0 | 128.85 | 145.52 | 96.50  | -55.31  | -48.96  | -1802.38045 | -1804.24008 | -1804.16131 | 0.00    | 0.00    | 0.00    | 0.00    |
| <b>3r</b>             | 0 | 130.81 | 146.42 | 99.68  | -18.78  | -14.57  | -1802.57959 | -1804.43961 | -1804.30097 | -124.96 | -125.20 | -87.64  | -87.39  |
| <b>4+</b>             | 0 | 102.92 | 122.56 | 68.17  | -56.04  | -50.28  | -2298.79996 | -2301.14237 | -2301.11085 | 0.00    | 0.00    | 0.00    | 0.00    |
| <b>4r</b>             | 0 | 104.40 | 122.95 | 70.50  | -17.17  | -13.64  | -2299.00827 | -2301.35236 | -2301.25874 | -130.72 | -131.77 | -92.80  | -91.75  |
| <b>5++</b>            | 0 | 299.21 | 317.53 | 264.71 | -141.73 | -128.73 | -1386.59710 | -1388.12774 | -1387.90803 | 0.00    | 0.00    | 0.00    | 0.00    |
| <b>5+r</b>            | 0 | 305.92 | 322.13 | 274.37 | -60.79  | -50.26  | -1386.88166 | -1388.41153 | -1388.05138 | -178.57 | -178.08 | -89.95  | -90.44  |
| <b>5+r</b>            | 0 | 305.92 | 322.13 | 274.37 | -60.79  | -50.26  | -1386.88166 | -1388.41153 | -1388.05138 | 0.00    | 0.00    | 0.00    | 0.00    |
| <b>500</b>            | 0 | 296.75 | 315.02 | 262.65 | -39.49  | -30.01  | -1387.04964 | -1388.57859 | -1388.20484 | -105.41 | -104.83 | -96.30  | -96.88  |
| <b>6++</b>            | 0 | 277.58 | 298.34 | 241.24 | -140.06 | -127.57 | -1783.73446 | -1785.65190 | -1785.46773 | 0.00    | 0.00    | 0.00    | 0.00    |
| <b>6+r</b>            | 0 | 284.25 | 303.01 | 250.35 | -59.33  | -49.34  | -1784.03023 | -1785.94962 | -1785.62628 | -185.60 | -186.83 | -99.49  | -98.26  |
| <b>6+r</b>            | 0 | 284.25 | 303.01 | 250.35 | -59.33  | -49.34  | -1784.03023 | -1785.94962 | -1785.62628 | 0.00    | 0.00    | 0.00    | 0.00    |
| <b>600</b>            | 0 | 276.21 | 296.97 | 239.71 | -35.88  | -27.62  | -1784.21231 | -1786.13337 | -1785.79237 | -114.26 | -115.31 | -104.23 | -103.18 |
| <b>7++</b>            | 0 | 174.95 | 207.25 | 126.95 | -144.85 | -134.76 | -3769.40769 | -3773.25604 | -3773.26547 | 0.00    | 0.00    | 0.00    | 0.00    |
| <b>7+r</b>            | 0 | 177.59 | 208.36 | 132.66 | -60.37  | -52.76  | -3769.72523 | -3773.57804 | -3773.44770 | -199.26 | -202.06 | -114.35 | -111.55 |
| <b>7+r</b>            | 0 | 177.59 | 208.36 | 132.66 | -60.37  | -52.76  | -3769.72523 | -3773.57804 | -3773.44770 | 0.00    | 0.00    | 0.00    | 0.00    |
| <b>700</b>            | 0 | 172.03 | 204.87 | 123.89 | -29.65  | -23.97  | -3769.93141 | -3773.78871 | -3773.62647 | -129.38 | -132.20 | -112.18 | -109.36 |

**Table S2.** TPSS-D3/def2-TZVP + COSMO optimized Cartesian coordinates (in Å) in CH<sub>2</sub>Cl<sub>2</sub> solution. Each structure is labeled by a specific name (See Table S1), followed by the number of atoms, the total energy (in hartrees), and the detailed atomic coordinates (in double-column text list).

|                                                                                                  |   |            |            |           |
|--------------------------------------------------------------------------------------------------|---|------------|------------|-----------|
| <b>10<sup>+</sup></b> : alkyne FLP adduct of <b>2<sup>+</sup></b> / P( <i>t</i> Bu) <sub>3</sub> | C | 4.8337517  | -1.1494101 | 2.1713927 |
| 94                                                                                               | H | 4.8556912  | -3.2110694 | 1.5050224 |
| Energy = -2048.051242735                                                                         | H | 4.4813312  | 0.8646760  | 2.8417425 |
| C -1.1832792 -1.4282566 -0.3395474                                                               | O | 6.1395094  | -0.8358517 | 1.9362363 |
| C -1.5907427 -0.5255047 -1.3311299                                                               | C | 6.9764995  | -1.8716316 | 1.3886437 |
| C -1.7515961 -2.7085804 -0.3270645                                                               | H | 6.5883463  | -2.2054616 | 0.4206603 |
| C -0.1316265 -1.0401912 0.6633622                                                                | H | 7.9574864  | -1.4148672 | 1.2628027 |
| H -1.1521320 0.4686433 -1.3591357                                                                | H | 7.0429741  | -2.7194485 | 2.0793595 |
| C -2.5479573 -0.8889215 -2.2764172                                                               | P | 0.0895641  | -2.3814371 | 4.6245646 |
| H -1.4292955 -3.4341396 0.4150533                                                                | C | 1.5152907  | -2.2951481 | 5.8863177 |
| C -2.7106154 -3.0765208 -1.2720168                                                               | C | 1.8265753  | -0.8349845 | 6.2767439 |
| C 0.4189121 0.3882265 0.6528589                                                                  | C | 1.1434023  | -3.0759273 | 7.1684249 |
| C 1.1999367 -0.5279873 0.1424945                                                                 | C | 2.8509275  | -2.8861749 | 5.3644387 |
| C -3.1145787 -2.1663078 -2.2496521                                                               | H | 2.0773375  | -0.2254595 | 5.4071122 |
| H -2.8555672 -0.1730349 -3.0336459                                                               | H | 1.0251725  | -0.3554955 | 6.8382069 |
| H -3.1359514 -4.0760846 -1.2480636                                                               | H | 2.7103925  | -0.8662045 | 6.9238161 |
| C 0.0823344 1.7057675 1.0984980                                                                  | H | 1.1469255  | -4.1547764 | 7.0046262 |
| C 2.3568870 -0.9786328 -0.5710282                                                                | H | 1.9220113  | -2.8542909 | 7.9063950 |
| H -3.8602132 -2.4497284 -2.9868493                                                               | H | 0.1863684  | -2.7857252 | 7.6000162 |
| C -1.2276785 1.9953673 1.5256455                                                                 | H | 3.4643062  | -3.0767395 | 6.2524957 |
| C 1.0587096 2.7216216 1.1419523                                                                  | H | 2.7469867  | -3.8241909 | 4.8236777 |
| C 3.4490428 -0.1195889 -0.7936064                                                                | H | 3.3828792  | -2.1774239 | 4.7325504 |
| C 2.4137876 -2.3025314 -1.0429329                                                                | C | -0.5433873 | -4.1665703 | 4.4739768 |
| H -1.9814636 1.2142307 1.4875306                                                                 | C | 0.6536953  | -5.1316459 | 4.3584409 |
| C -1.5534169 3.2685589 1.9815969                                                                 | C | -1.4211425 | -4.5836902 | 5.6717541 |
| H 2.0729045 2.5021869 0.8230574                                                                  | C | -1.3640636 | -4.3489010 | 3.1814721 |
| C 0.7265028 3.9909106 1.6033726                                                                  | H | 1.3170143  | -4.8576525 | 3.5329042 |
| H 3.4118811 0.9009605 -0.4268366                                                                 | H | 1.2344445  | -5.2030070 | 5.2782326 |
| C 4.5772059 -0.5842508 -1.4611198                                                                | H | 0.2482114  | -6.1260579 | 4.1419645 |
| H 1.5683177 -2.9612638 -0.8686772                                                                | H | -2.3576645 | -4.0251277 | 5.7126442 |
| C 3.5412221 -2.7590919 -1.7164335                                                                | H | -1.6752493 | -5.6404099 | 5.5325117 |
| C -0.5783994 4.2692160 2.0236687                                                                 | H | -0.9119483 | -4.4886516 | 6.6300218 |
| H -2.5675475 3.4831198 2.3054702                                                                 | H | -1.7290984 | -5.3815938 | 3.1812609 |
| H 1.4854794 4.7670339 1.6378792                                                                  | H | -2.2325110 | -3.6923928 | 3.1162375 |
| H 5.4215788 0.0800905 -1.6192658                                                                 | H | -0.7391600 | -4.2137199 | 2.2970623 |
| C 4.6276602 -1.9034319 -1.9220107                                                                | C | -1.3114909 | -1.1943083 | 5.1515062 |
| H 3.5789399 -3.7825901 -2.0776378                                                                | C | -2.6528133 | -1.4978659 | 4.4472369 |
| H -0.8330114 5.2618299 2.3829823                                                                 | C | -1.5917140 | -1.2603345 | 6.6683165 |
| H 5.5102417 -2.2624892 -2.4434738                                                                | C | -0.9128927 | 0.2467275  | 4.7682605 |
| C -0.2723587 -1.6611935 2.0081961                                                                | H | -2.6120646 | -1.3709231 | 3.3645899 |
| C 0.6648722 -1.8423219 2.9689174                                                                 | H | -3.0440399 | -2.4887655 | 4.6791145 |
| H -1.3017747 -1.9169506 2.2362063                                                                | H | -3.3732030 | -0.7643523 | 4.8256884 |
| C 2.1082459 -1.5901487 2.7025275                                                                 | H | -0.7476122 | -0.9309032 | 7.2731580 |
| C 2.9115903 -2.6040062 2.1768187                                                                 | H | -2.4241736 | -0.5767308 | 6.8678052 |
| C 2.6915382 -0.3344243 2.9372379                                                                 | H | -1.8971342 | -2.2564000 | 6.9936556 |
| C 4.2668311 -2.4026675 1.9204126                                                                 | H | -1.7307600 | 0.9052241  | 5.0810400 |
| H 2.4746359 -3.5742020 1.9595671                                                                 | H | -0.0041050 | 0.5861494  | 5.2645403 |
| C 4.0341316 -0.1107274 2.6767813                                                                 | H | -0.7835599 | 0.3571955  | 3.6912230 |
| H 2.0753300 0.4842873 3.2970500                                                                  |   |            |            |           |

**11** : alkyne deprotonation product  
53

Energy = -1232.308989187

|   |            |            |            |
|---|------------|------------|------------|
| C | -2.2327695 | -1.5346829 | -1.7999371 |
| C | -2.6684351 | -1.5996002 | -3.1316901 |
| C | -2.8691484 | -2.3389338 | -0.8466595 |
| C | -1.1040131 | -0.6130962 | -1.4167883 |
| H | -2.1846125 | -0.9818324 | -3.8833829 |
| C | -3.7122768 | -2.4465411 | -3.4984957 |
| H | -2.5380411 | -2.2938028 | 0.1872212  |
| C | -3.9157387 | -3.1876066 | -1.2129103 |
| C | -0.9242831 | 0.6900317  | -2.1883807 |
| C | -0.0579360 | -0.2526432 | -2.4655626 |
| C | -4.3424340 | -3.2460472 | -2.5403825 |
| H | -4.0349413 | -2.4833125 | -4.5356817 |
| H | -4.3976102 | -3.8039147 | -0.4583232 |
| C | -1.5270785 | 1.9822084  | -2.3237883 |
| C | 1.0592512  | -0.8287649 | -3.1525118 |
| H | -5.1561838 | -3.9063425 | -2.8269613 |
| C | -2.6483334 | 2.3101778  | -1.5384448 |
| C | -1.0227881 | 2.9344368  | -3.2323310 |
| C | 1.7757381  | -0.1018735 | -4.1246626 |
| C | 1.4502470  | -2.1484576 | -2.8568853 |
| H | -3.0341788 | 1.5744913  | -0.8391093 |
| C | -3.2501011 | 3.5592437  | -1.6590116 |
| H | -0.1580654 | 2.6889177  | -3.8414494 |
| C | -1.6290660 | 4.1809049  | -3.3473151 |
| H | 1.4802252  | 0.9165705  | -4.3581751 |
| C | 2.8547031  | -0.6856149 | -4.7801521 |
| H | 0.8964319  | -2.7062504 | -2.1076479 |
| C | 2.5308721  | -2.7261692 | -3.5169296 |
| C | -2.7434289 | 4.4976615  | -2.5625925 |
| H | -4.1149457 | 3.8031697  | -1.0488324 |
| H | -1.2344732 | 4.9094808  | -4.0498113 |
| H | 3.4019003  | -0.1186734 | -5.5279101 |
| C | 3.2358689  | -1.9979818 | -4.4795318 |
| H | 2.8250319  | -3.7450385 | -3.2821187 |
| H | -3.2138550 | 5.4721814  | -2.6560585 |
| H | 4.0789882  | -2.4497918 | -4.9940106 |
| C | -0.6869713 | -0.6345769 | -0.0339069 |
| C | -0.3167309 | -0.6325216 | 1.1248279  |
| C | 0.1219516  | -0.6205794 | 2.4764919  |
| C | -0.4107379 | -1.5155937 | 3.4217908  |
| C | 1.1079779  | 0.2934034  | 2.9112172  |
| C | 0.0149858  | -1.5086849 | 4.7486605  |
| H | -1.1694190 | -2.2275419 | 3.1112593  |
| C | 1.5374605  | 0.3066250  | 4.2287888  |
| H | 1.5324742  | 0.9941378  | 2.1989298  |
| C | 0.9943166  | -0.5944350 | 5.1582005  |
| H | -0.4190210 | -2.2137548 | 5.4481107  |
| H | 2.2957586  | 1.0102721  | 4.5592738  |
| O | 1.4800582  | -0.5060985 | 6.4335123  |
| C | 0.9430233  | -1.4187902 | 7.4078674  |
| H | 1.1464751  | -2.4562503 | 7.1198827  |
| H | 1.4568958  | -1.1828115 | 8.3393473  |

H -0.1358302 -1.2682010 7.5262763

**1Cl**a : less stable with Cl at CPh  
27

Energy = -1038.750355091

|    |            |            |            |
|----|------------|------------|------------|
| H  | -0.2926905 | -3.0412724 | 0.7566766  |
| C  | -0.0719528 | -1.9848641 | 0.7824468  |
| C  | -0.5792966 | -0.6657612 | 1.1743337  |
| C  | 0.7079403  | -0.9590002 | 0.5220276  |
| C  | -1.7232184 | 0.0390852  | 0.5075285  |
| C  | 1.9029829  | -0.3502941 | 0.0006908  |
| C  | -1.7112852 | 0.1150138  | -0.8951595 |
| C  | -2.8036317 | 0.5947939  | 1.2009780  |
| C  | 2.0505208  | 1.0463991  | 0.0580845  |
| C  | 2.9231385  | -1.1349926 | -0.5675858 |
| H  | -0.8790954 | -0.3113374 | -1.4483361 |
| C  | -2.7537506 | 0.7313313  | -1.5837692 |
| H  | -2.8232862 | 0.5508570  | 2.2842340  |
| C  | -3.8505527 | 1.2072993  | 0.5089654  |
| H  | 1.2604929  | 1.6454837  | 0.5007282  |
| C  | 3.1999025  | 1.6483897  | -0.4467775 |
| H  | 2.8081317  | -2.2142113 | -0.6089586 |
| C  | 4.0683520  | -0.5268816 | -1.0714185 |
| C  | -3.8312525 | 1.2799838  | -0.8840416 |
| H  | -2.7217861 | 0.7847877  | -2.6684964 |
| H  | -4.6821616 | 1.6308130  | 1.0654027  |
| H  | 3.3104738  | 2.7276457  | -0.4003029 |
| C  | 4.2087224  | 0.8639451  | -1.0122653 |
| H  | 4.8546502  | -1.1341581 | -1.5100506 |
| H  | -4.6443845 | 1.7613058  | -1.4198477 |
| H  | 5.1048883  | 1.3346061  | -1.4060488 |
| Cl | -0.4801296 | -0.2521084 | 3.0097629  |

**1Cl** : adduct of **1**<sup>+</sup> and chloride  
27

Energy = -1038.764608546

|   |            |            |            |
|---|------------|------------|------------|
| H | 0.0617953  | -2.7081039 | -1.0447656 |
| C | 0.0554063  | -1.9885904 | -0.2315226 |
| C | -0.5858282 | -0.6798116 | -0.2239116 |
| C | 0.7446257  | -0.7050425 | -0.1910969 |
| C | -1.8551688 | -0.0110345 | -0.2263444 |
| C | 2.0370779  | -0.0849200 | -0.1302050 |
| C | -3.0382484 | -0.7742262 | -0.2414299 |
| C | -1.9432038 | 1.3947455  | -0.2129167 |
| C | 2.1777399  | 1.3165477  | -0.1115763 |
| C | 3.1896195  | -0.8925481 | -0.0872406 |
| H | -2.9682806 | -1.8578924 | -0.2450016 |
| C | -4.2793691 | -0.1445274 | -0.2441871 |
| H | -1.0353764 | 1.9897350  | -0.1996365 |
| C | -3.1865583 | 2.0176909  | -0.2201310 |
| H | 1.2936186  | 1.9456463  | -0.1428612 |
| C | 3.4427256  | 1.8917646  | -0.0567851 |
| H | 3.0787178  | -1.9728116 | -0.0949361 |
| C | 4.4523648  | -0.3104344 | -0.0281688 |
| C | -4.3568298 | 1.2510800  | -0.2353578 |

|    |            |            |            |
|----|------------|------------|------------|
| H  | -5.1875488 | -0.7399760 | -0.2533148 |
| H  | -3.2471118 | 3.1020315  | -0.2124104 |
| H  | 3.5439227  | 2.9730360  | -0.0453536 |
| C  | 4.5822553  | 1.0812101  | -0.0142262 |
| H  | 5.3365849  | -0.9399705 | 0.0069778  |
| H  | -5.3259532 | 1.7413641  | -0.2390705 |
| H  | 5.5682723  | 1.5342727  | 0.0312765  |
| Cl | -0.0035269 | -3.0423764 | 1.3429968  |

**1<sup>+</sup>P(*t*Bu)<sub>3</sub>** : adduct of **1<sup>+</sup>** and P(*t*Bu)<sub>3</sub>

66

Energy = -1393.615924584

|   |            |            |            |
|---|------------|------------|------------|
| H | -0.1389811 | -0.4012292 | -2.1555163 |
| C | -0.0442426 | 0.0829272  | -1.1783952 |
| C | -0.5709562 | 1.4901591  | -0.9948749 |
| C | 0.7333157  | 1.3759098  | -1.0663906 |
| C | -1.7497318 | 2.3089777  | -0.8935022 |
| C | 2.0338649  | 1.9877846  | -1.1104800 |
| C | -1.6895617 | 3.5387575  | -0.2084976 |
| C | -2.9681238 | 1.9137658  | -1.4761960 |
| C | 3.1370235  | 1.3348107  | -1.6902750 |
| C | 2.2123240  | 3.2777485  | -0.5701388 |
| H | -0.7607861 | 3.8470839  | 0.2595967  |
| C | -2.8198432 | 4.3429048  | -0.1051966 |
| H | -3.0235688 | 0.9792980  | -2.0231903 |
| C | -4.0922393 | 2.7280086  | -1.3795090 |
| H | 3.0071536  | 0.3536926  | -2.1301921 |
| C | 4.3832316  | 1.9535091  | -1.7244310 |
| H | 1.3699214  | 3.7908590  | -0.1186919 |
| C | 3.4615534  | 3.8873546  | -0.6010149 |
| C | -4.0240602 | 3.9415076  | -0.6903545 |
| H | -2.7626693 | 5.2835930  | 0.4341499  |
| H | -5.0235236 | 2.4161267  | -1.8425202 |
| H | 5.2249856  | 1.4416467  | -2.1810784 |
| C | 4.5517632  | 3.2272261  | -1.1759313 |
| H | 3.5870774  | 4.8778589  | -0.1742771 |
| H | -4.9045984 | 4.5716566  | -0.6096050 |
| H | 5.5267523  | 3.7045749  | -1.1975399 |
| P | -0.0959861 | -1.1948691 | 0.1485116  |
| C | 0.6070343  | -0.4991088 | 1.7571846  |
| C | 2.1433543  | -0.3763789 | 1.6773175  |
| C | 0.0714510  | 0.9230854  | 2.0613133  |
| C | 0.2496160  | -1.4198352 | 2.9440579  |
| H | 2.6450618  | -1.3437032 | 1.6304459  |
| H | 2.4647248  | 0.2406742  | 0.8353857  |
| H | 2.4693213  | 0.1212734  | 2.5975240  |
| H | -1.0071721 | 1.0260928  | 1.9565621  |
| H | 0.3295276  | 1.1372215  | 3.1043697  |
| H | 0.5561244  | 1.6718484  | 1.4353122  |
| H | 0.7818832  | -1.0348707 | 3.8208540  |
| H | -0.8169650 | -1.4027769 | 3.1735689  |
| H | 0.5624846  | -2.4536712 | 2.7913195  |
| C | 0.9507435  | -2.6217310 | -0.5148622 |
| C | 2.2327667  | -2.0576528 | -1.1624159 |
| C | 1.3325514  | -3.6380596 | 0.5789365  |

|   |            |            |            |
|---|------------|------------|------------|
| C | 0.2003776  | -3.3694821 | -1.6381820 |
| H | 1.9932291  | -1.4723413 | -2.0527409 |
| H | 2.8344802  | -1.4522471 | -0.4868808 |
| H | 2.8390594  | -2.9128426 | -1.4802658 |
| H | 0.4615783  | -4.0581506 | 1.0850358  |
| H | 1.8633643  | -4.4614144 | 0.0881915  |
| H | 2.0046020  | -3.2131975 | 1.3263616  |
| H | 0.9127737  | -4.0756350 | -2.0788797 |
| H | -0.6484835 | -3.9458934 | -1.2689906 |
| H | -0.1352765 | -2.6995692 | -2.4342824 |
| C | -1.9027984 | -1.7152171 | 0.3435566  |
| C | -2.6806502 | -0.6452029 | 1.1385415  |
| C | -2.5636168 | -1.8136946 | -1.0505714 |
| C | -2.0594193 | -3.0703433 | 1.0611611  |
| H | -2.3601864 | -0.5776615 | 2.1787799  |
| H | -2.6191860 | 0.3420567  | 0.6757508  |
| H | -3.7336900 | -0.9470559 | 1.1358117  |
| H | -2.2133532 | -2.6671821 | -1.6278656 |
| H | -3.6398312 | -1.9379868 | -0.8894761 |
| H | -2.4163665 | -0.9086997 | -1.6411616 |
| H | -3.1335685 | -3.2647378 | 1.1580132  |
| H | -1.6276734 | -3.8948086 | 0.4911618  |
| H | -1.6295328 | -3.0702731 | 2.0636215  |

**1<sub>r</sub>** : radical from SET reduction of **1<sup>+</sup>**

26

Energy = -578.4638621873

|   |            |            |            |
|---|------------|------------|------------|
| H | -0.8984565 | -1.5131274 | 0.0038169  |
| C | -0.3453359 | -0.5832648 | 0.0009128  |
| C | -0.3825247 | 0.7848420  | 0.0032287  |
| C | 0.8745897  | 0.0372434  | -0.0062451 |
| C | -1.1143104 | 1.9879557  | 0.0119522  |
| C | 2.2811054  | -0.0314700 | -0.0125411 |
| C | -2.5385802 | 1.9708832  | 0.0247725  |
| C | -0.4594206 | 3.2504878  | 0.0088331  |
| C | 3.0780065  | 1.1466697  | -0.0144575 |
| C | 2.9459648  | -1.2912063 | -0.0158232 |
| H | -3.0558151 | 1.0152272  | 0.0274845  |
| C | -3.2574406 | 3.1550670  | 0.0340856  |
| H | 0.6257391  | 3.2846653  | -0.0008734 |
| C | -1.1942060 | 4.4278569  | 0.0180801  |
| H | 2.5901046  | 2.1165619  | -0.0124919 |
| C | 4.4633121  | 1.0628565  | -0.0184654 |
| H | 2.3530368  | -2.2018625 | -0.0146642 |
| C | 4.3296694  | -1.3577438 | -0.0197285 |
| C | -2.5958242 | 4.3948222  | 0.0308683  |
| H | -4.3437641 | 3.1225186  | 0.0440652  |
| H | -0.6752428 | 5.3827244  | 0.0154033  |
| H | 5.0547501  | 1.9746351  | -0.0196752 |
| C | 5.1033054  | -0.1845966 | -0.0207804 |
| H | 4.8196039  | -2.3278956 | -0.0218726 |
| H | -3.1656745 | 5.3190727  | 0.0383319  |
| H | 6.1874929  | -0.2442191 | -0.0233401 |

**1<sup>+</sup>** : cyclopropenium cation

26

Energy = -578.3323276692

|   |            |            |            |
|---|------------|------------|------------|
| H | -0.9041095 | -1.5228173 | 0.0073247  |
| C | -0.3517482 | -0.5942269 | 0.0058571  |
| C | -0.3527541 | 0.7749656  | 0.0085570  |
| C | 0.8516980  | 0.0587465  | -0.0001030 |
| C | -1.0869179 | 1.9941648  | 0.0149026  |
| C | 2.2735278  | -0.0043482 | -0.0086944 |
| C | -2.4971036 | 1.9454051  | 0.0225648  |
| C | -0.4191554 | 3.2355147  | 0.0132545  |
| C | 3.0457578  | 1.1749069  | -0.0108476 |
| C | 2.9037159  | -1.2668012 | -0.0149234 |
| H | -3.0007821 | 0.9838818  | 0.0233870  |
| C | -3.2240993 | 3.1272392  | 0.0286861  |
| H | 0.6646769  | 3.2681602  | 0.0072019  |
| C | -1.1564891 | 4.4115156  | 0.0193030  |
| H | 2.5573243  | 2.1430127  | -0.0061820 |
| C | 4.4310383  | 1.0881995  | -0.0189942 |
| H | 2.2990933  | -2.1683019 | -0.0132021 |
| C | 4.2892188  | -1.3416564 | -0.0231936 |
| C | -2.5547441 | 4.3567325  | 0.0269889  |
| H | -4.3086504 | 3.0980495  | 0.0348199  |
| H | -0.6489017 | 5.3703357  | 0.0179839  |
| H | 5.0314312  | 1.9918245  | -0.0203935 |
| C | 5.0502028  | -0.1666774 | -0.0252488 |
| H | 4.7811634  | -2.3086520 | -0.0280492 |
| H | -3.1274387 | 5.2791801  | 0.0317633  |
| H | 6.1341305  | -0.2296501 | -0.0318863 |

**2Cl** : adduct of **2<sup>+</sup>** and chloride

37

Energy = -1269.962386000

|   |            |            |            |
|---|------------|------------|------------|
| C | -1.0024903 | -1.7353033 | 0.6061308  |
| C | -1.0639004 | -1.7927243 | -0.7970859 |
| C | -1.5733057 | -2.7762822 | 1.3449515  |
| C | -0.3158045 | -0.5491723 | 1.2155790  |
| H | -0.6251567 | -0.9918452 | -1.3854695 |
| C | -1.6800195 | -2.8633435 | -1.4395138 |
| H | -1.5351377 | -2.7463832 | 2.4279378  |
| C | -2.1907276 | -3.8498121 | 0.6984702  |
| C | -0.2879305 | 0.7879219  | 0.6058519  |
| C | 0.8544437  | 0.1161408  | 0.6246258  |
| C | -2.2477728 | -3.8998953 | -0.6938809 |
| H | -1.7166798 | -2.8870934 | -2.5252042 |
| H | -2.6281114 | -4.6485991 | 1.2912122  |
| C | -1.1209303 | 1.9074430  | 0.2744640  |
| C | 2.2449550  | -0.0736941 | 0.3292422  |
| H | -2.7288957 | -4.7353811 | -1.1943660 |
| C | -2.4898250 | 1.8687650  | 0.6004135  |
| C | -0.5977686 | 3.0432191  | -0.3735360 |
| C | 2.9987973  | 0.9237711  | -0.3191250 |
| C | 2.8680032  | -1.2829451 | 0.6914219  |
| H | -2.8891225 | 0.9928471  | 1.1027604  |
| C | -3.3163017 | 2.9421851  | 0.2827323  |
| H | 0.4577327  | 3.0797027  | -0.6250108 |

|    |            |            |            |
|----|------------|------------|------------|
| C  | -1.4298720 | 4.1121453  | -0.6888747 |
| H  | 2.5242745  | 1.8594625  | -0.5983308 |
| C  | 4.3442596  | 0.7103038  | -0.5993603 |
| H  | 2.2845746  | -2.0485022 | 1.1940537  |
| C  | 4.2148128  | -1.4892560 | 0.4089193  |
| C  | -2.7894477 | 4.0648066  | -0.3624521 |
| H  | -4.3714412 | 2.9057392  | 0.5371151  |
| H  | -1.0209668 | 4.9852052  | -1.1889370 |
| H  | 4.9204781  | 1.4828829  | -1.0999484 |
| C  | 4.9552359  | -0.4949452 | -0.2369852 |
| H  | 4.6892569  | -2.4243793 | 0.6913843  |
| H  | -3.4356032 | 4.9020154  | -0.6097488 |
| H  | 6.0064202  | -0.6571463 | -0.4567656 |
| Cl | -0.3675458 | -0.5837303 | 3.0990288  |

**2<sup>+</sup>PPh<sub>3</sub>** : adduct of **2<sup>+</sup>** and PPh<sub>3</sub>

70

Energy = -1846.360126204

|   |            |            |            |
|---|------------|------------|------------|
| C | -0.4526712 | 0.3087047  | -1.4042117 |
| C | -0.4729490 | 1.7065790  | -0.8214281 |
| C | 0.6693921  | 1.3212644  | -1.3444165 |
| C | -1.1317862 | 0.0002972  | -2.7126993 |
| C | -1.3083965 | 2.6207196  | -0.1016611 |
| C | 2.0562924  | 1.4632956  | -1.6703863 |
| C | -2.2067532 | 0.7928538  | -3.1351224 |
| C | -0.6956684 | -1.0424970 | -3.5372005 |
| C | -0.8485170 | 3.9127186  | 0.2206963  |
| C | -2.5842778 | 2.2182192  | 0.3323995  |
| C | 2.7653084  | 2.6264469  | -1.3071778 |
| C | 2.7343149  | 0.4221752  | -2.3325062 |
| C | -2.8450881 | 0.5340264  | -4.3472735 |
| H | -2.5422222 | 1.6177025  | -2.5124039 |
| C | -1.3353795 | -1.3064592 | -4.7481350 |
| H | 0.1584666  | -1.6432352 | -3.2434374 |
| H | 0.1329360  | 4.2327561  | -0.1141225 |
| C | -1.6507207 | 4.7734200  | 0.9606315  |
| H | -2.9366328 | 1.2200683  | 0.0914495  |
| C | -3.3793537 | 3.0809901  | 1.0781291  |
| H | 2.2492021  | 3.4332325  | -0.7965154 |
| C | 4.1205588  | 2.7350785  | -1.5971914 |
| H | 2.1895761  | -0.4746733 | -2.6083730 |
| C | 4.0892392  | 0.5387914  | -2.6199974 |
| C | -2.4162964 | -0.5224180 | -5.1537276 |
| H | -3.6788732 | 1.1558063  | -4.6597212 |
| H | -0.9828923 | -2.1180591 | -5.3778705 |
| C | -2.9154399 | 4.3608768  | 1.3931508  |
| H | -1.2907343 | 5.7683260  | 1.2045988  |
| H | -4.3604178 | 2.7591820  | 1.4139346  |
| H | 4.6620325  | 3.6319437  | -1.3121332 |
| C | 4.7857592  | 1.6935405  | -2.2527398 |
| H | 4.6052456  | -0.2697665 | -3.1286169 |
| H | -2.9155371 | -0.7271230 | -6.0960367 |
| H | -3.5372950 | 5.0360177  | 1.9731757  |
| H | 5.8445449  | 1.7827381  | -2.4761626 |
| H | 0.1428774  | -3.3425808 | -1.8877729 |

|   |            |            |            |   |            |            |            |
|---|------------|------------|------------|---|------------|------------|------------|
| C | 1.0671998  | -3.1214767 | -1.3642023 | H | -2.8987300 | 0.9228118  | -2.3922994 |
| C | 1.1090987  | -2.0993726 | -0.4000235 | C | -4.0903308 | 2.5537168  | -1.6523840 |
| C | 2.2090582  | -3.8703043 | -1.6343279 | H | 3.2105173  | 0.2085265  | -1.5378499 |
| P | -0.3485780 | -1.0616892 | -0.1573369 | C | 4.4142463  | 1.9673147  | -1.2964880 |
| C | 2.2940792  | -1.8647696 | 0.3107523  | H | 1.0931263  | 3.8451452  | -0.6065563 |
| C | 3.3959013  | -3.6123217 | -0.9439865 | C | 3.2294013  | 4.0101866  | -0.7752748 |
| H | 2.1693403  | -4.6592846 | -2.3785382 | C | -0.0816384 | -1.1324286 | -5.5462019 |
| C | -0.2830308 | -0.2711310 | 1.4606547  | H | 1.9380415  | -0.3735712 | -5.5470668 |
| C | -1.7888002 | -2.1322614 | -0.2154626 | H | -2.1117669 | -1.7749513 | -5.2080708 |
| C | 3.4326311  | -2.6186923 | 0.0345053  | C | -4.1250153 | 3.6839984  | -0.8312656 |
| H | 2.3308039  | -1.1081885 | 1.0853923  | H | -3.0136279 | 4.9286251  | 0.5367503  |
| H | 4.2853492  | -4.1966100 | -1.1582879 | H | -4.9658789 | 2.2733865  | -2.2300596 |
| C | 0.7198716  | 0.6637028  | 1.7773777  | H | 5.3427682  | 1.4393858  | -1.4890519 |
| C | -1.3043609 | -0.5328960 | 2.3865859  | C | 4.4295550  | 3.3369647  | -1.0224079 |
| C | -1.7002005 | -3.4237305 | 0.3304094  | H | 3.2351188  | 5.0752277  | -0.5643759 |
| C | -3.0133203 | -1.6631989 | -0.7129579 | H | -0.0862671 | -1.3763991 | -6.6042065 |
| H | 4.3461816  | -2.4308687 | 0.5894609  | H | -5.0314256 | 4.2776192  | -0.7617548 |
| C | 0.6904751  | 1.3262946  | 3.0003704  | H | 5.3711036  | 3.8771107  | -1.0016782 |
| H | 1.5077322  | 0.8938973  | 1.0694862  | H | -2.9330370 | -0.8316933 | -1.1559004 |
| C | -1.3237561 | 0.1357911  | 3.6085023  | C | -2.8324909 | -1.7783518 | -0.6236662 |
| H | -2.0858870 | -1.2480232 | 2.1524028  | C | -1.9278291 | -1.6181752 | 0.6095852  |
| C | -2.8298673 | -4.2368492 | 0.3683791  | H | -2.5021000 | -2.5600953 | -1.3066603 |
| H | -0.7567328 | -3.7881831 | 0.7240058  | H | -3.8275598 | -2.0530660 | -0.2576548 |
| C | -4.1373060 | -2.4843579 | -0.6726523 | P | -0.1177191 | -1.2711749 | 0.1134041  |
| H | -3.0864062 | -0.6743813 | -1.1502493 | C | -2.5225970 | -0.4398812 | 1.4107324  |
| C | -0.3322958 | 1.0676954  | 3.9146740  | C | -2.0625181 | -2.9095093 | 1.4462701  |
| H | 1.4650526  | 2.0492475  | 3.2358854  | C | 0.7682234  | -0.5314221 | 1.6382561  |
| H | -2.1178849 | -0.0702755 | 4.3184115  | C | 0.7536046  | -2.8663932 | -0.4342591 |
| C | -4.0464372 | -3.7691657 | -0.1339651 | H | -2.0629687 | -0.3027437 | 2.3883670  |
| H | -2.7592735 | -5.2344396 | 0.7898604  | H | -2.4772539 | 0.4990617  | 0.8546268  |
| H | -5.0816303 | -2.1223098 | -1.0661916 | H | -3.5804571 | -0.6745358 | 1.5736393  |
| H | -0.3548736 | 1.5920537  | 4.8649546  | H | -3.1122826 | -2.9755134 | 1.7533813  |
| H | -4.9240066 | -4.4077421 | -0.1072486 | H | -1.8370770 | -3.8026386 | 0.8617372  |
|   |            |            |            | H | -1.4536104 | -2.9131096 | 2.3485781  |
|   |            |            |            | C | 2.3003160  | -0.5686541 | 1.4790644  |
|   |            |            |            | C | 0.3875006  | 0.9469259  | 1.9193304  |
|   |            |            |            | C | 0.4280986  | -1.3474414 | 2.9084882  |
|   |            |            |            | C | 2.0596131  | -2.5104647 | -1.1771838 |
|   |            |            |            | C | 1.1134056  | -3.8006829 | 0.7396435  |
|   |            |            |            | C | -0.1346093 | -3.6617673 | -1.4154436 |
|   |            |            |            | H | 2.7034225  | -1.5817623 | 1.4985038  |
|   |            |            |            | H | 2.6389760  | -0.0591338 | 0.5783687  |
|   |            |            |            | H | 2.7190043  | -0.0312147 | 2.3373424  |
|   |            |            |            | H | -0.6663371 | 1.1768259  | 1.7758639  |
|   |            |            |            | H | 0.6317500  | 1.1362890  | 2.9704587  |
|   |            |            |            | H | 0.9778037  | 1.6324755  | 1.3133890  |
|   |            |            |            | H | 1.0789061  | -0.9629445 | 3.7014721  |
|   |            |            |            | H | -0.6013711 | -1.2083784 | 3.2372379  |
|   |            |            |            | H | 0.6293174  | -2.4128975 | 2.8051355  |
|   |            |            |            | H | 1.8684973  | -1.9439982 | -2.0883198 |
|   |            |            |            | H | 2.7678482  | -1.9666520 | -0.5534586 |
|   |            |            |            | H | 2.5304857  | -3.4564241 | -1.4668165 |
|   |            |            |            | H | 0.2481165  | -4.0974514 | 1.3325717  |
|   |            |            |            | H | 1.5408220  | -4.7080528 | 0.2982810  |
|   |            |            |            | H | 1.8691956  | -3.3725724 | 1.3992026  |

$2^+P(tBu)_3$  : adduct of  $2^+$  and  $P(tBu)_3$

76

Energy = -1624.796562184

|   |            |            |            |
|---|------------|------------|------------|
| C | -0.0336377 | -0.0344592 | -1.3339292 |
| C | -0.5845418 | 1.3578820  | -1.0690813 |
| C | 0.7227791  | 1.2627799  | -1.0819709 |
| C | -0.0689135 | -0.5092543 | -2.7844302 |
| C | -1.7872516 | 2.1443085  | -1.0034119 |
| C | 1.9946108  | 1.9365473  | -1.0712112 |
| C | 1.0507015  | -0.2641385 | -3.5948290 |
| C | -1.2047589 | -1.0468928 | -3.4034261 |
| C | -1.8264116 | 3.2941862  | -0.1909530 |
| C | -2.9339742 | 1.7849965  | -1.7350511 |
| C | 3.2097571  | 1.2719981  | -1.3217245 |
| C | 2.0231254  | 3.3194887  | -0.7970446 |
| C | 1.0507507  | -0.5737998 | -4.9535514 |
| H | 1.9350293  | 0.1885832  | -3.1640137 |
| C | -1.2122799 | -1.3592899 | -4.7634133 |
| H | -2.1034321 | -1.2286051 | -2.8338328 |
| H | -0.9511616 | 3.5714527  | 0.3876925  |
| C | -2.9903903 | 4.0514203  | -0.1027102 |

H 0.4639384 -4.5084747 -1.7695299  
H -1.0268432 -4.0680503 -0.9371210  
H -0.4263034 -3.0728409 -2.2858804

**2r** : radical from SET reduction of 2<sup>+</sup>

36

Energy = -809.6736523691

C -1.1354242 -1.9066633 0.0015893  
C -2.5364818 -1.9025354 -0.1320516  
C -0.4634150 -3.1363331 0.1322159  
C -0.3977745 -0.6678711 0.0043788  
H -3.0611067 -0.9599830 -0.2426668  
C -3.2455841 -3.0990941 -0.1371620  
H 0.6150830 -3.1476827 0.2442697  
C -1.1765451 -4.3306123 0.1322397  
C -0.4204821 0.7114638 0.0026549  
C 0.8282749 -0.0297904 0.0088999  
C -2.5677313 -4.3144923 -0.0036885  
H -4.3259837 -3.0866090 -0.2437761  
H -0.6501528 -5.2744184 0.2368036  
C -1.1170027 1.9368556 -0.0002632  
C 2.2362448 -0.0568145 0.0101784  
H -3.1230352 -5.2478364 -0.0057217  
C -2.5398236 1.9891635 0.0543385  
C -0.4143853 3.1741269 -0.0592387  
C 2.9898450 1.1511066 0.0678175  
C 2.9619578 -1.2826080 -0.0461024  
H -3.1048878 1.0647363 0.1121011  
C -3.2080657 3.2028159 0.0478938  
H 0.6694356 3.1642800 -0.1089534  
C -1.0964322 4.3819504 -0.0665767  
H 2.4648105 2.0992838 0.1187944  
C 4.3765057 1.1275291 0.0712467  
H 2.4191091 -2.2203217 -0.1030866  
C 4.3472553 -1.2907561 -0.0431442  
C -2.4973701 4.4125547 -0.0138925  
H -4.2938787 3.2146724 0.0928753  
H -0.5356006 5.3116696 -0.1141845  
H 4.9261451 2.0640033 0.1181474  
C 5.0721364 -0.0891156 0.0158231  
H 4.8753704 -2.2396148 -0.0882168  
H -3.0270614 5.3602935 -0.0205490  
H 6.1577772 -0.1024386 0.0178664

**2<sup>+</sup>** : cation

36

Energy = -809.5464204786

C -1.1401946 -1.9166888 0.0003988  
C -2.5504067 -1.9046777 -0.0094220  
C -0.4568778 -3.1503446 0.0092095  
C -0.4096478 -0.6890180 0.0012052  
H -3.0835684 -0.9615529 -0.0158381  
C -3.2567529 -3.0996653 -0.0105328  
H 0.6263526 -3.1688636 0.0166491  
C -1.1700505 -4.3412867 0.0080378

C -0.3914319 0.6981494 -0.0033231  
C 0.8007959 -0.0111803 0.0070554  
C -2.5684936 -4.3172763 -0.0018266  
H -4.3416691 -3.0864745 -0.0181210  
H -0.6408234 -5.2884653 0.0147043  
C -1.0892774 1.9446773 -0.0121601  
C 2.2292866 -0.0298860 0.0167519  
H -3.1237049 -5.2502907 -0.0027344  
C -2.4993244 1.9700366 -0.0214990  
C -0.3734840 3.1598381 -0.0115774  
C 2.9559246 1.1788565 0.0176341  
C 2.9241045 -1.2571606 0.0256860  
H -3.0573342 1.0413580 -0.0223412  
C -3.1737154 3.1833023 -0.0299408  
H 0.7098386 3.1496502 -0.0043356  
C -1.0548161 4.3692362 -0.0200352  
H 2.4303397 2.1261565 0.0104905  
C 4.3438425 1.1567698 0.0273126  
H 2.3739801 -2.1904915 0.0252620  
C 4.3121265 -1.2712577 0.0354062  
C -2.4533991 4.3822692 -0.0292138  
H -4.2586035 3.1988622 -0.0371082  
H -0.5006361 5.3020674 -0.0194947  
H 4.8995033 2.0887184 0.0278787  
C 5.0223340 -0.0662904 0.0362220  
H 4.8432499 -2.2173703 0.0424414  
H -2.9836632 5.3296534 -0.0358482  
H 6.1079225 -0.0804457 0.0438662

**3Cla** : higher 3Cl

37

Energy = -2262.776645230

F 3.0700199 1.7158879 -0.2278699  
C 3.1263179 0.3920245 -0.0159816  
C 4.3523475 -0.1720358 0.3091131  
C 1.9543508 -0.3789656 -0.1124186  
F 5.4502433 0.5920127 0.4111720  
C 4.4396018 -1.5449852 0.5329785  
C 0.7081837 0.2176735 -0.4820790  
C 2.0829739 -1.7620980 0.1074881  
F 5.6167791 -2.0983925 0.8426417  
C 3.3016069 -2.3440456 0.4263038  
C -0.6085270 0.2075848 -0.6048395  
C 0.1024649 1.3681058 -1.1798633  
F 1.0141879 -2.5608516 -0.0339275  
F 3.3970752 -3.6683758 0.6202579  
C -1.9093450 -0.3191666 -0.3296582  
C -0.0100762 2.7414750 -0.5897595  
C -3.0306877 0.0949894 -1.0696756  
C -2.1396485 -1.2233187 0.7221972  
C 0.1701116 2.8774998 0.7952564  
C -0.3333643 3.8724040 -1.3452036  
F -2.8783790 0.9684361 -2.0766254  
C -4.3054551 -0.3855171 -0.8011296  
F -1.1192855 -1.6035724 1.5071442



|    |            |            |            |
|----|------------|------------|------------|
| C  | -3.4078500 | -1.7071122 | 1.0104345  |
| H  | 0.4159831  | 2.0054610  | 1.3950613  |
| C  | 0.0362372  | 4.1203191  | 1.4091327  |
| C  | -0.4720798 | 5.1164274  | -0.7275957 |
| H  | -0.4730040 | 3.7797713  | -2.4164898 |
| C  | -4.4943029 | -1.2914127 | 0.2411643  |
| F  | -5.3541400 | 0.0145669  | -1.5357681 |
| F  | -3.5993128 | -2.5596115 | 2.0287399  |
| H  | 0.1866126  | 4.2080768  | 2.4814037  |
| C  | -0.2869541 | 5.2466687  | 0.6490511  |
| H  | -0.7239522 | 5.9857200  | -1.3284614 |
| F  | -5.7191642 | -1.7554749 | 0.5099467  |
| H  | -0.3913425 | 6.2167117  | 1.1264421  |
| Cl | 0.3150796  | 1.3788703  | -3.0159026 |

**3Cl** : adduct of **3<sup>+</sup>** and chloride

37

Energy = -2262.779150885

|    |            |            |            |
|----|------------|------------|------------|
| F  | 3.2692018  | 0.9011266  | -1.5085405 |
| C  | 2.9908259  | -0.0872364 | -0.6352764 |
| C  | 4.0679491  | -0.7380634 | -0.0457981 |
| C  | 1.6611027  | -0.4232710 | -0.3548561 |
| F  | 5.3276317  | -0.3805674 | -0.3462592 |
| C  | 3.8370778  | -1.7625670 | 0.8682208  |
| C  | 0.5142691  | 0.3052840  | -0.9834151 |
| C  | 1.4697374  | -1.4572340 | 0.5662837  |
| F  | 4.8667961  | -2.3940209 | 1.4485095  |
| C  | 2.5299565  | -2.1216243 | 1.1766743  |
| C  | -0.8234853 | 0.4514726  | -0.4087851 |
| C  | -0.0858558 | 1.5535185  | -0.4780109 |
| F  | 0.2253703  | -1.8479133 | 0.9090027  |
| F  | 2.2953069  | -3.1071953 | 2.0591688  |
| C  | -2.0488841 | -0.2362773 | -0.1307238 |
| C  | 0.1210357  | 2.9674007  | -0.3460516 |
| C  | -3.0255192 | 0.3021551  | 0.7230473  |
| C  | -2.3278629 | -1.4954167 | -0.6910591 |
| C  | -0.9123447 | 3.8118385  | 0.1070637  |
| C  | 1.3668030  | 3.5256697  | -0.6907491 |
| F  | -2.8025958 | 1.4838004  | 1.3262506  |
| C  | -4.2147175 | -0.3573308 | 0.9982636  |
| F  | -1.4408757 | -2.0729449 | -1.5154754 |
| C  | -3.5145671 | -2.1687022 | -0.4327700 |
| H  | -1.8786835 | 3.3903758  | 0.3567841  |
| C  | -0.6935314 | 5.1795793  | 0.2226354  |
| C  | 1.5766984  | 4.8957926  | -0.5728528 |
| H  | 2.1569300  | 2.8792216  | -1.0544849 |
| C  | -4.4625595 | -1.5986092 | 0.4147007  |
| F  | -5.1205438 | 0.1847483  | 1.8270386  |
| F  | -3.7556369 | -3.3630853 | -0.9952243 |
| H  | -1.4938955 | 5.8252694  | 0.5712105  |
| C  | 0.5500102  | 5.7247829  | -0.1135828 |
| H  | 2.5400080  | 5.3191540  | -0.8405555 |
| F  | -5.6067355 | -2.2426748 | 0.6712356  |
| H  | 0.7153687  | 6.7942472  | -0.0227806 |
| Cl | 0.6095207  | 0.1050476  | -2.8461590 |

**3r** : radical from SET reduction of **3<sup>+</sup>**

36

Energy = -1802.495648801

|   |            |            |            |
|---|------------|------------|------------|
| F | 3.0792178  | 1.6059339  | 0.8378173  |
| C | 3.1472055  | 0.3438796  | 0.3631635  |
| C | 4.3796436  | -0.2811154 | 0.3356175  |
| C | 1.9495470  | -0.3045856 | -0.0358461 |
| F | 5.4836105  | 0.3660704  | 0.7548846  |
| C | 4.4810457  | -1.6045400 | -0.1029776 |
| C | 0.7009407  | 0.3407021  | 0.0005428  |
| C | 2.1019539  | -1.6426318 | -0.4860018 |
| F | 5.6754976  | -2.2197008 | -0.1308301 |
| C | 3.3300884  | -2.2794284 | -0.5168880 |
| C | -0.7426803 | 0.2928168  | 0.0204839  |
| C | -0.0599946 | 1.4920180  | 0.0185188  |
| F | 1.0316472  | -2.3004235 | -0.9722549 |
| F | 3.4319925  | -3.5399678 | -0.9790735 |
| C | -1.9457966 | -0.4344076 | 0.0483238  |
| C | -0.1087757 | 2.9299943  | 0.0297259  |
| C | -3.1834159 | 0.1359076  | -0.3477119 |
| C | -2.0086809 | -1.7835450 | 0.4862314  |
| C | -1.2909916 | 3.5937517  | 0.4080890  |
| C | 1.0250545  | 3.6792591  | -0.3367603 |
| F | -3.1995779 | 1.4034033  | -0.8124012 |
| C | -4.3711891 | -0.5706144 | -0.3278709 |
| F | -0.8971197 | -2.3717554 | 0.9690798  |
| C | -3.1913583 | -2.5016258 | 0.5093796  |
| H | -2.1615159 | 3.0156049  | 0.6949657  |
| C | -1.3313152 | 4.9834596  | 0.4274873  |
| C | 0.9707655  | 5.0686291  | -0.3309924 |
| H | 1.9325829  | 3.1669899  | -0.6338833 |
| C | -4.3843571 | -1.9015064 | 0.0993374  |
| F | -5.5155414 | 0.0044915  | -0.7438398 |
| F | -3.2090140 | -3.7700606 | 0.9607648  |
| H | -2.2403929 | 5.4936944  | 0.7303682  |
| C | -0.2038661 | 5.7215102  | 0.0547372  |
| H | 1.8428916  | 5.6448504  | -0.6240268 |
| F | -5.5354760 | -2.5946351 | 0.1205220  |
| H | -0.2407154 | 6.8068952  | 0.0647496  |

**3<sup>+</sup>** : cation

36

Energy = -1802.347854171

|   |            |            |            |
|---|------------|------------|------------|
| F | 3.0539657  | 1.5024752  | 0.9722334  |
| C | 3.0935765  | 0.2817228  | 0.4265751  |
| C | 4.3025888  | -0.3939318 | 0.3848919  |
| C | 1.9050904  | -0.3055711 | -0.0482616 |
| F | 5.4158002  | 0.1649854  | 0.8658329  |
| C | 4.3484423  | -1.6794544 | -0.1601997 |
| C | 0.6645519  | 0.3891890  | -0.0015606 |
| C | 1.9869703  | -1.6030377 | -0.5930289 |
| F | 5.5049973  | -2.3305290 | -0.2112069 |
| C | 3.1913939  | -2.2852056 | -0.6571193 |
| C | -0.7118423 | 0.3438695  | 0.0223033  |

|   |            |            |            |
|---|------------|------------|------------|
| C | -0.0630883 | 1.5722635  | 0.0183211  |
| F | 0.8962083  | -2.1694799 | -1.1189185 |
| F | 3.2591601  | -3.5034497 | -1.1998376 |
| C | -1.9040996 | -0.4311247 | 0.0617598  |
| C | -0.1090000 | 2.9919011  | 0.0276886  |
| C | -3.1305797 | 0.0848838  | -0.3991146 |
| C | -1.8994158 | -1.7390344 | 0.5874988  |
| C | -1.3302223 | 3.6551676  | 0.2783211  |
| C | 1.0670425  | 3.7354896  | -0.2135988 |
| F | -3.1729683 | 1.3135959  | -0.9264866 |
| C | -4.2934908 | -0.6675483 | -0.3615822 |
| F | -0.7721267 | -2.2417504 | 1.1008013  |
| C | -3.0570254 | -2.4983239 | 0.6465951  |
| H | -2.2271253 | 3.0792086  | 0.4728381  |
| C | -1.3660745 | 5.0415190  | 0.2929556  |
| C | 1.0138826  | 5.1213619  | -0.2095342 |
| H | 1.9989790  | 3.2209002  | -0.4152571 |
| C | -4.2535393 | -1.9611996 | 0.1645023  |
| F | -5.4429949 | -0.1739031 | -0.8282595 |
| F | -3.0430622 | -3.7260714 | 1.1716802  |
| H | -2.2988030 | 5.5575013  | 0.4944799  |
| C | -0.1982650 | 5.7726450  | 0.0465449  |
| H | 1.9113936  | 5.6988279  | -0.4041065 |
| F | -5.3653715 | -2.6863205 | 0.2114280  |
| H | -0.2330384 | 6.8577463  | 0.0542526  |

**4Cl** : adduct of **4<sup>+</sup>** and chloride

37

Energy = -2759.181507321

|   |            |            |            |
|---|------------|------------|------------|
| F | 2.0983172  | -2.8704886 | -1.0059119 |
| C | 2.6203785  | -1.9047030 | -0.2282186 |
| C | 2.0307372  | -0.6346247 | -0.1955070 |
| C | 3.7371962  | -2.2275109 | 0.5342856  |
| C | 0.8044013  | -0.3300180 | -0.9994196 |
| C | 2.5993377  | 0.2895041  | 0.6864618  |
| F | 4.2748339  | -3.4562832 | 0.4668952  |
| C | 4.2901717  | -1.2742613 | 1.3850938  |
| C | -0.5546569 | -0.5342637 | -0.4511467 |
| C | -0.1812548 | 0.7135417  | -0.6827043 |
| F | 2.0624752  | 1.5174248  | 0.8326094  |
| C | 3.7129167  | -0.0116435 | 1.4660006  |
| F | 5.3617685  | -1.5758708 | 2.1301188  |
| C | -1.4732446 | -1.5204748 | 0.0424347  |
| C | -0.4627629 | 2.1063408  | -0.8338761 |
| F | 4.2282303  | 0.9092792  | 2.2969983  |
| C | -2.2633932 | -1.2819677 | 1.1800142  |
| C | -1.5792368 | -2.7880171 | -0.5532338 |
| C | 0.4943539  | 2.9946726  | -1.3597541 |
| C | -1.7298111 | 2.6397614  | -0.5355915 |
| F | -2.1562839 | -0.1151122 | 1.8346613  |
| C | -3.1219038 | -2.2463010 | 1.6911590  |
| F | -0.8562856 | -3.0698963 | -1.6470950 |
| C | -2.4402678 | -3.7604256 | -0.0609520 |
| F | 1.7054939  | 2.5464153  | -1.7185819 |
| C | 0.2170791  | 4.3423417  | -1.5452397 |

|    |            |            |            |
|----|------------|------------|------------|
| F  | -2.7001065 | 1.8309928  | -0.0858951 |
| C  | -2.0226026 | 3.9836888  | -0.7131276 |
| F  | -3.8495835 | -1.9966854 | 2.7900169  |
| C  | -3.2150238 | -3.4883362 | 1.0651406  |
| F  | -2.5357811 | -4.9537956 | -0.6654584 |
| F  | 1.1484671  | 5.1665502  | -2.0462125 |
| C  | -1.0427153 | 4.8395048  | -1.2158332 |
| F  | -3.2390916 | 4.4636184  | -0.4170107 |
| F  | -4.0429809 | -4.4201097 | 1.5489504  |
| F  | -1.3163733 | 6.1347817  | -1.3935245 |
| Cl | 1.1023111  | -0.6335095 | -2.7941633 |

**4<sup>+</sup>OPEt<sub>3</sub>** : unstable adduct of **4<sup>+</sup>** and OPEt<sub>3</sub>  
59

Energy = -2953.310551070

|   |            |            |            |
|---|------------|------------|------------|
| F | -2.4642959 | 0.9393179  | -1.7331834 |
| C | -1.4076860 | 1.7017577  | -2.0762730 |
| C | -0.2343993 | 1.6628297  | -1.3200950 |
| C | -1.5409059 | 2.5130753  | -3.1997182 |
| C | -0.0789509 | 0.7703272  | -0.1291846 |
| C | 0.8072012  | 2.4941760  | -1.7423503 |
| F | -2.6844133 | 2.5187114  | -3.8980096 |
| C | -0.4822148 | 3.3269474  | -3.5904088 |
| C | -0.9124986 | -0.3890120 | 0.1989949  |
| C | 0.3345082  | -0.6464990 | -0.1640439 |
| F | 1.9734802  | 2.5118294  | -1.0599608 |
| C | 0.7009445  | 3.3198839  | -2.8538842 |
| F | -0.5981599 | 4.1123079  | -4.6653051 |
| C | -2.2118170 | -0.8114931 | 0.6207368  |
| C | 1.3878801  | -1.5907892 | -0.4094260 |
| F | 1.7267108  | 4.0993542  | -3.2241413 |
| C | -2.6590906 | -2.1289819 | 0.4224919  |
| C | -3.1040832 | 0.0894599  | 1.2266124  |
| C | 1.4594413  | -2.8020715 | 0.3009139  |
| C | 2.4025290  | -1.3365774 | -1.3455082 |
| F | -1.8670867 | -3.0092373 | -0.2052037 |
| C | -3.9243601 | -2.5366869 | 0.8208224  |
| F | -2.7238642 | 1.3607699  | 1.4304715  |
| C | -4.3696123 | -0.3017180 | 1.6393167  |
| F | 0.5510778  | -3.0699090 | 1.2514890  |
| C | 2.4804855  | -3.7178153 | 0.0848863  |
| F | 2.3763984  | -0.1968242 | -2.0539086 |
| C | 3.4291576  | -2.2410732 | -1.5801236 |
| F | -4.3348622 | -3.7928020 | 0.6110745  |
| C | -4.7791030 | -1.6203345 | 1.4356588  |
| F | -5.1967100 | 0.5708797  | 2.2276574  |
| F | 2.5307221  | -4.8584103 | 0.7820416  |
| C | 3.4655099  | -3.4376937 | -0.8632385 |
| F | 4.3704311  | -1.9807486 | -2.4938131 |
| F | -5.9947645 | -2.0045446 | 1.8240404  |
| F | 4.4432601  | -4.3157223 | -1.0843307 |
| P | 1.4497763  | 1.6778350  | 2.0846241  |
| O | 0.2823330  | 1.6612294  | 1.0118011  |
| C | 2.8845903  | 0.6978555  | 1.5910705  |
| C | 4.0579668  | 0.8449592  | 2.5783391  |

|   |            |            |           |
|---|------------|------------|-----------|
| H | 3.1693556  | 1.0225257  | 0.5854380 |
| H | 2.5663320  | -0.3467205 | 1.5295434 |
| H | 4.8846197  | 0.2177367  | 2.2363768 |
| H | 4.4141235  | 1.8764563  | 2.6262818 |
| H | 3.7813107  | 0.5198586  | 3.5846750 |
| C | 1.9097340  | 3.4124578  | 2.2484786 |
| C | 0.7048482  | 4.3437810  | 2.4637213 |
| H | 2.4568637  | 3.6758290  | 1.3364285 |
| H | 2.6138289  | 3.4763000  | 3.0858316 |
| H | 1.0631576  | 5.3737030  | 2.5293977 |
| H | 0.0004882  | 4.2736929  | 1.6315827 |
| H | 0.1765300  | 4.1090161  | 3.3915287 |
| C | 0.7984819  | 1.0640465  | 3.6507754 |
| C | 0.4195420  | -0.4233923 | 3.6342359 |
| H | -0.0686596 | 1.6905620  | 3.8883139 |
| H | 1.5600450  | 1.2718909  | 4.4117833 |
| H | 0.0031781  | -0.6985234 | 4.6056995 |
| H | -0.3342280 | -0.6355835 | 2.8718061 |
| H | 1.2887309  | -1.0603953 | 3.4499800 |

**4r** : radical from SET reduction of **4<sup>+</sup>**

36

Energy = -2298.899996459

|   |            |            |            |
|---|------------|------------|------------|
| F | 1.4958064  | -2.7445378 | -0.8824048 |
| C | 2.4983204  | -1.9566791 | -0.4441098 |
| C | 2.1967999  | -0.6342881 | -0.0229763 |
| C | 3.7895106  | -2.4469229 | -0.4807048 |
| C | 0.8731438  | -0.1702588 | 0.0111792  |
| C | 3.3067212  | 0.1605714  | 0.3617050  |
| F | 4.0355746  | -3.6965478 | -0.9140811 |
| C | 4.8554743  | -1.6290659 | -0.0923084 |
| C | -0.4692202 | -0.4592316 | -0.0009861 |
| C | -0.1394473 | 0.8751751  | 0.0091231  |
| F | 3.0963815  | 1.4034914  | 0.8315358  |
| C | 4.6039100  | -0.3208540 | 0.3284486  |
| F | 6.1119410  | -2.1004778 | -0.1191720 |
| C | -1.4988286 | -1.4627357 | -0.0141850 |
| C | -0.5593208 | 2.2124382  | 0.0530619  |
| F | 5.6279396  | 0.4543508  | 0.7282963  |
| C | -2.6949466 | -1.2690407 | -0.7223892 |
| C | -1.3416840 | -2.6722704 | 0.6802762  |
| C | 0.2806677  | 3.2997514  | -0.3005414 |
| C | -1.8788892 | 2.5543734  | 0.4526579  |
| F | -2.8708230 | -0.1503501 | -1.4396980 |
| C | -3.6892672 | -2.2377925 | -0.7477333 |
| F | -0.2369273 | -2.8825720 | 1.4099115  |
| C | -2.3322216 | -3.6450812 | 0.6788802  |
| F | 1.5250071  | 3.0523186  | -0.7487205 |
| C | -0.1562752 | 4.6121932  | -0.2584972 |
| F | -2.7095691 | 1.5737847  | 0.8610738  |
| C | -2.3247518 | 3.8612011  | 0.4977521  |
| F | -4.8129916 | -2.0461613 | -1.4517891 |
| C | -3.5065856 | -3.4264264 | -0.0411900 |
| F | -2.1750481 | -4.7822572 | 1.3697317  |
| F | 0.6616051  | 5.6140331  | -0.6290509 |

|   |            |            |            |
|---|------------|------------|------------|
| C | -1.4631805 | 4.9034632  | 0.1404310  |
| F | -3.5736274 | 4.1449805  | 0.9101771  |
| F | -4.4607605 | -4.3598168 | -0.0542032 |
| F | -1.8917321 | 6.1751828  | 0.1760264  |

**4<sup>+</sup>** : cation

36

Energy = -2298.745448937

|   |            |            |            |
|---|------------|------------|------------|
| F | 1.6267227  | -2.6656861 | -1.0583308 |
| C | 2.5363588  | -1.8583958 | -0.5068329 |
| C | 2.1352716  | -0.6110839 | 0.0151009  |
| C | 3.8680244  | -2.2392629 | -0.5175664 |
| C | 0.7712741  | -0.2228327 | 0.0110972  |
| C | 3.1315654  | 0.2390266  | 0.5382872  |
| F | 4.2413888  | -3.4084530 | -1.0407977 |
| C | 4.8301967  | -1.3756597 | 0.0144865  |
| C | -0.5704777 | -0.5606920 | -0.0001042 |
| C | -0.1924787 | 0.7702942  | 0.0112315  |
| F | 2.7814987  | 1.4029259  | 1.0915373  |
| C | 4.4648731  | -0.1359577 | 0.5478237  |
| F | 6.1064902  | -1.7373309 | 0.0135567  |
| C | -1.5872382 | -1.5493270 | -0.0143487 |
| C | -0.5381741 | 2.1456323  | 0.0181726  |
| F | 5.3968055  | 0.6628296  | 1.0709096  |
| C | -2.8657166 | -1.2698299 | -0.5399502 |
| C | -1.3488916 | -2.8424977 | 0.4954176  |
| C | 0.3506635  | 3.1202551  | -0.4808978 |
| C | -1.7804209 | 2.5800241  | 0.5252458  |
| F | -3.1097169 | -0.0729081 | -1.0795021 |
| C | -3.8591683 | -2.2346971 | -0.5664229 |
| F | -0.1678154 | -3.1246291 | 1.0511059  |
| C | -2.3383253 | -3.8117178 | 0.4897589  |
| F | 1.5117459  | 2.7396256  | -1.0197419 |
| C | 0.0174525  | 4.4646197  | -0.4819781 |
| F | -2.6241419 | 1.6903564  | 1.0541974  |
| C | -2.1199841 | 3.9227505  | 0.5442198  |
| F | -5.0561039 | -1.9704557 | -1.0933743 |
| C | -3.5925239 | -3.5048307 | -0.0464958 |
| F | -2.1127641 | -5.0232397 | 1.0011532  |
| F | 0.8527344  | 5.3763972  | -0.9830342 |
| C | -1.2186510 | 4.8628925  | 0.0358721  |
| F | -3.2852046 | 4.3271007  | 1.0530783  |
| F | -4.5420057 | -4.4310257 | -0.0620156 |
| F | -1.5405575 | 6.1497235  | 0.0446680  |

**500** : SET reduction of **5r<sup>+</sup>**

60

Energy = -1386.990154384

|   |            |            |            |
|---|------------|------------|------------|
| H | 0.3682698  | -2.4236909 | -0.4314210 |
| C | 0.2118746  | -1.3643276 | -0.2488185 |
| C | 1.2427868  | -0.6122655 | 0.2196877  |
| C | -1.1025342 | -0.8042160 | -0.5023072 |
| H | 2.2036773  | -1.0847001 | 0.4027952  |
| C | 1.1026863  | 0.8045593  | 0.5000749  |
| C | -1.2425484 | 0.6126591  | -0.2220753 |

C -2.1405477 -1.5615384 -0.9742183  
 C 2.1405204 1.5617224 0.9726086  
 C -0.2116343 1.3647537 0.2463787  
 H -2.2034790 1.0850472 -0.4050522  
 C -2.6925058 -2.8024730 -1.4282690  
 C -3.5017659 -1.7168210 -1.3910411  
 C 2.6922063 2.8023267 1.4278944  
 C 3.5015878 1.7168269 1.3899505  
 H -0.3679923 2.4241629 0.4287937  
 C -2.5025485 -4.1947007 -1.7086878  
 C -4.7881783 -1.1249248 -1.6096716  
 C 2.5023704 4.1943727 1.7092677  
 C 4.7879940 1.1250279 1.6089044  
 C -1.2188414 -4.7707920 -1.6008929  
 C -3.5833004 -5.0181240 -2.0935185  
 C -5.8413784 -1.8590040 -2.1979201  
 C -5.0237707 0.2160614 -1.2386620  
 C 1.2181703 4.7700002 1.6051101  
 C 3.5839348 5.0180144 2.0913277  
 C 5.8389908 1.8574206 2.2031494  
 C 5.0256818 -0.2140271 1.2323605  
 H -0.3798075 -4.1475767 -1.3111056  
 C -1.0239955 -6.1206346 -1.8738210  
 H -4.5789222 -4.5948000 -2.1696742  
 C -3.3831927 -6.3666593 -2.3597797  
 H -5.6745426 -2.8871267 -2.5001599  
 C -7.0821847 -1.2701342 -2.4053498  
 H -4.2242840 0.7887168 -0.7812291  
 C -6.2699832 0.7984491 -1.4442304  
 H 0.3786058 4.1465058 1.3174483  
 C 1.0235968 6.1196651 1.8791450  
 H 4.5799453 4.5949670 2.1641184  
 C 3.3840942 6.3664003 2.3585441  
 H 5.6700995 2.8838121 2.5101601  
 C 7.0798280 1.2687506 2.4109764  
 H 4.2277953 -0.7852564 0.7703624  
 C 6.2720245 -0.7960923 1.4381002  
 H -0.0295468 -6.5491126 -1.7897293  
 C -2.1032235 -6.9241628 -2.2530594  
 H -4.2244889 -6.9886051 -2.6513001  
 H -7.8818127 -1.8458752 -2.8621973  
 C -7.3033635 0.0600707 -2.0282843  
 H -6.4372238 1.8306036 -1.1504990  
 H 0.0287933 6.5478648 1.7979028  
 C 2.1035857 6.9234161 2.2557501  
 H 4.2260022 6.9886304 2.6476839  
 H 7.8777165 1.8430247 2.8726870  
 C 7.3032362 -0.0594330 2.0281347  
 H 6.4410641 -1.8266674 1.1398920  
 H -1.9500191 -7.9784980 -2.4635475  
 H -8.2752508 0.5167980 -2.1902126  
 H 1.9505472 7.9775725 2.4672515  
 H 8.2751815 -0.5159619 2.1902749

5Cl<sub>2a</sub> : higher 5Cl<sub>2</sub>

62  
 Energy = -2307.533625073  
 H 1.2523192 -2.0057421 0.7566870  
 C 0.6984113 -1.1326290 0.4262810  
 C -0.6687374 -1.2079831 0.2221334  
 C 1.3892655 0.0781691 0.2098596  
 H -1.1911041 -2.1441057 0.3905123  
 C -1.3882724 -0.0723812 -0.2036310  
 C 0.6697748 1.2137450 -0.2160741  
 C 2.8030884 0.1273732 0.4256604  
 C -2.8021043 -0.1215109 -0.4195759  
 C -0.6974206 1.1384698 -0.4199099  
 H 1.1922380 2.1498144 -0.3844061  
 C 3.9591742 -0.6804700 0.8295351  
 C 3.9804584 0.7411953 0.4515793  
 C -3.9587283 0.6861086 -0.8214659  
 C -3.9785545 -0.7371553 -0.4502313  
 H -1.2513431 2.0116289 -0.7501789  
 C 4.5618189 -1.7801442 0.0088817  
 C 4.8569337 1.8600261 0.2747416  
 C -4.5647840 1.7818620 0.0016938  
 C -4.8529894 -1.8588839 -0.2820623  
 C 4.1002374 -1.9464404 -1.3054587  
 C 5.5928673 -2.6045155 0.4723089  
 C 6.2326098 1.7039163 0.5328291  
 C 4.3721062 3.1111091 -0.1548663  
 C -4.0897875 1.9609670 1.3093252  
 C -5.6130192 2.5891944 -0.4533245  
 C -6.2279791 -1.7049585 -0.5451538  
 C -4.3668364 -3.1108357 0.1435021  
 H 3.3017019 -1.3100584 -1.6772088  
 C 4.6572828 -2.9161929 -2.1370552  
 H 5.9512038 -2.4918656 1.4899661  
 C 6.1532026 -3.5721827 -0.3627945  
 H 6.6021302 0.7390692 0.8666540  
 C 7.1026479 2.7761131 0.3632437  
 H 3.3124463 3.2377952 -0.3536949  
 C 5.2479822 4.1776968 -0.3236943  
 H -3.2779836 1.3375696 1.6743079  
 C -4.6505048 2.9269230 2.1430660  
 H -5.9816458 2.4665065 -1.4661905  
 C -6.1769752 3.5528413 0.3838003  
 H -6.5985697 -0.7394101 -0.8757660  
 C -7.0959765 -2.7802109 -0.3847115  
 H -3.3077886 -3.2356518 0.3466872  
 C -5.2406871 -4.1804729 0.3032649  
 H 4.2820898 -3.0347296 -3.1497470  
 C 5.6884944 -3.7335418 -1.6690093  
 H 6.9545061 -4.2029414 0.0121403  
 H 8.1622466 2.6497882 0.5643742  
 C 6.6133031 4.0134786 -0.0655203  
 H 4.8693983 5.1398018 -0.6557801  
 H -4.2648700 3.0558662 3.1505481  
 C -5.6987380 3.7271777 1.6835769  
 H -6.9916822 4.1703516 0.0157732

|    |            |            |            |
|----|------------|------------|------------|
| H  | -8.1550273 | -2.6555763 | -0.5897447 |
| C  | -6.6052864 | -4.0184671 | 0.0399263  |
| H  | -4.8611196 | -5.1432414 | 0.6322850  |
| H  | 6.1226059  | -4.4910075 | -2.3153422 |
| H  | 7.2936832  | 4.8496063  | -0.1977427 |
| H  | -6.1357548 | 4.4816468  | 2.3314550  |
| H  | -7.2840690 | -4.8569918 | 0.1649816  |
| Cl | 4.1046950  | -1.0369989 | 2.6775675  |
| Cl | -4.1025842 | 1.0514846  | -2.6688078 |

**5Cl<sub>2</sub>** : adduct of **5<sup>2+</sup>** and two chloride anions  
62

Energy = -2307.533390953

|   |            |            |            |
|---|------------|------------|------------|
| H | -1.5086432 | -1.9588258 | 0.2168853  |
| C | -0.8414367 | -1.1012640 | 0.2211522  |
| C | -1.3800206 | 0.1820974  | 0.2254539  |
| C | 0.5454114  | -1.3042206 | 0.2211894  |
| H | -2.4565590 | 0.3132786  | 0.2407470  |
| C | -0.5452493 | 1.3042096  | 0.2212844  |
| C | 1.3801795  | -0.1821106 | 0.2258991  |
| C | 1.0507192  | -2.7118100 | 0.1577933  |
| C | -1.0505793 | 2.7117810  | 0.1577921  |
| C | 0.8415934  | 1.1012573  | 0.2217397  |
| H | 2.4567129  | -0.3132933 | 0.2414666  |
| C | 0.2177972  | -3.9098007 | 0.3011306  |
| C | 0.7115524  | -3.6666573 | -0.9062395 |
| C | -0.7113943 | 3.6665640  | -0.9062872 |
| C | -0.2177623 | 3.9098358  | 0.3011115  |
| H | 1.5087994  | 1.9588223  | 0.2180064  |
| C | -0.5537486 | -4.6650448 | 1.2460462  |
| C | 0.8937960  | -3.9268516 | -2.3042559 |
| C | -0.8936383 | 3.9266464  | -2.3043207 |
| C | 0.5535869  | 4.6652776  | 1.2460340  |
| C | -0.6398319 | -4.2198938 | 2.5788760  |
| C | -1.2287194 | -5.8415780 | 0.8670453  |
| C | 0.3114913  | -5.0498380 | -2.9235030 |
| C | 1.6673775  | -3.0380381 | -3.0745957 |
| C | -1.6670230 | 3.0376224  | -3.0746188 |
| C | -0.3115203 | 5.0496970  | -2.9236181 |
| C | 1.2285806  | 5.8417762  | 0.8669524  |
| C | 0.6394844  | 4.2203565  | 2.5789520  |
| H | -0.1157239 | -3.3141328 | 2.8686581  |
| C | -1.3860204 | -4.9356182 | 3.5099943  |
| H | -1.1641831 | -6.1912260 | -0.1587262 |
| C | -1.9744484 | -6.5509278 | 1.8025252  |
| H | -0.2846739 | -5.7396025 | -2.3340898 |
| C | 0.4998503  | -5.2728594 | -4.2832876 |
| H | 2.1156976  | -2.1741777 | -2.5933575 |
| C | 1.8526190  | -3.2681316 | -4.4341846 |
| H | -2.1153031 | 2.1737862  | -2.5932996 |
| C | -1.8521882 | 3.2675231  | -4.4342463 |
| H | 0.2842338  | 5.7397646  | -2.3341609 |
| C | -0.4997852 | 5.2725105  | -4.2834516 |
| H | 1.1641926  | 6.1912776  | -0.1588883 |
| C | 1.9742488  | 6.5512408  | 1.8023935  |

|    |            |            |            |
|----|------------|------------|------------|
| H  | 0.1152837  | 3.3146807  | 2.8688315  |
| C  | 1.3855819  | 4.9362141  | 3.5100423  |
| H  | -1.4476397 | -4.5865825 | 4.5364974  |
| C  | -2.0553647 | -6.1008066 | 3.1246426  |
| H  | -2.4934385 | -7.4570680 | 1.5040765  |
| H  | 0.0482587  | -6.1402772 | -4.7556758 |
| C  | 1.2698654  | -4.3841754 | -5.0412675 |
| H  | 2.4509350  | -2.5789712 | -5.0227668 |
| H  | -2.4502698 | 2.5781505  | -5.0228132 |
| C  | -1.2696287 | 4.3836342  | -5.0413864 |
| H  | -0.0482124 | 6.1398904  | -4.7559295 |
| H  | 2.4934569  | 7.4572106  | 1.5038085  |
| C  | 2.0549365  | 6.1013676  | 3.1246068  |
| H  | 1.4471806  | 4.5872687  | 4.5365774  |
| H  | -2.6381152 | -6.6581540 | 3.8522042  |
| H  | 1.4153338  | -4.5626924 | -6.1026977 |
| H  | -1.4151439 | 4.5620843  | -6.1028223 |
| H  | 2.6374717  | 6.6589083  | 3.8521922  |
| Cl | 2.8086079  | -2.8438372 | 0.8518049  |
| Cl | -2.8085714 | 2.8437329  | 0.8516274  |

**5Cl<sup>+</sup>** : adduct of **5<sup>2+</sup>** and one chloride

61

Energy = -1847.119400370

|   |            |            |            |
|---|------------|------------|------------|
| H | -1.1249477 | -1.8151734 | -0.0822728 |
| C | -0.7665851 | -0.8363477 | -0.3831669 |
| C | 0.2702948  | -0.2453869 | 0.3132298  |
| C | -1.3632533 | -0.1841624 | -1.4819414 |
| H | 0.7112785  | -0.7608962 | 1.1586760  |
| C | 0.7415040  | 1.0320728  | -0.0591570 |
| C | -0.8902102 | 1.0829220  | -1.8557585 |
| C | -2.4782654 | -0.8894606 | -2.1780625 |
| C | 1.8059227  | 1.6487699  | 0.6576443  |
| C | 0.1411152  | 1.6861185  | -1.1527468 |
| H | -1.3368204 | 1.5929816  | -2.7003595 |
| C | -2.5975463 | -2.3607662 | -2.2276414 |
| C | -3.4697528 | -1.7233285 | -1.4667082 |
| C | 2.6147566  | 2.7508866  | 0.8979370  |
| C | 2.7949920  | 1.5888866  | 1.6295626  |
| H | 0.4974541  | 2.6624708  | -1.4607241 |
| C | -1.9897360 | -3.5198651 | -2.8123308 |
| C | -4.5725450 | -1.6265365 | -0.5563456 |
| C | 2.9870081  | 4.0981651  | 0.6035878  |
| C | 3.4883250  | 0.8600389  | 2.6438467  |
| C | -0.8767102 | -3.3655922 | -3.6598653 |
| C | -2.4866460 | -4.8111453 | -2.5485913 |
| C | -5.2609955 | -2.7771479 | -0.1249812 |
| C | -4.9720411 | -0.3623160 | -0.0839198 |
| C | 2.2050535  | 4.8725431  | -0.2776780 |
| C | 4.1380886  | 4.6602389  | 1.1926923  |
| C | 4.4272787  | 1.5123405  | 3.4688910  |
| C | 3.2366874  | -0.5152914 | 2.8250149  |
| H | -0.5005104 | -2.3680705 | -3.8663590 |
| C | -0.2724565 | -4.4816189 | -4.2299888 |
| H | -3.3468133 | -4.9344047 | -1.8978961 |

|    |            |            |            |
|----|------------|------------|------------|
| C  | -1.8759541 | -5.9215504 | -3.1208882 |
| H  | -4.9586966 | -3.7538271 | -0.4898840 |
| C  | -6.3237108 | -2.6592177 | 0.7639552  |
| H  | -4.4431892 | 0.5232116  | -0.4236335 |
| C  | -6.0376459 | -0.2526857 | 0.8038311  |
| H  | 1.3127459  | 4.4474303  | -0.7227193 |
| C  | 2.5667550  | 6.1836588  | -0.5566513 |
| H  | 4.7490131  | 4.0632310  | 1.8601971  |
| C  | 4.4988619  | 5.9685027  | 0.8998094  |
| H  | 4.6131985  | 2.5726200  | 3.3410271  |
| C  | 5.0945977  | 0.8013229  | 4.4571853  |
| H  | 2.5248111  | -1.0226046 | 2.1839767  |
| C  | 3.9166288  | -1.2214419 | 3.8082417  |
| H  | 0.5847509  | -4.3569212 | -4.8846920 |
| C  | -0.7693002 | -5.7602423 | -3.9614514 |
| H  | -2.2620614 | -6.9153352 | -2.9149945 |
| H  | -6.8516369 | -3.5486892 | 1.0944250  |
| C  | -6.7142417 | -1.3991984 | 1.2299240  |
| H  | -6.3430592 | 0.7251988  | 1.1635948  |
| H  | 1.9602733  | 6.7810530  | -1.2294488 |
| C  | 3.7132801  | 6.7307462  | 0.0287715  |
| H  | 5.3887185  | 6.3979820  | 1.3481916  |
| H  | 5.8117145  | 1.3058291  | 5.0963991  |
| C  | 4.8423689  | -0.5642711 | 4.6254011  |
| H  | 3.7276632  | -2.2815299 | 3.9419866  |
| H  | -0.2970958 | -6.6303752 | -4.4077517 |
| H  | -7.5462489 | -1.3121308 | 1.9223628  |
| H  | 3.9957608  | 7.7549780  | -0.1946797 |
| H  | 5.3692331  | -1.1183881 | 5.3962027  |
| Cl | -3.0977950 | 0.0418577  | -3.6698848 |

5<sup>+</sup>r : radical cation

60

Energy = -1386.854435686

|   |            |            |            |
|---|------------|------------|------------|
| H | 0.3397466  | -2.4334351 | -0.3778388 |
| C | 0.1954488  | -1.3707507 | -0.2186816 |
| C | 1.2347903  | -0.6124852 | 0.2540445  |
| C | -1.0809464 | -0.7885424 | -0.4921220 |
| H | 2.1877685  | -1.0850440 | 0.4638844  |
| C | 1.0805486  | 0.7885191  | 0.4911840  |
| C | -1.2349811 | 0.6125661  | -0.2552725 |
| C | -2.1420651 | -1.5628021 | -0.9751359 |
| C | 2.1417180  | 1.5627756  | 0.9739819  |
| C | -0.1959038 | 1.3707337  | 0.2181977  |
| H | -2.1876747 | 1.0853438  | -0.4657067 |
| C | -2.6648607 | -2.7922713 | -1.4175675 |
| C | -3.4826528 | -1.6931531 | -1.3831152 |
| C | 2.6638333  | 2.7915055  | 1.4191206  |
| C | 3.4831387  | 1.6938115  | 1.3788327  |
| H | -0.3402875 | 2.4333512  | 0.3780220  |
| C | -2.4713880 | -4.1831844 | -1.6937861 |
| C | -4.7653398 | -1.0972296 | -1.6021488 |
| C | 2.4694144  | 4.1811738  | 1.7007972  |
| C | 4.7671621  | 1.0992401  | 1.5935928  |
| C | -1.1862153 | -4.7549381 | -1.5962017 |

|   |            |            |            |
|---|------------|------------|------------|
| C | -3.5607543 | -4.9991310 | -2.0641426 |
| C | -5.8045407 | -1.8341255 | -2.2076711 |
| C | -5.0042688 | 0.2372644  | -1.2147191 |
| C | 1.1814521  | 4.7491470  | 1.6198197  |
| C | 3.5608141  | 4.9992105  | 2.0603413  |
| C | 5.8029013  | 1.8327999  | 2.2089631  |
| C | 5.0104722  | -0.2303301 | 1.1923368  |
| H | -0.3414170 | -4.1340993 | -1.3200911 |
| C | -0.9978073 | -6.1048313 | -1.8666661 |
| H | -4.5550098 | -4.5721704 | -2.1306241 |
| C | -3.3663453 | -6.3489476 | -2.3265313 |
| H | -5.6277181 | -2.8568814 | -2.5206231 |
| C | -7.0458917 | -1.2486171 | -2.4193158 |
| H | -4.2143378 | 0.8088375  | -0.7406976 |
| C | -6.2507569 | 0.8147132  | -1.4236160 |
| H | 0.3354111  | 4.1262214  | 1.3522085  |
| C | 0.9922095  | 6.0976320  | 1.8967514  |
| H | 4.5571463  | 4.5749772  | 2.1125648  |
| C | 3.3654891  | 6.3477531  | 2.3286067  |
| H | 5.6216631  | 2.8511206  | 2.5337747  |
| C | 7.0455552  | 1.2486090  | 2.4166654  |
| H | 4.2228281  | -0.7989306 | 0.7109172  |
| C | 6.2584707  | -0.8061246 | 1.3968503  |
| H | -0.0046964 | -6.5368265 | -1.7936413 |
| C | -2.0857376 | -6.9041537 | -2.2305321 |
| H | -4.2102521 | -6.9715844 | -2.6063628 |
| H | -7.8394840 | -1.8206569 | -2.8895829 |
| C | -7.2726183 | 0.0748798  | -2.0263831 |
| H | -6.4282742 | 1.8413311  | -1.1190453 |
| H | -0.0030547 | 6.5267735  | 1.8374993  |
| C | 2.0821001  | 6.8992468  | 2.2495844  |
| H | 4.2107632  | 6.9723221  | 2.5998863  |
| H | 7.8365809  | 1.8176680  | 2.8948179  |
| C | 7.2769010  | -0.0698624 | 2.0097329  |
| H | 6.4399342  | -1.8286122 | 1.0809126  |
| H | -1.9365684 | -7.9592731 | -2.4389268 |
| H | -8.2451826 | 0.5288688  | -2.1905728 |
| H | 1.9323167  | 7.9533879  | 2.4624497  |
| H | 8.2504534  | -0.5227889 | 2.1709814  |

5<sup>2+</sup> : dication

60

Energy = -1386.681639953

|   |            |            |            |
|---|------------|------------|------------|
| H | 0.1871116  | -2.4782417 | -0.0070609 |
| C | 0.1131585  | -1.3973834 | -0.0137936 |
| C | 1.1628840  | -0.6312622 | 0.4627647  |
| C | -1.0592742 | -0.7728406 | -0.4812807 |
| H | 2.0555885  | -1.1144213 | 0.8414159  |
| C | 1.0591384  | 0.7730594  | 0.4805288  |
| C | -1.1630703 | 0.6314663  | -0.4634600 |
| C | -2.1477651 | -1.5670337 | -0.9765178 |
| C | 2.1476451  | 1.5671877  | 0.9757912  |
| C | -0.1132401 | 1.3975912  | 0.0128687  |
| H | -2.0557564 | 1.1146769  | -0.8419908 |
| C | -2.6369970 | -2.7864788 | -1.4077384 |

|   |            |            |            |   |            |            |            |
|---|------------|------------|------------|---|------------|------------|------------|
| C | -3.4694137 | -1.6687737 | -1.3705991 | C | -1.1248582 | -0.8203702 | -0.5108855 |
| C | 2.6371276  | 2.7867122  | 1.4065062  | F | 2.3406972  | -1.2440140 | 0.6932853  |
| C | 3.4690111  | 1.6685741  | 1.3708911  | C | 1.1251558  | 0.8200898  | 0.5107790  |
| H | -0.1868693 | 2.4785156  | 0.0054360  | C | -1.1919247 | 0.6121982  | -0.3240358 |
| C | -2.4327355 | -4.1666898 | -1.6927647 | C | -2.1608131 | -1.5762716 | -0.9823366 |
| C | -4.7457993 | -1.0710111 | -1.5744060 | C | 2.1610764  | 1.5760588  | 0.9822134  |
| C | 2.4335271  | 4.1672947  | 1.6902083  | C | -0.1644323 | 1.3612864  | 0.1423776  |
| C | 4.7448804  | 1.0703644  | 1.5766406  | F | -2.3403540 | 1.2437916  | -0.6934724 |
| C | -1.1352132 | -4.7177230 | -1.6229032 | C | -2.7147295 | -2.8173064 | -1.4280211 |
| C | -3.5245451 | -4.9867471 | -2.0479812 | C | -3.5179595 | -1.7300693 | -1.4067075 |
| C | -5.7816216 | -1.8038578 | -2.1914134 | C | 2.7147872  | 2.8171509  | 1.4279410  |
| C | -4.9787715 | 0.2568701  | -1.1566368 | C | 3.5182329  | 1.7300698  | 1.4065084  |
| C | 1.1361404  | 4.7186860  | 1.6207501  | F | -0.3276149 | 2.7109442  | 0.2197265  |
| C | 3.5259547  | 4.9873230  | 2.0435971  | C | -2.5777367 | -4.2199266 | -1.7065152 |
| C | 5.7794959  | 1.8024263  | 2.1965941  | C | -4.8194987 | -1.1773618 | -1.6599528 |
| C | 4.9784320  | -0.2571609 | 1.1580802  | C | 2.5774531  | 4.2196930  | 1.7066818  |
| H | -0.2923992 | -4.0858113 | -1.3663122 | C | 4.8198707  | 1.1775806  | 1.6597010  |
| C | -0.9382425 | -6.0610048 | -1.9074721 | C | -1.3085040 | -4.8165332 | -1.8412648 |
| H | -4.5232944 | -4.5679933 | -2.0915541 | C | -3.7297201 | -5.0210691 | -1.8593093 |
| C | -3.3192622 | -6.3317684 | -2.3203239 | C | -5.7438662 | -1.8923433 | -2.4515600 |
| H | -5.6014694 | -2.8199485 | -2.5227851 | C | -5.2000762 | 0.0686981  | -1.1237452 |
| C | -7.0217837 | -1.2143323 | -2.3908302 | C | 1.3080711  | 4.8158730  | 1.8418794  |
| H | -4.1894094 | 0.8164443  | -0.6674274 | C | 3.7292395  | 5.0211555  | 1.8593144  |
| C | -6.2252244 | 0.8339530  | -1.3502204 | C | 5.7442026  | 1.8927766  | 2.4511427  |
| H | 0.2928799  | 4.0867936  | 1.3655326  | C | 5.2005863  | -0.0684711 | 1.1235656  |
| C | 0.9398688  | 6.0623123  | 1.9042031  | H | -0.4208672 | -4.2062701 | -1.7303313 |
| H | 4.5246610  | 4.5683563  | 2.0862837  | C | -1.1994238 | -6.1734558 | -2.1314478 |
| C | 3.3213568  | 6.3327048  | 2.3146819  | H | -4.7113144 | -4.5751133 | -1.7364135 |
| H | 5.5986391  | 2.8180257  | 2.5291021  | C | -3.6117687 | -6.3777709 | -2.1344230 |
| C | 7.0191305  | 1.2124711  | 2.3980226  | H | -5.4527996 | -2.8431707 | -2.8860210 |
| H | 4.1899759  | -0.8161404 | 0.6666984  | C | -7.0075774 | -1.3716761 | -2.7007519 |
| C | 6.2244487  | -0.8345782 | 1.3535239  | H | -4.4975177 | 0.6195904  | -0.5109958 |
| H | 0.0595135  | -6.4845375 | -1.8616759 | C | -6.4731654 | 0.5763683  | -1.3663196 |
| C | -2.0286824 | -6.8676959 | -2.2525578 | H | 0.4205922  | 4.2053613  | 1.7310625  |
| H | -4.1588589 | -6.9648966 | -2.5869734 | C | 1.1986552  | 6.1727109  | 2.1323058  |
| H | -7.8169667 | -1.7744567 | -2.8712855 | H | 4.7109507  | 4.5754719  | 1.7363071  |
| C | -7.2443132 | 0.1009812  | -1.9691315 | C | 3.6109359  | 6.3778120  | 2.1345392  |
| H | -6.4083915 | 1.8518861  | -1.0227226 | H | 5.4530496  | 2.8436171  | 2.8855062  |
| H | -0.0577672 | 6.4861763  | 1.8588413  | C | 7.0080207  | 1.3723448  | 2.7002369  |
| C | 2.0308754  | 6.8689591  | 2.2475999  | H | 4.4980489  | -0.6195387 | 0.5109416  |
| H | 4.1613874  | 6.9659035  | 2.5797913  | C | 6.4737952  | -0.5759040 | 1.3660347  |
| H | 7.8134365  | 1.7719376  | 2.8806878  | H | -0.2164661 | -6.6218138 | -2.2426066 |
| C | 7.2423256  | -0.1024345 | 1.9754041  | C | -2.3462375 | -6.9586756 | -2.2759687 |
| H | 6.4082435  | -1.8521253 | 1.0251732  | H | -4.5050133 | -6.9866191 | -2.2388429 |
| H | -1.8712912 | -7.9195296 | -2.4704559 | H | -7.7066736 | -1.9257420 | -3.3202091 |
| H | -8.2172380 | 0.5574608  | -2.1228647 | C | -7.3788755 | -0.1370861 | -2.1558166 |
| H | 1.8740035  | 7.9210289  | 2.4647351  | H | -6.7600145 | 1.5335629  | -0.9407436 |
| H | 8.2148253  | -0.5592636 | 2.1307859  | H | 0.2155789  | 6.6206638  | 2.2440127  |
|   |            |            |            | C | 2.3452566  | 6.9583085  | 2.2764585  |
|   |            |            |            | H | 4.5040291  | 6.9869073  | 2.2388209  |
|   |            |            |            | H | 7.7070912  | 1.9266039  | 3.3195460  |
|   |            |            |            | C | 7.3794711  | 0.1377700  | 2.1553731  |
|   |            |            |            | H | 6.7607301  | -1.5330732 | 0.9404586  |
|   |            |            |            | H | -2.2565130 | -8.0183282 | -2.4964545 |
|   |            |            |            | H | -8.3689993 | 0.2657764  | -2.3478451 |

**600** : SET reduction of **6+r**  
60  
Energy = -1784.132097284

|   |           |            |            |
|---|-----------|------------|------------|
| F | 0.3278354 | -2.7112751 | -0.2194359 |
| C | 0.1647055 | -1.3615606 | -0.1423819 |
| C | 1.1922563 | -0.6124774 | 0.3239176  |

|   |           |            |           |
|---|-----------|------------|-----------|
| H | 2.2552538 | 8.0179555  | 2.4968535 |
| H | 8.3696861 | -0.2649043 | 2.3473238 |

**6Cl<sub>2</sub>a : higher 6Cl<sub>2</sub>**

62

Energy = -2704.663179227

|   |            |            |            |
|---|------------|------------|------------|
| F | 1.4316286  | -2.1440693 | 0.8795521  |
| C | 0.7400582  | -1.0769149 | 0.4438842  |
| C | -0.6260956 | -1.1983170 | 0.2677715  |
| C | 1.4166327  | 0.1302669  | 0.1783310  |
| F | -1.2075566 | -2.3815148 | 0.5422892  |
| C | -1.4192868 | -0.1293838 | -0.1863766 |
| C | 0.6234274  | 1.1992040  | -0.2758523 |
| C | 2.8253001  | 0.2388658  | 0.3679806  |
| C | -2.8282296 | -0.2371876 | -0.3742796 |
| C | -0.7427083 | 1.0778045  | -0.4519737 |
| F | 1.2048201  | 2.3827620  | -0.5491202 |
| C | 4.0109845  | -0.5279074 | 0.7817598  |
| C | 3.9900690  | 0.8781563  | 0.3463603  |
| C | -4.0146874 | 0.5323857  | -0.7806841 |
| C | -3.9933073 | -0.8757960 | -0.3521218 |
| F | -1.4343175 | 2.1451600  | -0.8871564 |
| C | 4.5996110  | -1.6490240 | -0.0204952 |
| C | 4.8641764  | 1.9931159  | 0.1326114  |
| C | -4.5993182 | 1.6500943  | 0.0292265  |
| C | -4.8671772 | -1.9915267 | -0.1416651 |
| C | 4.9415231  | -1.3907326 | -1.3565615 |
| C | 4.7790377  | -2.9397105 | 0.4868506  |
| C | 6.2413392  | 1.8169257  | 0.3751431  |
| C | 4.3937176  | 3.2456017  | -0.3082136 |
| C | -4.9331333 | 1.3864201  | 1.3663013  |
| C | -4.7821540 | 2.9427425  | -0.4718052 |
| C | -6.2457160 | -1.8121837 | -0.3737041 |
| C | -4.3948375 | -3.2481317 | 0.2852582  |
| H | 4.8049483  | -0.3922650 | -1.7630649 |
| C | 5.4532289  | -2.4025894 | -2.1664158 |
| H | 4.5222746  | -3.1491140 | 1.5194024  |
| C | 5.2874930  | -3.9532752 | -0.3266920 |
| H | 6.5979940  | 0.8504317  | 0.7177877  |
| C | 7.1275658  | 2.8702265  | 0.1791380  |
| H | 3.3353780  | 3.3862369  | -0.4934550 |
| C | 5.2869714  | 4.2929616  | -0.5028204 |
| H | -4.7936947 | 0.3863745  | 1.7679791  |
| C | -5.4407251 | 2.3947052  | 2.1831663  |
| H | -4.5316865 | 3.1563694  | -1.5050289 |
| C | -5.2862910 | 3.9528063  | 0.3487784  |
| H | -6.6038261 | -0.8425590 | -0.7058184 |
| C | -7.1315251 | -2.8663727 | -0.1806600 |
| H | -3.3351888 | -3.3912249 | 0.4609348  |
| C | -5.2876680 | -4.2963727 | 0.4769546  |
| H | 5.7186831  | -2.1827141 | -3.1966781 |
| C | 5.6280206  | -3.6901753 | -1.6542414 |
| H | 5.4185333  | -4.9514053 | 0.0819358  |
| H | 8.1872752  | 2.7281268  | 0.3681420  |
| C | 6.6527904  | 4.1093245  | -0.2608372 |

|    |            |            |            |
|----|------------|------------|------------|
| H  | 4.9209777  | 5.2571112  | -0.8429159 |
| H  | -5.7000377 | 2.1705820  | 3.2140860  |
| C  | -5.6187610 | 3.6843327  | 1.6772748  |
| H  | -5.4200190 | 4.9525315  | -0.0550524 |
| H  | -8.1923526 | -2.7218298 | -0.3613817 |
| C  | -6.6549334 | -4.1094929 | 0.2457941  |
| H  | -4.9202907 | -5.2637601 | 0.8061971  |
| H  | 6.0281225  | -4.4796670 | -2.2839541 |
| H  | 7.3450905  | 4.9319459  | -0.4141570 |
| H  | -6.0154666 | 4.4711291  | 2.3124787  |
| H  | -7.3469117 | -4.9328496 | 0.3966143  |
| Cl | 4.2066131  | -0.7934440 | 2.6204789  |
| Cl | -4.2163829 | 0.8068093  | -2.6172798 |

**6Cl<sub>2</sub> : adduct of 6<sup>2+</sup> and two chloride anions**

62

Energy = -2704.663348752

|   |            |            |            |
|---|------------|------------|------------|
| F | -2.0525067 | -1.7857487 | 0.7833566  |
| C | -1.0127843 | -0.9250031 | 0.7845949  |
| C | -1.2996561 | 0.4347286  | 0.7794479  |
| C | 0.2981149  | -1.4084905 | 0.7806511  |
| F | -2.5988388 | 0.8023922  | 0.7803237  |
| C | -0.2980128 | 1.4088185  | 0.7809690  |
| C | 1.2997597  | -0.4344026 | 0.7783331  |
| C | 0.6128276  | -2.8683031 | 0.7373064  |
| C | -0.6127337 | 2.8686265  | 0.7376844  |
| C | 1.0128815  | 0.9253208  | 0.7837615  |
| F | 2.5989408  | -0.8020715 | 0.7781389  |
| C | -0.2025153 | -3.9332696 | 0.1580799  |
| C | 0.9315679  | -3.6375850 | -0.4700464 |
| C | -0.9316591 | 3.6377795  | -0.4697096 |
| C | 0.2024978  | 3.9335725  | 0.1582255  |
| F | 2.0526130  | 1.7860928  | 0.7814759  |
| C | -1.3512463 | -4.7683337 | 0.3702537  |
| C | 1.9064829  | -3.8676351 | -1.4982501 |
| C | -1.9065719 | 3.8674584  | -1.4979847 |
| C | 1.3511918  | 4.7687019  | 0.3703726  |
| C | -2.0533697 | -4.6974659 | 1.5880180  |
| C | -1.7689553 | -5.6848259 | -0.6136366 |
| C | 1.6429646  | -4.7815322 | -2.5380169 |
| C | 3.1397878  | -3.1900426 | -1.4752058 |
| C | -3.1394601 | 3.1890844  | -1.4753222 |
| C | -1.6433246 | 4.7816475  | -2.5375564 |
| C | 1.7688717  | 5.6853414  | -0.6133978 |
| C | 2.0533185  | 4.6977242  | 1.5881292  |
| H | -1.7278945 | -3.9957692 | 2.3486331  |
| C | -3.1452296 | -5.5289725 | 1.8152767  |
| H | -1.2377523 | -5.7396737 | -1.5583619 |
| C | -2.8684005 | -6.5051299 | -0.3840916 |
| H | 0.6944300  | -5.3078612 | -2.5634043 |
| C | 2.5902873  | -5.0053716 | -3.5306204 |
| H | 3.3480257  | -2.4944191 | -0.6704116 |
| C | 4.0856632  | -3.4241863 | -2.4688765 |
| H | -3.3474440 | 2.4932084  | -0.6706760 |
| C | -4.0852082 | 3.4227597  | -2.4692223 |



|    |            |            |            |
|----|------------|------------|------------|
| H  | -0.6950912 | 5.3085302  | -2.5626047 |
| C  | -2.5905224 | 5.0050102  | -3.5303863 |
| H  | 1.2377569  | 5.7402323  | -1.5581750 |
| C  | 2.8682039  | 6.5057505  | -0.3836967 |
| H  | 1.7279131  | 3.9958611  | 2.3486190  |
| C  | 3.1450597  | 5.5293369  | 1.8155565  |
| H  | -3.6782896 | -5.4728363 | 2.7597162  |
| C  | -3.5575579 | -6.4313313 | 0.8305317  |
| H  | -3.1888188 | -7.2045067 | -1.1505667 |
| H  | 2.3776051  | -5.7089486 | -4.3299926 |
| C  | 3.8138316  | -4.3283136 | -3.4990215 |
| H  | 5.0366349  | -2.9005905 | -2.4415722 |
| H  | -5.0358540 | 2.8985528  | -2.4422613 |
| C  | -3.8136599 | 4.3271985  | -3.4991751 |
| H  | -2.3780828 | 5.7088254  | -4.3296136 |
| H  | 3.1885881  | 7.2052418  | -1.1500795 |
| C  | 3.5572860  | 6.4319137  | 0.8309685  |
| H  | 3.6780926  | 5.4731273  | 2.7600060  |
| H  | -4.4135342 | -7.0757178 | 1.0084238  |
| H  | 4.5525295  | -4.5064145 | -4.2749648 |
| H  | -4.5522795 | 4.5049652  | -4.2752701 |
| H  | 4.4131292  | 7.0764356  | 1.0090121  |
| Cl | 1.5477423  | -3.3109795 | 2.3357215  |
| Cl | -1.5473456 | 3.3114929  | 2.3361334  |

**6Cl<sup>+</sup>** : higher **6Cl<sup>+</sup>**

61

Energy = -2244.240430386

|   |            |            |            |
|---|------------|------------|------------|
| F | 0.5896940  | -2.1039803 | -1.6569602 |
| C | 0.3080326  | -0.9661354 | -1.0078176 |
| C | 1.3357566  | -0.2831582 | -0.3857331 |
| C | -1.0203783 | -0.4924946 | -0.9753459 |
| F | 2.5827124  | -0.7695809 | -0.4691728 |
| C | 1.1108040  | 0.9289587  | 0.2974738  |
| C | -1.2436470 | 0.7163437  | -0.2871540 |
| C | -2.0612292 | -1.1971189 | -1.6415083 |
| C | 2.1701146  | 1.6342345  | 0.9322132  |
| C | -0.2153090 | 1.4078756  | 0.3216564  |
| F | -2.4862375 | 1.2196676  | -0.2246441 |
| C | -2.3236583 | -2.3000046 | -2.5796829 |
| C | -3.3331912 | -1.4032059 | -1.9726875 |
| C | 2.6842073  | 2.8102283  | 1.4541748  |
| C | 3.4420081  | 1.6457682  | 1.4818418  |
| F | -0.4937989 | 2.5417384  | 0.9817059  |
| C | -2.2076451 | -3.7498323 | -2.2197916 |
| C | -4.7448661 | -1.1965628 | -1.9166100 |
| C | 2.5621626  | 4.2009914  | 1.7442468  |
| C | 4.6484275  | 0.9764608  | 1.8419018  |
| C | -2.2537220 | -4.7759119 | -3.1689356 |
| C | -2.0943896 | -4.0836129 | -0.8617687 |
| C | -5.5675811 | -1.9759708 | -2.7563353 |
| C | -5.3304959 | -0.2556914 | -1.0447163 |
| C | 1.5193503  | 4.9622779  | 1.1763688  |
| C | 3.5019517  | 4.8194151  | 2.5959896  |
| C | 5.7734849  | 1.7328639  | 2.2334793  |

|    |            |            |            |
|----|------------|------------|------------|
| C  | 4.7202070  | -0.4321060 | 1.8214158  |
| H  | -2.3339888 | -4.5301591 | -4.2221877 |
| C  | -2.1878710 | -6.1106937 | -2.7670218 |
| H  | -2.0630930 | -3.2959252 | -0.1138638 |
| C  | -2.0257121 | -5.4165425 | -0.4626707 |
| H  | -5.1093029 | -2.6997429 | -3.4230901 |
| C  | -6.9468447 | -1.8100256 | -2.7298903 |
| H  | -4.7004950 | 0.3333302  | -0.3885548 |
| C  | -6.7106249 | -0.1007985 | -1.0220957 |
| H  | 0.8066333  | 4.4891137  | 0.5119288  |
| C  | 1.4272624  | 6.3188624  | 1.4561051  |
| H  | 4.2930025  | 4.2290364  | 3.0447541  |
| C  | 3.3899295  | 6.1724740  | 2.8825013  |
| H  | 5.7216066  | 2.8159483  | 2.2327162  |
| C  | 6.9512316  | 1.0889117  | 2.5850694  |
| H  | 3.8517334  | -1.0121884 | 1.5340779  |
| C  | 5.8983190  | -1.0662320 | 2.1914446  |
| H  | -2.2238859 | -6.8964921 | -3.5161702 |
| C  | -2.0729927 | -6.4369078 | -1.4150273 |
| H  | -1.9326762 | -5.6566846 | 0.5925974  |
| H  | -7.5774954 | -2.4087968 | -3.3794909 |
| C  | -7.5194769 | -0.8733029 | -1.8638683 |
| H  | -7.1623832 | 0.6205061  | -0.3481153 |
| H  | 0.6330197  | 6.9098451  | 1.0120505  |
| C  | 2.3566037  | 6.9223247  | 2.3101815  |
| H  | 4.1045834  | 6.6468082  | 3.5469423  |
| H  | 7.8208399  | 1.6695306  | 2.8746428  |
| C  | 7.0126607  | -0.3087986 | 2.5680339  |
| H  | 5.9535133  | -2.1498312 | 2.1870831  |
| H  | -2.0180869 | -7.4765471 | -1.1056119 |
| H  | -8.5976881 | -0.7460792 | -1.8417008 |
| H  | 2.2762421  | 7.9825464  | 2.5297786  |
| H  | 7.9331883  | -0.8101008 | 2.8510054  |
| Cl | -1.9168525 | -1.9547072 | -4.3517656 |

**6Cl<sup>+</sup>** : adduct of **6<sup>2+</sup>** and one chloride

61

Energy = -2244.240751943

|   |            |            |            |
|---|------------|------------|------------|
| F | 0.1109582  | -2.6404134 | -0.6325899 |
| C | 0.1042117  | -1.3007527 | -0.7232003 |
| C | 1.0568637  | -0.6000271 | 0.0013650  |
| C | -0.8447722 | -0.6514364 | -1.5216692 |
| F | 1.9220692  | -1.2831107 | 0.7652176  |
| C | 1.1100177  | 0.8039237  | -0.0211205 |
| C | -0.7875232 | 0.7497161  | -1.5459573 |
| C | -1.8948111 | -1.4029072 | -2.2755617 |
| C | 2.0829876  | 1.5291458  | 0.7269241  |
| C | 0.1527320  | 1.4582826  | -0.8182532 |
| F | -1.6558731 | 1.4468688  | -2.2968643 |
| C | -2.4842769 | -2.6890931 | -1.9093640 |
| C | -3.2673633 | -1.6194038 | -1.8003458 |
| C | 2.4964673  | 2.7036356  | 1.3305781  |
| C | 3.3037795  | 1.5716306  | 1.3771230  |
| F | 0.1703866  | 2.7971647  | -0.9057990 |
| C | -2.2787520 | -4.1094713 | -1.9318247 |

C -4.5334310 -0.9977344 -1.5359989  
 C 2.2742227 4.0681441 1.6780807  
 C 4.5162518 0.9439111 1.7867810  
 C -1.1234575 -4.6412965 -2.5350422  
 C -3.2382740 -4.9840575 -1.3865285  
 C -5.5755554 -1.7371184 -0.9415936  
 C -4.7536495 0.3493726 -1.8790220  
 C 0.9989486 4.6484635 1.5158375  
 C 3.3364782 4.8367586 2.1993144  
 C 5.3520309 1.5865417 2.7245556  
 C 4.8893341 -0.3067190 1.2515069  
 H -0.3887475 -3.9681962 -2.9642880  
 C -0.9360925 -6.0182974 -2.5922897  
 H -4.1296001 -4.5812041 -0.9167630  
 C -3.0389759 -6.3592407 -1.4382964  
 H -5.4121616 -2.7746474 -0.6693565  
 C -6.8048437 -1.1373796 -0.6935432  
 H -3.9586698 0.9159379 -2.3497033  
 C -5.9898077 0.9397587 -1.6352074  
 H 0.1817750 4.0528177 1.1275299  
 C 0.7958352 5.9740324 1.8738125  
 H 4.3198343 4.3932968 2.3086908  
 C 3.1263903 6.1658613 2.5380592  
 H 5.0554197 2.5401710 3.1468510  
 C 6.5333522 0.9799996 3.1268839  
 H 4.2524231 -0.7927217 0.5223858  
 C 6.0820831 -0.8957721 1.6478209  
 H -0.0461202 -6.4224195 -3.0651635  
 C -1.8896344 -6.8795073 -2.0417171  
 H -3.7797286 -7.0279168 -1.0104143  
 H -7.6015453 -1.7125911 -0.2317154  
 C -7.0159923 0.2010601 -1.0403349  
 H -6.1547144 1.9774120 -1.9092250  
 H -0.1863726 6.4207950 1.7600716  
 C 1.8570800 6.7326477 2.3795165  
 H 3.9449349 6.7619162 2.9276958  
 H 7.1716165 1.4669370 3.8567216  
 C 6.9001856 -0.2571737 2.5860724  
 H 6.3779658 -1.8523301 1.2299348  
 H -1.7388551 -7.9541498 -2.0837097  
 H -7.9785476 0.6655625 -0.8481386  
 H 1.6939127 7.7707041 2.6525856  
 H 7.8291851 -0.7254201 2.8966938  
 Cl -1.6079212 -1.0798219 -4.1146174

**6<sup>r</sup>** : radical cation

60

Energy = -1783.984208533

F 0.2188289 -2.7199441 0.0198915  
 C 0.1154782 -1.3764259 -0.0284769  
 C 1.1531899 -0.6192322 0.4436216  
 C -1.0975524 -0.8009239 -0.5094979  
 F 2.2397254 -1.2452622 0.9391904  
 C 1.1033801 0.8052037 0.4923772  
 C -1.1467459 0.6236409 -0.4619810

C -2.1574488 -1.5740584 -0.9892243  
 C 2.1617309 1.5778276 0.9763010  
 C -0.1091378 1.3808270 0.0103320  
 F -2.2331165 1.2497958 -0.9577655  
 C -2.6812969 -2.8046880 -1.4190057  
 C -3.4950625 -1.7017381 -1.3995501  
 C 2.6830191 2.8066722 1.4142094  
 C 3.4980407 1.7047134 1.3906734  
 F -0.2119953 2.7243903 -0.0385580  
 C -2.5275201 -4.2011547 -1.6955214  
 C -4.7895540 -1.1379650 -1.6373240  
 C 2.5261203 4.2007847 1.7002729  
 C 4.7920509 1.1401523 1.6291372  
 C -1.2483312 -4.7788275 -1.8201832  
 C -3.6739583 -5.0071356 -1.8582393  
 C -5.7280442 -1.8549284 -2.4091365  
 C -5.1438603 0.1159755 -1.1009949  
 C 1.2454576 4.7754624 1.8238017  
 C 3.6706198 5.0070303 1.8749656  
 C 5.7264793 1.8508235 2.4115541  
 C 5.1495706 -0.1086215 1.0830143  
 H -0.3669986 -4.1593879 -1.7084076  
 C -1.1244637 -6.1331143 -2.1078005  
 H -4.6597809 -4.5687227 -1.7455346  
 C -3.5394400 -6.3626967 -2.1276445  
 H -5.4522306 -2.8126132 -2.8375937  
 C -6.9875151 -1.3206979 -2.6466797  
 H -4.4296154 0.6622763 -0.4974439  
 C -6.4131951 0.6341357 -1.3299136  
 H 0.3655833 4.1557898 1.7021372  
 C 1.1182165 6.1269342 2.1229384  
 H 4.6575969 4.5709911 1.7630387  
 C 3.5327831 6.3599504 2.1556892  
 H 5.4478338 2.8041884 2.8477927  
 C 6.9851829 1.3151819 2.6500698  
 H 4.4382186 -0.6500878 0.4716712  
 C 6.4183446 -0.6278336 1.3126367  
 H -0.1381914 -6.5736452 -2.2144669  
 C -2.2656856 -6.9268217 -2.2569433  
 H -4.4236363 -6.9821633 -2.2394828  
 H -7.7023451 -1.8694381 -3.2515929  
 C -7.3335842 -0.0782678 -2.1044648  
 H -6.6876547 1.5951999 -0.9065379  
 H 0.1308060 6.5650025 2.2291954  
 C 2.2575611 6.9209274 2.2844331  
 H 4.4154782 6.9797745 2.2769967  
 H 7.6969048 1.8588436 3.2631804  
 C 7.3345781 0.0779958 2.0980731  
 H 6.6954664 -1.5847325 0.8816384  
 H -2.1634712 -7.9856379 -2.4748377  
 H -8.3216442 0.3339002 -2.2857333  
 H 2.1527463 7.9775396 2.5115921  
 H 8.3220839 -0.3351652 2.2801110

**6<sup>2+</sup>** : dication

60

Energy = -1783.800550185

|   |            |            |            |
|---|------------|------------|------------|
| F | -0.0060743 | -2.6890132 | 0.4317100  |
| C | -0.0018149 | -1.3735492 | 0.1958440  |
| C | 1.0489260  | -0.6081404 | 0.6745970  |
| C | -1.0775033 | -0.7853466 | -0.4925646 |
| F | 2.0290412  | -1.2073204 | 1.3577152  |
| C | 1.0785510  | 0.7854103  | 0.4901767  |
| C | -1.0477602 | 0.6081708  | -0.6772030 |
| C | -2.1638103 | -1.5772877 | -0.9871785 |
| C | 2.1644949  | 1.5774136  | 0.9854857  |
| C | 0.0029363  | 1.3735903  | -0.1983572 |
| F | -2.0276508 | 1.2072734  | -1.3606470 |
| C | -2.6494607 | -2.7968596 | -1.4169190 |
| C | -3.4846677 | -1.6761265 | -1.3791259 |
| C | 2.6496932  | 2.7969390  | 1.4158655  |
| C | 3.4850086  | 1.6762438  | 1.3785664  |
| F | 0.0071180  | 2.6890999  | -0.4340934 |
| C | -2.4559288 | -4.1742379 | -1.7096430 |
| C | -4.7648540 | -1.0922212 | -1.5801203 |
| C | 2.4558788  | 4.1742953  | 1.7085517  |
| C | 4.7649582  | 1.0922834  | 1.5809316  |
| C | -1.1552495 | -4.7237610 | -1.7277775 |
| C | -3.5721797 | -4.9926185 | -1.9899822 |
| C | -5.7661144 | -1.8204499 | -2.2593973 |
| C | -5.0404108 | 0.2061215  | -1.0981017 |
| C | 1.1552281  | 4.7239572  | 1.7248378  |
| C | 3.5717513  | 4.9925490  | 1.9907327  |
| C | 5.7655233  | 1.8204230  | 2.2613267  |
| C | 5.0409786  | -0.2060831 | 1.0992660  |
| H | -0.2990367 | -4.0911051 | -1.5271893 |
| C | -0.9819246 | -6.0673583 | -2.0246464 |
| H | -4.5709480 | -4.5723391 | -1.9603595 |
| C | -3.3874814 | -6.3382555 | -2.2698466 |
| H | -5.5477306 | -2.8107832 | -2.6422505 |
| C | -7.0146405 | -1.2518997 | -2.4618235 |
| H | -4.2757382 | 0.7574717  | -0.5643615 |
| C | -6.2977277 | 0.7579887  | -1.2929001 |
| H | 0.2992415  | 4.0914413  | 1.5228008  |
| C | 0.9815835  | 6.0675206  | 2.0216999  |
| H | 4.5704976  | 4.5721647  | 1.9624929  |
| C | 3.3867892  | 6.3381268  | 2.2706251  |
| H | 5.5467723  | 2.8108019  | 2.6438335  |
| C | 7.0137387  | 1.2517643  | 2.4653212  |
| H | 4.2768824  | -0.7574126 | 0.5646821  |
| C | 6.2980137  | -0.7580550 | 1.2955465  |
| H | 0.0158297  | -6.4924337 | -2.0501521 |
| C | -2.0947675 | -6.8738491 | -2.2905538 |
| H | -4.2436072 | -6.9723287 | -2.4740279 |
| H | -7.7823235 | -1.8040315 | -2.9933326 |
| C | -7.2811255 | 0.0333121  | -1.9764751 |
| H | -6.5181215 | 1.7509556  | -0.9156510 |
| H | -0.0161698 | 6.4926809  | 2.0456458  |
| C | 2.0940926  | 6.8738290  | 2.2895326  |
| H | 4.2426621  | 6.9721007  | 2.4761758  |

|   |            |            |            |
|---|------------|------------|------------|
| H | 7.7808175  | 1.8037804  | 2.9978335  |
| C | 7.2806852  | -0.0334605 | 1.9802455  |
| H | 6.5186951  | -1.7510936 | 0.9186731  |
| H | -1.9533357 | -7.9261562 | -2.5169068 |
| H | -8.2619168 | 0.4725436  | -2.1304091 |
| H | 1.9524093  | 7.9260755  | 2.5160059  |
| H | 8.2612770  | -0.4727513 | 2.1352748  |

**700** : SET reduction of **7+r**

60

Energy = -3769.755814341

|   |            |            |            |
|---|------------|------------|------------|
| F | 0.1965982  | -2.7334455 | 0.0765485  |
| C | 0.1238190  | -1.3816328 | -0.0150181 |
| C | 1.1504951  | -0.6310006 | 0.4501940  |
| C | -1.1116334 | -0.8124790 | -0.5037384 |
| F | 2.2280443  | -1.2481437 | 0.9971042  |
| C | 1.1116123  | 0.8128534  | 0.5036625  |
| C | -1.1504651 | 0.6313758  | -0.4503590 |
| C | -2.1436131 | -1.5665024 | -0.9710770 |
| C | 2.1435995  | 1.5668380  | 0.9710368  |
| C | -0.1238613 | 1.3820099  | 0.0150140  |
| F | -2.2278500 | 1.2485484  | -0.9975944 |
| C | -2.6996506 | -2.8054674 | -1.4182812 |
| C | -3.5008135 | -1.7247495 | -1.3926473 |
| C | 2.6997370  | 2.8057263  | 1.4183449  |
| C | 3.5007964  | 1.7249446  | 1.3926343  |
| F | -0.1967715 | 2.7338301  | -0.0762390 |
| C | -2.5797340 | -4.2031767 | -1.6925316 |
| C | -4.7980347 | -1.1864011 | -1.6581135 |
| C | 2.5799628  | 4.2034524  | 1.6925733  |
| C | 4.7978956  | 1.1863113  | 1.6581497  |
| C | -1.3723105 | -4.7842815 | -2.1202620 |
| C | -3.6894488 | -5.0582091 | -1.5559263 |
| C | -5.6085523 | -1.7344555 | -2.6701045 |
| C | -5.3277291 | -0.1071701 | -0.9278955 |
| C | 1.3726090  | 4.7847067  | 2.1202856  |
| C | 3.6897440  | 5.0583701  | 1.5558243  |
| C | 5.6082706  | 1.7338117  | 2.6705413  |
| C | 5.3275134  | 0.1072252  | 0.9276745  |
| F | -0.3000603 | -4.0112595 | -2.3392454 |
| C | -1.2720024 | -6.1426374 | -2.3888324 |
| F | -4.8577250 | -4.5604648 | -1.1176232 |
| C | -3.6037443 | -6.4181972 | -1.8121578 |
| F | -5.1379097 | -2.7452601 | -3.4194068 |
| C | -6.8673183 | -1.2285248 | -2.9568093 |
| F | -4.6361460 | 0.4092840  | 0.0969288  |
| C | -6.5891896 | 0.4060189  | -1.1972016 |
| F | 0.3002568  | 4.0118245  | 2.3392687  |
| C | 1.2724510  | 6.1430924  | 2.3887494  |
| F | 4.8579672  | 4.5604406  | 1.1175756  |
| C | 3.6041532  | 6.4184131  | 1.8118024  |
| F | 5.1376543  | 2.7444750  | 3.4200575  |
| C | 6.8668137  | 1.2274329  | 2.9574479  |
| F | 4.6359924  | -0.4087972 | -0.0974108 |
| C | 6.5888144  | -0.4063021 | 1.1970693  |

|   |            |            |            |
|---|------------|------------|------------|
| F | -0.1161935 | -6.6686176 | -2.8211194 |
| C | -2.3891329 | -6.9623188 | -2.2313475 |
| F | -4.6701977 | -7.2152936 | -1.6477548 |
| F | -7.6073868 | -1.7517149 | -3.9459698 |
| C | -7.3596539 | -0.1533152 | -2.2161175 |
| F | -7.0819695 | 1.4199370  | -0.4701985 |
| F | 0.1167249  | 6.6692155  | 2.8210971  |
| C | 2.3896180  | 6.9626797  | 2.2310249  |
| F | 4.6706595  | 7.2153911  | 1.6471974  |
| F | 7.6067148  | 1.7500654  | 3.9470241  |
| C | 7.3591101  | 0.1524156  | 2.2164515  |
| F | 7.0815884  | -1.4200099 | 0.4697612  |
| F | -2.2985018 | -8.2710608 | -2.4889835 |
| F | -8.5752815 | 0.3368182  | -2.4795065 |
| F | 2.2991007  | 8.2714694  | 2.4884742  |
| F | 8.5745651  | -0.3380885 | 2.4799543  |

7Cl<sub>2</sub>a : higher 7Cl<sub>2</sub>

62

Energy = -4690.283142871

|   |            |            |            |
|---|------------|------------|------------|
| F | 1.2058521  | -1.2348540 | 2.1074375  |
| C | 0.6272417  | -0.6377291 | 1.0546952  |
| C | -0.7441609 | -0.7514057 | 0.8918992  |
| C | 1.4138101  | 0.1219728  | 0.1720851  |
| F | -1.4478504 | -1.4312893 | 1.8106364  |
| C | -1.4137933 | -0.1234920 | -0.1731045 |
| C | 0.7442163  | 0.7497684  | -0.8929898 |
| C | 2.8361467  | 0.2088637  | 0.3187373  |
| C | -2.8362514 | -0.2095330 | -0.3192654 |
| C | -0.6271816 | 0.6360873  | -1.0558023 |
| F | 1.4479291  | 1.4298179  | -1.8116063 |
| C | 4.0569147  | -0.5548130 | 0.6654201  |
| C | 3.9933633  | 0.8421491  | 0.2103185  |
| C | -4.0567321 | 0.5549633  | -0.6653277 |
| C | -3.9938552 | -0.8421447 | -0.2106948 |
| F | -1.2056832 | 1.2328670  | -2.1087748 |
| C | 4.5203735  | -1.7114365 | -0.1649658 |
| C | 4.7678476  | 2.0331340  | 0.0687164  |
| C | -4.5194028 | 1.7114175  | 0.1656762  |
| C | -4.7691195 | -2.0326616 | -0.0693834 |
| C | 5.3270371  | -1.5482474 | -1.2953026 |
| C | 4.0970813  | -3.0174558 | 0.1124187  |
| C | 6.1621877  | 2.0268414  | 0.2653298  |
| C | 4.1672460  | 3.2766701  | -0.2012997 |
| C | -5.3251702 | 1.5476608  | 1.2966742  |
| C | -4.0958454 | 3.0173610  | -0.1115123 |
| C | -6.1634707 | -2.0252382 | -0.2658925 |
| C | -4.1694520 | -3.2767503 | 0.2001260  |
| F | 5.7304123  | -0.3197363 | -1.6776379 |
| C | 5.7280957  | -2.6213974 | -2.0861494 |
| F | 3.2690060  | -3.2519746 | 1.1462225  |
| C | 4.4900074  | -4.1066044 | -0.6571669 |
| F | 6.7934615  | 0.8871658  | 0.5783521  |
| C | 6.9193484  | 3.1858174  | 0.1647740  |
| F | 2.8365498  | 3.3532270  | -0.3410867 |

|    |            |            |            |
|----|------------|------------|------------|
| C  | 4.9093757  | 4.4433165  | -0.3061466 |
| F  | -5.7288421 | 0.3194622  | 1.6784036  |
| C  | -5.7248866 | 2.6207583  | 2.0883908  |
| F  | -3.2686468 | 3.2520336  | -1.1460421 |
| C  | -4.4876664 | 4.1063058  | 0.6589024  |
| F  | -6.7938870 | -0.8849815 | -0.5784760 |
| C  | -6.9214926 | -3.1837017 | -0.1658361 |
| F  | -2.8388071 | -3.3544149 | 0.3397106  |
| C  | -4.9124742 | -4.4428626 | 0.3046377  |
| F  | 6.5083332  | -2.4180943 | -3.1599871 |
| C  | 5.3144171  | -3.9088980 | -1.7616258 |
| F  | 4.0674323  | -5.3435598 | -0.3506829 |
| F  | 8.2458553  | 3.1515451  | 0.3541020  |
| C  | 6.2920912  | 4.3960712  | -0.1272650 |
| F  | 4.3108176  | 5.6137602  | -0.5670530 |
| F  | -6.5041501 | 2.4175287  | 3.1629759  |
| C  | -5.3110073 | 3.9082491  | 1.7640934  |
| F  | -4.0650476 | 5.3433206  | 0.3525448  |
| F  | -8.2480166 | -3.1483183 | -0.3549048 |
| C  | -6.2951453 | -4.3945433 | 0.1257177  |
| F  | -4.3148039 | -5.6138478 | 0.5651895  |
| F  | 5.6944509  | -4.9493493 | -2.5141679 |
| F  | 7.0143314  | 5.5148135  | -0.2237344 |
| F  | -5.6897469 | 4.9484687  | 2.5176893  |
| F  | -7.0182175 | -5.5127925 | 0.2217073  |
| Cl | 4.4908532  | -0.7972446 | 2.4377118  |
| Cl | -4.4912800 | 0.7979536  | -2.4374112 |

7Cl<sub>2</sub> : adduct of 7<sup>2+</sup> and two chloride anions

62

Energy = -4690.285780809

|   |            |            |            |
|---|------------|------------|------------|
| F | -2.2153562 | -1.7166024 | 0.7128647  |
| C | -1.1717750 | -0.8608786 | 0.6953379  |
| C | -1.4535493 | 0.5010472  | 0.6891821  |
| C | 0.1360160  | -1.3484634 | 0.6795033  |
| F | -2.7471722 | 0.8732542  | 0.6627089  |
| C | -0.4424415 | 1.4673744  | 0.6920178  |
| C | 1.1475740  | -0.3847885 | 0.6505292  |
| C | 0.4481635  | -2.8084605 | 0.7166600  |
| C | -0.7488902 | 2.9323091  | 0.6552498  |
| C | 0.8668246  | 0.9762099  | 0.6498832  |
| F | 2.4386589  | -0.7627827 | 0.6249523  |
| C | 0.6993086  | -3.5864492 | 1.9476174  |
| C | -0.4025794 | -3.8661919 | 1.2743914  |
| C | -0.7945508 | 3.6848310  | -0.6185752 |
| C | 0.1871548  | 3.9782671  | 0.2178355  |
| F | 1.9136050  | 1.8264145  | 0.5906013  |
| C | 1.6317685  | -3.8980919 | 2.9933187  |
| C | -1.5804638 | -4.6571817 | 1.0963795  |
| C | -1.4801922 | 3.8057101  | -1.8727766 |
| C | 1.2628071  | 4.8028531  | 0.6683069  |
| C | 2.3592235  | -2.9014525 | 3.6607304  |
| C | 1.8631548  | -5.2291038 | 3.3789826  |
| C | -2.0948118 | -5.4285324 | 2.1526411  |
| C | -2.2823931 | -4.6845253 | -0.1201055 |

|    |            |            |            |
|----|------------|------------|------------|
| C  | -2.8707396 | 3.6317697  | -1.9686260 |
| C  | -0.7828266 | 4.0466950  | -3.0692406 |
| C  | 1.7125378  | 5.9069861  | -0.0777377 |
| C  | 1.8766580  | 4.5830348  | 1.9158675  |
| F  | 2.1503947  | -1.6114772 | 3.3555724  |
| C  | 3.2688781  | -3.2060442 | 4.6646064  |
| F  | 1.2267980  | -6.2263238 | 2.7449169  |
| C  | 2.7742833  | -5.5539601 | 4.3750016  |
| F  | -1.4861496 | -5.4007085 | 3.3489728  |
| C  | -3.2406962 | -6.1969175 | 2.0091634  |
| F  | -1.8388446 | -3.9712892 | -1.1647247 |
| C  | -3.4272858 | -5.4529697 | -0.2836250 |
| F  | -3.5888443 | 3.4033668  | -0.8591261 |
| C  | -3.5386653 | 3.7184529  | -3.1833417 |
| F  | 0.5549487  | 4.1519778  | -3.0516616 |
| C  | -1.4335926 | 4.1264533  | -4.2931884 |
| F  | 1.1263847  | 6.1996183  | -1.2474284 |
| C  | 2.7377402  | 6.7270372  | 0.3692440  |
| F  | 1.4632956  | 3.5796525  | 2.7024331  |
| C  | 2.9038891  | 5.3942326  | 2.3781218  |
| F  | 3.9362160  | -2.2326850 | 5.3006012  |
| C  | 3.4770192  | -4.5376421 | 5.0209470  |
| F  | 2.9925459  | -6.8339155 | 4.7110237  |
| F  | -3.7164272 | -6.9158149 | 3.0361328  |
| C  | -3.9068287 | -6.2111859 | 0.7836104  |
| F  | -4.0718588 | -5.4743925 | -1.4590906 |
| F  | -4.8703035 | 3.5710805  | -3.2401872 |
| C  | -2.8175290 | 3.9677889  | -4.3497183 |
| F  | -0.7399803 | 4.3405968  | -5.4208537 |
| F  | 3.1474653  | 7.7714880  | -0.3648119 |
| C  | 3.3393062  | 6.4657833  | 1.6002119  |
| F  | 3.4749997  | 5.1591316  | 3.5679734  |
| F  | 4.3530134  | -4.8408136 | 5.9839422  |
| F  | -5.0093382 | -6.9510038 | 0.6336867  |
| F  | -3.4518564 | 4.0479682  | -5.5237070 |
| F  | 4.3264812  | 7.2511305  | 2.0393872  |
| Cl | 1.4264473  | -3.2749110 | -0.7953507 |
| Cl | -1.8910655 | 3.4072465  | 2.0203503  |

7Cl<sup>+</sup> : adduct of 7<sup>2+</sup> and one chloride

61

Energy = -4229.846267862

|   |            |            |            |
|---|------------|------------|------------|
| F | -0.2235777 | -2.5799456 | -0.4499387 |
| C | -0.0687119 | -1.2685883 | -0.6911860 |
| C | 0.8749869  | -0.5875513 | 0.0617902  |
| C | -0.8600862 | -0.6221532 | -1.6534051 |
| F | 1.5759437  | -1.2529490 | 0.9849501  |
| C | 1.0633243  | 0.7982168  | -0.0897307 |
| C | -0.6861321 | 0.7664574  | -1.7826968 |
| C | -1.9051131 | -1.3549396 | -2.4351543 |
| C | 2.0162151  | 1.5097334  | 0.6843337  |
| C | 0.2514529  | 1.4575327  | -1.0325337 |
| F | -1.4379118 | 1.4685307  | -2.6394391 |
| C | -2.4452167 | -2.6767103 | -2.0780322 |
| C | -3.2320527 | -1.6418346 | -1.8366364 |

|    |            |            |            |
|----|------------|------------|------------|
| C  | 2.4531203  | 2.7003502  | 1.2360812  |
| C  | 3.1788270  | 1.5390534  | 1.4351697  |
| F  | 0.4146494  | 2.7683667  | -1.2394775 |
| C  | -2.2060873 | -4.0744333 | -2.2381886 |
| C  | -4.4251814 | -1.0422357 | -1.3170795 |
| C  | 2.2907869  | 4.0944362  | 1.4432008  |
| C  | 4.2936808  | 0.8833835  | 2.0157130  |
| C  | -0.9695208 | -4.5521479 | -2.7115766 |
| C  | -3.2123600 | -5.0286194 | -2.0000614 |
| C  | -5.0903942 | -1.5899805 | -0.2058156 |
| C  | -4.9521748 | 0.1415627  | -1.8599286 |
| C  | 1.0142088  | 4.6923437  | 1.4148371  |
| C  | 3.4062046  | 4.9246424  | 1.6780528  |
| C  | 4.9227124  | 1.4153442  | 3.1610614  |
| C  | 4.8045561  | -0.3155368 | 1.4766094  |
| F  | 0.0174942  | -3.6899704 | -2.9978137 |
| C  | -0.7360194 | -5.9054961 | -2.9090993 |
| F  | -4.4266379 | -4.6255006 | -1.6030221 |
| C  | -2.9953854 | -6.3849450 | -2.1910945 |
| F  | -4.5932352 | -2.6807424 | 0.3955937  |
| C  | -6.2295891 | -1.0023863 | 0.3270081  |
| F  | -4.3573149 | 0.7054268  | -2.9216723 |
| C  | -6.0962700 | 0.7371877  | -1.3451435 |
| F  | -0.0690350 | 3.9275265  | 1.2554621  |
| C  | 0.8530679  | 6.0534221  | 1.6158853  |
| F  | 4.6345054  | 4.4001841  | 1.6573129  |
| C  | 3.2607938  | 6.2896296  | 1.8633714  |
| F  | 4.4308515  | 2.5188615  | 3.7303535  |
| C  | 6.0039483  | 0.7808352  | 3.7492513  |
| F  | 4.2689797  | -0.8191069 | 0.3627296  |
| C  | 5.8952982  | -0.9520355 | 2.0460051  |
| F  | 0.4518526  | -6.3343915 | -3.3557112 |
| C  | -1.7505355 | -6.8246518 | -2.6426556 |
| F  | -3.9705229 | -7.2724994 | -1.9568168 |
| F  | -6.8343009 | -1.5364823 | 1.3965002  |
| C  | -6.7378166 | 0.1619274  | -0.2487627 |
| F  | -6.5894757 | 1.8538725  | -1.8971190 |
| F  | -0.3613888 | 6.6058643  | 1.6175577  |
| C  | 1.9805472  | 6.8504484  | 1.8355569  |
| F  | 4.3250891  | 7.0718280  | 2.0518396  |
| F  | 6.5723233  | 1.2758472  | 4.8501360  |
| C  | 6.4905188  | -0.4025486 | 3.1856280  |
| F  | 6.3901447  | -2.0703873 | 1.5127861  |
| F  | -1.5339258 | -8.1273191 | -2.8307902 |
| F  | -7.8361115 | 0.7296962  | 0.2548269  |
| F  | 1.8335926  | 8.1559472  | 2.0204083  |
| F  | 7.5301451  | -1.0121886 | 3.7397267  |
| Cl | -1.7640725 | -1.0000430 | -4.2257649 |

7<sup>+</sup>r : radical cation

60

Energy = -3769.591662964

|   |           |            |           |
|---|-----------|------------|-----------|
| F | 0.0813909 | -2.7136405 | 0.2871760 |
| C | 0.0663379 | -1.3842598 | 0.0923258 |
| C | 1.1032849 | -0.6249447 | 0.5657199 |



|   |            |            |            |
|---|------------|------------|------------|
| F | -6.6523904 | 1.8283737  | -0.4288965 |
| F | -0.3114364 | 6.4510742  | 2.4431230  |
| C | 1.9992580  | 6.8820681  | 2.1816410  |
| F | 4.3102893  | 7.2953260  | 1.9073577  |
| F | 7.7554198  | 1.4891008  | 3.5918697  |
| C | 7.2028095  | -0.1793890 | 2.0114956  |
| F | 6.6286287  | -1.8445471 | 0.4331476  |
| F | -1.7544361 | -8.1532086 | -2.4346635 |
| F | -8.4019305 | 0.7283655  | -2.1899656 |
| F | 1.7927264  | 8.1665121  | 2.4273208  |
| F | 8.3739511  | -0.7638339 | 2.2104590  |

**8<sup>+</sup>** : adduct of **1<sup>+</sup>** and PPh<sub>3</sub>

60

Energy = -1615.164497839

|   |            |            |            |
|---|------------|------------|------------|
| H | -0.8626927 | -0.0100215 | -2.2909435 |
| C | -0.4223214 | 0.2969271  | -1.3387721 |
| C | -0.5757300 | 1.7100113  | -0.8203146 |
| C | 0.6085700  | 1.3966796  | -1.2926430 |
| C | -1.5020581 | 2.5667018  | -0.1456720 |
| C | 1.9912687  | 1.6492033  | -1.5664188 |
| C | -1.1203523 | 3.8654443  | 0.2476615  |
| C | -2.7910657 | 2.1039468  | 0.1766573  |
| C | 2.5686743  | 2.8990646  | -1.2624329 |
| C | 2.7980528  | 0.6352552  | -2.1169906 |
| H | -0.1280015 | 4.2306649  | 0.0041107  |
| C | -2.0087797 | 4.6713155  | 0.9492566  |
| H | -3.0868968 | 1.1041128  | -0.1230142 |
| C | -3.6745947 | 2.9147857  | 0.8809147  |
| H | 1.9538281  | 3.6867478  | -0.8391898 |
| C | 3.9197030  | 3.1198570  | -1.5019911 |
| H | 2.3547326  | -0.3266173 | -2.3525105 |
| C | 4.1502517  | 0.8636872  | -2.3517410 |
| C | -3.2864090 | 4.1993649  | 1.2696972  |
| H | -1.7066586 | 5.6695825  | 1.2512831  |
| H | -4.6660019 | 2.5474799  | 1.1284334  |
| H | 4.3577738  | 4.0846077  | -1.2645414 |
| C | 4.7148715  | 2.1042546  | -2.0448102 |
| H | 4.7655241  | 0.0754094  | -2.7751117 |
| H | -3.9762963 | 4.8322883  | 1.8197265  |
| H | 5.7704048  | 2.2813376  | -2.2278350 |
| P | -0.3091048 | -1.0452122 | -0.1147028 |
| C | 1.0255272  | -2.1779269 | -0.5255078 |
| C | 1.9504382  | -2.6065342 | 0.4352581  |
| C | 1.1059844  | -2.6499822 | -1.8465513 |
| C | 2.9648174  | -3.4905881 | 0.0680017  |
| H | 1.8818042  | -2.2537365 | 1.4590137  |
| C | 2.1217441  | -3.5316333 | -2.2028167 |
| H | 0.3836045  | -2.3297929 | -2.5923591 |
| C | 3.0534909  | -3.9480492 | -1.2471013 |
| H | 3.6842558  | -3.8196848 | 0.8110809  |
| H | 2.1871995  | -3.8926589 | -3.2243058 |
| H | 3.8468209  | -4.6333988 | -1.5292934 |
| C | -0.0030802 | -0.2698353 | 1.4705427  |
| C | 1.2265457  | 0.3724595  | 1.6952760  |

|   |            |            |            |
|---|------------|------------|------------|
| C | -1.0312231 | -0.1790564 | 2.4188208  |
| C | 1.4201006  | 1.0966037  | 2.8677360  |
| H | 2.0220041  | 0.3102929  | 0.9592289  |
| C | -0.8256878 | 0.5451073  | 3.5909708  |
| H | -1.9845571 | -0.6650326 | 2.2383721  |
| C | 0.3951774  | 1.1837132  | 3.8134200  |
| H | 2.3691990  | 1.5931947  | 3.0432681  |
| H | -1.6201452 | 0.6124849  | 4.3271841  |
| H | 0.5505996  | 1.7502220  | 4.7264770  |
| C | -1.8411753 | -1.9808326 | -0.0702398 |
| C | -1.8999611 | -3.1355849 | 0.7275813  |
| C | -2.9585365 | -1.5791884 | -0.8145593 |
| C | -3.0806456 | -3.8687854 | 0.7924482  |
| H | -1.0292794 | -3.4567204 | 1.2924894  |
| C | -4.1350403 | -2.3250614 | -0.7494604 |
| H | -2.9126391 | -0.7011245 | -1.4499204 |
| C | -4.1973829 | -3.4631610 | 0.0553512  |
| H | -3.1288217 | -4.7579077 | 1.4130418  |
| H | -4.9991254 | -2.0170643 | -1.3294324 |
| H | -5.1154883 | -4.0405113 | 0.1047825  |

**A<sup>+</sup>** : unstable adduct of **2<sup>+</sup>** and alkyne

54

Energy = -1232.733434375

|   |            |            |            |
|---|------------|------------|------------|
| C | -1.0511455 | -1.7932466 | 0.0300311  |
| C | -1.6215659 | -1.5089389 | -1.2204810 |
| C | -1.2675941 | -3.0530130 | 0.6004831  |
| C | -0.2126001 | -0.7463723 | 0.7104993  |
| H | -1.4603284 | -0.5347228 | -1.6735849 |
| C | -2.3925241 | -2.4630763 | -1.8792665 |
| H | -0.8254460 | -3.2960863 | 1.5627614  |
| C | -2.0420208 | -4.0089149 | -0.0603587 |
| C | -0.2949506 | 0.7056756  | 0.3375056  |
| C | 0.7842752  | 0.0624257  | -0.0613817 |
| C | -2.6067494 | -3.7180680 | -1.3020348 |
| H | -2.8299451 | -2.2255398 | -2.8449527 |
| H | -2.1996604 | -4.9816533 | 0.3968617  |
| C | -1.1507598 | 1.8481802  | 0.4526626  |
| C | 2.0513745  | -0.0572225 | -0.7163728 |
| H | -3.2081788 | -4.4611721 | -1.8174149 |
| C | -2.4155018 | 1.7125579  | 1.0568768  |
| C | -0.7494397 | 3.1093525  | -0.0321686 |
| C | 2.7034518  | 1.0654015  | -1.2645051 |
| C | 2.6754114  | -1.3180967 | -0.7864166 |
| H | -2.7276293 | 0.7389120  | 1.4229069  |
| C | -3.2588352 | 2.8129949  | 1.1727144  |
| H | 0.2250006  | 3.2209159  | -0.4975418 |
| C | -1.5978150 | 4.2042583  | 0.0874370  |
| H | 2.2280789  | 2.0400678  | -1.2147329 |
| C | 3.9545890  | 0.9255679  | -1.8544996 |
| H | 2.1655643  | -2.1838897 | -0.3744887 |
| C | 3.9262364  | -1.4505915 | -1.3785787 |
| C | -2.8527925 | 4.0600430  | 0.6892468  |
| H | -4.2334633 | 2.7003095  | 1.6379302  |
| H | -1.2834748 | 5.1734917  | -0.2880836 |

|   |            |            |            |
|---|------------|------------|------------|
| H | 4.4547286  | 1.7948843  | -2.2707749 |
| C | 4.5700453  | -0.3295866 | -1.9113194 |
| H | 4.4000186  | -2.4263491 | -1.4298538 |
| H | -3.5120423 | 4.9181759  | 0.7798393  |
| H | 5.5475764  | -0.4327512 | -2.3728491 |
| C | 0.0654201  | -1.0530364 | 2.1986264  |
| C | 1.2740814  | -1.2576936 | 2.5831890  |
| H | -0.7854368 | -1.0862983 | 2.8778836  |
| C | 2.6034174  | -1.3794516 | 2.8226517  |
| C | 3.2345245  | -2.6658061 | 2.7871479  |
| C | 3.4099771  | -0.2112221 | 3.0482929  |
| C | 4.5916164  | -2.7826705 | 2.9362552  |
| H | 2.6208731  | -3.5457389 | 2.6284042  |
| C | 4.7622275  | -0.3294032 | 3.1968297  |
| H | 2.9278204  | 0.7591360  | 3.0842073  |
| C | 5.3696523  | -1.6126476 | 3.1374341  |
| H | 5.0601408  | -3.7579863 | 2.9003669  |
| H | 5.3960401  | 0.5354132  | 3.3591926  |
| O | 6.6883956  | -1.6217006 | 3.2816501  |
| C | 7.4064774  | -2.8894022 | 3.2410607  |
| H | 7.2593988  | -3.3656706 | 2.2689949  |
| H | 8.4499784  | -2.6180505 | 3.3816400  |
| H | 7.0612614  | -3.5340302 | 4.0521681  |

Bf<sub>3</sub>Cl<sup>-</sup> : adduct of B(C<sub>6</sub>F<sub>5</sub>)<sub>3</sub> and chloride  
35

Energy = -2669.945762765

|   |            |            |            |
|---|------------|------------|------------|
| B | 0.1014441  | 0.0664021  | 0.7491166  |
| C | 0.5158208  | 1.5174255  | 0.1127971  |
| C | -0.2863073 | 2.2884805  | -0.7302213 |
| C | 1.7569510  | 2.0991709  | 0.4004348  |
| C | 0.0726454  | 3.5477864  | -1.2100455 |
| C | 2.1567924  | 3.3498666  | -0.0544643 |
| C | 1.3022410  | 4.0897064  | -0.8647024 |
| C | -1.4919341 | -0.2820985 | 0.6003756  |
| C | -2.0178479 | -1.3538751 | -0.1229813 |
| C | -2.4636849 | 0.5094079  | 1.2253580  |
| C | -3.3768768 | -1.6598481 | -0.1853430 |
| C | -3.8272229 | 0.2431283  | 1.1907974  |
| C | -4.2924000 | -0.8602092 | 0.4834670  |
| F | 2.6759660  | 1.4196842  | 1.1279377  |
| F | -1.4909363 | 1.8345497  | -1.1666963 |
| F | -0.7627221 | 4.2424842  | -2.0141656 |
| F | 1.6694207  | 5.3041607  | -1.3179432 |
| F | 3.3725341  | 3.8476377  | 0.2629905  |
| F | -2.1050533 | 1.6406121  | 1.8791470  |
| F | -4.7083360 | 1.0539457  | 1.8175108  |
| F | -5.6100205 | -1.1373313 | 0.4359655  |
| F | -3.8114684 | -2.7232548 | -0.8974847 |
| F | -1.2151352 | -2.1733796 | -0.8522938 |
| C | 1.0825533  | -1.1589047 | 0.2812641  |
| C | 2.0012683  | -1.1026817 | -0.7680607 |
| C | 1.0581431  | -2.3913249 | 0.9460426  |
| C | 2.8629417  | -2.1457226 | -1.1059457 |
| C | 1.8980529  | -3.4569353 | 0.6455122  |

|    |           |            |            |
|----|-----------|------------|------------|
| C  | 2.8189462 | -3.3328313 | -0.3891631 |
| F  | 0.1464608 | -2.6218269 | 1.9214889  |
| F  | 1.8174945 | -4.6185826 | 1.3315015  |
| F  | 3.6422413 | -4.3532664 | -0.6993108 |
| F  | 3.7355259 | -2.0141853 | -2.1298028 |
| F  | 2.0967656 | -0.0042201 | -1.5630151 |
| Cl | 0.4081472 | 0.2523999  | 2.6827212  |

Bf<sub>3</sub>\_OPEt<sub>3</sub> : adduct of B(C<sub>6</sub>F<sub>5</sub>)<sub>3</sub> and OPt<sub>3</sub>  
57

Energy = -2864.108476470

|   |            |            |            |
|---|------------|------------|------------|
| B | 0.0203436  | 0.0081538  | 0.0142968  |
| C | 0.5543609  | 1.4689110  | -0.5090085 |
| C | 0.2102766  | 2.6297883  | 0.1878113  |
| C | 1.3763563  | 1.6894328  | -1.6140242 |
| C | 0.6618642  | 3.9024816  | -0.1380832 |
| C | 1.8527410  | 2.9467001  | -1.9839667 |
| C | 1.4988212  | 4.0636018  | -1.2378220 |
| C | -1.6080333 | -0.1669395 | -0.0948456 |
| C | -2.4779914 | 0.6671660  | -0.7970853 |
| C | -2.2407285 | -1.2154838 | 0.5773953  |
| C | -3.8632986 | 0.5080002  | -0.8046679 |
| C | -3.6155122 | -1.4140904 | 0.6035890  |
| C | -4.4401068 | -0.5367900 | -0.0936724 |
| F | 1.7536199  | 0.6665769  | -2.4219300 |
| F | -0.6426821 | 2.5567918  | 1.2453106  |
| F | 0.2909296  | 4.9777464  | 0.5870124  |
| F | 1.9485524  | 5.2835387  | -1.5789663 |
| F | 2.6514166  | 3.0896828  | -3.0607348 |
| F | -1.4960948 | -2.1363620 | 1.2474299  |
| F | -4.1554654 | -2.4452796 | 1.2852090  |
| F | -5.7736089 | -0.7049726 | -0.0879956 |
| F | -4.6487829 | 1.3559965  | -1.4986128 |
| F | -2.0099288 | 1.6972350  | -1.5455626 |
| C | 0.8465945  | -1.2471524 | -0.6448874 |
| C | 0.3236547  | -2.1878436 | -1.5318241 |
| C | 2.1887343  | -1.4544733 | -0.3167163 |
| C | 1.0477255  | -3.2723851 | -2.0244327 |
| C | 2.9504699  | -2.5216671 | -0.7774777 |
| C | 2.3711198  | -3.4471008 | -1.6394469 |
| F | 2.8397117  | -0.5653263 | 0.4809366  |
| F | 4.2405990  | -2.6629863 | -0.4095479 |
| F | 3.0854646  | -4.4877313 | -2.1020079 |
| F | 0.4780702  | -4.1519692 | -2.8728154 |
| F | -0.9495864 | -2.0832258 | -1.9898475 |
| P | 0.5774898  | -0.0844005 | 3.0175955  |
| O | 0.3454944  | -0.0324322 | 1.5120732  |
| C | 1.3544722  | 1.4474798  | 3.5893898  |
| C | 2.6523941  | 1.7969549  | 2.8451587  |
| H | 1.5304328  | 1.3305771  | 4.6657365  |
| H | 0.6120408  | 2.2426103  | 3.4660461  |
| H | 3.4297913  | 1.0482700  | 3.0193468  |
| H | 2.4795124  | 1.8665413  | 1.7685261  |
| H | 3.0258224  | 2.7614576  | 3.1994272  |
| C | -0.9749761 | -0.3033556 | 3.9231729  |



|   |            |            |           |
|---|------------|------------|-----------|
| C | -2.0240888 | 0.7849467  | 3.6494696 |
| H | -0.7099634 | -0.3399333 | 4.9871261 |
| H | -1.3597234 | -1.2920746 | 3.6525755 |
| H | -2.2561634 | 0.8476893  | 2.5838264 |
| H | -2.9435892 | 0.5460201  | 4.1905047 |
| H | -1.6801814 | 1.7671356  | 3.9839920 |
| C | 1.6764017  | -1.4582748 | 3.4449881 |
| C | 1.1824307  | -2.8323789 | 2.9684682 |
| H | 1.7983900  | -1.4346879 | 4.5347956 |
| H | 2.6515008  | -1.2245684 | 3.0045771 |
| H | 0.2421159  | -3.1114077 | 3.4511048 |
| H | 1.0275182  | -2.8394371 | 1.8870867 |
| H | 1.9290066  | -3.5916652 | 3.2162872 |

Bf<sub>3</sub> : borane B(C<sub>6</sub>F<sub>5</sub>)<sub>3</sub>

34

Energy = -2209.516695489

|   |            |            |            |
|---|------------|------------|------------|
| B | -0.0026010 | -0.0035691 | 0.0018249  |
| C | 0.1623555  | 1.5511744  | 0.0033796  |
| C | -0.6758152 | 2.3951203  | -0.7407667 |
| C | 1.1616150  | 2.1982255  | 0.7459224  |
| C | -0.5331435 | 3.7761901  | -0.7658848 |
| C | 1.3190166  | 3.5776884  | 0.7665920  |
| C | 0.4683494  | 4.3709175  | -0.0009350 |
| C | -1.4315235 | -0.6367920 | 0.0029897  |
| C | -1.7409286 | -1.7941438 | -0.7281021 |
| C | -2.4950678 | -0.0861165 | 0.7348081  |
| C | -3.0075049 | -2.3627849 | -0.7495082 |
| C | -3.7681774 | -0.6401129 | 0.7578489  |
| C | -4.0263359 | -1.7837358 | 0.0046546  |
| F | 2.0047855  | 1.4780837  | 1.5155451  |
| F | -1.6541907 | 1.8707594  | -1.5086662 |
| F | -1.3440697 | 4.5416687  | -1.5133905 |
| F | 0.6126223  | 5.6993454  | -0.0033627 |
| F | 2.2758772  | 4.1536711  | 1.5116466  |
| F | -2.2978002 | 1.0132976  | 1.4922200  |
| F | -4.7482491 | -0.0902610 | 1.4923513  |
| F | -5.2482098 | -2.3242583 | 0.0055571  |
| F | -3.2614531 | -3.4581265 | -1.4830259 |
| F | -0.7954748 | -2.3885918 | -1.4857259 |
| C | 1.2628800  | -0.9209785 | -0.0021284 |
| C | 2.4180657  | -0.6014207 | -0.7323611 |
| C | 1.3246076  | -2.1195983 | 0.7253097  |
| C | 3.5483078  | -1.4076490 | -0.7568721 |
| C | 2.4453405  | -2.9391400 | 0.7450391  |
| C | 3.5628349  | -2.5821464 | -0.0070769 |
| F | 0.2758153  | -2.5069906 | 1.4810028  |
| F | 2.4654381  | -4.0656207 | 1.4750935  |
| F | 4.6458687  | -3.3645850 | -0.0093315 |
| F | 4.6216556  | -1.0709735 | -1.4894964 |
| F | 2.4542903  | 0.5171905  | -1.4866014 |

Cl<sup>-</sup> : chloride

1

Energy = -460.3919624889

|    |           |           |           |
|----|-----------|-----------|-----------|
| Cl | 0.0000000 | 0.0000000 | 0.0000000 |
|----|-----------|-----------|-----------|

**Fc** : ferrocene

21

Energy = -1651.176296718

|    |            |            |            |
|----|------------|------------|------------|
| Fe | -0.0000073 | 0.0002369  | -0.0000055 |
| C  | -0.0001886 | 1.2195299  | 1.6307331  |
| C  | 0.0009376  | 1.2194385  | -1.6307990 |
| C  | 0.7158842  | -0.9866882 | 1.6306486  |
| C  | -0.7165383 | -0.9863121 | -1.6305967 |
| C  | 0.7169615  | -0.9867990 | -1.6301046 |
| C  | -0.7176196 | -0.9862640 | 1.6301418  |
| C  | 1.1603940  | 0.3764185  | -1.6302617 |
| C  | -1.1601723 | 0.3772392  | 1.6302100  |
| C  | 1.1592870  | 0.3765356  | 1.6309885  |
| C  | -1.1590822 | 0.3771918  | -1.6310177 |
| H  | 0.0001376  | 2.3012708  | 1.6052601  |
| H  | 0.0012986  | 2.3011798  | -1.6053663 |
| H  | 1.3514728  | -1.8620056 | 1.6049870  |
| H  | -1.3526669 | -1.8612355 | -1.6048832 |
| H  | 1.3524815  | -1.8621538 | -1.6039664 |
| H  | -1.3537100 | -1.8612052 | 1.6040323  |
| H  | 2.1893089  | 0.7103252  | -1.6044635 |
| H  | -2.1888745 | 0.7117957  | 1.6043736  |
| H  | 2.1882122  | 0.7104618  | 1.6058486  |
| H  | -2.1877930 | 0.7117827  | -1.6058976 |

**Fc<sup>+</sup>** : ferrocene radical cation

21

Energy = -1650.993361354

|    |            |            |            |
|----|------------|------------|------------|
| Fe | -0.0000008 | -0.0000039 | -0.1101766 |
| C  | -0.0000138 | -1.7634585 | -1.3153126 |
| C  | 0.0000136  | 1.7634544  | -1.3153135 |
| C  | 0.7180769  | -1.6491694 | 0.8784077  |
| C  | -0.7180717 | 1.6491825  | 0.8783986  |
| C  | 0.7181130  | 1.6491468  | 0.8784056  |
| C  | -0.7181178 | -1.6491595 | 0.8784139  |
| C  | 1.1535365  | 1.7178428  | -0.4834779 |
| C  | -1.1535264 | -1.7178833 | -0.4834742 |
| C  | 1.1535017  | -1.7178871 | -0.4834721 |
| C  | -1.1535065 | 1.7178966  | -0.4834723 |
| H  | -0.0000010 | -1.7651327 | -2.3972589 |
| H  | -0.0000024 | 1.7651488  | -2.3972597 |
| H  | 1.3568503  | -1.5970916 | 1.7491922  |
| H  | -1.3568469 | 1.5971245  | 1.7491776  |
| H  | 1.3568928  | 1.5970754  | 1.7491699  |
| H  | -1.3569028 | -1.5970919 | 1.7491784  |
| H  | 2.1797007  | 1.6970078  | -0.8247519 |
| H  | -2.1796919 | -1.6970376 | -0.8247743 |
| H  | 2.1796789  | -1.6970509 | -0.8247364 |
| H  | -2.1796821 | 1.6970869  | -0.8247083 |

HCCPhOMe : alkyne

18

Energy = -423.1805115787

|   |            |            |            |
|---|------------|------------|------------|
| C | 4.1481463  | -0.3006885 | -0.0133508 |
| C | 2.9426490  | -0.1698092 | -0.0031195 |
| H | 5.2093738  | -0.4166312 | -0.0223694 |
| C | 1.5270291  | -0.0135742 | 0.0087476  |
| C | 0.6782523  | -1.1337446 | 0.0303606  |
| C | 0.9421670  | 1.2713543  | -0.0009468 |
| C | -0.7068089 | -0.9888930 | 0.0418635  |
| H | 1.1102892  | -2.1295943 | 0.0382819  |
| C | -0.4345145 | 1.4236772  | 0.0105687  |
| H | 1.5819558  | 2.1480882  | -0.0176772 |
| C | -1.2695049 | 0.2947210  | 0.0319653  |
| H | -1.3326028 | -1.8734224 | 0.0583692  |
| H | -0.8853841 | 2.4113576  | 0.0033178  |
| O | -2.6108271 | 0.5446025  | 0.0417769  |
| C | -3.4962288 | -0.5911493 | 0.0630724  |
| H | -3.3347495 | -1.1896282 | 0.9662833  |
| H | -4.5020668 | -0.1724599 | 0.0672786  |
| H | -3.3510543 | -1.2106530 | -0.8286661 |

OPEt<sub>3</sub> : phosphine oxide

23

Energy = -654.5487161414

|   |            |            |            |
|---|------------|------------|------------|
| P | -0.0001940 | -0.3661962 | 0.1713779  |
| O | -0.0003890 | -1.4117988 | 1.2582403  |
| C | -0.0001628 | 1.3278685  | 0.8551744  |
| C | 0.0009828  | 2.4701136  | -0.1708999 |
| H | 0.8768528  | 1.3897497  | 1.5105211  |
| H | -0.8781210 | 1.3902885  | 1.5092134  |
| H | -0.8837840 | 2.4325163  | -0.8140834 |
| H | 0.0004764  | 3.4372898  | 0.3414118  |
| H | 0.8871636  | 2.4324194  | -0.8121274 |
| C | 1.4455112  | -0.4832910 | -0.9367206 |
| C | 2.7811875  | -0.3492668 | -0.1908642 |
| H | 1.3521648  | 0.2734981  | -1.7248182 |
| H | 1.3731485  | -1.4639817 | -1.4230001 |
| H | 2.8446562  | -1.0787386 | 0.6221135  |
| H | 3.6182403  | -0.5217767 | -0.8743719 |
| H | 2.8993278  | 0.6508017  | 0.2387939  |
| C | -1.4459083 | -0.4831919 | -0.9367718 |
| C | -2.7815924 | -0.3489220 | -0.1909596 |
| H | -1.3736914 | -1.4639729 | -1.4229035 |
| H | -1.3525561 | 0.2734720  | -1.7249912 |
| H | -2.8999677 | 0.6514664  | 0.2378745  |
| H | -3.6186262 | -0.5222567 | -0.8742784 |
| H | -2.8448218 | -1.0777729 | 0.6225985  |

PPh<sub>3</sub> : less basic phosphine

34

Energy = -1036.779108944

|   |            |            |            |
|---|------------|------------|------------|
| P | 0.0578020  | -0.0038816 | -1.3001914 |
| C | 0.6612369  | 1.5200465  | -0.4675093 |
| C | 0.3032144  | 2.7512988  | -1.0407071 |
| C | 1.4514657  | 1.5165881  | 0.6902091  |
| C | 0.7078487  | 3.9512721  | -0.4573416 |
| H | -0.2978667 | 2.7671785  | -1.9472345 |

|   |            |            |            |
|---|------------|------------|------------|
| C | 1.8677177  | 2.7180657  | 1.2666947  |
| H | 1.7400106  | 0.5722485  | 1.1421553  |
| C | 1.4940775  | 3.9370817  | 0.6978665  |
| H | 0.4181956  | 4.8962293  | -0.9087250 |
| H | 2.4802272  | 2.7010309  | 2.1641706  |
| H | 1.8177249  | 4.8711488  | 1.1484086  |
| C | 1.0231146  | -1.3077710 | -0.4352746 |
| C | 0.5485120  | -2.0284937 | 0.6692421  |
| C | 2.3087606  | -1.5884105 | -0.9265861 |
| C | 1.3451997  | -3.0023955 | 1.2743082  |
| H | -0.4452112 | -1.8259926 | 1.0576408  |
| C | 3.1091697  | -2.5515845 | -0.3139950 |
| H | 2.6833456  | -1.0459188 | -1.7918693 |
| C | 2.6274167  | -3.2633753 | 0.7878852  |
| H | 0.9649020  | -3.5536248 | 2.1301429  |
| H | 4.1039926  | -2.7534065 | -0.7015408 |
| H | 3.2465293  | -4.0206212 | 1.2606608  |
| C | -1.6059046 | -0.2086613 | -0.5453766 |
| C | -2.4583269 | -1.1674855 | -1.1171196 |
| C | -2.0628662 | 0.5350494  | 0.5512201  |
| C | -3.7295668 | -1.3923566 | -0.5907447 |
| H | -2.1208762 | -1.7414408 | -1.9773656 |
| C | -3.3409451 | 0.3189512  | 1.0698828  |
| H | -1.4171330 | 1.2831797  | 1.0015389  |
| C | -4.1751494 | -0.6467486 | 0.5039522  |
| H | -4.3755390 | -2.1417234 | -1.0399533 |
| H | -3.6825064 | 0.9026544  | 1.9205057  |
| H | -5.1689463 | -0.8144961 | 0.9094893  |

P(tBu)<sub>3</sub>H<sup>+</sup> : cation

41

Energy = -815.6863569831

|   |            |            |            |
|---|------------|------------|------------|
| P | -0.0002583 | 0.0000728  | -0.3964387 |
| C | 1.6314042  | -0.8036127 | 0.0530277  |
| C | 2.8022581  | 0.1757906  | -0.1702778 |
| C | 1.6349151  | -1.2703826 | 1.5213429  |
| C | 1.8654451  | -1.9962988 | -0.9034451 |
| H | 2.8484268  | 0.5321792  | -1.2026839 |
| H | 2.7785762  | 1.0283680  | 0.5096615  |
| H | 3.7223328  | -0.3832024 | 0.0312303  |
| H | 0.8843214  | -2.0387007 | 1.7166716  |
| H | 2.6180467  | -1.7051942 | 1.7302774  |
| H | 1.4806713  | -0.4421600 | 2.2174452  |
| H | 2.8747897  | -2.3732565 | -0.7065249 |
| H | 1.1677535  | -2.8167875 | -0.7488931 |
| H | 1.8219184  | -1.6828362 | -1.9508888 |
| C | -1.5118410 | -1.0114580 | 0.0531225  |
| C | -1.2490680 | -2.5151276 | -0.1705151 |
| C | -1.9170345 | -0.7811903 | 1.5216381  |
| C | -2.6619993 | -0.6177154 | -0.9029109 |
| H | -0.9644100 | -2.7331753 | -1.2031895 |
| H | -0.4981976 | -2.9208597 | 0.5086960  |
| H | -2.1929682 | -3.0324988 | 0.0318817  |
| H | -2.2079227 | 0.2527805  | 1.7168131  |
| H | -2.7842659 | -1.4161076 | 1.7314095  |

|   |            |            |            |
|---|------------|------------|------------|
| H | -1.1218167 | -1.0607090 | 2.2172055  |
| H | -3.4933481 | -1.3028522 | -0.7052830 |
| H | -3.0231813 | 0.3970258  | -0.7487945 |
| H | -2.3692192 | -0.7373253 | -1.9504129 |
| C | -0.1197491 | 1.8151105  | 0.0533320  |
| C | -1.5532954 | 2.3394972  | -0.1707539 |
| C | 0.2822226  | 2.0514955  | 1.5217292  |
| C | 0.7965296  | 2.6138637  | -0.9029281 |
| H | -1.8841294 | 2.2018299  | -1.2035931 |
| H | -2.2804105 | 1.8921066  | 0.5081459  |
| H | -1.5294974 | 3.4156284  | 0.0314381  |
| H | 1.3220393  | 1.7833166  | 1.7180283  |
| H | 0.1694848  | 3.1206916  | 1.7297661  |
| H | -0.3597039 | 1.5057591  | 2.2176242  |
| H | 0.6178512  | 3.6764708  | -0.7066318 |
| H | 1.8558641  | 2.4202152  | -0.7475647 |
| H | 0.5476704  | 2.4188483  | -1.9504515 |
| H | -0.0002045 | 0.0004005  | -1.7999231 |

P(*t*Bu)<sub>3</sub> : strong basic phosphine

40

Energy = -815.2249339339

|   |            |            |            |
|---|------------|------------|------------|
| P | 0.0001537  | 0.0001221  | -0.6859747 |
| C | 1.7823025  | 0.1080241  | 0.0205435  |
| C | 2.3199069  | 1.5376016  | -0.1938672 |
| C | 1.9864304  | -0.2698352 | 1.4971566  |
| C | 2.6720996  | -0.7953046 | -0.8657493 |
| H | 2.1835844  | 1.8674954  | -1.2291520 |
| H | 1.8562832  | 2.2677563  | 0.4724387  |
| H | 3.3970546  | 1.5329402  | 0.0181594  |
| H | 1.7466415  | -1.3177620 | 1.6916238  |
| H | 3.0433061  | -0.1211811 | 1.7594419  |
| H | 1.3857804  | 0.3494687  | 2.1670187  |
| H | 3.7217157  | -0.6362992 | -0.5841121 |
| H | 2.4539948  | -1.8569822 | -0.7504495 |
| H | 2.5577287  | -0.5337658 | -1.9229769 |
| C | -0.7972375 | -1.5971996 | 0.0206152  |
| C | 0.1721419  | -2.7774330 | -0.1932640 |
| C | -1.2274600 | -1.5852492 | 1.4970494  |
| C | -2.0241874 | -1.9165632 | -0.8659449 |
| H | 0.5264058  | -2.8243745 | -1.2283554 |
| H | 1.0358859  | -2.7409874 | 0.4734860  |
| H | -0.3705807 | -3.7079786 | 0.0184903  |
| H | -2.0162433 | -0.8545254 | 1.6908053  |
| H | -1.6262906 | -2.5752790 | 1.7592085  |
| H | -0.3916458 | -1.3735681 | 2.1674802  |
| H | -2.4118331 | -2.9047386 | -0.5835552 |
| H | -2.8344795 | -1.1965696 | -0.7515060 |
| H | -1.7400869 | -1.9493751 | -1.9230013 |
| C | -0.9848074 | 1.4893163  | 0.0205022  |
| C | -2.4915186 | 1.2396872  | -0.1938782 |
| C | -0.7596749 | 1.8553818  | 1.4970995  |
| C | -0.6476681 | 2.7117416  | -0.8656298 |
| H | -2.7090647 | 0.9568258  | -1.2291598 |
| H | -2.8916817 | 0.4729458  | 0.4724088  |

|   |            |           |            |
|---|------------|-----------|------------|
| H | -3.0263043 | 2.1746769 | 0.0183835  |
| H | 0.2675513  | 2.1730678 | 1.6911426  |
| H | -1.4178237 | 2.6955376 | 1.7595266  |
| H | -0.9940679 | 1.0252774 | 2.1670793  |
| H | -1.3097829 | 3.5413866 | -0.5833778 |
| H | 0.3810098  | 3.0534145 | -0.7507341 |
| H | -0.8175383 | 2.4823037 | -1.9228694 |

P(To)<sub>3</sub>H<sup>+</sup> : cation

44

Energy = -1155.246375121

|   |            |            |            |
|---|------------|------------|------------|
| P | -1.7816918 | -1.1123808 | 0.0411304  |
| C | -1.2154254 | -1.7208818 | 1.6287086  |
| C | -2.9734205 | -2.2260314 | -0.6980017 |
| C | -2.3687922 | 0.5777992  | 0.0827563  |
| C | -1.9225766 | -2.7642381 | 2.2442901  |
| C | -0.0934198 | -1.1262438 | 2.2490654  |
| C | -4.2843684 | -1.7668158 | -0.8983419 |
| C | -2.5836737 | -3.5301244 | -1.0836465 |
| C | -3.2843344 | 1.0401773  | 1.0545083  |
| C | -1.8655887 | 1.4336480  | -0.9122062 |
| C | -1.5206012 | -3.2367076 | 3.4885126  |
| H | -2.7858287 | -3.1993284 | 1.7492527  |
| C | 0.2895198  | -1.6262431 | 3.4976472  |
| C | 0.6659954  | 0.0091831  | 1.6147731  |
| C | -5.2365404 | -2.6078192 | -1.4649973 |
| H | -4.5516085 | -0.7511170 | -0.6239734 |
| C | -3.5621556 | -4.3473371 | -1.6579122 |
| C | -1.1794412 | -4.0429996 | -0.8990124 |
| C | -3.6727421 | 2.3818487  | 0.9796393  |
| C | -3.8276944 | 0.1619973  | 2.1520522  |
| C | -2.2709968 | 2.7628674  | -0.9583930 |
| H | -1.1567240 | 1.0572502  | -1.6442484 |
| C | -0.4108089 | -2.6642614 | 4.1126917  |
| H | -2.0675198 | -4.0438041 | 3.9646173  |
| H | 1.1520401  | -1.1893986 | 3.9931701  |
| H | 1.0008495  | -0.2431344 | 0.6012089  |
| H | 0.0441956  | 0.9090547  | 1.5407310  |
| H | 1.5493807  | 0.2563088  | 2.2067830  |
| C | -4.8713438 | -3.9010408 | -1.8404597 |
| H | -6.2500969 | -2.2525648 | -1.6186221 |
| H | -3.2861697 | -5.3503216 | -1.9713194 |
| H | -0.4306871 | -3.3023993 | -1.2036318 |
| H | -0.9835607 | -4.2964516 | 0.1491449  |
| H | -1.0222571 | -4.9429751 | -1.4970886 |
| C | -3.1770922 | 3.2339214  | -0.0072842 |
| H | -4.3800775 | 2.7609634  | 1.7119227  |
| H | -4.1065852 | -0.8319711 | 1.7873413  |
| H | -3.0839562 | 0.0223375  | 2.9446676  |
| H | -4.7142812 | 0.6188888  | 2.5970079  |
| H | -1.8820475 | 3.4221470  | -1.7273490 |
| H | -0.0875994 | -3.0272455 | 5.0836259  |
| H | -5.6057435 | -4.5637410 | -2.2881680 |
| H | -3.5008553 | 4.2699900  | -0.0327767 |
| H | -0.6675825 | -1.0521944 | -0.8061870 |

P(To)<sub>3</sub> : less basic phosphine

43

Energy = -1154.805466726

|   |            |            |            |
|---|------------|------------|------------|
| P | -1.4424738 | -1.0994628 | -0.1877858 |
| C | -1.3698371 | -1.6113284 | 1.5750357  |
| C | -2.7579772 | -2.1868495 | -0.8674776 |
| C | -2.2785497 | 0.5338524  | -0.0973881 |
| C | -2.2448273 | -2.5676490 | 2.1095563  |
| C | -0.3524563 | -1.0661023 | 2.3933505  |
| C | -4.0556468 | -1.7185545 | -1.1182359 |
| C | -2.4225097 | -3.5191587 | -1.2055895 |
| C | -2.3809475 | 1.3045124  | -1.2795378 |
| C | -2.7535862 | 1.0613209  | 1.1117735  |
| C | -2.1255044 | -2.9933167 | 3.4318865  |
| H | -3.0280572 | -2.9815407 | 1.4809939  |
| C | -0.2511285 | -1.5016533 | 3.7196723  |
| C | 0.5915326  | -0.0132329 | 1.8724091  |
| C | -5.0187966 | -2.5429095 | -1.6985909 |
| H | -4.3118474 | -0.6965286 | -0.8546461 |
| C | -3.4041907 | -4.3339594 | -1.7813887 |
| C | -1.0493457 | -4.0752249 | -0.9295681 |
| C | -2.9553149 | 2.5786599  | -1.2035385 |
| C | -1.9168169 | 0.7660067  | -2.6083437 |
| C | -3.3188182 | 2.3345959  | 1.1691390  |
| H | -2.6791655 | 0.4657110  | 2.0170485  |
| C | -1.1232837 | -2.4578552 | 4.2410645  |
| H | -2.8134294 | -3.7360585 | 3.8264251  |
| H | 0.5310258  | -1.0847200 | 4.3503475  |
| H | 0.9467248  | -0.2676681 | 0.8665135  |
| H | 0.0883516  | 0.9587376  | 1.7934991  |
| H | 1.4528283  | 0.1030651  | 2.5357597  |
| C | -4.6914205 | -3.8573372 | -2.0319179 |
| H | -6.0181685 | -2.1600290 | -1.8862854 |
| H | -3.1491472 | -5.3591965 | -2.0404981 |
| H | -0.2707217 | -3.3567261 | -1.2127697 |
| H | -0.9176938 | -4.2787877 | 0.1406792  |
| H | -0.8882453 | -5.0089438 | -1.4750947 |
| C | -3.4199753 | 3.0973304  | 0.0055563  |
| H | -3.0325305 | 3.1741939  | -2.1105757 |
| H | -0.9441289 | 0.2686962  | -2.5121791 |
| H | -2.6189560 | 0.0156217  | -2.9932945 |
| H | -1.8362200 | 1.5666489  | -3.3485440 |
| H | -3.6791944 | 2.7255421  | 2.1166759  |
| H | -1.0182663 | -2.7826814 | 5.2726077  |
| H | -5.4324157 | -4.5094186 | -2.4861838 |
| H | -3.8566317 | 4.0918137  | 0.0370897  |

**TS0a** : chloride abstraction

71

Energy = -3479.491134933

|   |            |            |            |
|---|------------|------------|------------|
| C | 0.1983233  | -0.1245180 | -2.5843536 |
| C | -0.0922782 | 0.7560306  | -3.6943068 |
| C | 1.1923067  | 0.5841608  | -3.3627337 |
| C | -0.0461641 | -1.5821393 | -2.4466209 |

|    |            |            |            |
|----|------------|------------|------------|
| C  | -1.1391399 | 1.3828425  | -4.4479001 |
| C  | 2.5884935  | 0.8803514  | -3.4971080 |
| C  | -1.2378444 | -2.1359979 | -2.9313155 |
| C  | 0.9349862  | -2.4303167 | -1.9171896 |
| C  | -2.4692809 | 1.2877331  | -3.9956961 |
| C  | -0.8596982 | 2.1115366  | -5.6196804 |
| C  | 3.0745529  | 1.6096401  | -4.5997162 |
| C  | 3.4879657  | 0.4577284  | -2.4999801 |
| C  | -1.4399403 | -3.5150845 | -2.8996111 |
| H  | -2.0004561 | -1.4864707 | -3.3489000 |
| C  | 0.7300498  | -3.8075910 | -1.8795317 |
| H  | 1.8602232  | -2.0115234 | -1.5407803 |
| H  | -2.6775127 | 0.7480140  | -3.0768631 |
| C  | -3.4951615 | 1.9077858  | -4.7008172 |
| H  | 0.1629959  | 2.1865952  | -5.9752342 |
| C  | -1.8918411 | 2.7192158  | -6.3264497 |
| H  | 2.3870854  | 1.9376480  | -5.3727914 |
| C  | 4.4309066  | 1.8983177  | -4.7021028 |
| H  | 3.1087851  | -0.0849081 | -1.6411747 |
| C  | 4.8416287  | 0.7602948  | -2.6026615 |
| C  | -0.4565202 | -4.3545606 | -2.3741018 |
| H  | -2.3662959 | -3.9330462 | -3.2817430 |
| H  | 1.4997565  | -4.4560509 | -1.4708148 |
| C  | -3.2099369 | 2.6200355  | -5.8693734 |
| H  | -4.5179598 | 1.8371165  | -4.3430275 |
| H  | -1.6711275 | 3.2738044  | -7.2335412 |
| H  | 4.8007404  | 2.4555310  | -5.5575543 |
| C  | 5.3167435  | 1.4764954  | -3.7048492 |
| H  | 5.5275171  | 0.4383900  | -1.8249573 |
| H  | -0.6150094 | -5.4285444 | -2.3456825 |
| H  | -4.0126282 | 3.0991008  | -6.4221268 |
| H  | 6.3746780  | 1.7075345  | -3.7868300 |
| Cl | -0.1715765 | 0.7543593  | -0.8182770 |
| B  | -0.3023508 | -0.0430083 | 1.8597200  |
| C  | -0.5704135 | -1.5590153 | 1.5314595  |
| C  | -1.5259942 | 0.9146300  | 2.1497287  |
| C  | 1.1504831  | 0.4688212  | 2.2045059  |
| C  | -1.6778021 | -1.9820993 | 0.7765308  |
| C  | 0.2348170  | -2.5968741 | 2.0221011  |
| C  | -2.7101937 | 0.4658427  | 2.7507724  |
| C  | -1.5030542 | 2.2853721  | 1.8506881  |
| C  | 2.2923815  | 0.0587997  | 1.5020190  |
| C  | 1.4004185  | 1.3783134  | 3.2427922  |
| F  | -2.5352129 | -1.0819176 | 0.2584862  |
| C  | -1.9689256 | -3.3154729 | 0.5266051  |
| F  | 1.3015950  | -2.3287304 | 2.8083899  |
| C  | -0.0168882 | -3.9426402 | 1.7803296  |
| F  | -2.8318535 | -0.8197021 | 3.1517331  |
| C  | -3.8018726 | 1.2880501  | 3.0049667  |
| F  | -0.3991599 | 2.8492858  | 1.3199430  |
| C  | -2.5800640 | 3.1347211  | 2.0697201  |
| F  | 2.1898458  | -0.8493842 | 0.5108695  |
| C  | 3.5682900  | 0.5413802  | 1.7587481  |
| F  | 0.3948927  | 1.8080942  | 4.0370447  |
| C  | 2.6659393  | 1.8679875  | 3.5470764  |

|   |            |            |            |
|---|------------|------------|------------|
| F | -3.0596265 | -3.6631632 | -0.1775417 |
| C | -1.1271012 | -4.3047433 | 1.0263401  |
| F | 0.7960423  | -4.8953497 | 2.2737077  |
| F | -4.9100657 | 0.8003133  | 3.5908274  |
| C | -3.7410102 | 2.6321293  | 2.6511046  |
| F | -2.5085847 | 4.4376247  | 1.7421207  |
| F | 4.6217836  | 0.1241386  | 1.0321899  |
| C | 3.7587032  | 1.4553104  | 2.7916146  |
| F | 2.8438545  | 2.7311611  | 4.5626529  |
| F | -1.3871851 | -5.5963856 | 0.7855558  |
| F | -4.7845260 | 3.4397949  | 2.8813750  |
| F | 4.9842698  | 1.9199184  | 3.0644895  |

**TS0** : chloride abstraction

61

Energy = -3248.291268509

|    |            |            |            |
|----|------------|------------|------------|
| H  | -0.0904939 | -1.0148909 | -1.9163162 |
| C  | -0.0551573 | -0.0405908 | -2.3887897 |
| C  | -0.7236853 | 0.4773641  | -3.5539695 |
| C  | 0.6133460  | 0.4022277  | -3.5841303 |
| C  | -1.9965005 | 0.7966114  | -4.1326468 |
| C  | 1.8925832  | 0.5852141  | -4.2058149 |
| C  | -3.1692983 | 0.6099835  | -3.3769023 |
| C  | -2.0915711 | 1.2954196  | -5.4462212 |
| C  | 2.0048134  | 1.1301796  | -5.4994162 |
| C  | 3.0579956  | 0.2210915  | -3.5048820 |
| H  | -3.0922720 | 0.2365022  | -2.3615036 |
| C  | -4.4104346 | 0.9148920  | -3.9262494 |
| H  | -1.1905085 | 1.4408286  | -6.0334069 |
| C  | -3.3359096 | 1.5930308  | -5.9903118 |
| H  | 1.1103410  | 1.4181441  | -6.0424213 |
| C  | 3.2581614  | 1.3001883  | -6.0770336 |
| H  | 2.9655364  | -0.1976933 | -2.5088525 |
| C  | 4.3084978  | 0.3973247  | -4.0877052 |
| C  | -4.4966446 | 1.4046354  | -5.2325080 |
| H  | -5.3123223 | 0.7722048  | -3.3385987 |
| H  | -3.4044500 | 1.9744650  | -7.0045961 |
| H  | 3.3400913  | 1.7191407  | -7.0753770 |
| C  | 4.4112266  | 0.9355681  | -5.3736333 |
| H  | 5.2044440  | 0.1164787  | -3.5421266 |
| H  | -5.4664994 | 1.6410404  | -5.6600747 |
| H  | 5.3881485  | 1.0723598  | -5.8277729 |
| F  | -2.5380323 | -0.3195791 | -0.0313570 |
| C  | -1.8648426 | -1.4788747 | 0.1324334  |
| C  | -0.6338511 | -1.4906345 | 0.8050616  |
| C  | -2.4610118 | -2.6130495 | -0.4035684 |
| C  | -0.0646294 | -2.7621935 | 0.9547354  |
| B  | 0.0307217  | -0.1680382 | 1.3797340  |
| F  | -3.6314001 | -2.5301004 | -1.0614845 |
| C  | -1.8415837 | -3.8502447 | -0.2445707 |
| F  | 1.0865381  | -2.9256565 | 1.6429141  |
| C  | -0.6387223 | -3.9252458 | 0.4492302  |
| C  | -0.8870111 | 0.8588299  | 2.1674997  |
| C  | 1.5996024  | -0.1249676 | 1.6102446  |
| Cl | 0.0687124  | 1.1529639  | -0.8100060 |

|   |            |            |            |
|---|------------|------------|------------|
| F | -2.4065988 | -4.9570412 | -0.7423131 |
| F | -0.0456926 | -5.1178001 | 0.6303191  |
| C | -2.0376950 | 0.4683717  | 2.8640595  |
| C | -0.5887820 | 2.2259896  | 2.2518106  |
| C | 2.5099799  | -0.6059087 | 0.6596548  |
| C | 2.1906298  | 0.3823410  | 2.7746141  |
| F | -2.4052398 | -0.8327424 | 2.9153513  |
| C | -2.8490156 | 1.3554895  | 3.5646954  |
| F | 0.5225508  | 2.7140638  | 1.6581307  |
| C | -1.3800383 | 3.1460286  | 2.9264956  |
| F | 2.0598172  | -1.1696954 | -0.4848180 |
| C | 3.8880359  | -0.5432689 | 0.8072243  |
| F | 1.4291561  | 0.8207413  | 3.8017795  |
| C | 3.5673186  | 0.4454014  | 2.9718554  |
| F | -3.9391072 | 0.9182684  | 4.2206380  |
| C | -2.5231617 | 2.7069486  | 3.5894667  |
| F | -1.0484985 | 4.4492138  | 2.9586142  |
| F | 4.7065571  | -1.0011506 | -0.1584292 |
| C | 4.4244744  | -0.0106884 | 1.9768608  |
| F | 4.0743672  | 0.9405502  | 4.1146843  |
| F | -3.2938771 | 3.5771133  | 4.2554303  |
| F | 5.7517774  | 0.0475216  | 2.1460692  |

**TS1<sup>+</sup>** : alkyne addition to 2<sup>+</sup>

54

Energy = -1232.718640043

|   |            |            |            |
|---|------------|------------|------------|
| C | -1.8128911 | -1.9939008 | -0.2582452 |
| C | -3.1722745 | -2.3017913 | -0.4107700 |
| C | -0.8535859 | -3.0050451 | -0.4202335 |
| C | -1.4066392 | -0.6098522 | 0.0416810  |
| H | -3.9206939 | -1.5251159 | -0.2899839 |
| C | -3.5618507 | -3.5979621 | -0.7450930 |
| H | 0.1969798  | -2.7757606 | -0.2713769 |
| C | -1.2454635 | -4.2982499 | -0.7484686 |
| C | -1.9316563 | 0.7004508  | -0.1854656 |
| C | -0.6898186 | 0.4261324  | -0.6397076 |
| C | -2.6017713 | -4.5972827 | -0.9125938 |
| H | -4.6155037 | -3.8260411 | -0.8734549 |
| H | -0.4971969 | -5.0745354 | -0.8758332 |
| C | -3.0317057 | 1.5938185  | 0.0147379  |
| C | 0.5171313  | 0.8127898  | -1.3073625 |
| H | -2.9074690 | -5.6075350 | -1.1671035 |
| C | -4.1303530 | 1.1888548  | 0.7984623  |
| C | -3.0233863 | 2.8838478  | -0.5526735 |
| C | 0.7470227  | 2.1616064  | -1.6429603 |
| C | 1.5006558  | -0.1496867 | -1.6076550 |
| H | -4.1363930 | 0.1994263  | 1.2448632  |
| C | -5.1943659 | 2.0577002  | 1.0113991  |
| H | -2.1833440 | 3.1986966  | -1.1626609 |
| C | -4.0958103 | 3.7423543  | -0.3448188 |
| H | -0.0011688 | 2.9102066  | -1.4053510 |
| C | 1.9382173  | 2.5350652  | -2.2538567 |
| H | 1.3262524  | -1.1879776 | -1.3488547 |
| C | 2.6857194  | 0.2293106  | -2.2240569 |
| C | -5.1804534 | 3.3326780  | 0.4380839  |

|   |            |            |            |   |            |            |            |
|---|------------|------------|------------|---|------------|------------|------------|
| H | -6.0356107 | 1.7432929  | 1.6209329  | H | 3.5384524  | -2.0790670 | -1.6907948 |
| H | -4.0888078 | 4.7326178  | -0.7893050 | C | 5.4925467  | -1.6319240 | -2.4876914 |
| H | 2.1138482  | 3.5770403  | -2.5020793 | C | -1.4019428 | 3.8830531  | -3.9918555 |
| C | 2.9084090  | 1.5716568  | -2.5460423 | H | -3.0668255 | 2.6586366  | -3.3765079 |
| H | 3.4392373  | -0.5180645 | -2.4523532 | H | 0.4451812  | 4.8786062  | -4.4931223 |
| H | -6.0147328 | 4.0081547  | 0.6013065  | H | 6.2673510  | 1.1377545  | -4.3138839 |
| H | 3.8379849  | 1.8673368  | -3.0227238 | C | 6.2592597  | -0.7263412 | -3.2260556 |
| C | -0.9292367 | -0.8148640 | 1.9678037  | H | 5.9489952  | -2.5338061 | -2.0907315 |
| C | 0.3018030  | -0.6714718 | 2.0725552  | H | -2.0284080 | 4.6928499  | -4.3537787 |
| H | -1.8474060 | -1.0004160 | 2.4938264  | H | 7.3124815  | -0.9237640 | -3.4026276 |
| C | 1.6515797  | -0.4148216 | 1.8642060  | C | 0.9739063  | -0.4755616 | -0.2855459 |
| C | 2.5628300  | -1.4689818 | 1.6113392  | C | 1.7475320  | -0.4532726 | 0.7042633  |
| C | 2.1128444  | 0.9288526  | 1.7908935  | H | -0.2551856 | -0.3556902 | 0.0694757  |
| C | 3.8671192  | -1.2015787 | 1.2436048  | C | 2.4386782  | -0.4043410 | 1.9072885  |
| H | 2.2217165  | -2.4959201 | 1.6910854  | C | 2.8554318  | -1.5989993 | 2.5462260  |
| C | 3.4079537  | 1.1986356  | 1.4190475  | C | 2.7342450  | 0.8389993  | 2.5317205  |
| H | 1.4212545  | 1.7377668  | 1.9994040  | C | 3.5314999  | -1.5638992 | 3.7517084  |
| C | 4.2919081  | 0.1378756  | 1.1250304  | H | 2.6358523  | -2.5526320 | 2.0776561  |
| H | 4.5467879  | -2.0199353 | 1.0409450  | C | 3.4011794  | 0.8769058  | 3.7349699  |
| H | 3.7684611  | 2.2179626  | 1.3320202  | H | 2.4178070  | 1.7603199  | 2.0545957  |
| O | 5.5246335  | 0.5023828  | 0.7336020  | C | 3.8053405  | -0.3223237 | 4.3566680  |
| C | 6.4781205  | -0.5362350 | 0.4001470  | H | 3.8389106  | -2.4909161 | 4.2199624  |
| H | 6.1032631  | -1.1386461 | -0.4324842 | H | 3.6213336  | 1.8195743  | 4.2252103  |
| H | 7.3818819  | -0.0053924 | 0.1073229  | O | 4.4441189  | -0.1817398 | 5.5370849  |
| H | 6.6722444  | -1.1653537 | 1.2732855  | C | 4.8645718  | -1.3780615 | 6.2332084  |

**TS2<sup>o</sup>** : alkyne deprotonation with P(To)<sub>3</sub>  
97

Energy = -2387.552354010

|   |            |            |            |   |            |            |            |
|---|------------|------------|------------|---|------------|------------|------------|
| C | 0.2418306  | -1.7682837 | -2.3057031 | H | 5.5614533  | -1.9525641 | 5.6156691  |
| C | -0.3540507 | -1.7426355 | -3.5740841 | H | 5.3630833  | -1.0216142 | 7.1331326  |
| C | 0.1150611  | -2.9257615 | -1.5271579 | H | 3.9947618  | -1.9877299 | 6.4969474  |
| C | 0.9839187  | -0.5656055 | -1.7881664 | P | -1.8693194 | 0.1060430  | 0.7182907  |
| H | -0.2587486 | -0.8537974 | -4.1919905 | C | -1.3223618 | 0.0563321  | 2.4401900  |
| C | -1.0758554 | -2.8396959 | -4.0418536 | C | -1.2311464 | 1.2345177  | 3.1980407  |
| H | 0.5863746  | -2.9646209 | -0.5492321 | C | -0.8395368 | -1.1658837 | 2.9619399  |
| C | -0.6067316 | -4.0247778 | -1.9932439 | C | -0.6545309 | 1.2177167  | 4.4631736  |
| C | 1.0317090  | 0.7136250  | -2.5828635 | H | -1.6067721 | 2.1665851  | 2.7889134  |
| C | 2.1561160  | 0.0320996  | -2.5151537 | C | -0.2638208 | -1.1554272 | 4.2365975  |
| C | -1.2107952 | -3.9832804 | -3.2501265 | C | -0.1605577 | 0.0186817  | 4.9792622  |
| H | -1.5411792 | -2.7983765 | -5.0226500 | H | -0.5850711 | 2.1356288  | 5.0386134  |
| H | -0.6993657 | -4.9112515 | -1.3723124 | H | 0.1235888  | -2.0863512 | 4.6418578  |
| C | 0.2169382  | 1.7971677  | -3.0522064 | H | 0.3073072  | -0.0012896 | 5.9590352  |
| C | 3.5426998  | -0.2127694 | -2.7715786 | C | -2.1345674 | 1.8401528  | 0.2724386  |
| H | -1.7818151 | -4.8334969 | -3.6113956 | C | -3.3528961 | 2.4658855  | -0.0751258 |
| C | -1.1851927 | 1.7082131  | -2.9676342 | C | -0.9308013 | 2.5735632  | 0.2295626  |
| C | 0.7971922  | 2.9518823  | -3.6115280 | C | -3.3055445 | 3.8217339  | -0.4279595 |
| C | 4.3237321  | 0.6951651  | -3.5146852 | C | -0.9155553 | 3.9174505  | -0.1178588 |
| C | 4.1429310  | -1.3800897 | -2.2613129 | H | 0.0042885  | 2.0724423  | 0.4671573  |
| H | -1.6316435 | 0.8182770  | -2.5362723 | C | -2.1157264 | 4.5451689  | -0.4491490 |
| C | -1.9864980 | 2.7392822  | -3.4423218 | H | -4.2358093 | 4.3154686  | -0.6968483 |
| H | 1.8783106  | 3.0337553  | -3.6696077 | H | 0.0233791  | 4.4607757  | -0.1483869 |
| C | -0.0099253 | 3.9874936  | -4.0707913 | H | -2.1254225 | 5.5922848  | -0.7360398 |
| H | 3.8664578  | 1.5959593  | -3.9123909 | C | -3.2616866 | -0.9967227 | 0.3946953  |
| C | 5.6710202  | 0.4352485  | -3.7391168 | C | -4.2815722 | -1.3097518 | 1.3219109  |
|   |            |            |            | C | -3.2460070 | -1.5948966 | -0.8778862 |
|   |            |            |            | C | -5.2669490 | -2.2173558 | 0.9166435  |
|   |            |            |            | C | -4.2464314 | -2.4827451 | -1.2588496 |
|   |            |            |            | H | -2.4336202 | -1.3737801 | -1.5649797 |

|   |            |            |            |   |            |            |            |
|---|------------|------------|------------|---|------------|------------|------------|
| C | -5.2596559 | -2.7958130 | -0.3529320 | H | 3.5025754  | -1.6208911 | -6.3458740 |
| H | -6.0639884 | -2.4649580 | 1.6131122  | C | 0.2701951  | -0.2393917 | -0.2792862 |
| H | -4.2242941 | -2.9331676 | -2.2458829 | C | 1.5083388  | -0.0304796 | -0.1671497 |
| H | -6.0451494 | -3.4923585 | -0.6311259 | H | -0.3494060 | -0.1700545 | 0.8285873  |
| C | -0.9424448 | -2.4601635 | 2.1993589  | C | 2.8207580  | 0.2659174  | 0.1493402  |
| H | -0.2041901 | -3.1799096 | 2.5621917  | C | 3.7365578  | -0.7658638 | 0.4880754  |
| H | -1.9360258 | -2.9092152 | 2.3167709  | C | 3.2822598  | 1.6149433  | 0.1502033  |
| H | -0.7863978 | -2.3155107 | 1.1255493  | C | 5.0430692  | -0.4745549 | 0.8256071  |
| C | -4.6876380 | 1.7655031  | -0.0975767 | H | 3.3951580  | -1.7956446 | 0.4843042  |
| H | -4.7031987 | 0.9470005  | -0.8239795 | C | 4.5823072  | 1.9077293  | 0.4876172  |
| H | -4.9378604 | 1.3376565  | 0.8769846  | H | 2.5925172  | 2.4092012  | -0.1143082 |
| H | -5.4729501 | 2.4760897  | -0.3660219 | C | 5.4748640  | 0.8680552  | 0.8311370  |
| C | -4.3586163 | -0.7071886 | 2.7009690  | H | 5.7232471  | -1.2773803 | 1.0821105  |
| H | -5.3652861 | -0.8278512 | 3.1085385  | H | 4.9450297  | 2.9302435  | 0.4966094  |
| H | -3.6561488 | -1.1942030 | 3.3872013  | O | 6.7229184  | 1.2548036  | 1.1480290  |
| H | -4.1098487 | 0.3579803  | 2.6983857  | C | 7.6910737  | 0.2372790  | 1.5042594  |

**TS2<sup>+</sup>** : alkyne deprotonation with P(*t*Bu)<sub>3</sub>  
94

Energy = -2047.980686856

|   |            |            |            |   |            |            |           |
|---|------------|------------|------------|---|------------|------------|-----------|
| C | -1.4947400 | -1.7821626 | -1.2334870 | H | 7.8535935  | -0.4391165 | 0.6603150 |
| C | -2.7650064 | -1.8885325 | -1.8145678 | H | 8.6032653  | 0.7850548  | 1.7328707 |
| C | -0.9937972 | -2.8689961 | -0.5062017 | H | 7.3503350  | -0.3172574 | 2.3832575 |
| C | -0.6648059 | -0.5455507 | -1.4286546 | P | -1.1677665 | 0.0200398  | 2.5327626 |
| H | -3.1607417 | -1.0554909 | -2.3898368 | C | 0.1518318  | -0.7855169 | 3.6384780 |
| C | -3.5213966 | -3.0492182 | -1.6605613 | C | 1.4399549  | 0.0628377  | 3.6643712 |
| H | -0.0059208 | -2.8010827 | -0.0588344 | C | -0.2993153 | -1.0233664 | 5.0909008 |
| C | -1.7460946 | -4.0344751 | -0.3562893 | C | 0.5467370  | -2.1284350 | 2.9808542 |
| C | -1.1289741 | 0.6001733  | -2.2915636 | H | 1.8271119  | 0.2532315  | 2.6608834 |
| C | -0.1819514 | -0.1585353 | -2.8003138 | H | 1.3151047  | 1.0133743  | 4.1844768 |
| C | -3.0158678 | -4.1262253 | -0.9281712 | H | 2.1986474  | -0.5138445 | 4.2067397 |
| H | -4.5085428 | -3.1119071 | -2.1096955 | H | -1.1367607 | -1.7199480 | 5.1589430 |
| H | -1.3409667 | -4.8694307 | 0.2087293  | H | 0.5420664  | -1.4632524 | 5.6409478 |
| C | -2.0258952 | 1.7196969  | -2.3490711 | H | -0.5777727 | -0.0933705 | 5.5913067 |
| C | 0.7951594  | -0.5424858 | -3.7723212 | H | 1.3311578  | -2.5889078 | 3.5931277 |
| H | -3.6062263 | -5.0296390 | -0.8067270 | H | -0.2794648 | -2.8340465 | 2.9075098 |
| C | -3.1042866 | 1.8082380  | -1.4506430 | H | 0.9528555  | -1.9643552 | 1.9783860 |
| C | -1.8453851 | 2.7410158  | -3.3028974 | C | -2.8662129 | -0.7781255 | 2.8342462 |
| C | 0.9771892  | 0.1890392  | -4.9633242 | C | -2.7307327 | -2.3125016 | 2.8826343 |
| C | 1.6044149  | -1.6689659 | -3.5263918 | C | -3.5619939 | -0.2964774 | 4.1207569 |
| H | -3.2506666 | 1.0135188  | -0.7271374 | C | -3.7575737 | -0.4718326 | 1.6109248 |
| C | -3.9812608 | 2.8870357  | -1.5030183 | H | -2.2558791 | -2.7036286 | 1.9794931 |
| H | -1.0108687 | 2.6861245  | -3.9951158 | H | -2.1877133 | -2.6649652 | 3.7608363 |
| C | -2.7216992 | 3.8201623  | -3.3472983 | H | -3.7443165 | -2.7276440 | 2.9320860 |
| H | 0.3547064  | 1.0562468  | -5.1609807 | H | -3.7926876 | 0.7702770  | 4.0933826 |
| C | 1.9453333  | -0.2020614 | -5.8812446 | H | -4.5119671 | -0.8375317 | 4.2142961 |
| H | 1.4599002  | -2.2326996 | -2.6097130 | H | -2.9693410 | -0.5023472 | 5.0141067 |
| C | 2.5738876  | -2.0519618 | -4.4478611 | H | -4.6999781 | -1.0185738 | 1.7341703 |
| C | -3.7918438 | 3.8972343  | -2.4495103 | H | -3.9991630 | 0.5861848  | 1.5143206 |
| H | -4.8135685 | 2.9424165  | -0.8073237 | H | -3.2873329 | -0.8228402 | 0.6879713 |
| H | -2.5716144 | 4.6057339  | -4.0820456 | C | -1.2347664 | 1.8921733  | 2.8459141 |
| H | 2.0795233  | 0.3644528  | -6.7980197 | C | -2.5051982 | 2.4960227  | 2.2169267 |
| C | 2.7465386  | -1.3207506 | -5.6263389 | C | -1.1912804 | 2.2877036  | 4.3335179 |
| H | 3.1945340  | -2.9211799 | -4.2513582 | C | -0.0473787 | 2.5340126  | 2.0902560 |
| H | -4.4744952 | 4.7408068  | -2.4889825 | H | -2.5887448 | 2.2498489  | 1.1557705 |
|   |            |            |            | H | -3.4191932 | 2.1938638  | 2.7306266 |
|   |            |            |            | H | -2.4252890 | 3.5866632  | 2.2974593 |
|   |            |            |            | H | -0.2537086 | 2.0045825  | 4.8151977 |
|   |            |            |            | H | -1.2794966 | 3.3794790  | 4.3982503 |

H -2.0176550 1.8505702 4.8979903  
H -0.0908189 3.6177955 2.2509202  
H 0.9251184 2.1847506 2.4351385  
H -0.1238322 2.3479563 1.0148593

**TS3<sup>+</sup>** : addition of P(tBu)<sub>3</sub>

94

Energy = -2047.985951613

C -3.0477211 -1.1311270 -1.4608854  
C -3.9219586 -0.6890529 -2.4636791  
C -3.4052716 -2.2502766 -0.6986247  
C -1.7469044 -0.4235843 -1.2268575  
H -3.6521021 0.1756297 -3.0642624  
C -5.1283091 -1.3477200 -2.6923625  
H -2.7308153 -2.6155074 0.0724415  
C -4.6143493 -2.9108137 -0.9267374  
C -1.4203467 0.8940082 -1.8864450  
C -0.7921844 -0.1565707 -2.3608539  
C -5.4804204 -2.4612503 -1.9240398  
H -5.7964939 -0.9895195 -3.4707902  
H -4.8750772 -3.7781073 -0.3267742  
C -1.6666056 2.2926784 -1.7014056  
C 0.1563724 -0.8357078 -3.1970076  
H -6.4209901 -2.9738352 -2.1041603  
C -2.5901993 2.7051900 -0.7249997  
C -0.9740845 3.2654006 -2.4433136  
C 1.0832079 -0.1308785 -3.9898410  
C 0.1858122 -2.2427217 -3.1973061  
H -3.1271690 1.9551172 -0.1546453  
C -2.8114731 4.0581629 -0.4922873  
H -0.2614553 2.9562504 -3.1997292  
C -1.2014654 4.6161318 -2.2060282  
H 1.0759219 0.9539610 -3.9852732  
C 2.0196636 -0.8220923 -4.7548797  
H -0.5257864 -2.7830908 -2.5794438  
C 1.1178847 -2.9273062 -3.9716592  
C -2.1190068 5.0159344 -1.2324531  
H -3.5263953 4.3648234 0.2629051  
H -0.6625560 5.3604278 -2.7816608  
H 2.7370220 -0.2722710 -5.3575815  
C 2.0393048 -2.2198222 -4.7499501  
H 1.1314862 -4.0124261 -3.9663473  
H -2.2915531 6.0719898 -1.0517923  
H 2.7687248 -2.7551986 -5.3525870  
C -1.2062310 -0.5582728 0.1969841  
C 0.0856675 -0.5888418 0.3858445  
H -1.9186069 -0.5206364 1.0014942  
C 1.3641016 -0.4931760 -0.1227127  
C 2.1201349 -1.6527881 -0.4343763  
C 1.8683788 0.7812287 -0.5291389  
C 3.2683358 -1.5671452 -1.1945857  
H 1.7562850 -2.6208823 -0.1067040  
C 3.0138708 0.8700071 -1.2798405

H 1.3071850 1.6721425 -0.2749263  
C 3.7104161 -0.3049301 -1.6457750  
H 3.8064788 -2.4674709 -1.4572891  
H 3.3898534 1.8267509 -1.6268961  
O 4.7765571 -0.1205994 -2.4370262  
C 5.5183614 -1.2816677 -2.8922666  
H 4.8593832 -1.9424667 -3.4604633  
H 6.3021604 -0.8774614 -3.5299049  
H 5.9542076 -1.8082263 -2.0400052  
P 0.3981686 -0.0710478 3.1801142  
C 2.2625226 0.0300991 3.5871947  
C 2.8783140 1.2722178 2.9103059  
C 2.5981942 0.0670688 5.0879501  
C 2.9583438 -1.1918835 2.9390636  
H 2.6709025 1.2905049 1.8372029  
H 2.5365475 2.2093134 3.3550349  
H 3.9675685 1.2239958 3.0404804  
H 2.2909217 -0.8477431 5.5993327  
H 3.6862325 0.1571202 5.2025317  
H 2.1357688 0.9179528 5.5920182  
H 4.0424142 -1.0571584 3.0459041  
H 2.6914411 -2.1368957 3.4109443  
H 2.7258323 -1.2571380 1.8734798  
C -0.4203624 -1.3132394 4.3815694  
C 0.4070264 -2.6116389 4.4188773  
C -0.6221845 -0.8085626 5.8196099  
C -1.7799162 -1.7058567 3.7673367  
H 0.5864894 -3.0018931 3.4129340  
H 1.3625948 -2.4871162 4.9273555  
H -0.1682122 -3.3636071 4.9745345  
H -1.2979611 0.0453838 5.8689017  
H -1.0654688 -1.6207556 6.4127327  
H 0.3210870 -0.5301324 6.2865533  
H -2.2358980 -2.4923272 4.3835065  
H -2.4884585 -0.8873421 3.6821666  
H -1.5760798 -2.1203654 2.7854646  
C -0.3833486 1.6524741 3.4490409  
C -1.9169163 1.5300870 3.5295908  
C 0.1155667 2.3998398 4.6963288  
C -0.1025277 2.5036474 2.1878762  
H -2.2889240 1.0222184 2.6379110  
H -2.2675112 1.0134196 4.4242084  
H -2.3315498 2.5437891 3.5397197  
H 1.1794233 2.6278168 4.6350642  
H -0.4220689 3.3525295 4.7727878  
H -0.0647558 1.8374702 5.6150294  
H -0.6293080 3.4587916 2.2946875  
H 0.9545991 2.7208295 2.0367844  
H -0.4918897 2.0034568 1.2973247



## Computational references

- [1] *TURBOMOLE V7.4*, 2019, a development of University of Karlsruhe and Forschungszentrum Karlsruhe GmbH, 1989-2007, TURBOMOLE GmbH, since 2007; available from <http://www.turbomole.com>.
- [2] a) P. Pracht, F. Bohle and S. Grimme, *Phys. Chem. Chem. Phys.*, 2020, **22**, 7169-7192; b) S. Grimme, *J. Chem. Theory Comput.*, 2019, **15**, 2847-2862.
- [3] J. Tao, J. P. Perdew, V. N. Staroverov and G. E. Scuseria, *Phys. Rev. Lett.*, 2003, **91**, 146401.
- [4] a) S. Grimme, J. Antony, S. Ehrlich and H. Krieg, *J. Chem. Phys.*, 2010, **132**, 154104-154119; b) S. Grimme, S. Ehrlich and L. Goerigk, *J. Comput. Chem.*, 2011, **32**, 1456-1465.
- [5] a) F. Weigend, M. Häser, H. Patzelt and R. Ahlrichs, *Chem. Phys. Lett.*, 1998, **294**, 143-152; b) F. Weigend and R. Ahlrichs, *Phys. Chem. Chem. Phys.*, 2005, **7**, 3297-3305.
- [6] A. Klamt and G. Schüürmann, *J. Chem. Soc., Perkin Trans.*, 1993, **2**, 799-805.
- [7] a) K. Eichkorn, F. Weigend, O. Treutler and R. Ahlrichs, *Theor. Chem. Acc.*, 1997, **97**, 119-124; b) F. Weigend, *Phys. Chem. Chem. Phys.*, 2006, **8**, 1057-1065.
- [8] P. Deglmann, K. May, F. Furche and R. Ahlrichs, *Chem. Phys. Lett.* **2004**, *384*, 103-107.
- [9] S. Grimme, *Chem. Eur. J.* 2012, **18**, 9955-9964.
- [10] F. Eckert and A. Klamt, *AIChE J.*, 2002, **48**, 369-385.
- [11] F. Eckert and A. Klamt, *COSMOtherm, Version C3.0, Release 16.01; COSMOlogic GmbH & Co. KG, Leverkusen, Germany* **2015**.
- [12] Y. Zhao and D. G. Truhlar, *J. Phys. Chem. A*, 2005, **109**, 5656-5667.
- [13] F. Weigend, F. Furche and R. Ahlrichs, *J. Chem. Phys.*, 2003, **119**, 12753-12762.
- [14] L. Goerigk, A. Hansen, C. Bauer, S. Ehrlich, A. Najibi and S. Grimme, *Phys. Chem. Chem. Phys.*, 2017, **19**, 32184-32215.
